# Supplementary material
Source: MDPI journal article supplement (https://www.mdpi.com/1999-4907/12/10/1384)
Supplement: s1 [file s1]

Archive with 3 entries (3 files):
- Differentially_expressed_statistics.xlsx
- Supplementary 1.pdf
- Supplementary 2.pdf
