# Supplementary material
Source: MDPI journal article supplement (https://www.mdpi.com/1999-4907/12/10/1384)
Supplement: s1 [file s1 › Differentially_expressed_statistics.xlsx]

## Sheet: Diff_distribution
Compared sample name	up regulated	down regulated
R3/R1	329	466
R4/R1	466	634
R4/R3	296	326

## Sheet: R3vsR1
Protein accession	Protein description	Gene name	R3/R1 Ratio	R3/R1 P value	Regulated Type	MW [kDa]	Coverage [%]	Peptides	Unique peptides	R1_1	R1_2	R1_3	R3_1	R3_2	R3_3	R4_1	R4_2	R4_3	Subcellular localization	KEGG KO No.	KEGG Gene	KEGG pathway	Biological Process	Cellular Component	Molecular Function	Pfam ID	Domain description	KOG category	KOG NO.	KOG description
TRINITY_DN10052_c0_g1_m.31	Rhodanese-like domain-containing protein 4, chloroplastic OS=Arabidopsis thaliana OX=3702 GN=STR4 PE=1 SV=2	STR4	0.6567	0.00309295	Down	45.676	11.8	3	3	1.1744	1.36102	1.37755	0.825205	0.816211	0.9282		0.517415		vacuolar membrane	K17525	CHID1; chitinase domain-containing protein 1							G	KOG2091	Predicted member of glycosyl hydrolase family 18
TRINITY_DN10137_c0_g1_m.134	DNA-directed RNA polymerase I subunit 2 OS=Arabidopsis thaliana OX=3702 GN=NRPA2 PE=2 SV=1	NRPA2	0.5259	7.49062e-05	Down	131.55	8.2	8	8	1.44028	1.55654	1.44362	0.816529	0.73915	0.779501	0.742934	0.759861	0.72158	nucleus	K03002	RPA2, POLR1B; DNA-directed RNA polymerase I subunit RPA2 [EC:2.7.7.6]	map03020 RNA polymerase	GO:0006139 nucleobase-containing compound metabolic process; GO:0006351 transcription, DNA-templated; GO:0006360 transcription by RNA polymerase I; GO:0006725 cellular aromatic compound metabolic process; GO:0006807 nitrogen compound metabolic process; GO:0007275 multicellular organism development; GO:0008152 metabolic process; GO:0009058 biosynthetic process; GO:0009059 macromolecule biosyntheti…	GO:0000428 DNA-directed RNA polymerase complex; GO:0005622 intracellular; GO:0005623 cell; GO:0005634 nucleus; GO:0005730 nucleolus; GO:0005736 RNA polymerase I complex; GO:0005737 cytoplasm; GO:0005829 cytosol; GO:0030880 RNA polymerase complex; GO:0031974 membrane-enclosed lumen; GO:0031981 nuclear lumen; GO:0032991 protein-containing complex; GO:0043226 organelle; GO:0043227 membrane-bounded o…	GO:0003824 catalytic activity; GO:0003899 DNA-directed 5'-3' RNA polymerase activity; GO:0016740 transferase activity; GO:0016772 transferase activity, transferring phosphorus-containing groups; GO:0016779 nucleotidyltransferase activity; GO:0034062 5'-3' RNA polymerase activity; GO:0097747 RNA polymerase activity; GO:0140098 catalytic activity, acting on RNA;	PF04561; PF04565; PF06883; PF00562; PF04560	RNA polymerase Rpb2, domain 2; RNA polymerase Rpb2, domain 3; RNA polymerase I, Rpa2 specific domain ; RNA polymerase Rpb2, domain 6; RNA polymerase Rpb2, domain 7	K	KOG0216	RNA polymerase I, second largest subunit
TRINITY_DN10149_c0_g1_m.149	Beta-glucosidase BoGH3B OS=Bacteroides ovatus (strain ATCC 8483 / DSM 1896 / JCM 5824 / NCTC 11153) OX=411476 GN=BACOVA_02659 PE=1 SV=1	BACOVA_02659	2.2677	1.25571e-07	Up	72.184	34.5	16	15	0.692966	0.688569	0.706157	1.58697	1.58906	1.55834	0.732712	0.732769	0.712463	plasma membrane	K05349	bglX; beta-glucosidase [EC:3.2.1.21]	map00460 Cyanoamino acid metabolism; map00500 Starch and sucrose metabolism; map00940 Phenylpropanoid biosynthesis; map01100 Metabolic pathways; map01110 Biosynthesis of secondary metabolites	GO:0000272 polysaccharide catabolic process; GO:0005975 carbohydrate metabolic process; GO:0005976 polysaccharide metabolic process; GO:0008152 metabolic process; GO:0009056 catabolic process; GO:0009057 macromolecule catabolic process; GO:0009251 glucan catabolic process; GO:0016052 carbohydrate catabolic process; GO:0043170 macromolecule metabolic process; GO:0044042 glucan metabolic process; G…	GO:0000323 lytic vacuole; GO:0005622 intracellular; GO:0005623 cell; GO:0005737 cytoplasm; GO:0005764 lysosome; GO:0005773 vacuole; GO:0005886 plasma membrane; GO:0016020 membrane; GO:0043226 organelle; GO:0043227 membrane-bounded organelle; GO:0043229 intracellular organelle; GO:0043231 intracellular membrane-bounded organelle; GO:0071944 cell periphery;	GO:0003824 catalytic activity; GO:0004553 hydrolase activity, hydrolyzing O-glycosyl compounds; GO:0008422 beta-glucosidase activity; GO:0015926 glucosidase activity; GO:0016787 hydrolase activity; GO:0016798 hydrolase activity, acting on glycosyl bonds;	PF00933; PF01915	Glycosyl hydrolase family 3 N terminal domain; Glycosyl hydrolase family 3 C-terminal domain
TRINITY_DN10173_c0_g1_m.169	L-3-cyanoalanine synthase 1, mitochondrial OS=Malus domestica OX=3750 GN=CAS1 PE=1 SV=1	CAS1	1.6596	5.97235e-06	Up	40.718	46.7	14	14	0.617203	0.613875	0.605967	1.04051	0.988081	1.02024	1.3811	1.36745	1.36559	chloroplast	K13034	ATCYSC1; L-3-cyanoalanine synthase/ cysteine synthase [EC:2.5.1.47 4.4.1.9]	map00270 Cysteine and methionine metabolism; map00460 Cyanoamino acid metabolism; map00920 Sulfur metabolism; map01100 Metabolic pathways; map01110 Biosynthesis of secondary metabolites; map01200 Carbon metabolism; map01230 Biosynthesis of amino acids	GO:0000096 sulfur amino acid metabolic process; GO:0000097 sulfur amino acid biosynthetic process; GO:0002376 immune system process; GO:0006082 organic acid metabolic process; GO:0006520 cellular amino acid metabolic process; GO:0006534 cysteine metabolic process; GO:0006535 cysteine biosynthetic process from serine; GO:0006563 L-serine metabolic process; GO:0006790 sulfur compound metabolic proc…	GO:0005622 intracellular; GO:0005623 cell; GO:0005737 cytoplasm; GO:0005739 mitochondrion; GO:0009507 chloroplast; GO:0009509 chromoplast; GO:0009532 plastid stroma; GO:0009536 plastid; GO:0009570 chloroplast stroma; GO:0043226 organelle; GO:0043227 membrane-bounded organelle; GO:0043229 intracellular organelle; GO:0043231 intracellular membrane-bounded organelle;	GO:0003824 catalytic activity; GO:0004124 cysteine synthase activity; GO:0005488 binding; GO:0005507 copper ion binding; GO:0008144 drug binding; GO:0016740 transferase activity; GO:0016765 transferase activity, transferring alkyl or aryl (other than methyl) groups; GO:0016829 lyase activity; GO:0016846 carbon-sulfur lyase activity; GO:0019842 vitamin binding; GO:0030170 pyridoxal phosphate bindi…			E	KOG1252	Cystathionine beta-synthase and related enzymes
TRINITY_DN10173_c1_g2_m.170	Glucan endo-1,3-beta-glucosidase 11 OS=Arabidopsis thaliana OX=3702 GN=At1g32860 PE=2 SV=1	At1g32860	0.2326	0.00049989	Down	44.991	12.4	4	4	1.84985	1.4219	1.59605	0.303356	0.46002	0.368825				plasma membrane				GO:0007154 cell communication; GO:0009987 cellular process;	GO:0005618 cell wall; GO:0005623 cell; GO:0005886 plasma membrane; GO:0009505 plant-type cell wall; GO:0016020 membrane; GO:0030312 external encapsulating structure; GO:0031224 intrinsic component of membrane; GO:0031225 anchored component of membrane; GO:0031226 intrinsic component of plasma membrane; GO:0046658 anchored component of plasma membrane; GO:0071944 cell periphery;	GO:0003824 catalytic activity; GO:0004553 hydrolase activity, hydrolyzing O-glycosyl compounds; GO:0005488 binding; GO:0008422 beta-glucosidase activity; GO:0015926 glucosidase activity; GO:0016787 hydrolase activity; GO:0016798 hydrolase activity, acting on glycosyl bonds; GO:0030246 carbohydrate binding; GO:0030247 polysaccharide binding; GO:0042973 glucan endo-1,3-beta-D-glucosidase activity;	PF00332	Glycosyl hydrolases family 17
TRINITY_DN10186_c0_g1_m.183	Actin-depolymerizing factor OS=Vitis vinifera OX=29760 PE=2 SV=1	--	2.6531	1.90307e-05	Up	21.341	39.2	5	4	0.5084	0.496781	0.479831	1.24116	1.28927	1.40941	1.17566	1.19986	1.19963	chloroplast	K05765	CFL; cofilin					PF00241	Cofilin/tropomyosin-type actin-binding protein	Z	KOG1735	Actin depolymerizing factor
TRINITY_DN1021_c1_g2_m.221	Homeobox-DDT domain protein RLT2 OS=Arabidopsis thaliana OX=3702 GN=RLT2 PE=1 SV=1	RLT2	1.8492	0.000424854	Up	37.814	25.1	5	4	0.559166	0.646434	0.535245	1.08859	1.06402	1.06656	1.31737	1.3239	1.39872	cytoskeleton	K09510	DNAJB4; DnaJ homolog subfamily B member 4		GO:0000226 microtubule cytoskeleton organization; GO:0001578 microtubule bundle formation; GO:0006996 organelle organization; GO:0007010 cytoskeleton organization; GO:0007017 microtubule-based process; GO:0009987 cellular process; GO:0016043 cellular component organization; GO:0022607 cellular component assembly; GO:0030030 cell projection organization; GO:0030031 cell projection assembly; GO:003…	GO:0005622 intracellular; GO:0005623 cell; GO:0005737 cytoplasm; GO:0005856 cytoskeleton; GO:0005929 cilium; GO:0005930 axoneme; GO:0031514 motile cilium; GO:0032838 plasma membrane bounded cell projection cytoplasm; GO:0036126 sperm flagellum; GO:0042995 cell projection; GO:0043226 organelle; GO:0043228 non-membrane-bounded organelle; GO:0043229 intracellular organelle; GO:0043232 intracellular …		PF00226; PF01556	DnaJ domain; DnaJ C terminal domain	O	KOG0714	Molecular chaperone (DnaJ superfamily)
TRINITY_DN1023_c0_g1_m.235	Transcription-associated protein 1 OS=Drosophila melanogaster OX=7227 GN=Nipped-A PE=1 SV=4	Nipped-A	0.6133	0.000755595	Down	440.3	8.3	21	21	1.21896	1.25377	1.2649	0.74074	0.842619	0.708797	0.924534	1.0198	1.02589	chloroplast	K08874	TRRAP; transformation/transcription domain-associated protein							BDLT	KOG0889	Histone acetyltransferase SAGA, TRRAP/TRA1 component, PI-3 kinase superfamily
TRINITY_DN1024_c0_g1_m.240	Dynein light chain 2, cytoplasmic OS=Rattus norvegicus OX=10116 GN=Dynll2 PE=1 SV=1	Dynll2	0.5583	1.20099e-05	Down	13.193	55.8	5	5	1.52223	1.49604	1.55377	0.824032	0.880165	0.848203	0.588526	0.619428	0.667611	cytoplasm	K10418	DYNLL; dynein light chain LC8-type		GO:0006810 transport; GO:0006928 movement of cell or subcellular component; GO:0006996 organelle organization; GO:0007017 microtubule-based process; GO:0007018 microtubule-based movement; GO:0009987 cellular process; GO:0010970 transport along microtubule; GO:0016043 cellular component organization; GO:0022607 cellular component assembly; GO:0030030 cell projection organization; GO:0030031 cell p…	GO:0005622 intracellular; GO:0005623 cell; GO:0005737 cytoplasm; GO:0005856 cytoskeleton; GO:0005868 cytoplasmic dynein complex; GO:0005875 microtubule associated complex; GO:0005929 cilium; GO:0005930 axoneme; GO:0015629 actin cytoskeleton; GO:0015630 microtubule cytoskeleton; GO:0016459 myosin complex; GO:0030286 dynein complex; GO:0032838 plasma membrane bounded cell projection cytoplasm; GO:0…	GO:0005488 binding; GO:0005515 protein binding; GO:0042802 identical protein binding; GO:0042803 protein homodimerization activity; GO:0045505 dynein intermediate chain binding; GO:0046982 protein heterodimerization activity; GO:0046983 protein dimerization activity; GO:0051959 dynein light intermediate chain binding; GO:0097110 scaffold protein binding;	PF01221	Dynein light chain type 1	Z	KOG3430	Dynein light chain type 1
TRINITY_DN1025_c0_g1_m.248	Chitinase-like protein 1 OS=Arabidopsis thaliana OX=3702 GN=CTL1 PE=1 SV=1	CTL1	0.6172	3.90036e-05	Down	35.09	29.6	6	6	1.29141	1.29758	1.30835	0.827817	0.764324	0.813335	0.968835	0.83784	0.890509	extracellular				GO:0000271 polysaccharide biosynthetic process; GO:0001101 response to acid chemical; GO:0005975 carbohydrate metabolic process; GO:0005976 polysaccharide metabolic process; GO:0006073 cellular glucan metabolic process; GO:0006950 response to stress; GO:0006970 response to osmotic stress; GO:0007275 multicellular organism development; GO:0008152 metabolic process; GO:0009058 biosynthetic process;…	GO:0005576 extracellular region; GO:0005622 intracellular; GO:0005623 cell; GO:0005737 cytoplasm; GO:0005794 Golgi apparatus; GO:0012505 endomembrane system; GO:0043226 organelle; GO:0043227 membrane-bounded organelle; GO:0043229 intracellular organelle; GO:0043231 intracellular membrane-bounded organelle; GO:0048046 apoplast;	GO:0005488 binding; GO:0030246 carbohydrate binding; GO:0030247 polysaccharide binding;	PF00182	Chitinase class I	S	KOG4742	Predicted chitinase
TRINITY_DN10258_c1_g1_m.247	Agglutinin alpha chain OS=Artocarpus integer OX=3490 PE=1 SV=2	--	0.3529	0.00241581	Down	11.28	54.6	2	2	0.92356	0.970193	0.903495	0.236231	0.374409	0.376618	1.58676	1.81594	1.81279	cytoskeleton							PF01419	Jacalin-like lectin domain
TRINITY_DN1026_c1_g1_m.260	Non-specific phospholipase C2 OS=Arabidopsis thaliana OX=3702 GN=NPC2 PE=2 SV=1	NPC2	2.4604	3.67609e-06	Up	62.1	38.6	16	15	0.634273	0.664804	0.686989	1.63752	1.65156	1.59741	0.727794	0.700817	0.698823	nucleus	K01114	plc; phospholipase C [EC:3.1.4.3]	map00562 Inositol phosphate metabolism; map00564 Glycerophospholipid metabolism; map00565 Ether lipid metabolism; map01100 Metabolic pathways; map01110 Biosynthesis of secondary metabolites	GO:0006629 lipid metabolic process; GO:0006644 phospholipid metabolic process; GO:0006793 phosphorus metabolic process; GO:0006796 phosphate-containing compound metabolic process; GO:0008152 metabolic process; GO:0009056 catabolic process; GO:0009395 phospholipid catabolic process; GO:0009987 cellular process; GO:0016042 lipid catabolic process; GO:0016311 dephosphorylation; GO:0019637 organophos…		GO:0003824 catalytic activity; GO:0003993 acid phosphatase activity; GO:0016787 hydrolase activity; GO:0016788 hydrolase activity, acting on ester bonds; GO:0016791 phosphatase activity; GO:0042578 phosphoric ester hydrolase activity;
TRINITY_DN10373_c0_g1_m.335	uncharacterized protein LOC21395589 [Morus notabilis]	--	0.1805	4.50913e-05	Down	25.342	21	3	3	2.2842	2.2045	1.95372	0.41925	0.412922	0.330521	0.398767	0.342484	0.65364	chloroplast	K07025	K07025; putative hydrolase of the HAD superfamily							S	KOG3109	Haloacid dehalogenase-like hydrolase
TRINITY_DN10388_c0_g1_m.353	Probable carboxylesterase 8 OS=Arabidopsis thaliana OX=3702 GN=CXE8 PE=2 SV=1	CXE8	0.6056	0.0176524	Down	37.347	32.5	7	7	1.0015	1.26395	1.35621	0.734788	0.842502	0.616157	0.809382	1.22043	1.15509	cytoplasm				GO:0008152 metabolic process; GO:0009056 catabolic process;		GO:0003824 catalytic activity; GO:0016787 hydrolase activity;	PF07859	alpha/beta hydrolase fold	V	KOG1515	Arylacetamide deacetylase
TRINITY_DN104_c0_g2_m.440	Enolase OS=Oryza sativa subsp. japonica OX=39947 GN=ENO1 PE=1 SV=2	ENO1	1.7172	1.99206e-06	Up	50.51	76.8	35	19	0.735716	0.758238	0.753178	1.26555	1.2865	1.30667	0.989999	0.970433	0.933716	plasma membrane	K01689	ENO, eno; enolase [EC:4.2.1.11]	map00010 Glycolysis / Gluconeogenesis; map01100 Metabolic pathways; map01110 Biosynthesis of secondary metabolites; map01200 Carbon metabolism; map01230 Biosynthesis of amino acids; map03018 RNA degradation	GO:0001101 response to acid chemical; GO:0006950 response to stress; GO:0006970 response to osmotic stress; GO:0009266 response to temperature stimulus; GO:0009314 response to radiation; GO:0009409 response to cold; GO:0009416 response to light stimulus; GO:0009628 response to abiotic stimulus; GO:0009651 response to salt stress; GO:0009719 response to endogenous stimulus; GO:0009725 response to …	GO:0005576 extracellular region; GO:0005622 intracellular; GO:0005623 cell; GO:0005634 nucleus; GO:0005737 cytoplasm; GO:0005739 mitochondrion; GO:0005740 mitochondrial envelope; GO:0005829 cytosol; GO:0005886 plasma membrane; GO:0005911 cell-cell junction; GO:0009506 plasmodesma; GO:0009507 chloroplast; GO:0009536 plastid; GO:0016020 membrane; GO:0030054 cell junction; GO:0031967 organelle envel…	GO:0003676 nucleic acid binding; GO:0003677 DNA binding; GO:0003824 catalytic activity; GO:0004634 phosphopyruvate hydratase activity; GO:0005488 binding; GO:0005507 copper ion binding; GO:0016829 lyase activity; GO:0016835 carbon-oxygen lyase activity; GO:0016836 hydro-lyase activity; GO:0043167 ion binding; GO:0043169 cation binding; GO:0046872 metal ion binding; GO:0046914 transition metal ion…	PF03952; PF00113	Enolase, N-terminal domain; Enolase, C-terminal TIM barrel domain	G	KOG2670	Enolase
TRINITY_DN1041_c0_g1_m.378	Phosphoglucan phosphatase DSP4, amyloplastic OS=Castanea sativa OX=21020 GN=DSP4 PE=1 SV=1	DSP4	1.5647	8.60644e-05	Up	15.476	45.7	4	4	0.861518	0.826727	0.901072	1.36477	1.3175	1.36927	0.835561	0.797198	0.726377	chloroplast				GO:0000272 polysaccharide catabolic process; GO:0005975 carbohydrate metabolic process; GO:0005976 polysaccharide metabolic process; GO:0005982 starch metabolic process; GO:0005983 starch catabolic process; GO:0006073 cellular glucan metabolic process; GO:0006793 phosphorus metabolic process; GO:0006796 phosphate-containing compound metabolic process; GO:0008152 metabolic process; GO:0009056 cata…	GO:0005622 intracellular; GO:0005623 cell; GO:0005737 cytoplasm; GO:0009507 chloroplast; GO:0009532 plastid stroma; GO:0009536 plastid; GO:0009570 chloroplast stroma; GO:0043226 organelle; GO:0043227 membrane-bounded organelle; GO:0043229 intracellular organelle; GO:0043231 intracellular membrane-bounded organelle;	GO:0003824 catalytic activity; GO:0005488 binding; GO:0016787 hydrolase activity; GO:0016788 hydrolase activity, acting on ester bonds; GO:0016791 phosphatase activity; GO:0019203 carbohydrate phosphatase activity; GO:0030246 carbohydrate binding; GO:0030247 polysaccharide binding; GO:0042578 phosphoric ester hydrolase activity; GO:0097367 carbohydrate derivative binding; GO:2001066 amylopectin b…			GV	KOG1716	Dual specificity phosphatase
TRINITY_DN1042_c0_g1_m.380	Small heat shock protein, chloroplastic OS=Solanum lycopersicum OX=4081 GN=HSP21 PE=2 SV=1	HSP21	1.8365	1.30328e-06	Up	26.855	77.1	34	34	0.767931	0.791085	0.78694	1.41423	1.4609	1.43331	0.819598	0.780794	0.745206	chloroplast	K13993	HSP20; HSP20 family protein	map04141 Protein processing in endoplasmic reticulum	GO:0000302 response to reactive oxygen species; GO:0006355 regulation of transcription, DNA-templated; GO:0006950 response to stress; GO:0006979 response to oxidative stress; GO:0006996 organelle organization; GO:0009266 response to temperature stimulus; GO:0009314 response to radiation; GO:0009408 response to heat; GO:0009416 response to light stimulus; GO:0009628 response to abiotic stimulus; G…	GO:0005622 intracellular; GO:0005623 cell; GO:0005737 cytoplasm; GO:0009295 nucleoid; GO:0009507 chloroplast; GO:0009532 plastid stroma; GO:0009536 plastid; GO:0009570 chloroplast stroma; GO:0032991 protein-containing complex; GO:0042644 chloroplast nucleoid; GO:0042646 plastid nucleoid; GO:0043226 organelle; GO:0043227 membrane-bounded organelle; GO:0043228 non-membrane-bounded organelle; GO:004…	GO:0005488 binding; GO:0005515 protein binding; GO:0043621 protein self-association;			O	KOG0710	Molecular chaperone (small heat-shock protein Hsp26/Hsp42)
TRINITY_DN10442_c0_g1_m.413	Perakine reductase OS=Rauvolfia serpentina OX=4060 GN=PR PE=1 SV=1	PR	2.0064	3.91327e-06	Up	37.738	78.7	19	19	0.61199	0.612765	0.594542	1.24065	1.17545	1.23412	1.17334	1.17122	1.18592	cytoplasm							PF00248	Aldo/keto reductase family	C	KOG1575	Voltage-gated shaker-like K+ channel, subunit beta/KCNAB
TRINITY_DN1049_c0_g1_m.438	Pathogenesis-related protein 1 OS=Arabidopsis thaliana OX=3702 GN=At2g14610 PE=1 SV=1	At2g14610	3.2153	9.59749e-06	Up	19.564	55.5	6	6	0.398137	0.397207	0.368702	1.33146	1.20395	1.2074	1.33923	1.3561	1.39781	chloroplast	K13449	PR1; pathogenesis-related protein 1	map04016 MAPK signaling pathway - plant; map04075 Plant hormone signal transduction; map04626 Plant-pathogen interaction				PF00188	Cysteine-rich secretory protein family	L	KOG3017	Defense-related protein containing SCP domain
TRINITY_DN105_c1_g1_m.515	Probable sucrose-phosphate synthase 1 OS=Citrus unshiu OX=55188 GN=SPS1 PE=2 SV=1	SPS1	1.5572	2.93436e-05	Up	55.64	49.6	16	14	0.751408	0.767481	0.755588	1.13739	1.18678	1.21775	1.07498	1.05579	1.05284	chloroplast	K00696	E2.4.1.14; sucrose-phosphate synthase [EC:2.4.1.14]	map00500 Starch and sucrose metabolism; map01100 Metabolic pathways			GO:0003824 catalytic activity; GO:0008194 UDP-glycosyltransferase activity; GO:0016740 transferase activity; GO:0016757 transferase activity, transferring glycosyl groups; GO:0016758 transferase activity, transferring hexosyl groups; GO:0035251 UDP-glucosyltransferase activity; GO:0046524 sucrose-phosphate synthase activity; GO:0046527 glucosyltransferase activity;			M	KOG0853	Glycosyltransferase
TRINITY_DN1053_c0_g2_m.453	Probable ribose-5-phosphate isomerase 3, chloroplastic OS=Arabidopsis thaliana OX=3702 GN=RPI3 PE=1 SV=1	RPI3	0.5688	8.68979e-06	Down	34.532	36	7	7	1.25807	1.26606	1.28044	0.7483	0.703183	0.712381	1.01536	1.02944	0.986755	chloroplast	K01807	rpiA; ribose 5-phosphate isomerase A [EC:5.3.1.6]	map00030 Pentose phosphate pathway; map00710 Carbon fixation in photosynthetic organisms; map01100 Metabolic pathways; map01110 Biosynthesis of secondary metabolites; map01200 Carbon metabolism; map01230 Biosynthesis of amino acids	GO:0005975 carbohydrate metabolic process; GO:0006950 response to stress; GO:0006952 defense response; GO:0008152 metabolic process; GO:0009058 biosynthetic process; GO:0009605 response to external stimulus; GO:0009607 response to biotic stimulus; GO:0009617 response to bacterium; GO:0009719 response to endogenous stimulus; GO:0009725 response to hormone; GO:0009735 response to cytokinin; GO:0009…	GO:0005622 intracellular; GO:0005623 cell; GO:0005737 cytoplasm; GO:0009507 chloroplast; GO:0009526 plastid envelope; GO:0009532 plastid stroma; GO:0009534 chloroplast thylakoid; GO:0009535 chloroplast thylakoid membrane; GO:0009536 plastid; GO:0009570 chloroplast stroma; GO:0009579 thylakoid; GO:0009941 chloroplast envelope; GO:0016020 membrane; GO:0031967 organelle envelope; GO:0031975 envelope…				G	KOG3075	Ribose 5-phosphate isomerase
TRINITY_DN1053_c4_g1_m.464	uncharacterized protein LOC112092430 [Morus notabilis]	--	1.5318	5.84289e-06	Up	92.512	14.1	8	8	0.838851	0.833645	0.842232	1.25122	1.29481	1.30594	0.898035	0.84142	0.893843	nucleus
TRINITY_DN1056_c0_g1_m.495	Putative 4-hydroxy-4-methyl-2-oxoglutarate aldolase 2 OS=Arabidopsis thaliana OX=3702 GN=At5g16450 PE=1 SV=1	At5g16450	1.768	1.22701e-05	Up	17.859	51.8	8	8	0.608738	0.5844	0.585262	1.08089	1.01959	1.04367	1.42995	1.30568	1.34183	cytoplasm
TRINITY_DN10564_c0_g1_m.491	Equilibrative nucleotide transporter 1 OS=Arabidopsis thaliana OX=3702 GN=ENT1 PE=1 SV=1	ENT1	0.2851	1.59155e-05	Down	47.106	12.1	5	5	1.90456	2.01177	1.93305	0.610648	0.529397	0.527612	0.554936	0.370419	0.557613	vacuolar membrane	K15014	SLC29A1_2_3, ENT1_2_3; solute carrier family 29 (equilibrative nucleoside transporter), member 1/2/3			GO:0005622 intracellular; GO:0005623 cell; GO:0005737 cytoplasm; GO:0005773 vacuole; GO:0005774 vacuolar membrane; GO:0016020 membrane; GO:0031090 organelle membrane; GO:0043226 organelle; GO:0043227 membrane-bounded organelle; GO:0043229 intracellular organelle; GO:0043231 intracellular membrane-bounded organelle; GO:0098588 bounding membrane of organelle; GO:0098805 whole membrane;				F	KOG1479	Nucleoside transporter
TRINITY_DN10665_c0_g1_m.557	Probable methyltransferase PMT24 OS=Arabidopsis thaliana OX=3702 GN=At1g29470 PE=2 SV=1	At1g29470	0.4507	0.0133314	Down	83.583	14.7	8	5	1.1861	1.70904	1.61673	0.653823	0.70175			0.567597	0.56496	cytoplasm				GO:0008152 metabolic process; GO:0032259 methylation;	GO:0005622 intracellular; GO:0005623 cell; GO:0005737 cytoplasm; GO:0005768 endosome; GO:0005794 Golgi apparatus; GO:0005802 trans-Golgi network; GO:0005911 cell-cell junction; GO:0009506 plasmodesma; GO:0012505 endomembrane system; GO:0030054 cell junction; GO:0031410 cytoplasmic vesicle; GO:0031982 vesicle; GO:0031984 organelle subcompartment; GO:0043226 organelle; GO:0043227 membrane-bounded o…	GO:0003824 catalytic activity; GO:0008168 methyltransferase activity; GO:0008757 S-adenosylmethionine-dependent methyltransferase activity; GO:0016740 transferase activity; GO:0016741 transferase activity, transferring one-carbon groups;
TRINITY_DN1072_c1_g1_m.597	Dihydrolipoyllysine-residue acetyltransferase component 2 of pyruvate dehydrogenase complex, mitochondrial OS=Arabidopsis thaliana OX=3702 GN=At3g13930 PE=1 SV=2	At3g13930	1.5003	5.57092e-06	Up	59.538	51.9	24	24	0.747479	0.756507	0.755159	1.13661	1.10367	1.14908	1.11546	1.11445	1.12159	mitochondria	K00627	DLAT, aceF, pdhC; pyruvate dehydrogenase E2 component (dihydrolipoamide acetyltransferase) [EC:2.3.1.12]	map00010 Glycolysis / Gluconeogenesis; map00020 Citrate cycle (TCA cycle); map00620 Pyruvate metabolism; map01100 Metabolic pathways; map01110 Biosynthesis of secondary metabolites; map01200 Carbon metabolism		GO:0005622 intracellular; GO:0005623 cell; GO:0005737 cytoplasm; GO:0005739 mitochondrion; GO:0009507 chloroplast; GO:0009526 plastid envelope; GO:0009536 plastid; GO:0009941 chloroplast envelope; GO:0031967 organelle envelope; GO:0031975 envelope; GO:0043226 organelle; GO:0043227 membrane-bounded organelle; GO:0043229 intracellular organelle; GO:0043231 intracellular membrane-bounded organelle;	GO:0005488 binding; GO:0005507 copper ion binding; GO:0043167 ion binding; GO:0043169 cation binding; GO:0046872 metal ion binding; GO:0046914 transition metal ion binding;	PF00364; PF00198	Biotin-requiring enzyme; 2-oxoacid dehydrogenases acyltransferase (catalytic domain)	C	KOG0557	Dihydrolipoamide acetyltransferase
TRINITY_DN1073_c0_g1_m.598	Serine/arginine-rich splicing factor SR45a OS=Arabidopsis thaliana OX=3702 GN=SR45A PE=1 SV=1	SR45A	0.5706	0.0359565	Down	13.544	44.6	3	3	1.1083	1.90264	1.67196	0.793867	0.974612	0.903358	0.561108	0.596209	0.487956	nucleus	K12897	TRA2; transformer-2 protein	map03040 Spliceosome	GO:0006325 chromatin organization; GO:0006464 cellular protein modification process; GO:0006473 protein acetylation; GO:0006475 internal protein amino acid acetylation; GO:0006807 nitrogen compound metabolic process; GO:0006996 organelle organization; GO:0008152 metabolic process; GO:0009987 cellular process; GO:0016043 cellular component organization; GO:0016569 covalent chromatin modification; …		GO:0003676 nucleic acid binding; GO:0003723 RNA binding; GO:0005488 binding; GO:0097159 organic cyclic compound binding; GO:1901363 heterocyclic compound binding;	PF00076	RNA recognition motif. (a.k.a. RRM, RBD, or RNP domain)	A	KOG4661	Hsp27-ERE-TATA-binding protein/Scaffold attachment factor (SAF-B)
TRINITY_DN1082_c0_g1_m.659	Transcription factor TGA1 OS=Arabidopsis thaliana OX=3702 GN=TGA1 PE=1 SV=2	TGA1	0.4225	0.0104291	Down	42.265	15.2	3	3	1.49552	1.63971	1.39883	0.900071	0.524676	0.490668	0.905286	0.856858	0.788386	nucleus	K14431	TGA; transcription factor TGA	map04075 Plant hormone signal transduction
TRINITY_DN1084_c2_g1_m.675	Pumilio homolog 1 OS=Arabidopsis thaliana OX=3702 GN=APUM1 PE=1 SV=1	APUM1	1.7652	0.00105557	Up	88.673	16.6	9	9	0.737424	0.692829	0.617821	1.30639	1.17492	1.13395	1.04387	1.14403	1.14876	nucleus	K17943	PUM; pumilio RNA-binding family			GO:0005622 intracellular; GO:0005623 cell; GO:0005737 cytoplasm; GO:0005829 cytosol;	GO:0003676 nucleic acid binding; GO:0003723 RNA binding; GO:0003729 mRNA binding; GO:0003730 mRNA 3'-UTR binding; GO:0005488 binding; GO:0097159 organic cyclic compound binding; GO:1901363 heterocyclic compound binding;	PF07990	Nucleic acid binding protein NABP	J	KOG1488	Translational repressor Pumilio/PUF3 and related RNA-binding proteins (Puf superfamily)
TRINITY_DN1094_c0_g1_m.709	Cytochrome b5 OS=Borago officinalis OX=13363 PE=2 SV=1	--	0.4709	2.26712e-06	Down	14.597	61.4	6	6	1.40565	1.4634	1.49096	0.68892	0.689242	0.675079	0.859525	0.868538	0.858688	cytoplasm	K23490	CYB5; cytochrome b5					PF00173	Cytochrome b5-like Heme/Steroid binding domain	C	KOG0537	Cytochrome b5
TRINITY_DN1095_c1_g1_m.711	Phosphoinositide phosphatase SAC7 OS=Arabidopsis thaliana OX=3702 GN=SAC7 PE=2 SV=1	SAC7	0.6269	9.08585e-06	Down	68.054	37.8	18	17	1.303	1.32904	1.37647	0.832316	0.838112	0.842346	0.812547	0.831337	0.83483	plasma membrane	K21797	SAC1, SACM1L; phosphatidylinositol 4-phosphatase [EC:3.1.3.-]	map00562 Inositol phosphate metabolism; map01100 Metabolic pathways; map04070 Phosphatidylinositol signaling system	GO:0000902 cell morphogenesis; GO:0000904 cell morphogenesis involved in differentiation; GO:0006629 lipid metabolic process; GO:0006644 phospholipid metabolic process; GO:0006650 glycerophospholipid metabolic process; GO:0006793 phosphorus metabolic process; GO:0006796 phosphate-containing compound metabolic process; GO:0006950 response to stress; GO:0006970 response to osmotic stress; GO:000727…	GO:0005622 intracellular; GO:0005623 cell; GO:0005737 cytoplasm; GO:0005783 endoplasmic reticulum; GO:0005789 endoplasmic reticulum membrane; GO:0005886 plasma membrane; GO:0005911 cell-cell junction; GO:0009506 plasmodesma; GO:0012505 endomembrane system; GO:0016020 membrane; GO:0030054 cell junction; GO:0030427 site of polarized growth; GO:0031520 plasma membrane of cell tip; GO:0031984 organel…	GO:0003824 catalytic activity; GO:0016787 hydrolase activity; GO:0016788 hydrolase activity, acting on ester bonds; GO:0016791 phosphatase activity; GO:0034596 phosphatidylinositol phosphate 4-phosphatase activity; GO:0042578 phosphoric ester hydrolase activity; GO:0043812 phosphatidylinositol-4-phosphate phosphatase activity; GO:0052744 phosphatidylinositol monophosphate phosphatase activity; GO…			I	KOG1889	Putative phosphoinositide phosphatase
TRINITY_DN1095_c1_g1_m.712	Phosphoinositide phosphatase SAC7 OS=Arabidopsis thaliana OX=3702 GN=SAC7 PE=2 SV=1	SAC7	1.5734	0.000280987	Up	23.954	44.5	7	7	0.672116	0.757595	0.697638	1.09725	1.14687	1.1031	1.04889	1.13356	1.343	endoplasmic reticulum
TRINITY_DN11_c0_g1_m.1349	Lactoylglutathione lyase GLX1 OS=Arabidopsis thaliana OX=3702 GN=GLX1 PE=1 SV=1	GLX1	1.6531	7.46534e-06	Up	32.911	62.8	20	20	0.732817	0.732817	0.734324	1.25313	1.19469	1.18886	1.08349	1.04221	1.03765	cytoplasm	K01759	GLO1, gloA; lactoylglutathione lyase [EC:4.4.1.5]	map00620 Pyruvate metabolism; map01100 Metabolic pathways	GO:0006081 cellular aldehyde metabolic process; GO:0006082 organic acid metabolic process; GO:0006089 lactate metabolic process; GO:0006950 response to stress; GO:0006970 response to osmotic stress; GO:0006979 response to oxidative stress; GO:0008152 metabolic process; GO:0009056 catabolic process; GO:0009438 methylglyoxal metabolic process; GO:0009628 response to abiotic stimulus; GO:0009651 res…	GO:0005622 intracellular; GO:0005623 cell; GO:0005737 cytoplasm; GO:0005773 vacuole; GO:0005777 peroxisome; GO:0005829 cytosol; GO:0005886 plasma membrane; GO:0009507 chloroplast; GO:0009526 plastid envelope; GO:0009536 plastid; GO:0009941 chloroplast envelope; GO:0016020 membrane; GO:0031967 organelle envelope; GO:0031975 envelope; GO:0042579 microbody; GO:0043226 organelle; GO:0043227 membrane-…	GO:0003824 catalytic activity; GO:0004462 lactoylglutathione lyase activity; GO:0005488 binding; GO:0016151 nickel cation binding; GO:0016829 lyase activity; GO:0016846 carbon-sulfur lyase activity; GO:0019863 IgE binding; GO:0019865 immunoglobulin binding; GO:0043167 ion binding; GO:0043169 cation binding; GO:0044877 protein-containing complex binding; GO:0046872 metal ion binding; GO:0046914 tr…	PF00903	Glyoxalase/Bleomycin resistance protein/Dioxygenase superfamily	G	KOG2943	Predicted glyoxalase
TRINITY_DN11_c0_g2_m.1350	Glyceraldehyde-3-phosphate dehydrogenase A, chloroplastic OS=Pisum sativum OX=3888 GN=GAPA PE=1 SV=2	GAPA	0.1595	0.000336192	Down	42.898	34.7	9	7	2.1702	1.97545	2.83082	0.420372	0.288319	0.404075	0.487425	0.131586	0.291758	chloroplast	K05298	GAPA; glyceraldehyde-3-phosphate dehydrogenase (NADP+) (phosphorylating) [EC:1.2.1.13]	map00710 Carbon fixation in photosynthetic organisms; map01100 Metabolic pathways; map01200 Carbon metabolism	GO:0005975 carbohydrate metabolic process; GO:0006950 response to stress; GO:0008152 metabolic process; GO:0009058 biosynthetic process; GO:0009266 response to temperature stimulus; GO:0009314 response to radiation; GO:0009409 response to cold; GO:0009416 response to light stimulus; GO:0009628 response to abiotic stimulus; GO:0009743 response to carbohydrate; GO:0009744 response to sucrose; GO:00…	GO:0005576 extracellular region; GO:0005622 intracellular; GO:0005623 cell; GO:0005737 cytoplasm; GO:0009507 chloroplast; GO:0009526 plastid envelope; GO:0009532 plastid stroma; GO:0009534 chloroplast thylakoid; GO:0009535 chloroplast thylakoid membrane; GO:0009536 plastid; GO:0009570 chloroplast stroma; GO:0009579 thylakoid; GO:0009941 chloroplast envelope; GO:0010319 stromule; GO:0016020 membra…	GO:0000166 nucleotide binding; GO:0003824 catalytic activity; GO:0004365 glyceraldehyde-3-phosphate dehydrogenase (NAD+) (phosphorylating) activity; GO:0005488 binding; GO:0005515 protein binding; GO:0016491 oxidoreductase activity; GO:0016620 oxidoreductase activity, acting on the aldehyde or oxo group of donors, NAD or NADP as acceptor; GO:0016903 oxidoreductase activity, acting on the aldehyde…	PF00044; PF02800	Glyceraldehyde 3-phosphate dehydrogenase, NAD binding domain; Glyceraldehyde 3-phosphate dehydrogenase, C-terminal domain	G	KOG0657	Glyceraldehyde 3-phosphate dehydrogenase
TRINITY_DN11002_c0_g1_m.754	uncharacterized protein LOC21404662 [Morus notabilis]	--	4.6351	6.31286e-05	Up	30.786	33.2	7	7	0.335441	0.253391	0.323855	1.4121	1.41392	1.40441	1.31325	1.31299	1.23064	chloroplast							PF00300	Histidine phosphatase superfamily (branch 1)	G	KOG3734	Predicted phosphoglycerate mutase
TRINITY_DN1101_c0_g1_m.762	Loganic acid O-methyltransferase OS=Catharanthus roseus OX=4058 GN=LAMT PE=1 SV=1	LAMT	1.831	0.00245652	Up	30.977	31.5	5	5	0.395757	0.301564	0.355543	0.657958	0.590444	0.679387	2.01907	2.07999	1.92029	mitochondria	K21483	SAMT; salicylate 1-O-methyltransferase [EC:2.1.1.274]
TRINITY_DN11039_c0_g1_m.777	5'-nucleotidase SurE OS=Thermosipho africanus (strain TCF52B) OX=484019 GN=surE PE=3 SV=1	surE	1.6491	0.00699566	Up	31.604	33	6	6	0.313359	0.423217	0.415541	0.614536	0.623921	0.661523	2.02731	1.91714	2.00346	cytoplasm	K03787	surE; 5'-nucleotidase [EC:3.1.3.5]	map00230 Purine metabolism; map00240 Pyrimidine metabolism; map00760 Nicotinate and nicotinamide metabolism; map01100 Metabolic pathways; map01110 Biosynthesis of secondary metabolites
TRINITY_DN11050_c0_g1_m.785	11-beta-hydroxysteroid dehydrogenase 1B OS=Arabidopsis thaliana OX=3702 GN=HSD1 PE=1 SV=1	HSD1	3.2591	2.05834e-07	Up	43.132	42.3	11	11	0.520667	0.508641	0.526198	1.7142	1.64777	1.70753	0.827815	0.778435	0.768737	nucleus	K22418	HSD1; 11beta/17beta-hydroxysteroid dehydrogenase [EC:1.1.1.146 1.1.1.-]			GO:0005622 intracellular; GO:0005623 cell; GO:0005811 lipid droplet; GO:0016020 membrane; GO:0043226 organelle; GO:0043228 non-membrane-bounded organelle; GO:0043229 intracellular organelle; GO:0043232 intracellular non-membrane-bounded organelle;		PF00106	short chain dehydrogenase	Q	KOG1205	Predicted dehydrogenase
TRINITY_DN1106_c0_g2_m.795	Chloroplastic import inner membrane translocase subunit HP30-2 OS=Arabidopsis thaliana OX=3702 GN=HP30-2 PE=1 SV=1	HP30-2	0.6057	8.72335e-05	Down	27.557	32.6	7	7	1.25864	1.24893	1.22348	0.799264	0.730942	0.72985	0.958864	1.02644	1.02359	chloroplast				GO:0006403 RNA localization; GO:0006605 protein targeting; GO:0006810 transport; GO:0006839 mitochondrial transport; GO:0006886 intracellular protein transport; GO:0006996 organelle organization; GO:0007005 mitochondrion organization; GO:0008104 protein localization; GO:0009987 cellular process; GO:0015031 protein transport; GO:0015833 peptide transport; GO:0015931 nucleobase-containing compound …	GO:0005622 intracellular; GO:0005623 cell; GO:0005737 cytoplasm; GO:0005739 mitochondrion; GO:0005773 vacuole; GO:0005774 vacuolar membrane; GO:0005886 plasma membrane; GO:0009507 chloroplast; GO:0009526 plastid envelope; GO:0009528 plastid inner membrane; GO:0009536 plastid; GO:0009706 chloroplast inner membrane; GO:0009941 chloroplast envelope; GO:0016020 membrane; GO:0019866 organelle inner me…	GO:0005488 binding; GO:0005515 protein binding; GO:0043621 protein self-association;	PF00536	SAM domain (Sterile alpha motif)
TRINITY_DN1111_c0_g1_m.827	Shaggy-related protein kinase alpha OS=Arabidopsis thaliana OX=3702 GN=ASK1 PE=1 SV=3	ASK1	0.5632	0.000207596	Down	46.172	4.4	2	1	1.43816	1.48016	1.43828	0.792526		0.843197		0.430855	0.57682	cytoplasm	K03083	GSK3B; glycogen synthase kinase 3 beta [EC:2.7.11.26]		GO:0006464 cellular protein modification process; GO:0006468 protein phosphorylation; GO:0006793 phosphorus metabolic process; GO:0006796 phosphate-containing compound metabolic process; GO:0006807 nitrogen compound metabolic process; GO:0006950 response to stress; GO:0006970 response to osmotic stress; GO:0006972 hyperosmotic response; GO:0008152 metabolic process; GO:0009628 response to abiotic…	GO:0005622 intracellular; GO:0005623 cell; GO:0005737 cytoplasm; GO:0005829 cytosol;	GO:0003824 catalytic activity; GO:0004672 protein kinase activity; GO:0004674 protein serine/threonine kinase activity; GO:0016301 kinase activity; GO:0016740 transferase activity; GO:0016772 transferase activity, transferring phosphorus-containing groups; GO:0016773 phosphotransferase activity, alcohol group as acceptor; GO:0140096 catalytic activity, acting on a protein;	PF00069	Protein kinase domain	T	KOG0658	Glycogen synthase kinase-3
TRINITY_DN1120_c0_g1_m.867	Probable aldo-keto reductase 2 OS=Oryza sativa subsp. japonica OX=39947 GN=Os04g0338000 PE=2 SV=2	Os04g0338000	1.9914	2.8683e-07	Up	38.314	81.1	25	25	0.408206	0.415585	0.410427	0.829768	0.805719	0.822315	1.82062	1.77078	1.71658	nucleus							PF00248	Aldo/keto reductase family	C	KOG1575	Voltage-gated shaker-like K+ channel, subunit beta/KCNAB
TRINITY_DN11270_c0_g2_m.900	Probable beta-D-xylosidase 7 OS=Arabidopsis thaliana OX=3702 GN=BXL7 PE=2 SV=2	BXL7	1.7304	2.47366e-06	Up	86.075	33.7	19	19	0.700949	0.695627	0.702102	1.23573	1.17971	1.21621	1.12353	1.06718	1.07896	chloroplast					GO:0005576 extracellular region; GO:0005618 cell wall; GO:0005622 intracellular; GO:0005623 cell; GO:0005737 cytoplasm; GO:0005911 cell-cell junction; GO:0009505 plant-type cell wall; GO:0009506 plasmodesma; GO:0009507 chloroplast; GO:0009536 plastid; GO:0030054 cell junction; GO:0030312 external encapsulating structure; GO:0043226 organelle; GO:0043227 membrane-bounded organelle; GO:0043229 intr…		PF00933; PF01915	Glycosyl hydrolase family 3 N terminal domain; Glycosyl hydrolase family 3 C-terminal domain
TRINITY_DN1135_c0_g1_m.950	Beta-glucosidase 42 OS=Arabidopsis thaliana OX=3702 GN=BGLU42 PE=2 SV=1	BGLU42	1.5926	8.2247e-06	Up	57.576	79.4	30	30	0.78287	0.760119	0.770045	1.24865	1.23966	1.19543	1.01193	1.00594	0.985349	cytoskeleton	K01188	E3.2.1.21; beta-glucosidase [EC:3.2.1.21]	map00460 Cyanoamino acid metabolism; map00500 Starch and sucrose metabolism; map00940 Phenylpropanoid biosynthesis; map01100 Metabolic pathways; map01110 Biosynthesis of secondary metabolites	GO:0000160 phosphorelay signal transduction system; GO:0000302 response to reactive oxygen species; GO:0002218 activation of innate immune response; GO:0002252 immune effector process; GO:0002253 activation of immune response; GO:0002376 immune system process; GO:0002682 regulation of immune system process; GO:0002684 positive regulation of immune system process; GO:0006950 response to stress; GO…	GO:0005622 intracellular; GO:0005623 cell; GO:0005737 cytoplasm; GO:0005829 cytosol;	GO:0003824 catalytic activity; GO:0004553 hydrolase activity, hydrolyzing O-glycosyl compounds; GO:0008422 beta-glucosidase activity; GO:0015926 glucosidase activity; GO:0016787 hydrolase activity; GO:0016798 hydrolase activity, acting on glycosyl bonds;	PF00232	Glycosyl hydrolase family 1	G	KOG0626	Beta-glucosidase, lactase phlorizinhydrolase, and related proteins
TRINITY_DN1136_c0_g1_m.961	Cytochrome P450 71A1 OS=Persea americana OX=3435 GN=CYP71A1 PE=1 SV=2	CYP71A1	0.2849	0.00133015	Down	22.676	20.5	4	2	1.88053	2.00911	1.93999	0.466756	0.452976	0.740988	0.277762	0.426249	0.805646	cytoplasm	K20617	CYP71A; cytochrome P450 family 71 subfamily A		GO:0008152 metabolic process; GO:0009058 biosynthetic process; GO:0019748 secondary metabolic process; GO:0044550 secondary metabolite biosynthetic process; GO:0055114 oxidation-reduction process;	GO:0005622 intracellular; GO:0005623 cell; GO:0005737 cytoplasm; GO:0005783 endoplasmic reticulum; GO:0005789 endoplasmic reticulum membrane; GO:0012505 endomembrane system; GO:0016020 membrane; GO:0031090 organelle membrane; GO:0031984 organelle subcompartment; GO:0042175 nuclear outer membrane-endoplasmic reticulum membrane network; GO:0043226 organelle; GO:0043227 membrane-bounded organelle; G…	GO:0003824 catalytic activity; GO:0004497 monooxygenase activity; GO:0016491 oxidoreductase activity; GO:0016705 oxidoreductase activity, acting on paired donors, with incorporation or reduction of molecular oxygen; GO:0016709 oxidoreductase activity, acting on paired donors, with incorporation or reduction of molecular oxygen, NAD(P)H as one donor, and incorporation of one atom of oxygen;	PF00067	Cytochrome P450	Q	KOG0156	Cytochrome P450 CYP2 subfamily
TRINITY_DN114_c0_g1_m.1029	Phenylalanine ammonia-lyase OS=Digitalis lanata OX=49450 PE=2 SV=1	--	0.5434	5.04825e-07	Down	78.652	63.9	37	37	1.39422	1.43655	1.42792	0.778973	0.766773	0.768334	0.815151	0.80924	0.802844	nucleus	K10775	PAL; phenylalanine ammonia-lyase [EC:4.3.1.24]	map00360 Phenylalanine metabolism; map00940 Phenylpropanoid biosynthesis; map01100 Metabolic pathways; map01110 Biosynthesis of secondary metabolites	GO:0001101 response to acid chemical; GO:0006464 cellular protein modification process; GO:0006508 proteolysis; GO:0006511 ubiquitin-dependent protein catabolic process; GO:0006725 cellular aromatic compound metabolic process; GO:0006807 nitrogen compound metabolic process; GO:0008152 metabolic process; GO:0009056 catabolic process; GO:0009057 macromolecule catabolic process; GO:0009058 biosynthe…		GO:0003824 catalytic activity; GO:0016829 lyase activity; GO:0016840 carbon-nitrogen lyase activity; GO:0016841 ammonia-lyase activity; GO:0045548 phenylalanine ammonia-lyase activity;			Q	KOG0222	Phenylalanine and histidine ammonia-lyase
TRINITY_DN114_c1_g1_m.1031	Copper transporter 5.1 OS=Oryza sativa subsp. japonica OX=39947 GN=COPT5.1 PE=2 SV=1	COPT5.1	0.5509	0.00666543	Down	15.891	22.9	2	2	1.24674	1.49562	1.26804		0.690525	0.782366	0.874488	0.835137	0.807084	chloroplast	K14686	SLC31A1, CTR1; solute carrier family 31 (copper transporter), member 1							P	KOG3386	Copper transporter
TRINITY_DN1140_c0_g2_m.984	Eukaryotic translation initiation factor 2 subunit alpha homolog OS=Arabidopsis thaliana OX=3702 GN=At2g40290 PE=1 SV=2	At2g40290	1.8359	1.13906e-07	Up	38.845	34	11	11	0.753566	0.756723	0.76186	1.38475	1.3787	1.40789	0.854286	0.875162	0.827064	cytoplasm	K03237	EIF2S1; translation initiation factor 2 subunit 1	map03013 RNA transport; map04141 Protein processing in endoplasmic reticulum	GO:0000075 cell cycle checkpoint; GO:0000077 DNA damage checkpoint; GO:0000278 mitotic cell cycle; GO:0002181 cytoplasmic translation; GO:0002183 cytoplasmic translational initiation; GO:0006412 translation; GO:0006413 translational initiation; GO:0006518 peptide metabolic process; GO:0006807 nitrogen compound metabolic process; GO:0006950 response to stress; GO:0006974 cellular response to DNA d…	GO:0005622 intracellular; GO:0005623 cell; GO:0005634 nucleus; GO:0005737 cytoplasm; GO:0005829 cytosol; GO:0005840 ribosome; GO:0005850 eukaryotic translation initiation factor 2 complex; GO:0005851 eukaryotic translation initiation factor 2B complex; GO:0032991 protein-containing complex; GO:0033290 eukaryotic 48S preinitiation complex; GO:0043226 organelle; GO:0043227 membrane-bounded organell…	GO:0003676 nucleic acid binding; GO:0003723 RNA binding; GO:0003729 mRNA binding; GO:0003743 translation initiation factor activity; GO:0005488 binding; GO:0008135 translation factor activity, RNA binding; GO:0043021 ribonucleoprotein complex binding; GO:0043022 ribosome binding; GO:0044877 protein-containing complex binding; GO:0097159 organic cyclic compound binding; GO:1901363 heterocyclic com…	PF00575	S1 RNA binding domain	J	KOG2916	Translation initiation factor 2, alpha subunit (eIF-2alpha)
TRINITY_DN11416_c0_g1_m.986	Purple acid phosphatase 3 OS=Arabidopsis thaliana OX=3702 GN=PAP3 PE=2 SV=1	PAP3	0.3023	2.04796e-05	Down	44.214	14.8	5	5	1.14255	0.987941	1.11402	0.343609	0.317162	0.319928	1.58941	1.58774	1.59764	plasma membrane	K14379	ACP5; tartrate-resistant acid phosphatase type 5 [EC:3.1.3.2]	map00740 Riboflavin metabolism; map01100 Metabolic pathways	GO:0000302 response to reactive oxygen species; GO:0006793 phosphorus metabolic process; GO:0006796 phosphate-containing compound metabolic process; GO:0006873 cellular ion homeostasis; GO:0006950 response to stress; GO:0006979 response to oxidative stress; GO:0008152 metabolic process; GO:0009636 response to toxic substance; GO:0009987 cellular process; GO:0010035 response to inorganic substance…	GO:0005622 intracellular; GO:0005623 cell; GO:0005737 cytoplasm; GO:0005773 vacuole; GO:0009986 cell surface; GO:0043226 organelle; GO:0043227 membrane-bounded organelle; GO:0043229 intracellular organelle; GO:0043231 intracellular membrane-bounded organelle;	GO:0003824 catalytic activity; GO:0003993 acid phosphatase activity; GO:0016787 hydrolase activity; GO:0016788 hydrolase activity, acting on ester bonds; GO:0016791 phosphatase activity; GO:0042578 phosphoric ester hydrolase activity;	PF00149	Calcineurin-like phosphoesterase	O	KOG2679	Purple (tartrate-resistant) acid phosphatase
TRINITY_DN1143_c0_g1_m.995	Phosphatidylinositol/phosphatidylcholine transfer protein SFH9 OS=Arabidopsis thaliana OX=3702 GN=SFH9 PE=2 SV=1	SFH9	3.4367	1.22564e-06	Up	38.268	39.8	10	10	0.461747	0.495404	0.486182	1.68795	1.60283	1.66948	0.879262	0.863916	0.853238	cytoplasm							PF03765; PF00650	CRAL/TRIO, N-terminal domain; CRAL/TRIO domain	I	KOG1471	Phosphatidylinositol transfer protein SEC14 and related proteins
TRINITY_DN1151_c0_g1_m.1053	Glutathione S-transferase F8, chloroplastic OS=Arabidopsis thaliana OX=3702 GN=GSTF8 PE=1 SV=3	GSTF8	0.5848	0.0184593	Down	28.127	26.1	5	5	1.35991	1.34923	1.24089	0.863454	0.877124	0.569511	0.930043	0.908055	0.901789	nucleus	K00799	GST, gst; glutathione S-transferase [EC:2.5.1.18]	map00480 Glutathione metabolism; map01100 Metabolic pathways	GO:0006518 peptide metabolic process; GO:0006575 cellular modified amino acid metabolic process; GO:0006749 glutathione metabolic process; GO:0006790 sulfur compound metabolic process; GO:0006807 nitrogen compound metabolic process; GO:0006950 response to stress; GO:0006952 defense response; GO:0006970 response to osmotic stress; GO:0008152 metabolic process; GO:0009056 catabolic process; GO:0009…	GO:0005622 intracellular; GO:0005623 cell; GO:0005634 nucleus; GO:0005737 cytoplasm; GO:0005773 vacuole; GO:0005774 vacuolar membrane; GO:0009507 chloroplast; GO:0009526 plastid envelope; GO:0009532 plastid stroma; GO:0009536 plastid; GO:0009570 chloroplast stroma; GO:0009579 thylakoid; GO:0009941 chloroplast envelope; GO:0010319 stromule; GO:0016020 membrane; GO:0031090 organelle membrane; GO:00…	GO:0003824 catalytic activity; GO:0004364 glutathione transferase activity; GO:0005488 binding; GO:0016740 transferase activity; GO:0016765 transferase activity, transferring alkyl or aryl (other than methyl) groups; GO:0033218 amide binding; GO:0042277 peptide binding; GO:0043167 ion binding; GO:0043168 anion binding; GO:0043295 glutathione binding; GO:0048037 cofactor binding; GO:0072341 modifi…	PF02798; PF00043	Glutathione S-transferase, N-terminal domain; Glutathione S-transferase, C-terminal domain	O	KOG0867	Glutathione S-transferase
TRINITY_DN11512_c0_g3_m.1044	SNF1-related protein kinase regulatory subunit gamma-1-like OS=Arabidopsis thaliana OX=3702 GN=CBSCBS2 PE=1 SV=1	CBSCBS2	2.4688	0.000815854	Up	47.476	27.1	9	9	0.422477	0.594818	0.52353	1.2366	1.28063	1.28672	1.23133	1.25818	1.16572	plasma membrane							PF00571	CBS domain	C	KOG1764	5'-AMP-activated protein kinase, gamma subunit
TRINITY_DN116_c0_g2_m.1162	UDP-glycosyltransferase 92A1 OS=Arabidopsis thaliana OX=3702 GN=UGT92A1 PE=2 SV=1	UGT92A1	2.2394	3.72356e-05	Up	54.51	25.8	8	8	0.271364	0.294374	0.307798	0.642614	0.639707	0.67387	1.85017	2.16855	2.15156	chloroplast					GO:0005622 intracellular; GO:0005623 cell; GO:0043226 organelle; GO:0043227 membrane-bounded organelle; GO:0043229 intracellular organelle; GO:0043231 intracellular membrane-bounded organelle;	GO:0003824 catalytic activity; GO:0008194 UDP-glycosyltransferase activity; GO:0016740 transferase activity; GO:0016757 transferase activity, transferring glycosyl groups; GO:0016758 transferase activity, transferring hexosyl groups; GO:0035251 UDP-glucosyltransferase activity; GO:0046527 glucosyltransferase activity; GO:0080043 quercetin 3-O-glucosyltransferase activity; GO:0080044 quercetin 7-O…			G	KOG1192	UDP-glucuronosyl and UDP-glucosyl transferase
TRINITY_DN1167_c0_g1_m.1146	Germin-like protein subfamily 1 member 16 OS=Arabidopsis thaliana OX=3702 GN=At5g39130 PE=2 SV=1	At5g39130	0.5767	0.00302638	Down	25.157	74.5	10	10	0.927883	0.917547	0.898856	0.442765	0.589954	0.549881	1.4861	1.58082	1.60619	chloroplast					GO:0005618 cell wall; GO:0005623 cell; GO:0030312 external encapsulating structure; GO:0071944 cell periphery;		PF00190	Cupin
TRINITY_DN117_c0_g1_m.1221	Cationic peroxidase 2 OS=Arachis hypogaea OX=3818 GN=PNC2 PE=2 SV=1	PNC2	1.5188	0.00175235	Up	35.575	43.4	8	8	0.788859	0.922562	0.809651	1.31089	1.31472	1.20342	0.908835	0.80161	0.939451	chloroplast	K00430	E1.11.1.7; peroxidase [EC:1.11.1.7]	map00940 Phenylpropanoid biosynthesis; map01100 Metabolic pathways; map01110 Biosynthesis of secondary metabolites				PF00141	Peroxidase
TRINITY_DN11783_c0_g1_m.1206	uncharacterized protein LOC21397334 [Morus notabilis]	--	0.5968	2.56729e-05	Down	25.054	12.7	3	3	1.37402	1.48247	1.45818	0.862045	0.862558	0.850319	0.68329	0.727354	0.699763	chloroplast	K14009	BCAP31, BAP31; B-cell receptor-associated protein 31	map04141 Protein processing in endoplasmic reticulum	GO:0000003 reproduction; GO:0006810 transport; GO:0006873 cellular ion homeostasis; GO:0006874 cellular calcium ion homeostasis; GO:0006875 cellular metal ion homeostasis; GO:0006888 endoplasmic reticulum to Golgi vesicle-mediated transport; GO:0007154 cell communication; GO:0007165 signal transduction; GO:0007204 positive regulation of cytosolic calcium ion concentration; GO:0007276 gamete gener…	GO:0000139 Golgi membrane; GO:0005622 intracellular; GO:0005623 cell; GO:0005737 cytoplasm; GO:0005783 endoplasmic reticulum; GO:0005789 endoplasmic reticulum membrane; GO:0005794 Golgi apparatus; GO:0005795 Golgi stack; GO:0005811 lipid droplet; GO:0005886 plasma membrane; GO:0005887 integral component of plasma membrane; GO:0012505 endomembrane system; GO:0016020 membrane; GO:0016021 integral c…	GO:0005102 signaling receptor binding; GO:0005488 binding; GO:0005515 protein binding; GO:0042287 MHC protein binding; GO:0042288 MHC class I protein binding; GO:0044877 protein-containing complex binding;			V	KOG1962	B-cell receptor-associated protein and related proteins
TRINITY_DN11800_c0_g1_m.1222	Protein STRUBBELIG-RECEPTOR FAMILY 3 OS=Arabidopsis thaliana OX=3702 GN=SRF3 PE=1 SV=1	SRF3	0.6148	0.0433615	Down	86.802	4.1	2	2	1.02527	1.44971	1.0715	0.732861	0.720655					plasma membrane				GO:0006464 cellular protein modification process; GO:0006468 protein phosphorylation; GO:0006793 phosphorus metabolic process; GO:0006796 phosphate-containing compound metabolic process; GO:0006807 nitrogen compound metabolic process; GO:0007154 cell communication; GO:0007165 signal transduction; GO:0007166 cell surface receptor signaling pathway; GO:0007167 enzyme linked receptor protein signali…	GO:0005623 cell; GO:0005886 plasma membrane; GO:0005911 cell-cell junction; GO:0009506 plasmodesma; GO:0016020 membrane; GO:0030054 cell junction; GO:0055044 symplast; GO:0071944 cell periphery;	GO:0003824 catalytic activity; GO:0004672 protein kinase activity; GO:0004674 protein serine/threonine kinase activity; GO:0004675 transmembrane receptor protein serine/threonine kinase activity; GO:0004888 transmembrane signaling receptor activity; GO:0016301 kinase activity; GO:0016740 transferase activity; GO:0016772 transferase activity, transferring phosphorus-containing groups; GO:0016773 p…	PF07714	Protein tyrosine kinase
TRINITY_DN11918_c0_g1_m.1282	Phosphomethylethanolamine N-methyltransferase OS=Arabidopsis thaliana OX=3702 GN=NMT2 PE=1 SV=2	NMT2	0.1996	0.0020727	Down	56.314	32.9	11	8	2.11309	1.87241	1.98698	0.421815	0.242527	0.527723	0.583901	0.601733	0.649825	cytoplasm	K05929	E2.1.1.103, NMT; phosphoethanolamine N-methyltransferase [EC:2.1.1.103]	map00564 Glycerophospholipid metabolism	GO:0000003 reproduction; GO:0000902 cell morphogenesis; GO:0000904 cell morphogenesis involved in differentiation; GO:0001505 regulation of neurotransmitter levels; GO:0003006 developmental process involved in reproduction; GO:0006576 cellular biogenic amine metabolic process; GO:0006629 lipid metabolic process; GO:0006644 phospholipid metabolic process; GO:0006650 glycerophospholipid metabolic p…	GO:0005622 intracellular; GO:0005623 cell; GO:0005737 cytoplasm; GO:0005829 cytosol;	GO:0003824 catalytic activity; GO:0008168 methyltransferase activity; GO:0008170 N-methyltransferase activity; GO:0008757 S-adenosylmethionine-dependent methyltransferase activity; GO:0016740 transferase activity; GO:0016741 transferase activity, transferring one-carbon groups; GO:0052667 phosphomethylethanolamine N-methyltransferase activity;	PF08241; PF13489	Methyltransferase domain; Methyltransferase domain	I	KOG1269	SAM-dependent methyltransferases
TRINITY_DN11923_c0_g1_m.1289	Biotin carboxyl carrier protein of acetyl-CoA carboxylase 2, chloroplastic OS=Arabidopsis thaliana OX=3702 GN=BCCP2 PE=1 SV=1	BCCP2	0.4523	0.000318959	Down	29.68	19.1	5	3	1.30469	1.57646	1.60765	0.684643	0.656882	0.688809	0.873754	0.81461	0.792495	chloroplast	K02160	accB, bccP; acetyl-CoA carboxylase biotin carboxyl carrier protein	map00061 Fatty acid biosynthesis; map00620 Pyruvate metabolism; map00640 Propanoate metabolism; map01100 Metabolic pathways; map01110 Biosynthesis of secondary metabolites; map01200 Carbon metabolism; map01212 Fatty acid metabolism		GO:0005622 intracellular; GO:0005623 cell; GO:0005737 cytoplasm; GO:0009507 chloroplast; GO:0009526 plastid envelope; GO:0009532 plastid stroma; GO:0009536 plastid; GO:0009570 chloroplast stroma; GO:0009941 chloroplast envelope; GO:0031967 organelle envelope; GO:0031975 envelope; GO:0043226 organelle; GO:0043227 membrane-bounded organelle; GO:0043229 intracellular organelle; GO:0043231 intracellu…		PF00364	Biotin-requiring enzyme
TRINITY_DN1193_c0_g1_m.1297	Serine/threonine-protein kinase tricorner OS=Drosophila pseudoobscura pseudoobscura OX=46245 GN=trc PE=3 SV=1	trc	0.5939	1.56258e-05	Down	62.978	20.5	10	9	1.52611	1.46907	1.43932	0.881649	0.857885	0.893905	0.612015	0.610686	0.709358	nucleus	K08790	STK38, NDR; serine/threonine kinase 38 [EC:2.7.11.1]		GO:0006464 cellular protein modification process; GO:0006468 protein phosphorylation; GO:0006793 phosphorus metabolic process; GO:0006796 phosphate-containing compound metabolic process; GO:0006807 nitrogen compound metabolic process; GO:0007154 cell communication; GO:0007165 signal transduction; GO:0007275 multicellular organism development; GO:0007399 nervous system development; GO:0008152 meta…	GO:0005622 intracellular; GO:0005623 cell; GO:0005634 nucleus; GO:0005737 cytoplasm; GO:0043226 organelle; GO:0043227 membrane-bounded organelle; GO:0043229 intracellular organelle; GO:0043231 intracellular membrane-bounded organelle;	GO:0000166 nucleotide binding; GO:0003824 catalytic activity; GO:0004672 protein kinase activity; GO:0004674 protein serine/threonine kinase activity; GO:0005488 binding; GO:0005524 ATP binding; GO:0008144 drug binding; GO:0016301 kinase activity; GO:0016740 transferase activity; GO:0016772 transferase activity, transferring phosphorus-containing groups; GO:0016773 phosphotransferase activity, al…	PF00069	Protein kinase domain	T	KOG0605	NDR and related serine/threonine kinases
TRINITY_DN1196_c0_g1_m.1317	ISWI chromatin-remodeling complex ATPase CHR11 OS=Arabidopsis thaliana OX=3702 GN=CHR11 PE=1 SV=4	CHR11	0.577	1.98921e-06	Down	126.25	20.7	18	18	1.48507	1.51355	1.55357	0.872237	0.877214	0.877044	0.630599	0.612109	0.578611	cytoplasm	K11654	SMARCA5, SNF2H, ISWI; SWI/SNF-related matrix-associated actin-dependent regulator of chromatin subfamily A member 5 [EC:3.6.4.-]		GO:0006323 DNA packaging; GO:0006325 chromatin organization; GO:0006333 chromatin assembly or disassembly; GO:0006996 organelle organization; GO:0007275 multicellular organism development; GO:0009553 embryo sac development; GO:0009561 megagametogenesis; GO:0009987 cellular process; GO:0016043 cellular component organization; GO:0016584 nucleosome positioning; GO:0022607 cellular component assembl…	GO:0005622 intracellular; GO:0005623 cell; GO:0005634 nucleus; GO:0043226 organelle; GO:0043227 membrane-bounded organelle; GO:0043229 intracellular organelle; GO:0043231 intracellular membrane-bounded organelle;		PF09110; PF09111	HAND; SLIDE	K	KOG0385	Chromatin remodeling complex WSTF-ISWI, small subunit
TRINITY_DN11997_c1_g1_m.1337	Glutamyl-tRNA(Gln) amidotransferase subunit A OS=Carboxydothermus hydrogenoformans (strain ATCC BAA-161 / DSM 6008 / Z-2901) OX=246194 GN=gatA PE=3 SV=1	gatA	0.5014	0.000294555	Down	67.667	13.5	6	6	1.34052	1.4072	1.25104	0.608476	0.713792	0.682884	0.992888	0.866822	1.13637	extracellular									J	KOG1211	Amidases
TRINITY_DN1200_c0_g1_m.1365	uncharacterized protein LOC21386776 [Morus notabilis]	--	1.5082	1.61624e-05	Up	41.036	33.6	10	10	0.701663	0.694086	0.665031	1.04268	1.03429	1.03107	1.26625	1.28933	1.2756	chloroplast	K17338	REEP1_2_3_4; receptor expression-enhancing protein 1/2/3/4					PF13499	EF-hand domain pair
TRINITY_DN1204_c0_g1_m.1386	Disease resistance RPP13-like protein 4 OS=Arabidopsis thaliana OX=3702 GN=RPP13L4 PE=1 SV=2	RPP13L4	1.6891	2.13286e-08	Up	98.163	58.7	53	53	0.65719	0.661284	0.653031	1.11222	1.11175	1.10601	1.24839	1.23277	1.21734	nucleus				GO:0006950 response to stress; GO:0006952 defense response; GO:0007154 cell communication; GO:0007165 signal transduction; GO:0009605 response to external stimulus; GO:0009607 response to biotic stimulus; GO:0009617 response to bacterium; GO:0009987 cellular process; GO:0023052 signaling; GO:0042742 defense response to bacterium; GO:0043207 response to external biotic stimulus; GO:0050789 regulat…	GO:0005623 cell; GO:0005886 plasma membrane; GO:0016020 membrane; GO:0071944 cell periphery;	GO:0005488 binding; GO:0005515 protein binding; GO:0043621 protein self-association;	PF00931	NB-ARC domain	T	KOG4658	Apoptotic ATPase
TRINITY_DN1205_c0_g1_m.1394	Formate dehydrogenase, mitochondrial OS=Solanum tuberosum OX=4113 GN=FDH1 PE=1 SV=2	FDH1	1.5274	4.85492e-06	Up	42.147	66.3	20	20	0.669751	0.694181	0.678843	1.03203	1.05517	1.03285	1.2549	1.2804	1.30188	mitochondria	K00122	FDH; formate dehydrogenase [EC:1.17.1.9]	map00630 Glyoxylate and dicarboxylate metabolism; map01100 Metabolic pathways; map01200 Carbon metabolism	GO:0010035 response to inorganic substance; GO:0010038 response to metal ion; GO:0042221 response to chemical; GO:0046686 response to cadmium ion; GO:0050896 response to stimulus;	GO:0005622 intracellular; GO:0005623 cell; GO:0005737 cytoplasm; GO:0005739 mitochondrion; GO:0009507 chloroplast; GO:0009536 plastid; GO:0009579 thylakoid; GO:0043226 organelle; GO:0043227 membrane-bounded organelle; GO:0043229 intracellular organelle; GO:0043231 intracellular membrane-bounded organelle;		PF00389; PF02826	D-isomer specific 2-hydroxyacid dehydrogenase, catalytic domain; D-isomer specific 2-hydroxyacid dehydrogenase, NAD binding domain	C	KOG0069	Glyoxylate/hydroxypyruvate reductase (D-isomer-specific 2-hydroxy acid dehydrogenase superfamily)
TRINITY_DN1206_c0_g1_m.1399	Probable pectin methyltransferase QUA2 OS=Arabidopsis thaliana OX=3702 GN=QUA2 PE=1 SV=2	QUA2	0.5844	0.00325139	Down	73.666	18.5	7	7	1.43681	1.21288	1.37881	0.895937	0.734895	0.723361	0.755787	1.00389	0.85763	nucleus				GO:0000271 polysaccharide biosynthetic process; GO:0005975 carbohydrate metabolic process; GO:0005976 polysaccharide metabolic process; GO:0007275 multicellular organism development; GO:0008152 metabolic process; GO:0009058 biosynthetic process; GO:0009059 macromolecule biosynthetic process; GO:0009664 plant-type cell wall organization; GO:0009719 response to endogenous stimulus; GO:0009725 respo…	GO:0005622 intracellular; GO:0005623 cell; GO:0005737 cytoplasm; GO:0005768 endosome; GO:0005794 Golgi apparatus; GO:0005802 trans-Golgi network; GO:0012505 endomembrane system; GO:0031410 cytoplasmic vesicle; GO:0031982 vesicle; GO:0031984 organelle subcompartment; GO:0043226 organelle; GO:0043227 membrane-bounded organelle; GO:0043229 intracellular organelle; GO:0043231 intracellular membrane-b…	GO:0003824 catalytic activity; GO:0008168 methyltransferase activity; GO:0008757 S-adenosylmethionine-dependent methyltransferase activity; GO:0016740 transferase activity; GO:0016741 transferase activity, transferring one-carbon groups;
TRINITY_DN121_c1_g1_m.1524	Proline-rich receptor-like protein kinase PERK8 OS=Arabidopsis thaliana OX=3702 GN=PERK8 PE=1 SV=1	PERK8	0.3537	0.00164629	Down	80.561	6.8	3	3	1.50577	1.43497	1.53967	0.463318	0.593134		0.654956		0.808173	chloroplast				GO:0006464 cellular protein modification process; GO:0006468 protein phosphorylation; GO:0006793 phosphorus metabolic process; GO:0006796 phosphate-containing compound metabolic process; GO:0006807 nitrogen compound metabolic process; GO:0007154 cell communication; GO:0007165 signal transduction; GO:0007166 cell surface receptor signaling pathway; GO:0007167 enzyme linked receptor protein signali…	GO:0005623 cell; GO:0005886 plasma membrane; GO:0016020 membrane; GO:0071944 cell periphery;	GO:0003824 catalytic activity; GO:0004672 protein kinase activity; GO:0004674 protein serine/threonine kinase activity; GO:0004675 transmembrane receptor protein serine/threonine kinase activity; GO:0004888 transmembrane signaling receptor activity; GO:0005488 binding; GO:0005515 protein binding; GO:0016301 kinase activity; GO:0016740 transferase activity; GO:0016772 transferase activity, transfe…	PF07714	Protein tyrosine kinase	T	KOG1187	Serine/threonine protein kinase
TRINITY_DN121_c10_g1_m.1517	AT-hook motif nuclear-localized protein 20 OS=Arabidopsis thaliana OX=3702 GN=AHL20 PE=2 SV=1	AHL20	0.4719	0.000187571	Down	29.605	16.8	3	2	1.2767	1.25333	1.18507	0.543062	0.645387	0.5647	1.39835	1.0303	1.1031	nucleus				GO:0002682 regulation of immune system process; GO:0002683 negative regulation of immune system process; GO:0006355 regulation of transcription, DNA-templated; GO:0006950 response to stress; GO:0006952 defense response; GO:0009605 response to external stimulus; GO:0009607 response to biotic stimulus; GO:0009620 response to fungus; GO:0009889 regulation of biosynthetic process; GO:0010468 regulati…	GO:0005622 intracellular; GO:0005623 cell; GO:0005634 nucleus; GO:0043226 organelle; GO:0043227 membrane-bounded organelle; GO:0043229 intracellular organelle; GO:0043231 intracellular membrane-bounded organelle;	GO:0003676 nucleic acid binding; GO:0003677 DNA binding; GO:0003680 AT DNA binding; GO:0003690 double-stranded DNA binding; GO:0003700 DNA-binding transcription factor activity; GO:0005488 binding; GO:0043565 sequence-specific DNA binding; GO:0097159 organic cyclic compound binding; GO:0140110 transcription regulator activity; GO:1901363 heterocyclic compound binding; GO:1990837 sequence-specific…	PF03479	Domain of unknown function (DUF296)
TRINITY_DN1212_c2_g2_m.1447	uncharacterized protein LOC21393047 [Morus notabilis]	--	0.6354	6.14321e-05	Down	42.485	16.4	4	4	1.20447	1.17376	1.22014	0.743528	0.797822	0.745022	1.0476	1.08433	0.983333	plasma membrane							PF09459	Ethylbenzene dehydrogenase
TRINITY_DN12176_c0_g1_m.1486	LIM domain-containing protein WLIM1 OS=Arabidopsis thaliana OX=3702 GN=WLIM1 PE=1 SV=1	WLIM1	0.1169	0.00162709	Down	22.003	43.4	6	6	2.31791	2.34753	2.1771	0.138859	0.300743	0.360377		0.196023	0.161465	chloroplast	K09377	CSRP; cysteine and glycine-rich protein		GO:0006996 organelle organization; GO:0007010 cytoskeleton organization; GO:0007015 actin filament organization; GO:0009987 cellular process; GO:0016043 cellular component organization; GO:0022607 cellular component assembly; GO:0030029 actin filament-based process; GO:0030036 actin cytoskeleton organization; GO:0044085 cellular component biogenesis; GO:0051017 actin filament bundle assembly; GO:…	GO:0005623 cell; GO:0005886 plasma membrane; GO:0016020 membrane; GO:0071944 cell periphery;	GO:0003676 nucleic acid binding; GO:0003723 RNA binding; GO:0003729 mRNA binding; GO:0003779 actin binding; GO:0005488 binding; GO:0005515 protein binding; GO:0008092 cytoskeletal protein binding; GO:0044877 protein-containing complex binding; GO:0051015 actin filament binding; GO:0097159 organic cyclic compound binding; GO:1901363 heterocyclic compound binding;	PF00412	LIM domain	TZ	KOG1700	Regulatory protein MLP and related LIM proteins
TRINITY_DN1223_c1_g1_m.1561	NAP1-related protein 2 OS=Arabidopsis thaliana OX=3702 GN=NRP2 PE=1 SV=2	NRP2	0.6476	0.00501647	Down	31.228	21.7	4	3	1.45383	1.11678	1.28884	0.824027	0.828704	0.846558	0.966857	0.722896	0.95151	cytoplasm	K11290	SET, TAF1, I2PP2A; template-activating factor I		GO:0006139 nucleobase-containing compound metabolic process; GO:0006259 DNA metabolic process; GO:0006260 DNA replication; GO:0006323 DNA packaging; GO:0006325 chromatin organization; GO:0006333 chromatin assembly or disassembly; GO:0006334 nucleosome assembly; GO:0006337 nucleosome disassembly; GO:0006355 regulation of transcription, DNA-templated; GO:0006725 cellular aromatic compound metabolic…	GO:0005622 intracellular; GO:0005623 cell; GO:0005634 nucleus; GO:0005654 nucleoplasm; GO:0005737 cytoplasm; GO:0005783 endoplasmic reticulum; GO:0005811 lipid droplet; GO:0005829 cytosol; GO:0012505 endomembrane system; GO:0031974 membrane-enclosed lumen; GO:0031981 nuclear lumen; GO:0032991 protein-containing complex; GO:0043226 organelle; GO:0043227 membrane-bounded organelle; GO:0043228 non-m…	GO:0004857 enzyme inhibitor activity; GO:0004864 protein phosphatase inhibitor activity; GO:0005488 binding; GO:0005515 protein binding; GO:0019208 phosphatase regulator activity; GO:0019212 phosphatase inhibitor activity; GO:0019888 protein phosphatase regulator activity; GO:0030234 enzyme regulator activity; GO:0042393 histone binding; GO:0098772 molecular function regulator;			L	KOG1508	DNA replication factor/protein phosphatase inhibitor SET/SPR-2
TRINITY_DN1226_c2_g1_m.1581	ATPase family AAA domain-containing protein At1g05910 OS=Arabidopsis thaliana OX=3702 GN=At1g05910 PE=2 SV=1	At1g05910	0.5974	0.0350743	Down	95.306	5.6	3	3	1.46985	1.49262	1.19623	0.617133	0.812226	1.05489	0.798408	0.770354	0.788294	nucleus	K22531	ATAD2; ATPase family AAA domain-containing protein 2 [EC:3.6.1.-]		GO:0006139 nucleobase-containing compound metabolic process; GO:0006259 DNA metabolic process; GO:0006304 DNA modification; GO:0006355 regulation of transcription, DNA-templated; GO:0006357 regulation of transcription by RNA polymerase II; GO:0006725 cellular aromatic compound metabolic process; GO:0006807 nitrogen compound metabolic process; GO:0008152 metabolic process; GO:0009889 regulation of…	GO:0005622 intracellular; GO:0005623 cell; GO:0005634 nucleus; GO:0043226 organelle; GO:0043227 membrane-bounded organelle; GO:0043229 intracellular organelle; GO:0043231 intracellular membrane-bounded organelle;	GO:0003682 chromatin binding; GO:0003824 catalytic activity; GO:0005488 binding; GO:0005515 protein binding; GO:0016462 pyrophosphatase activity; GO:0016787 hydrolase activity; GO:0016817 hydrolase activity, acting on acid anhydrides; GO:0016818 hydrolase activity, acting on acid anhydrides, in phosphorus-containing anhydrides; GO:0016887 ATPase activity; GO:0017111 nucleoside-triphosphatase acti…	PF00004	ATPase family associated with various cellular activities (AAA)	O	KOG0732	AAA+-type ATPase containing the bromodomain
TRINITY_DN1245_c0_g1_m.1664	Uncharacterized protein At2g37660, chloroplastic OS=Arabidopsis thaliana OX=3702 GN=At2g37660 PE=1 SV=2	At2g37660	1.568	1.11899e-05	Up	34.591	52.3	10	10	0.820687	0.833109	0.840504	1.26959	1.30354	1.33789	0.828431	0.870625	0.895626	chloroplast	K08956	AFG3; AFG3 family protein [EC:3.4.24.-]		GO:0006950 response to stress; GO:0006952 defense response; GO:0009605 response to external stimulus; GO:0009607 response to biotic stimulus; GO:0009617 response to bacterium; GO:0042742 defense response to bacterium; GO:0043207 response to external biotic stimulus; GO:0050896 response to stimulus; GO:0051704 multi-organism process; GO:0051707 response to other organism; GO:0098542 defense respon…	GO:0005576 extracellular region; GO:0005622 intracellular; GO:0005623 cell; GO:0005737 cytoplasm; GO:0009507 chloroplast; GO:0009532 plastid stroma; GO:0009536 plastid; GO:0009570 chloroplast stroma; GO:0009579 thylakoid; GO:0043226 organelle; GO:0043227 membrane-bounded organelle; GO:0043229 intracellular organelle; GO:0043231 intracellular membrane-bounded organelle; GO:0048046 apoplast;	GO:0005488 binding; GO:0005507 copper ion binding; GO:0043167 ion binding; GO:0043169 cation binding; GO:0046872 metal ion binding; GO:0046914 transition metal ion binding;	PF13460	NADH(P)-binding	G	KOG1203	Predicted dehydrogenase
TRINITY_DN1245_c1_g3_m.1666	Patellin-6 OS=Arabidopsis thaliana OX=3702 GN=PATL6 PE=2 SV=1	PATL6	0.6568	9.45053e-05	Down	47.691	34.8	10	10	1.4914	1.4335	1.46711	0.919497	0.999011	0.966143	0.553299	0.574458	0.595589	nucleus					GO:0005623 cell; GO:0005886 plasma membrane; GO:0016020 membrane; GO:0071944 cell periphery;		PF03765; PF00650	CRAL/TRIO, N-terminal domain; CRAL/TRIO domain	I	KOG1471	Phosphatidylinositol transfer protein SEC14 and related proteins
TRINITY_DN1246_c1_g1_m.1670	Probable galactinol--sucrose galactosyltransferase 6 OS=Arabidopsis thaliana OX=3702 GN=RFS6 PE=2 SV=2	RFS6	0.6087	0.0013624	Down	70.681	24.8	13	11	1.31042	1.38524	1.30669	0.911088	0.750906	0.774285	0.917398	0.807158	0.836807	chloroplast	K06617	E2.4.1.82; raffinose synthase [EC:2.4.1.82]	map00052 Galactose metabolism; map01100 Metabolic pathways
TRINITY_DN1246_c1_g1_m.1671	Probable galactinol--sucrose galactosyltransferase 6 OS=Arabidopsis thaliana OX=3702 GN=RFS6 PE=2 SV=2	RFS6	0.4694	0.00101284	Down	31.708	17.4	4	4	1.48387	1.70124	1.53052	0.847793	0.647768	0.717842	0.594058	0.86716	0.60974	cytoplasm	K06617	E2.4.1.82; raffinose synthase [EC:2.4.1.82]	map00052 Galactose metabolism; map01100 Metabolic pathways
TRINITY_DN1248_c0_g1_m.1677	Callose synthase 3 OS=Arabidopsis thaliana OX=3702 GN=CALS3 PE=3 SV=3	CALS3	0.6287	0.000222411	Down	225.72	10.3	17	13	1.51341	1.44725	1.36866	0.94181	0.872284	0.907887	0.606367	0.586447	0.755884	plasma membrane	K11000	CALS; callose synthase [EC:2.4.1.-]		GO:0000003 reproduction; GO:0000271 polysaccharide biosynthetic process; GO:0000902 cell morphogenesis; GO:0000904 cell morphogenesis involved in differentiation; GO:0001558 regulation of cell growth; GO:0003006 developmental process involved in reproduction; GO:0005975 carbohydrate metabolic process; GO:0005976 polysaccharide metabolic process; GO:0006073 cellular glucan metabolic process; GO:00…	GO:0005622 intracellular; GO:0005623 cell; GO:0005737 cytoplasm; GO:0005886 plasma membrane; GO:0005911 cell-cell junction; GO:0009504 cell plate; GO:0009506 plasmodesma; GO:0016020 membrane; GO:0030054 cell junction; GO:0055044 symplast; GO:0071944 cell periphery;	GO:0003824 catalytic activity; GO:0003843 1,3-beta-D-glucan synthase activity; GO:0008194 UDP-glycosyltransferase activity; GO:0016740 transferase activity; GO:0016757 transferase activity, transferring glycosyl groups; GO:0016758 transferase activity, transferring hexosyl groups; GO:0035251 UDP-glucosyltransferase activity; GO:0046527 glucosyltransferase activity;			M	KOG0916	1,3-beta-glucan synthase/callose synthase catalytic subunit
TRINITY_DN4667_c0_g2_m.12544	V-type proton ATPase 16 kDa proteolipid subunit OS=Gossypium hirsutum OX=3635 GN=CVA16-2 PE=2 SV=1	CVA16-2	0.6525	1.02133e-05	Down	16.659	10.9	1	1	1.19346	1.15529	1.16449	0.755829	0.754042	0.782483	1.04364	1.1093	1.04146	vacuolar membrane	K02155	ATPeV0C, ATP6L; V-type H+-transporting ATPase 16kDa proteolipid subunit	map00190 Oxidative phosphorylation; map01100 Metabolic pathways; map04145 Phagosome		GO:0005622 intracellular; GO:0005623 cell; GO:0005737 cytoplasm; GO:0005773 vacuole; GO:0005774 vacuolar membrane; GO:0016020 membrane; GO:0031090 organelle membrane; GO:0043226 organelle; GO:0043227 membrane-bounded organelle; GO:0043229 intracellular organelle; GO:0043231 intracellular membrane-bounded organelle; GO:0098588 bounding membrane of organelle; GO:0098805 whole membrane;				C	KOG0232	Vacuolar H+-ATPase V0 sector, subunits c/c'
TRINITY_DN12558_c0_g1_m.1713	LEAF RUST 10 DISEASE-RESISTANCE LOCUS RECEPTOR-LIKE PROTEIN KINASE-like 2.5 OS=Arabidopsis thaliana OX=3702 GN=LRK10L-2.5 PE=3 SV=1	LRK10L-2.5	0.2158	0.000140733	Down	72.676	6.7	3	3	1.68858	1.71759	1.52873	0.422416	0.345599	0.297088				vacuolar membrane	K04733	IRAK4; interleukin-1 receptor-associated kinase 4 [EC:2.7.11.1]					PF14380; PF00069	Wall-associated receptor kinase C-terminal; Protein kinase domain	T	KOG1187	Serine/threonine protein kinase
TRINITY_DN126_c0_g2_m.1805	Probable E3 ubiquitin-protein ligase ARI8 OS=Arabidopsis thaliana OX=3702 GN=ARI8 PE=2 SV=1	ARI8	1.6662	0.000935195	Up	67.659	11.7	5	4	0.714959	0.690504	0.612258	1.05659	1.1911	1.11433	1.24581	1.16252	1.21192	nucleus	K11968	ARIH1; ariadne-1 [EC:2.3.2.31]		GO:0000209 protein polyubiquitination; GO:0006464 cellular protein modification process; GO:0006807 nitrogen compound metabolic process; GO:0008152 metabolic process; GO:0009893 positive regulation of metabolic process; GO:0009894 regulation of catabolic process; GO:0009896 positive regulation of catabolic process; GO:0009987 cellular process; GO:0010604 positive regulation of macromolecule metab…	GO:0000151 ubiquitin ligase complex; GO:0005622 intracellular; GO:0005623 cell; GO:0005737 cytoplasm; GO:0032991 protein-containing complex; GO:1902494 catalytic complex; GO:1990234 transferase complex;	GO:0003824 catalytic activity; GO:0004842 ubiquitin-protein transferase activity; GO:0005488 binding; GO:0005515 protein binding; GO:0016740 transferase activity; GO:0019787 ubiquitin-like protein transferase activity; GO:0019899 enzyme binding; GO:0031624 ubiquitin conjugating enzyme binding; GO:0044390 ubiquitin-like protein conjugating enzyme binding; GO:0061630 ubiquitin protein ligase activi…	PF01485	IBR domain	O	KOG1815	Predicted E3 ubiquitin ligase
TRINITY_DN12646_c0_g1_m.1763	Fatty acid-binding protein homolog 4 OS=Caenorhabditis elegans OX=6239 GN=lbp-4 PE=3 SV=1	lbp-4	0.2435	0.000210591	Down	21.038	26.2	3	3	1.41019	1.43866	1.55212	0.434465	0.332683	0.304642	1.43976	0.919469	1.16801	vacuolar membrane				GO:0003008 system process; GO:0006082 organic acid metabolic process; GO:0006629 lipid metabolic process; GO:0006631 fatty acid metabolic process; GO:0006638 neutral lipid metabolic process; GO:0006639 acylglycerol metabolic process; GO:0006641 triglyceride metabolic process; GO:0006810 transport; GO:0006811 ion transport; GO:0006820 anion transport; GO:0006869 lipid transport; GO:0007586 digesti…	GO:0005622 intracellular; GO:0005623 cell; GO:0005737 cytoplasm; GO:0005829 cytosol; GO:0005886 plasma membrane; GO:0005902 microvillus; GO:0005938 cell cortex; GO:0016020 membrane; GO:0042995 cell projection; GO:0045177 apical part of cell; GO:0045179 apical cortex; GO:0071944 cell periphery; GO:0098858 actin-based cell projection; GO:0099568 cytoplasmic region; GO:0099738 cell cortex region; GO…	GO:0005215 transporter activity; GO:0005319 lipid transporter activity; GO:0005324 long-chain fatty acid transporter activity; GO:0005488 binding; GO:0005504 fatty acid binding; GO:0008289 lipid binding; GO:0031406 carboxylic acid binding; GO:0033293 monocarboxylic acid binding; GO:0036041 long-chain fatty acid binding; GO:0036094 small molecule binding; GO:0043167 ion binding; GO:0043168 anion b…			H	KOG4015	Fatty acid-binding protein FABP
TRINITY_DN12656_c0_g1_m.1765	Protein NAP1 OS=Arabidopsis thaliana OX=3702 GN=NAP1 PE=1 SV=2	NAP1	0.6307	5.36384e-06	Down	154.56	15.1	13	13	1.3414	1.37612	1.40599	0.873392	0.861223	0.866201	0.727287	0.743753	0.804637	nucleus	K05750	NCKAP1, NAP125; NCK-associated protein 1		GO:0000902 cell morphogenesis; GO:0000904 cell morphogenesis involved in differentiation; GO:0006355 regulation of transcription, DNA-templated; GO:0006996 organelle organization; GO:0007010 cytoskeleton organization; GO:0007015 actin filament organization; GO:0008064 regulation of actin polymerization or depolymerization; GO:0009653 anatomical structure morphogenesis; GO:0009825 multidimensional…	GO:0005622 intracellular; GO:0005623 cell; GO:0005634 nucleus; GO:0005737 cytoplasm; GO:0005783 endoplasmic reticulum; GO:0005789 endoplasmic reticulum membrane; GO:0012505 endomembrane system; GO:0016020 membrane; GO:0031209 SCAR complex; GO:0031984 organelle subcompartment; GO:0032991 protein-containing complex; GO:0042175 nuclear outer membrane-endoplasmic reticulum membrane network; GO:004322…				FG	KOG1917	Membrane-associated hematopoietic protein
TRINITY_DN1270_c0_g1_m.1812	Protein C2-DOMAIN ABA-RELATED 7 OS=Arabidopsis thaliana OX=3702 GN=CAR7 PE=1 SV=1	CAR7	3.2801	5.05255e-06	Up	21.862	40.1	6	6	0.520078	0.486175	0.462187	1.6289	1.56923	1.6185	0.864319	0.974184	0.876423	mitochondria				GO:0006810 transport; GO:0006886 intracellular protein transport; GO:0007275 multicellular organism development; GO:0008104 protein localization; GO:0009314 response to radiation; GO:0009416 response to light stimulus; GO:0009555 pollen development; GO:0009605 response to external stimulus; GO:0009606 tropism; GO:0009628 response to abiotic stimulus; GO:0009629 response to gravity; GO:0009630 gra…	GO:0005576 extracellular region; GO:0005622 intracellular; GO:0005623 cell; GO:0005634 nucleus; GO:0005737 cytoplasm; GO:0005773 vacuole; GO:0005794 Golgi apparatus; GO:0005886 plasma membrane; GO:0012505 endomembrane system; GO:0016020 membrane; GO:0043226 organelle; GO:0043227 membrane-bounded organelle; GO:0043229 intracellular organelle; GO:0043231 intracellular membrane-bounded organelle; GO…	GO:0005096 GTPase activator activity; GO:0005488 binding; GO:0005543 phospholipid binding; GO:0008047 enzyme activator activity; GO:0008289 lipid binding; GO:0030234 enzyme regulator activity; GO:0030695 GTPase regulator activity; GO:0043167 ion binding; GO:0043168 anion binding; GO:0060589 nucleoside-triphosphatase regulator activity; GO:0098772 molecular function regulator;	PF00168	C2 domain	S	KOG1030	Predicted Ca2+-dependent phospholipid-binding protein
TRINITY_DN12741_c0_g1_m.1841	uncharacterized protein LOC21386727 [Morus notabilis]	--	0.6136	0.0199505	Down	122.6	4.4	3	3	1.12334	1.13086	1.3947	0.736125	0.89468	0.608068	1.07291	1.08638	0.952927	plasma membrane
TRINITY_DN1276_c0_g2_m.1854	Beta-glucosidase 11 OS=Arabidopsis thaliana OX=3702 GN=BGLU11 PE=2 SV=2	BGLU11	1.6245	3.69079e-05	Up	47.67	29.3	9	8	0.715109	0.737193	0.689066	1.12702	1.16972	1.18185	1.10132	1.17667	1.10205	cytoplasm	K01188	E3.2.1.21; beta-glucosidase [EC:3.2.1.21]	map00460 Cyanoamino acid metabolism; map00500 Starch and sucrose metabolism; map00940 Phenylpropanoid biosynthesis; map01100 Metabolic pathways; map01110 Biosynthesis of secondary metabolites	GO:0008152 metabolic process; GO:0009628 response to abiotic stimulus; GO:0009812 flavonoid metabolic process; GO:0042440 pigment metabolic process; GO:0046283 anthocyanin-containing compound metabolic process; GO:0050896 response to stimulus; GO:0071704 organic substance metabolic process; GO:0080167 response to karrikin; GO:1901135 carbohydrate derivative metabolic process; GO:1901657 glycosyl …	GO:0005622 intracellular; GO:0005623 cell; GO:0005737 cytoplasm; GO:0005773 vacuole; GO:0005777 peroxisome; GO:0042579 microbody; GO:0043226 organelle; GO:0043227 membrane-bounded organelle; GO:0043229 intracellular organelle; GO:0043231 intracellular membrane-bounded organelle;	GO:0003824 catalytic activity; GO:0004553 hydrolase activity, hydrolyzing O-glycosyl compounds; GO:0008422 beta-glucosidase activity; GO:0015926 glucosidase activity; GO:0016787 hydrolase activity; GO:0016798 hydrolase activity, acting on glycosyl bonds;	PF00232	Glycosyl hydrolase family 1	G	KOG0626	Beta-glucosidase, lactase phlorizinhydrolase, and related proteins
TRINITY_DN128_c0_g1_m.1922	Ribulose bisphosphate carboxylase/oxygenase activase 1, chloroplastic OS=Larrea tridentata OX=66636 GN=RCA1 PE=1 SV=1	RCA1	0.4057	2.71326e-06	Down	51.79	14.9	5	2	1.58043	1.56374	1.54314	0.618947	0.620211	0.662609	0.854499	0.767835	0.788595	chloroplast					GO:0005622 intracellular; GO:0005623 cell; GO:0005737 cytoplasm; GO:0009507 chloroplast; GO:0009532 plastid stroma; GO:0009536 plastid; GO:0009570 chloroplast stroma; GO:0043226 organelle; GO:0043227 membrane-bounded organelle; GO:0043229 intracellular organelle; GO:0043231 intracellular membrane-bounded organelle;		PF00004	ATPase family associated with various cellular activities (AAA)	O	KOG0651	26S proteasome regulatory complex, ATPase RPT4
TRINITY_DN1282_c2_g1_m.1901	Uricase-2 OS=Phaseolus vulgaris OX=3885 GN=URIII PE=1 SV=2	URIII	1.5888	5.16759e-06	Up	34.897	69.4	20	20	0.627532	0.626445	0.630095	0.976161	1.0241	0.993237	1.33571	1.39349	1.39323	peroxisome	K00365	uaZ; urate oxidase [EC:1.7.3.3]	map00230 Purine metabolism; map00232 Caffeine metabolism; map01100 Metabolic pathways	GO:0006996 organelle organization; GO:0007031 peroxisome organization; GO:0008152 metabolic process; GO:0009987 cellular process; GO:0016043 cellular component organization; GO:0055114 oxidation-reduction process; GO:0071840 cellular component organization or biogenesis;	GO:0005622 intracellular; GO:0005623 cell; GO:0005737 cytoplasm; GO:0005777 peroxisome; GO:0042579 microbody; GO:0043226 organelle; GO:0043227 membrane-bounded organelle; GO:0043229 intracellular organelle; GO:0043231 intracellular membrane-bounded organelle;	GO:0003824 catalytic activity; GO:0004846 urate oxidase activity; GO:0016491 oxidoreductase activity; GO:0016661 oxidoreductase activity, acting on other nitrogenous compounds as donors; GO:0016663 oxidoreductase activity, acting on other nitrogenous compounds as donors, oxygen as acceptor;	PF01014	Uricase	Q	KOG1599	Uricase (urate oxidase)
TRINITY_DN1294_c0_g1_m.1948	LysM domain-containing GPI-anchored protein 2 OS=Arabidopsis thaliana OX=3702 GN=LYM2 PE=1 SV=1	LYM2	1.8165	0.0076833	Up	38.032	11.2	3	3	0.628221	0.536877	0.712344	1.27833	1.17972	0.95229	1.44706	1.04998	1.21518	chloroplast					GO:0005623 cell; GO:0005886 plasma membrane; GO:0005911 cell-cell junction; GO:0009506 plasmodesma; GO:0016020 membrane; GO:0030054 cell junction; GO:0031224 intrinsic component of membrane; GO:0031225 anchored component of membrane; GO:0031226 intrinsic component of plasma membrane; GO:0046658 anchored component of plasma membrane; GO:0055044 symplast; GO:0071944 cell periphery;	GO:0005488 binding; GO:0008061 chitin binding; GO:0008144 drug binding; GO:0097367 carbohydrate derivative binding;	PF01476	LysM domain
TRINITY_DN1301_c0_g1_m.1987	Plasma membrane ATPase 4 OS=Nicotiana plumbaginifolia OX=4092 GN=PMA4 PE=2 SV=1	PMA4	0.6385	9.05913e-07	Down	105.38	38.6	33	17	1.22988	1.23426	1.22902	0.779374	0.778826	0.799823	1.02676	0.97581	0.946251	plasma membrane	K01535	PMA1, PMA2; H+-transporting ATPase [EC:7.1.2.1]	map00190 Oxidative phosphorylation; map01100 Metabolic pathways	GO:0001101 response to acid chemical; GO:0006810 transport; GO:0006811 ion transport; GO:0006812 cation transport; GO:0006950 response to stress; GO:0009414 response to water deprivation; GO:0009415 response to water; GO:0009628 response to abiotic stimulus; GO:0009719 response to endogenous stimulus; GO:0009725 response to hormone; GO:0009737 response to abscisic acid; GO:0009987 cellular proces…	GO:0005622 intracellular; GO:0005623 cell; GO:0005634 nucleus; GO:0005737 cytoplasm; GO:0005773 vacuole; GO:0005774 vacuolar membrane; GO:0005794 Golgi apparatus; GO:0005886 plasma membrane; GO:0005911 cell-cell junction; GO:0009506 plasmodesma; GO:0012505 endomembrane system; GO:0016020 membrane; GO:0016021 integral component of membrane; GO:0030054 cell junction; GO:0031090 organelle membrane; …	GO:0000287 magnesium ion binding; GO:0003824 catalytic activity; GO:0005215 transporter activity; GO:0005488 binding; GO:0008324 cation transmembrane transporter activity; GO:0008553 proton-exporting ATPase activity, phosphorylative mechanism; GO:0015075 ion transmembrane transporter activity; GO:0015077 monovalent inorganic cation transmembrane transporter activity; GO:0015078 proton transmembra…	PF00690; PF00702	Cation transporter/ATPase, N-terminus; haloacid dehalogenase-like hydrolase	P	KOG0205	Plasma membrane H+-transporting ATPase
TRINITY_DN1306_c0_g3_m.2013	Late embryogenesis abundant protein D-29 OS=Gossypium hirsutum OX=3635 PE=3 SV=1	--	3.7066	1.32236e-06	Up	24.449	42.5	12	12	0.379394	0.38433	0.373985	1.47188	1.33918	1.40592	1.23448	1.17107	1.23976	extracellular
TRINITY_DN1309_c0_g3_m.2027	CBS domain-containing protein CBSCBSPB3 OS=Arabidopsis thaliana OX=3702 GN=CBSCBSPB3 PE=1 SV=1	CBSCBSPB3	0.4853	0.00707674	Down	58.547	25.8	8	8	1.68692	1.56311	1.54447	0.578933	0.806306	0.941529	0.577466	0.606659	0.694605	chloroplast							PF00571; PF00564	CBS domain; PB1 domain
TRINITY_DN1310_c0_g1_m.2039	Mitochondrial inner membrane protein OXA1 OS=Arabidopsis thaliana OX=3702 GN=OXA1 PE=2 SV=2	OXA1	0.5671	0.00466388	Down	47.542	7	2	2	1.43214	1.10295	1.51285	0.77722	0.75998	0.758327	0.656537			mitochondria	K03217	yidC, spoIIIJ, OXA1, ccfA; YidC/Oxa1 family membrane protein insertase	map03060 Protein export		GO:0005622 intracellular; GO:0005623 cell; GO:0005737 cytoplasm; GO:0005739 mitochondrion; GO:0005740 mitochondrial envelope; GO:0005743 mitochondrial inner membrane; GO:0016020 membrane; GO:0019866 organelle inner membrane; GO:0031090 organelle membrane; GO:0031966 mitochondrial membrane; GO:0031967 organelle envelope; GO:0031975 envelope; GO:0043226 organelle; GO:0043227 membrane-bounded organe…				OU	KOG1239	Inner membrane protein translocase involved in respiratory chain assembly
TRINITY_DN1318_c0_g1_m.2068	Lysosomal amino acid transporter 1 OS=Caenorhabditis elegans OX=6239 GN=laat-1 PE=1 SV=2	laat-1	2.4618	0.0311401	Up	44.069	5.6	2	2	0.644124	0.62121	0.62066	1.11044	2.40476	1.1278		0.471002		cytoplasm	K23678	PQLC2, SLC66A1, LAAT1; solute carrier family 66 (lysosomal lysine-arginine transporter), member 1							S	KOG2913	Predicted membrane protein
TRINITY_DN132_c0_g1_m.2141	Transcription factor MYB17 OS=Arabidopsis thaliana OX=3702 GN=MYB17 PE=1 SV=1	MYB17	0.631	0.000163978	Down	21.27	58.1	12	11	1.37512	1.36203	1.31074	0.858977	0.891375	0.803722	0.749025	0.798326	0.850683	nucleus					GO:0005622 intracellular; GO:0005623 cell; GO:0005737 cytoplasm; GO:0005773 vacuole; GO:0005886 plasma membrane; GO:0005911 cell-cell junction; GO:0009506 plasmodesma; GO:0016020 membrane; GO:0030054 cell junction; GO:0043226 organelle; GO:0043227 membrane-bounded organelle; GO:0043229 intracellular organelle; GO:0043231 intracellular membrane-bounded organelle; GO:0055044 symplast; GO:0071944 ce…
TRINITY_DN1324_c1_g1_m.2109	Probable methyltransferase PMT26 OS=Arabidopsis thaliana OX=3702 GN=At5g64030 PE=2 SV=1	At5g64030	0.6593	0.000676696	Down	65.647	17.3	8	5	1.43976	1.33371	1.43041	0.970459	0.859887	0.941084	0.61871	0.649371	0.756607	plasma membrane				GO:0008152 metabolic process; GO:0032259 methylation;	GO:0005622 intracellular; GO:0005623 cell; GO:0005737 cytoplasm; GO:0005768 endosome; GO:0005794 Golgi apparatus; GO:0005802 trans-Golgi network; GO:0012505 endomembrane system; GO:0031410 cytoplasmic vesicle; GO:0031982 vesicle; GO:0031984 organelle subcompartment; GO:0043226 organelle; GO:0043227 membrane-bounded organelle; GO:0043229 intracellular organelle; GO:0043231 intracellular membrane-b…	GO:0003824 catalytic activity; GO:0008168 methyltransferase activity; GO:0008757 S-adenosylmethionine-dependent methyltransferase activity; GO:0016740 transferase activity; GO:0016741 transferase activity, transferring one-carbon groups;
TRINITY_DN1324_c1_g1_m.2110	Probable methyltransferase PMT26 OS=Arabidopsis thaliana OX=3702 GN=At5g64030 PE=2 SV=1	At5g64030	0.6458	0.000407351	Down	26.042	40.4	7	7	1.3791	1.56651	1.44075	0.918214	0.964972	0.949465	0.547951	0.655739	0.577304	nucleus				GO:0008152 metabolic process; GO:0032259 methylation;	GO:0005622 intracellular; GO:0005623 cell; GO:0005737 cytoplasm; GO:0005768 endosome; GO:0005794 Golgi apparatus; GO:0005802 trans-Golgi network; GO:0012505 endomembrane system; GO:0031410 cytoplasmic vesicle; GO:0031982 vesicle; GO:0031984 organelle subcompartment; GO:0043226 organelle; GO:0043227 membrane-bounded organelle; GO:0043229 intracellular organelle; GO:0043231 intracellular membrane-b…	GO:0003824 catalytic activity; GO:0008168 methyltransferase activity; GO:0008757 S-adenosylmethionine-dependent methyltransferase activity; GO:0016740 transferase activity; GO:0016741 transferase activity, transferring one-carbon groups;
TRINITY_DN13287_c0_g1_m.2131	Homogentisate solanesyltransferase, chloroplastic OS=Arabidopsis thaliana OX=3702 GN=HST PE=1 SV=1	HST	0.32	0.00110319	Down	46.373	17.8	6	6	1.95807	1.57844	1.91852	0.542348	0.720062	0.483314	0.606783	0.623175	0.569283	plasma membrane	K12501	HST; homogentisate solanesyltransferase [EC:2.5.1.117]	map00130 Ubiquinone and other terpenoid-quinone biosynthesis
TRINITY_DN13288_c0_g1_m.2132	Molybdopterin biosynthesis protein CNX1 OS=Arabidopsis thaliana OX=3702 GN=CNX1 PE=1 SV=2	CNX1	1.63	2.31577e-05	Up	77.095	49.5	23	23	0.648703	0.620824	0.658302	1.03235	1.03579	1.07424	1.2828	1.33916	1.30783	endoplasmic reticulum	K15376	GPHN; gephyrin [EC:2.10.1.1 2.7.7.75]	map00790 Folate biosynthesis; map01100 Metabolic pathways	GO:0006139 nucleobase-containing compound metabolic process; GO:0006163 purine nucleotide metabolic process; GO:0006464 cellular protein modification process; GO:0006725 cellular aromatic compound metabolic process; GO:0006732 coenzyme metabolic process; GO:0006753 nucleoside phosphate metabolic process; GO:0006793 phosphorus metabolic process; GO:0006796 phosphate-containing compound metabolic p…	GO:0005622 intracellular; GO:0005623 cell; GO:0005737 cytoplasm; GO:0005829 cytosol;	GO:0003824 catalytic activity; GO:0005488 binding; GO:0008940 nitrate reductase activity; GO:0016491 oxidoreductase activity; GO:0016661 oxidoreductase activity, acting on other nitrogenous compounds as donors; GO:0016740 transferase activity; GO:0016772 transferase activity, transferring phosphorus-containing groups; GO:0016779 nucleotidyltransferase activity; GO:0030151 molybdenum ion binding; …	PF00994; PF03454	Probable molybdopterin binding domain; MoeA C-terminal region (domain IV)	H	KOG2371	Molybdopterin biosynthesis protein
TRINITY_DN13307_c0_g1_m.2144	Protein S-acyltransferase 8 OS=Arabidopsis thaliana OX=3702 GN=PAT08 PE=1 SV=2	PAT08	0.4984	3.14654e-05	Down	48.443	32.2	9	7	1.57236	1.59163	1.57993	0.831808	0.741404	0.791352	0.702618	0.626229	0.562673	plasma membrane	K16675	ZDHHC9_14_18; palmitoyltransferase ZDHHC9/14/18 [EC:2.3.1.225]			GO:0005623 cell; GO:0005886 plasma membrane; GO:0016020 membrane; GO:0071944 cell periphery;				S	KOG1311	DHHC-type Zn-finger proteins
TRINITY_DN1331_c0_g1_m.2150	Subtilisin-like protease SBT1.7 OS=Arabidopsis thaliana OX=3702 GN=SBT1.7 PE=1 SV=1	SBT1.7	1.6725	3.73674e-05	Up	81.147	49.1	25	23	0.604178	0.604205	0.59719	1.05574	0.968265	0.995853	1.39745	1.39465	1.38245	chloroplast							PF05922; PF00082	Peptidase inhibitor I9; Subtilase family
TRINITY_DN1341_c0_g1_m.2197	Probable glutathione S-transferase OS=Glycine max OX=3847 GN=HSP26-A PE=2 SV=1	HSP26-A	1.6967	3.73482e-05	Up	26.164	52.9	10	10	0.542666	0.529271	0.517378	0.860717	0.929549	0.9063	1.57623	1.55852	1.57937	cytoplasm	K00799	GST, gst; glutathione S-transferase [EC:2.5.1.18]	map00480 Glutathione metabolism; map01100 Metabolic pathways	GO:0001101 response to acid chemical; GO:0006518 peptide metabolic process; GO:0006575 cellular modified amino acid metabolic process; GO:0006749 glutathione metabolic process; GO:0006790 sulfur compound metabolic process; GO:0006807 nitrogen compound metabolic process; GO:0006950 response to stress; GO:0008152 metabolic process; GO:0009056 catabolic process; GO:0009266 response to temperature st…	GO:0005622 intracellular; GO:0005623 cell; GO:0005737 cytoplasm;	GO:0003824 catalytic activity; GO:0004364 glutathione transferase activity; GO:0016740 transferase activity; GO:0016765 transferase activity, transferring alkyl or aryl (other than methyl) groups;	PF02798; PF00043	Glutathione S-transferase, N-terminal domain; Glutathione S-transferase, C-terminal domain	O	KOG0406	Glutathione S-transferase
TRINITY_DN13427_c0_g4_m.2200	17.3 kDa class I heat shock protein OS=Glycine max OX=3847 GN=HSP17.3-B PE=3 SV=1	HSP17.3-B	1.5691	0.000494669	Up	19.393	17.5	2	2	0.763708	0.734215	0.676582	1.17577	1.15422	1.0821	1.09349	1.11917	1.20074	cytoplasm	K13993	HSP20; HSP20 family protein	map04141 Protein processing in endoplasmic reticulum						O	KOG0710	Molecular chaperone (small heat-shock protein Hsp26/Hsp42)
TRINITY_DN1343_c0_g1_m.2202	Alpha-glucan phosphorylase 2, cytosolic OS=Arabidopsis thaliana OX=3702 GN=PHS2 PE=1 SV=1	PHS2	2.6113	3.92557e-08	Up	85.007	64	34	33	0.538164	0.540298	0.548229	1.39795	1.42109	1.42866	1.04984	1.02693	1.04883	cytoplasm	K00688	PYG, glgP; glycogen phosphorylase [EC:2.4.1.1]	map00500 Starch and sucrose metabolism; map01100 Metabolic pathways; map01110 Biosynthesis of secondary metabolites	GO:0000272 polysaccharide catabolic process; GO:0001101 response to acid chemical; GO:0005975 carbohydrate metabolic process; GO:0005976 polysaccharide metabolic process; GO:0005977 glycogen metabolic process; GO:0005980 glycogen catabolic process; GO:0006073 cellular glucan metabolic process; GO:0006091 generation of precursor metabolites and energy; GO:0006112 energy reserve metabolic process; …	GO:0005622 intracellular; GO:0005623 cell; GO:0005737 cytoplasm; GO:0005829 cytosol; GO:0009507 chloroplast; GO:0009536 plastid; GO:0043226 organelle; GO:0043227 membrane-bounded organelle; GO:0043229 intracellular organelle; GO:0043231 intracellular membrane-bounded organelle;	GO:0003824 catalytic activity; GO:0004645 1,4-alpha-oligoglucan phosphorylase activity; GO:0005488 binding; GO:0008144 drug binding; GO:0008184 glycogen phosphorylase activity; GO:0016740 transferase activity; GO:0016757 transferase activity, transferring glycosyl groups; GO:0016758 transferase activity, transferring hexosyl groups; GO:0019842 vitamin binding; GO:0030170 pyridoxal phosphate bindi…			G	KOG2099	Glycogen phosphorylase
TRINITY_DN1352_c2_g2_m.2259	BTB/POZ domain-containing protein At5g48800 OS=Arabidopsis thaliana OX=3702 GN=At5g48800 PE=2 SV=1	At5g48800	0.3583	0.00838727	Down	76.616	7.8	4	4	1.89071	1.09804	2.07324	0.66537	0.590355	0.557967	0.518291	0.606021		extracellular					GO:0005623 cell; GO:0005886 plasma membrane; GO:0016020 membrane; GO:0071944 cell periphery;		PF00651	BTB/POZ domain
TRINITY_DN1357_c0_g1_m.2276	Serine carboxypeptidase II-3 OS=Hordeum vulgare OX=4513 GN=CXP;2-3 PE=2 SV=1	CXP;2-3	0.6149	5.10207e-05	Down	38.843	45.2	15	15	0.6785	0.652608	0.649619	0.388014	0.416712	0.413221	2.0035	1.8874	1.91043	nucleus	K16297	SCPL-II; serine carboxypeptidase-like clade II [EC:3.4.16.-]					PF00450	Serine carboxypeptidase	O	KOG1282	Serine carboxypeptidases (lysosomal cathepsin A)
TRINITY_DN1363_c1_g1_m.2318	ABC transporter G family member 7 OS=Arabidopsis thaliana OX=3702 GN=ABCG7 PE=2 SV=1	ABCG7	0.5635	0.00119002	Down	68.292	12.2	4	4	1.33605	1.27509	1.56779	0.745084	0.826413	0.783209		0.735248	0.731114	chloroplast				GO:0006810 transport; GO:0051179 localization; GO:0051234 establishment of localization; GO:0055085 transmembrane transport;	GO:0005622 intracellular; GO:0005623 cell; GO:0005737 cytoplasm; GO:0005886 plasma membrane; GO:0009507 chloroplast; GO:0009526 plastid envelope; GO:0009536 plastid; GO:0009941 chloroplast envelope; GO:0016020 membrane; GO:0016021 integral component of membrane; GO:0031224 intrinsic component of membrane; GO:0031967 organelle envelope; GO:0031975 envelope; GO:0043226 organelle; GO:0043227 membran…	GO:0003824 catalytic activity; GO:0005215 transporter activity; GO:0015399 primary active transmembrane transporter activity; GO:0016462 pyrophosphatase activity; GO:0016787 hydrolase activity; GO:0016817 hydrolase activity, acting on acid anhydrides; GO:0016818 hydrolase activity, acting on acid anhydrides, in phosphorus-containing anhydrides; GO:0016887 ATPase activity; GO:0017111 nucleoside-tr…	PF00005	ABC transporter	Q	KOG0061	Transporter, ABC superfamily (Breast cancer resistance protein)
TRINITY_DN13647_c0_g1_m.2322	Peroxidase 47 OS=Arabidopsis thaliana OX=3702 GN=PER47 PE=2 SV=2	PER47	7.8685	6.95304e-07	Up	37.555	48.4	12	11	0.153473	0.14737	0.165314	1.2667	1.20253	1.19875	1.6365	1.6055	1.62386	chloroplast	K00430	E1.11.1.7; peroxidase [EC:1.11.1.7]	map00940 Phenylpropanoid biosynthesis; map01100 Metabolic pathways; map01110 Biosynthesis of secondary metabolites	GO:0008152 metabolic process; GO:0009636 response to toxic substance; GO:0009664 plant-type cell wall organization; GO:0009987 cellular process; GO:0016043 cellular component organization; GO:0042221 response to chemical; GO:0045229 external encapsulating structure organization; GO:0050896 response to stimulus; GO:0051716 cellular response to stimulus; GO:0055114 oxidation-reduction process; GO:0…	GO:0005618 cell wall; GO:0005623 cell; GO:0005911 cell-cell junction; GO:0009505 plant-type cell wall; GO:0009506 plasmodesma; GO:0030054 cell junction; GO:0030312 external encapsulating structure; GO:0055044 symplast; GO:0071944 cell periphery;	GO:0003824 catalytic activity; GO:0004601 peroxidase activity; GO:0016209 antioxidant activity; GO:0016491 oxidoreductase activity; GO:0016684 oxidoreductase activity, acting on peroxide as acceptor;	PF00141	Peroxidase
TRINITY_DN13767_c0_g1_m.2366	Galactose-specific lectin (Fragments) OS=Morus indica OX=248361 PE=1 SV=1	--	1.5973	0.000208004	Up	16.579	65.6	6	6	0.896242	0.89321	0.884021	1.32354	1.46375	1.48315	0.624071	0.684632	0.747395	cytoplasm							PF01419	Jacalin-like lectin domain
TRINITY_DN140_c1_g1_m.2500	Cellulose synthase A catalytic subunit 1 [UDP-forming] OS=Arabidopsis thaliana OX=3702 GN=CESA1 PE=1 SV=1	CESA1	0.4368	0.0122034	Down	121.45	6.4	6	4	1.46534	1.04508	1.36186		0.618859	0.508866				plasma membrane	K10999	CESA; cellulose synthase A [EC:2.4.1.12]		GO:0000271 polysaccharide biosynthetic process; GO:0000278 mitotic cell cycle; GO:0000281 mitotic cytokinesis; GO:0000910 cytokinesis; GO:0005975 carbohydrate metabolic process; GO:0005976 polysaccharide metabolic process; GO:0006073 cellular glucan metabolic process; GO:0006950 response to stress; GO:0006970 response to osmotic stress; GO:0006972 hyperosmotic response; GO:0007049 cell cycle; GO:…	GO:0005622 intracellular; GO:0005623 cell; GO:0005737 cytoplasm; GO:0005768 endosome; GO:0005794 Golgi apparatus; GO:0005802 trans-Golgi network; GO:0005886 plasma membrane; GO:0012505 endomembrane system; GO:0016020 membrane; GO:0031410 cytoplasmic vesicle; GO:0031982 vesicle; GO:0031984 organelle subcompartment; GO:0043226 organelle; GO:0043227 membrane-bounded organelle; GO:0043229 intracellul…	GO:0003824 catalytic activity; GO:0016740 transferase activity; GO:0016757 transferase activity, transferring glycosyl groups; GO:0016758 transferase activity, transferring hexosyl groups; GO:0016759 cellulose synthase activity; GO:0046527 glucosyltransferase activity;
TRINITY_DN1408_c3_g1_m.2483	Probable methyltransferase PMT8 OS=Arabidopsis thaliana OX=3702 GN=At1g04430 PE=2 SV=1	At1g04430	0.5983	7.00144e-06	Down	70.711	41.5	19	12	1.36809	1.33707	1.35446	0.820992	0.784689	0.823286	0.84626	0.819902	0.845263	chloroplast				GO:0008152 metabolic process; GO:0032259 methylation;	GO:0005622 intracellular; GO:0005623 cell; GO:0005634 nucleus; GO:0005737 cytoplasm; GO:0005768 endosome; GO:0005773 vacuole; GO:0005774 vacuolar membrane; GO:0005794 Golgi apparatus; GO:0005802 trans-Golgi network; GO:0005911 cell-cell junction; GO:0009506 plasmodesma; GO:0012505 endomembrane system; GO:0016020 membrane; GO:0030054 cell junction; GO:0031090 organelle membrane; GO:0031410 cytopla…	GO:0003824 catalytic activity; GO:0008168 methyltransferase activity; GO:0008757 S-adenosylmethionine-dependent methyltransferase activity; GO:0016740 transferase activity; GO:0016741 transferase activity, transferring one-carbon groups;
TRINITY_DN1408_c3_g2_m.2485	Probable methyltransferase PMT8 OS=Arabidopsis thaliana OX=3702 GN=At1g04430 PE=2 SV=1	At1g04430	0.5892	3.4199e-05	Down	69.395	40.3	18	11	1.59119	1.54946	1.57571	0.954572	0.942983	0.881429	0.472972	0.512359	0.519327	cytoplasm				GO:0008152 metabolic process; GO:0032259 methylation;	GO:0005622 intracellular; GO:0005623 cell; GO:0005737 cytoplasm; GO:0005768 endosome; GO:0005773 vacuole; GO:0005774 vacuolar membrane; GO:0005794 Golgi apparatus; GO:0005802 trans-Golgi network; GO:0012505 endomembrane system; GO:0016020 membrane; GO:0031090 organelle membrane; GO:0031410 cytoplasmic vesicle; GO:0031982 vesicle; GO:0031984 organelle subcompartment; GO:0043226 organelle; GO:00432…	GO:0003824 catalytic activity; GO:0008168 methyltransferase activity; GO:0008757 S-adenosylmethionine-dependent methyltransferase activity; GO:0016740 transferase activity; GO:0016741 transferase activity, transferring one-carbon groups;
TRINITY_DN14086_c0_g1_m.2477	Sulfite oxidase OS=Arabidopsis thaliana OX=3702 GN=SOX PE=1 SV=1	SOX	1.8311	2.66506e-06	Up	43.436	54.5	15	15	0.63214	0.63857	0.633405	1.19503	1.13364	1.15804	1.23677	1.17685	1.19556	cytoplasm	K00387	SUOX; sulfite oxidase [EC:1.8.3.1]	map00920 Sulfur metabolism; map01100 Metabolic pathways	GO:0006725 cellular aromatic compound metabolic process; GO:0006778 porphyrin-containing compound metabolic process; GO:0006790 sulfur compound metabolic process; GO:0006807 nitrogen compound metabolic process; GO:0008152 metabolic process; GO:0009987 cellular process; GO:0010035 response to inorganic substance; GO:0010477 response to sulfur dioxide; GO:0015994 chlorophyll metabolic process; GO:0…	GO:0005622 intracellular; GO:0005623 cell; GO:0005737 cytoplasm; GO:0005739 mitochondrion; GO:0005777 peroxisome; GO:0042579 microbody; GO:0043226 organelle; GO:0043227 membrane-bounded organelle; GO:0043229 intracellular organelle; GO:0043231 intracellular membrane-bounded organelle;	GO:0003824 catalytic activity; GO:0008482 sulfite oxidase activity; GO:0016491 oxidoreductase activity; GO:0016667 oxidoreductase activity, acting on a sulfur group of donors; GO:0016670 oxidoreductase activity, acting on a sulfur group of donors, oxygen as acceptor;	PF00174; PF03404	Oxidoreductase molybdopterin binding domain; Mo-co oxidoreductase dimerisation domain	C	KOG0535	Sulfite oxidase, molybdopterin-binding component
TRINITY_DN1412_c1_g2_m.2514	ADP-ribosylation factor-like protein 5 OS=Dictyostelium discoideum OX=44689 GN=arl5 PE=3 SV=1	arl5	0.5814	4.2093e-05	Down	20.518	56.8	7	7	1.24913	1.34001	1.26262	0.725013	0.770327	0.743979	0.931427	0.995111	0.982383	cytoplasm	K07950	ARL5B; ADP-ribosylation factor-like protein 5B					PF00025	ADP-ribosylation factor family	U	KOG0070	GTP-binding ADP-ribosylation factor Arf1
TRINITY_DN1413_c0_g1_m.2516	22.0 kDa class IV heat shock protein OS=Glycine max OX=3847 GN=HSP22.0 PE=3 SV=1	HSP22.0	3.0416	2.06711e-07	Up	23.094	53.2	12	12	0.479094	0.477349	0.458529	1.42216	1.43164	1.44999	1.08363	1.0863	1.11132	vacuolar membrane	K13993	HSP20; HSP20 family protein	map04141 Protein processing in endoplasmic reticulum	GO:0006950 response to stress; GO:0009266 response to temperature stimulus; GO:0009408 response to heat; GO:0009628 response to abiotic stimulus; GO:0050896 response to stimulus;					O	KOG0710	Molecular chaperone (small heat-shock protein Hsp26/Hsp42)
TRINITY_DN1414_c2_g1_m.2521	Protein GrpE OS=Thermosynechococcus elongatus (strain BP-1) OX=197221 GN=grpE PE=3 SV=1	grpE	1.5116	0.000346662	Up	38.023	31.7	9	9	0.954697	0.875171	0.947989	1.4508	1.33858	1.40975	0.712856	0.658697	0.651457	chloroplast	K03687	GRPE; molecular chaperone GrpE							O	KOG3003	Molecular chaperone of the GrpE family
TRINITY_DN1423_c0_g1_m.2562	Chorismate mutase 2 OS=Arabidopsis thaliana OX=3702 GN=CM2 PE=1 SV=1	CM2	1.6697	1.74843e-05	Up	31.712	65.2	15	15	0.706312	0.713999	0.674182	1.13919	1.18569	1.17229	1.13473	1.14094	1.13266	cytoplasm	K01850	E5.4.99.5; chorismate mutase [EC:5.4.99.5]	map00400 Phenylalanine, tyrosine and tryptophan biosynthesis; map01100 Metabolic pathways; map01110 Biosynthesis of secondary metabolites; map01230 Biosynthesis of amino acids	GO:0006082 organic acid metabolic process; GO:0006520 cellular amino acid metabolic process; GO:0006725 cellular aromatic compound metabolic process; GO:0006807 nitrogen compound metabolic process; GO:0008152 metabolic process; GO:0008652 cellular amino acid biosynthetic process; GO:0009058 biosynthetic process; GO:0009072 aromatic amino acid family metabolic process; GO:0009073 aromatic amino ac…	GO:0005622 intracellular; GO:0005623 cell; GO:0005737 cytoplasm; GO:0005829 cytosol;	GO:0003824 catalytic activity; GO:0004106 chorismate mutase activity; GO:0016853 isomerase activity; GO:0016866 intramolecular transferase activity;			E	KOG0795	Chorismate mutase
TRINITY_DN1424_c0_g1_m.2564	Feruloyl CoA ortho-hydroxylase F6H1-3 OS=Ipomoea batatas OX=4120 GN=F6H1-3 PE=1 SV=1	F6H1-3	1.737	0.000286917	Up	33.521	38.9	8	6	0.662932	0.599838	0.648192	1.17327	1.10736	1.0387	1.30975	1.23479	1.22517	peroxisome	K06892	E1.14.11.61; feruloyl-CoA 6-hydroxylase [EC:1.14.11.61]	map00940 Phenylpropanoid biosynthesis; map01110 Biosynthesis of secondary metabolites	GO:0000302 response to reactive oxygen species; GO:0006725 cellular aromatic compound metabolic process; GO:0006950 response to stress; GO:0006979 response to oxidative stress; GO:0008152 metabolic process; GO:0008219 cell death; GO:0009058 biosynthetic process; GO:0009636 response to toxic substance; GO:0009698 phenylpropanoid metabolic process; GO:0009699 phenylpropanoid biosynthetic process; G…		GO:0003824 catalytic activity; GO:0016491 oxidoreductase activity; GO:0051213 dioxygenase activity;	PF03171	2OG-Fe(II) oxygenase superfamily	Q	KOG0143	Iron/ascorbate family oxidoreductases
TRINITY_DN1429_c0_g1_m.2583	Profilin-3 OS=Hevea brasiliensis OX=3981 PE=1 SV=1	--	0.5335	0.00776201	Down	14.157	25.2	3	3	1.70812	1.44544	1.48	0.666271	0.802788	1.0029	0.583641	0.70497	0.605879	cytoplasm	K05759	PFN; profilin		GO:0006810 transport; GO:0007097 nuclear migration; GO:0032956 regulation of actin cytoskeleton organization; GO:0032970 regulation of actin filament-based process; GO:0033043 regulation of organelle organization; GO:0046907 intracellular transport; GO:0050789 regulation of biological process; GO:0050794 regulation of cellular process; GO:0051128 regulation of cellular component organization; GO:…	GO:0005622 intracellular; GO:0005623 cell; GO:0005856 cytoskeleton; GO:0043226 organelle; GO:0043228 non-membrane-bounded organelle; GO:0043229 intracellular organelle; GO:0043232 intracellular non-membrane-bounded organelle;	GO:0003779 actin binding; GO:0003785 actin monomer binding; GO:0005488 binding; GO:0005515 protein binding; GO:0008092 cytoskeletal protein binding; GO:0070064 proline-rich region binding;	PF00235	Profilin	Z	KOG1755	Profilin
TRINITY_DN1432_c0_g1_m.2600	Trigger factor-like protein TIG, Chloroplastic OS=Arabidopsis thaliana OX=3702 GN=TIG PE=1 SV=1	TIG	1.7144	0.00134552	Up	60.957	18	8	8	0.996913	0.812643	0.928961	1.51849	1.50951	1.66679	0.521138	0.514634	0.530919	chloroplast	K03545	tig; trigger factor			GO:0005622 intracellular; GO:0005623 cell; GO:0005737 cytoplasm; GO:0009507 chloroplast; GO:0009526 plastid envelope; GO:0009532 plastid stroma; GO:0009536 plastid; GO:0009570 chloroplast stroma; GO:0009941 chloroplast envelope; GO:0031967 organelle envelope; GO:0031975 envelope; GO:0043226 organelle; GO:0043227 membrane-bounded organelle; GO:0043229 intracellular organelle; GO:0043231 intracellu…
TRINITY_DN14330_c0_g1_m.2603	Galectin-9 OS=Mus musculus OX=10090 GN=Lgals9 PE=1 SV=1	Lgals9	0.2087	0.000325065	Down	17.101	30.3	4	3	1.0897	1.04489	1.18746		0.210203	0.251958	1.56474	1.75154	0.899509	cytoplasm				GO:0001501 skeletal system development; GO:0001775 cell activation; GO:0001906 cell killing; GO:0002252 immune effector process; GO:0002263 cell activation involved in immune response; GO:0002274 myeloid leukocyte activation; GO:0002275 myeloid cell activation involved in immune response; GO:0002283 neutrophil activation involved in immune response; GO:0002366 leukocyte activation involved in imm…	GO:0001772 immunological synapse; GO:0005576 extracellular region; GO:0005615 extracellular space; GO:0005622 intracellular; GO:0005623 cell; GO:0005634 nucleus; GO:0005737 cytoplasm; GO:0005739 mitochondrion; GO:0005740 mitochondrial envelope; GO:0005743 mitochondrial inner membrane; GO:0005886 plasma membrane; GO:0009897 external side of plasma membrane; GO:0009986 cell surface; GO:0012505 endo…	GO:0005102 signaling receptor binding; GO:0005488 binding; GO:0005515 protein binding; GO:0019863 IgE binding; GO:0019865 immunoglobulin binding; GO:0030246 carbohydrate binding; GO:0030545 receptor regulator activity; GO:0034987 immunoglobulin receptor binding; GO:0034988 Fc-gamma receptor I complex binding; GO:0036094 small molecule binding; GO:0038023 signaling receptor activity; GO:0042056 ch…	PF00337	Galactoside-binding lectin	W	KOG3587	Galectin, galactose-binding lectin
TRINITY_DN14339_c0_g1_m.2604	uncharacterized protein LOC21400212 [Morus notabilis]	--	0.5124	3.44816e-05	Down	17.397	17.5	2	2	1.29757	1.33212	1.33535		0.687887	0.666443	0.912256	0.916506	0.851872	mitochondria
TRINITY_DN1445_c0_g1_m.2646	Homogentisate solanesyltransferase, chloroplastic OS=Arabidopsis thaliana OX=3702 GN=HST PE=1 SV=1	HST	0.615	6.39438e-06	Down	44.941	19.2	5	5	1.14447	1.17828	1.19824	0.719844	0.732735	0.712857	1.08613	1.12193	1.10551	plasma membrane	K12501	HST; homogentisate solanesyltransferase [EC:2.5.1.117]	map00130 Ubiquinone and other terpenoid-quinone biosynthesis
TRINITY_DN1457_c3_g1_m.2709	uncharacterized protein LOC21399234 [Morus notabilis]	--	1.9904	1.78678e-05	Up	65.905	19.3	9	9	0.763539	0.82482	0.815867	1.54683	1.62753	1.61105	0.589967	0.617332	0.603069	plasma membrane
TRINITY_DN1459_c0_g1_m.2714	Serine/threonine-protein kinase BSK3 OS=Arabidopsis thaliana OX=3702 GN=BSK3 PE=1 SV=1	BSK3	0.4288	4.59071e-06	Down	55.235	42.4	15	10	1.56418	1.69995	1.62821	0.70882	0.691992	0.697036	0.682795	0.664245	0.662773	cytoplasm	K14500	BSK; BR-signaling kinase [EC:2.7.11.1]	map04075 Plant hormone signal transduction	GO:0006464 cellular protein modification process; GO:0006468 protein phosphorylation; GO:0006793 phosphorus metabolic process; GO:0006796 phosphate-containing compound metabolic process; GO:0006807 nitrogen compound metabolic process; GO:0007154 cell communication; GO:0007165 signal transduction; GO:0007166 cell surface receptor signaling pathway; GO:0007167 enzyme linked receptor protein signali…	GO:0005623 cell; GO:0005886 plasma membrane; GO:0005911 cell-cell junction; GO:0009506 plasmodesma; GO:0016020 membrane; GO:0030054 cell junction; GO:0055044 symplast; GO:0071944 cell periphery;	GO:0003824 catalytic activity; GO:0004672 protein kinase activity; GO:0004674 protein serine/threonine kinase activity; GO:0004675 transmembrane receptor protein serine/threonine kinase activity; GO:0004888 transmembrane signaling receptor activity; GO:0016301 kinase activity; GO:0016740 transferase activity; GO:0016772 transferase activity, transferring phosphorus-containing groups; GO:0016773 p…	PF07714	Protein tyrosine kinase
TRINITY_DN146_c4_g1_m.2766	Binding partner of ACD11 1 OS=Arabidopsis thaliana OX=3702 GN=BPA1 PE=1 SV=1	BPA1	0.2683	0.015289	Down	33.675	12.9	3	3	1.90198	0.982139	1.35715	0.343764		0.414963				cytoplasm						GO:0003676 nucleic acid binding; GO:0003723 RNA binding; GO:0005488 binding; GO:0097159 organic cyclic compound binding; GO:1901363 heterocyclic compound binding;	PF00076	RNA recognition motif. (a.k.a. RRM, RBD, or RNP domain)
TRINITY_DN1463_c0_g1_m.2728	Probable ADP-ribosylation factor GTPase-activating protein AGD6 OS=Arabidopsis thaliana OX=3702 GN=AGD6 PE=1 SV=1	AGD6	0.6051	0.0310088	Down	50.072	18.7	6	6	1.35052	1.62671	1.71589	0.710271	0.986135	1.14329	0.486818	0.494389	0.485973	nucleus	K12492	ARFGAP1; ADP-ribosylation factor GTPase-activating protein 1	map04144 Endocytosis		GO:0005622 intracellular; GO:0005623 cell; GO:0005634 nucleus; GO:0005737 cytoplasm; GO:0005829 cytosol; GO:0043226 organelle; GO:0043227 membrane-bounded organelle; GO:0043229 intracellular organelle; GO:0043231 intracellular membrane-bounded organelle;		PF01412	Putative GTPase activating protein for Arf	TUZ	KOG0704	ADP-ribosylation factor GTPase activator
TRINITY_DN14631_c0_g1_m.2726	Very-long-chain enoyl-CoA reductase OS=Arabidopsis thaliana OX=3702 GN=ECR PE=1 SV=1	ECR	0.5801	0.00374874	Down	36.016	29.7	7	7	1.25144	1.30482	1.55195	0.864117	0.70398	0.815126	0.793016	0.771716	0.943824	cytoplasm	K10258	TER, TSC13, CER10; very-long-chain enoyl-CoA reductase [EC:1.3.1.93]	map00062 Fatty acid elongation; map01040 Biosynthesis of unsaturated fatty acids; map01100 Metabolic pathways; map01110 Biosynthesis of secondary metabolites; map01212 Fatty acid metabolism	GO:0000038 very long-chain fatty acid metabolic process; GO:0000902 cell morphogenesis; GO:0000904 cell morphogenesis involved in differentiation; GO:0006082 organic acid metabolic process; GO:0006629 lipid metabolic process; GO:0006631 fatty acid metabolic process; GO:0006633 fatty acid biosynthetic process; GO:0006643 membrane lipid metabolic process; GO:0006665 sphingolipid metabolic process; …	GO:0005622 intracellular; GO:0005623 cell; GO:0005737 cytoplasm; GO:0005783 endoplasmic reticulum; GO:0005789 endoplasmic reticulum membrane; GO:0005886 plasma membrane; GO:0009923 fatty acid elongase complex; GO:0012505 endomembrane system; GO:0016020 membrane; GO:0016021 integral component of membrane; GO:0030176 integral component of endoplasmic reticulum membrane; GO:0031224 intrinsic compone…	GO:0003824 catalytic activity; GO:0004312 fatty acid synthase activity; GO:0009922 fatty acid elongase activity; GO:0016491 oxidoreductase activity; GO:0016740 transferase activity; GO:0016746 transferase activity, transferring acyl groups; GO:0016747 transferase activity, transferring acyl groups other than amino-acyl groups;			I	KOG1639	Steroid reductase required for elongation of the very long chain fatty acids
TRINITY_DN14851_c0_g1_m.2826	Kinesin-like protein KIN-13B OS=Arabidopsis thaliana OX=3702 GN=KIN13B PE=1 SV=1	KIN13B	0.49	6.56033e-05	Down	77.931	9.3	5	3	1.26743	1.44743	1.31202	0.657527	0.669864	0.645725				nucleus	K10393	KIF2_24, MCAK; kinesin family member 2/24		GO:0000070 mitotic sister chromatid segregation; GO:0000226 microtubule cytoskeleton organization; GO:0000278 mitotic cell cycle; GO:0000280 nuclear division; GO:0000819 sister chromatid segregation; GO:0002376 immune system process; GO:0002478 antigen processing and presentation of exogenous peptide antigen; GO:0002495 antigen processing and presentation of peptide antigen via MHC class II; GO:0…	GO:0000775 chromosome, centromeric region; GO:0000776 kinetochore; GO:0005622 intracellular; GO:0005623 cell; GO:0005694 chromosome; GO:0005737 cytoplasm; GO:0005813 centrosome; GO:0005815 microtubule organizing center; GO:0005829 cytosol; GO:0005856 cytoskeleton; GO:0005871 kinesin complex; GO:0005874 microtubule; GO:0005875 microtubule associated complex; GO:0015630 microtubule cytoskeleton; GO…	GO:0003676 nucleic acid binding; GO:0003677 DNA binding; GO:0003690 double-stranded DNA binding; GO:0003774 motor activity; GO:0003777 microtubule motor activity; GO:0003824 catalytic activity; GO:0005488 binding; GO:0005515 protein binding; GO:0008017 microtubule binding; GO:0008092 cytoskeletal protein binding; GO:0015631 tubulin binding; GO:0016462 pyrophosphatase activity; GO:0016787 hydrolas…	PF00225	Kinesin motor domain	Z	KOG0246	Kinesin-like protein
TRINITY_DN1488_c0_g1_m.2836	Protein SGT1 homolog B OS=Arabidopsis thaliana OX=3702 GN=SGT1B PE=1 SV=1	SGT1B	1.6324	0.0368445	Up	40.551	9.4	3	3	0.827217	0.601622	0.700176	1.40157	1.16859	0.905321	1.0926	1.15795	1.14496	chloroplast	K12795	SUGT1, SGT1; suppressor of G2 allele of SKP1	map04626 Plant-pathogen interaction	GO:0001101 response to acid chemical; GO:0002682 regulation of immune system process; GO:0002831 regulation of response to biotic stimulus; GO:0006508 proteolysis; GO:0006511 ubiquitin-dependent protein catabolic process; GO:0006807 nitrogen compound metabolic process; GO:0006950 response to stress; GO:0006952 defense response; GO:0007154 cell communication; GO:0007165 signal transduction; GO:000…	GO:0000151 ubiquitin ligase complex; GO:0005622 intracellular; GO:0005623 cell; GO:0005634 nucleus; GO:0005737 cytoplasm; GO:0005829 cytosol; GO:0019005 SCF ubiquitin ligase complex; GO:0031461 cullin-RING ubiquitin ligase complex; GO:0032991 protein-containing complex; GO:0043226 organelle; GO:0043227 membrane-bounded organelle; GO:0043229 intracellular organelle; GO:0043231 intracellular membra…		PF04969; PF05002	CS domain; SGS domain	T	KOG1309	Suppressor of G2 allele of skp1
TRINITY_DN1492_c0_g1_m.2852	Adenylyltransferase and sulfurtransferase MOCS3 OS=Arabidopsis thaliana OX=3702 GN=MOCS3 PE=2 SV=1	MOCS3	2.4138	0.00312673	Up	27.698	19.8	4	4	0.451004	0.665509	0.669326	1.58886	1.34752	1.37426	0.893528	0.874181	1.13581	cytoplasm	K11996	MOCS3, UBA4; adenylyltransferase and sulfurtransferase [EC:2.7.7.80 2.8.1.11]	map04122 Sulfur relay system		GO:0005622 intracellular; GO:0005623 cell; GO:0005737 cytoplasm;	GO:0003824 catalytic activity; GO:0008265 Mo-molybdopterin cofactor sulfurase activity; GO:0016740 transferase activity; GO:0016782 transferase activity, transferring sulfur-containing groups; GO:0016783 sulfurtransferase activity;	PF00899	ThiF family	H	KOG2017	Molybdopterin synthase sulfurylase
TRINITY_DN1492_c0_g1_m.2853	Adenylyltransferase and sulfurtransferase MOCS3 OS=Arabidopsis thaliana OX=3702 GN=MOCS3 PE=2 SV=1	MOCS3	1.869	2.45363e-05	Up	23.511	33	6	6	0.722964	0.703178	0.682606	1.37314	1.29413	1.27401	0.999898	0.96013	0.98994	nucleus	K11996	MOCS3, UBA4; adenylyltransferase and sulfurtransferase [EC:2.7.7.80 2.8.1.11]	map04122 Sulfur relay system		GO:0005622 intracellular; GO:0005623 cell; GO:0005737 cytoplasm;	GO:0003824 catalytic activity; GO:0008265 Mo-molybdopterin cofactor sulfurase activity; GO:0016740 transferase activity; GO:0016782 transferase activity, transferring sulfur-containing groups; GO:0016783 sulfurtransferase activity;	PF00581	Rhodanese-like domain	H	KOG2017	Molybdopterin synthase sulfurylase
TRINITY_DN14964_c0_g1_m.2866	uncharacterized protein LOC21394852 [Morus notabilis]	--	1.7187	3.55408e-06	Up	18.736	44.3	7	7	0.661478	0.653528	0.649062	1.12577	1.15212	1.09767	1.20064	1.20241	1.25732	chloroplast
TRINITY_DN1497_c4_g1_m.2882	haloacid dehalogenase-like hydrolase domain-containing protein 3 isoform X2 [Morus notabilis]	--	0.3416	0.0119542	Down	19.139	23	3	3	2.25813	1.54381	1.43378	0.648155		0.544331	0.589262	0.403503	0.579024	chloroplast									S	KOG3085	Predicted hydrolase (HAD superfamily)
TRINITY_DN1498_c0_g1_m.2885	Uncharacterized membrane protein At1g16860 OS=Arabidopsis thaliana OX=3702 GN=At1g16860 PE=1 SV=1	At1g16860	0.6317	3.54108e-05	Down	47.624	21.6	7	7	1.59836	1.56718	1.63566	0.977514	1.01119	1.04433	0.380111	0.396389	0.389269	chloroplast
TRINITY_DN15037_c0_g1_m.2908	Interactor of constitutive active ROPs 3 OS=Arabidopsis thaliana OX=3702 GN=ICR3 PE=1 SV=1	ICR3	0.3492	0.000643608	Down	69.14	34.1	15	15	1.84992	1.77208	1.9519	0.628302	0.539309	0.778522	0.500961	0.506729	0.472277	nucleus					GO:0005623 cell; GO:0005886 plasma membrane; GO:0016020 membrane; GO:0071944 cell periphery;
TRINITY_DN1506_c0_g1_m.2928	Actin-5C OS=Anopheles gambiae OX=7165 GN=Act5C PE=2 SV=1	Act5C	0.4069	4.64784e-06	Down	41.793	57.7	16	5	1.03652	1.05671	1.05361	0.411858	0.419712	0.448791	1.52524	1.5206	1.52695	cytoskeleton	K10355	ACTF; actin, other eukaryote		GO:0000278 mitotic cell cycle; GO:0000281 mitotic cytokinesis; GO:0000910 cytokinesis; GO:0006996 organelle organization; GO:0007010 cytoskeleton organization; GO:0007049 cell cycle; GO:0009987 cellular process; GO:0016043 cellular component organization; GO:0022402 cell cycle process; GO:0051301 cell division; GO:0061640 cytoskeleton-dependent cytokinesis; GO:0071840 cellular component organizat…	GO:0000228 nuclear chromosome; GO:0000785 chromatin; GO:0000790 nuclear chromatin; GO:0005622 intracellular; GO:0005623 cell; GO:0005634 nucleus; GO:0005694 chromosome; GO:0005856 cytoskeleton; GO:0005884 actin filament; GO:0015629 actin cytoskeleton; GO:0031974 membrane-enclosed lumen; GO:0031981 nuclear lumen; GO:0032991 protein-containing complex; GO:0035060 brahma complex; GO:0043226 organell…	GO:0005198 structural molecule activity; GO:0005200 structural constituent of cytoskeleton;			Z	KOG0676	Actin and related proteins
TRINITY_DN15141_c0_g2_m.2977	Primary amine oxidase OS=Arthrobacter sp. (strain P1) OX=47915 GN=maoI PE=1 SV=1	maoI	1.9191	0.00025867	Up	87.588	40.9	21	14	0.50874	0.431319	0.44088	0.907938	0.867946	0.87428	1.61507	1.63989	1.71393	cytoplasm	K00276	AOC3, AOC2, tynA; primary-amine oxidase [EC:1.4.3.21]	map00260 Glycine, serine and threonine metabolism; map00350 Tyrosine metabolism; map00360 Phenylalanine metabolism; map00410 beta-Alanine metabolism; map00950 Isoquinoline alkaloid biosynthesis; map00960 Tropane, piperidine and pyridine alkaloid biosynthesis; map01100 Metabolic pathways; map01110 Biosynthesis of secondary metabolites				PF02727; PF02728; PF01179	Copper amine oxidase, N2 domain; Copper amine oxidase, N3 domain; Copper amine oxidase, enzyme domain	Q	KOG1186	Copper amine oxidase
TRINITY_DN15213_c0_g2_m.3009	NADPH-dependent oxidoreductase 2-alkenal reductase OS=Arabidopsis thaliana OX=3702 GN=AER PE=1 SV=1	AER	0.1456	0.0034174	Down	38.992	23.7	6	6	2.96703	2.62522	1.76974	0.235167	0.572453	0.263969	0.149802	0.153793	0.262829	cytoskeleton									S	KOG1196	Predicted NAD-dependent oxidoreductase
TRINITY_DN15230_c1_g1_m.3019	Cytochrome c oxidase subunit 5b-2, mitochondrial OS=Arabidopsis thaliana OX=3702 GN=COX5B-2 PE=1 SV=1	COX5B-2	2.194	0.00136335	Up	19.328	41.1	5	5	0.990055	0.728122	0.741631	1.77239	1.84231	1.78201	0.424431	0.357232	0.361816	mitochondria	K02265	COX5B; cytochrome c oxidase subunit 5b	map00190 Oxidative phosphorylation; map01100 Metabolic pathways	GO:0006091 generation of precursor metabolites and energy; GO:0006119 oxidative phosphorylation; GO:0006123 mitochondrial electron transport, cytochrome c to oxygen; GO:0006139 nucleobase-containing compound metabolic process; GO:0006163 purine nucleotide metabolic process; GO:0006164 purine nucleotide biosynthetic process; GO:0006725 cellular aromatic compound metabolic process; GO:0006753 nucle…	GO:0005622 intracellular; GO:0005623 cell; GO:0005737 cytoplasm; GO:0005739 mitochondrion; GO:0005740 mitochondrial envelope; GO:0005743 mitochondrial inner membrane; GO:0005746 mitochondrial respirasome; GO:0005751 mitochondrial respiratory chain complex IV; GO:0016020 membrane; GO:0019866 organelle inner membrane; GO:0031090 organelle membrane; GO:0031966 mitochondrial membrane; GO:0031967 orga…		PF01215	Cytochrome c oxidase subunit Vb	C	KOG3352	Cytochrome c oxidase, subunit Vb/COX4
TRINITY_DN1524_c0_g2_m.3022	Cytochrome P450 71A1 OS=Persea americana OX=3435 GN=CYP71A1 PE=1 SV=2	CYP71A1	0.2871	0.00203882	Down	61.835	9.2	3	3	1.90289	1.73196	2.00622	0.472994	0.733959	0.412615	0.364541	0.374821		chloroplast	K00495	CYP71AN24; phenylacetaldehyde oxime monooxygenase [EC:1.14.14.44]	map00460 Cyanoamino acid metabolism; map01100 Metabolic pathways; map01110 Biosynthesis of secondary metabolites	GO:0008152 metabolic process; GO:0009058 biosynthetic process; GO:0019748 secondary metabolic process; GO:0044550 secondary metabolite biosynthetic process; GO:0055114 oxidation-reduction process;	GO:0005622 intracellular; GO:0005623 cell; GO:0005737 cytoplasm; GO:0005783 endoplasmic reticulum; GO:0005789 endoplasmic reticulum membrane; GO:0012505 endomembrane system; GO:0016020 membrane; GO:0031090 organelle membrane; GO:0031984 organelle subcompartment; GO:0042175 nuclear outer membrane-endoplasmic reticulum membrane network; GO:0043226 organelle; GO:0043227 membrane-bounded organelle; G…	GO:0003824 catalytic activity; GO:0004497 monooxygenase activity; GO:0016491 oxidoreductase activity; GO:0016705 oxidoreductase activity, acting on paired donors, with incorporation or reduction of molecular oxygen; GO:0016709 oxidoreductase activity, acting on paired donors, with incorporation or reduction of molecular oxygen, NAD(P)H as one donor, and incorporation of one atom of oxygen;	PF00067	Cytochrome P450	Q	KOG0156	Cytochrome P450 CYP2 subfamily
TRINITY_DN1527_c0_g1_m.3035	uncharacterized protein LOC21399481 [Morus notabilis]	--	0.4416	0.0217108	Down	72.363	8.8	3	3	1.56646	1.4254	1.53419	0.396625	0.759196	0.842708		0.72254	0.752885	nucleus
TRINITY_DN1534_c0_g1_m.3075	Beta-galactosidase 3 OS=Arabidopsis thaliana OX=3702 GN=BGAL3 PE=2 SV=1	BGAL3	1.5363	4.23622e-06	Up	78.555	71.9	36	35	0.951105	0.965922	0.974904	1.51087	1.46236	1.4695	0.570617	0.547329	0.547395	plasma membrane					GO:0005618 cell wall; GO:0005622 intracellular; GO:0005623 cell; GO:0005737 cytoplasm; GO:0005773 vacuole; GO:0009505 plant-type cell wall; GO:0030312 external encapsulating structure; GO:0043226 organelle; GO:0043227 membrane-bounded organelle; GO:0043229 intracellular organelle; GO:0043231 intracellular membrane-bounded organelle; GO:0071944 cell periphery;	GO:0003824 catalytic activity; GO:0004553 hydrolase activity, hydrolyzing O-glycosyl compounds; GO:0004565 beta-galactosidase activity; GO:0015925 galactosidase activity; GO:0016787 hydrolase activity; GO:0016798 hydrolase activity, acting on glycosyl bonds;	PF01301	Glycosyl hydrolases family 35	G	KOG0496	Beta-galactosidase
TRINITY_DN1534_c0_g1_m.3076	Beta-galactosidase 3 OS=Arabidopsis thaliana OX=3702 GN=BGAL3 PE=2 SV=1	BGAL3	1.7679	1.77898e-05	Up	14.082	67.2	6	6	0.940071	0.982571	0.960106	1.64683	1.763	1.68663	0.313588	0.358782	0.348424	nucleus					GO:0005618 cell wall; GO:0005622 intracellular; GO:0005623 cell; GO:0005737 cytoplasm; GO:0005773 vacuole; GO:0009505 plant-type cell wall; GO:0030312 external encapsulating structure; GO:0043226 organelle; GO:0043227 membrane-bounded organelle; GO:0043229 intracellular organelle; GO:0043231 intracellular membrane-bounded organelle; GO:0071944 cell periphery;	GO:0003824 catalytic activity; GO:0004553 hydrolase activity, hydrolyzing O-glycosyl compounds; GO:0004565 beta-galactosidase activity; GO:0015925 galactosidase activity; GO:0016787 hydrolase activity; GO:0016798 hydrolase activity, acting on glycosyl bonds;	PF02140	Galactose binding lectin domain	G	KOG0496	Beta-galactosidase
TRINITY_DN1538_c0_g1_m.3093	Multiprotein-bridging factor 1b OS=Arabidopsis thaliana OX=3702 GN=MBF1B PE=2 SV=1	MBF1B	1.685	0.000475692	Up	15.662	45.8	6	6	0.689344	0.797923	0.790661	1.26013	1.32238	1.25575	0.991043	0.968304	0.924465	nucleus	K03627	MBF1; putative transcription factor		GO:0006355 regulation of transcription, DNA-templated; GO:0009889 regulation of biosynthetic process; GO:0009891 positive regulation of biosynthetic process; GO:0009893 positive regulation of metabolic process; GO:0010468 regulation of gene expression; GO:0010556 regulation of macromolecule biosynthetic process; GO:0010557 positive regulation of macromolecule biosynthetic process; GO:0010604 posi…	GO:0005622 intracellular; GO:0005623 cell; GO:0005634 nucleus; GO:0005730 nucleolus; GO:0005737 cytoplasm; GO:0031974 membrane-enclosed lumen; GO:0031981 nuclear lumen; GO:0043226 organelle; GO:0043227 membrane-bounded organelle; GO:0043228 non-membrane-bounded organelle; GO:0043229 intracellular organelle; GO:0043231 intracellular membrane-bounded organelle; GO:0043232 intracellular non-membrane…	GO:0003676 nucleic acid binding; GO:0003712 transcription coregulator activity; GO:0003713 transcription coactivator activity; GO:0003723 RNA binding; GO:0003729 mRNA binding; GO:0005488 binding; GO:0097159 organic cyclic compound binding; GO:0140110 transcription regulator activity; GO:1901363 heterocyclic compound binding;	PF01381	Helix-turn-helix	K	KOG3398	Transcription factor MBF1
TRINITY_DN15488_c0_g1_m.3131	hypothetical protein	--	0.3495	3.57077e-06	Down	25.218	48.4	8	8	1.30234	1.24358	1.37234	0.459811	0.459222	0.450527	1.23273	1.26333	1.21612	extracellular
TRINITY_DN1554_c0_g1_m.3148	Protein seele OS=Drosophila melanogaster OX=7227 GN=sel PE=1 SV=1	sel	2.0632	0.000772954	Up	21.097	28.5	5	5	0.676151	0.615623	0.698207	1.54881	1.33157	1.22528	1.09051		0.813847	extracellular	K22936	CNPY1_2; protein canopy 1/2
TRINITY_DN1562_c0_g1_m.3179	Protein EMSY-LIKE 3 OS=Arabidopsis thaliana OX=3702 GN=EML3 PE=1 SV=1	EML3	0.6492	0.00691547	Down	51.123	20.1	5	5	1.25903	1.35356	1.50059	0.77437	0.961277	0.934618	0.55945	0.779646	0.877461	nucleus									S	KOG4675	Uncharacterized conserved protein, contains ENT domain
TRINITY_DN1571_c0_g1_m.3218	Subtilisin-like protease SBT3.6 OS=Arabidopsis thaliana OX=3702 GN=SBT3.6 PE=2 SV=1	SBT3.6	1.6744	7.69451e-06	Up	82.82	35.3	21	21	0.851895	0.877696	0.887448	1.49698	1.443	1.44195	0.673494	0.661363	0.666181	chloroplast					GO:0005576 extracellular region;		PF05922; PF00082	Peptidase inhibitor I9; Subtilase family
TRINITY_DN1573_c0_g1_m.3227	Probable alpha-amylase 2 OS=Arabidopsis thaliana OX=3702 GN=AMY2 PE=2 SV=1	AMY2	3.8048	7.70396e-07	Up	46.886	57.9	16	15	0.356557	0.371342	0.384019	1.38226	1.44656	1.4018	1.19391	1.23696	1.2266	cytoskeleton	K01176	AMY, amyA, malS; alpha-amylase [EC:3.2.1.1]	map00500 Starch and sucrose metabolism; map01100 Metabolic pathways	GO:0000272 polysaccharide catabolic process; GO:0005975 carbohydrate metabolic process; GO:0005976 polysaccharide metabolic process; GO:0005982 starch metabolic process; GO:0005983 starch catabolic process; GO:0005984 disaccharide metabolic process; GO:0005985 sucrose metabolic process; GO:0005987 sucrose catabolic process; GO:0006073 cellular glucan metabolic process; GO:0008152 metabolic proces…	GO:0005576 extracellular region;	GO:0003824 catalytic activity; GO:0004553 hydrolase activity, hydrolyzing O-glycosyl compounds; GO:0004556 alpha-amylase activity; GO:0016160 amylase activity; GO:0016787 hydrolase activity; GO:0016798 hydrolase activity, acting on glycosyl bonds;	PF00128; PF07821	Alpha amylase, catalytic domain; Alpha-amylase C-terminal beta-sheet domain	G	KOG0471	Alpha-amylase
TRINITY_DN1575_c0_g1_m.3231	Tropinone reductase homolog At2g29360 OS=Arabidopsis thaliana OX=3702 GN=SDR PE=1 SV=1	SDR	0.6379	2.28693e-06	Down	28.417	56.4	14	13	1.27126	1.30898	1.28734	0.812115	0.821949	0.832916	0.882379	0.88804	0.895028	cytoplasm	K08081	TR1; tropinone reductase I [EC:1.1.1.206]	map00960 Tropane, piperidine and pyridine alkaloid biosynthesis; map01100 Metabolic pathways; map01110 Biosynthesis of secondary metabolites				PF13561	Enoyl-(Acyl carrier protein) reductase	Q	KOG0725	Reductases with broad range of substrate specificities
TRINITY_DN15855_c0_g1_m.3254	Ubiquitin fusion degradation protein 1 homolog OS=Dictyostelium discoideum OX=44689 GN=ufd1 PE=3 SV=1	ufd1	1.5657	5.80399e-05	Up	36.033	50.9	14	14	0.723128	0.77211	0.750446	1.13391	1.18724	1.19486	1.06005	1.08434	1.09392	nucleus	K14016	UFD1; ubiquitin fusion degradation protein 1	map04141 Protein processing in endoplasmic reticulum	GO:0001817 regulation of cytokine production; GO:0001818 negative regulation of cytokine production; GO:0002682 regulation of immune system process; GO:0002683 negative regulation of immune system process; GO:0002697 regulation of immune effector process; GO:0002698 negative regulation of immune effector process; GO:0002831 regulation of response to biotic stimulus; GO:0002832 negative regulation…	GO:0005622 intracellular; GO:0005623 cell; GO:0005737 cytoplasm; GO:0005783 endoplasmic reticulum; GO:0005789 endoplasmic reticulum membrane; GO:0012505 endomembrane system; GO:0016020 membrane; GO:0031984 organelle subcompartment; GO:0032991 protein-containing complex; GO:0034098 VCP-NPL4-UFD1 AAA ATPase complex; GO:0036501 UFD1-NPL4 complex; GO:0042175 nuclear outer membrane-endoplasmic reticul…	GO:0005102 signaling receptor binding; GO:0005488 binding; GO:0005515 protein binding; GO:0019899 enzyme binding; GO:0044877 protein-containing complex binding; GO:0051117 ATPase binding;			O	KOG1816	Ubiquitin fusion-degradation protein
TRINITY_DN1597_c0_g1_m.3306	Glycolipid transfer protein 1 OS=Arabidopsis thaliana OX=3702 GN=GLTP1 PE=2 SV=1	GLTP1	0.6452	1.64431e-05	Down	22.571	78.5	13	12	1.28226	1.28991	1.2677	0.852307	0.80365	0.821508	0.920129	0.872156	0.890387	nucleus	K08051	PLEKHA8, FAPP2; pleckstrin homology domain containing family A member 8			GO:0005622 intracellular; GO:0005623 cell; GO:0005737 cytoplasm; GO:0005829 cytosol; GO:0005886 plasma membrane; GO:0016020 membrane; GO:0071944 cell periphery;		PF08718	Glycolipid transfer protein (GLTP)	G	KOG3221	Glycolipid transfer protein
TRINITY_DN1606_c0_g1_m.3360	Putative hydrolase C777.06c OS=Schizosaccharomyces pombe (strain 972 / ATCC 24843) OX=284812 GN=SPCC777.06c PE=4 SV=1	SPCC777.06c	0.3683	9.26523e-05	Down	39.487	16.9	5	5	1.66886	1.56165	1.66329	0.535605	0.610564	0.656153	0.623455	0.761686	0.918736	cytoplasm							PF12706	Beta-lactamase superfamily domain
TRINITY_DN16137_c0_g2_m.3389	Dicarboxylate transporter 2.1, chloroplastic OS=Arabidopsis thaliana OX=3702 GN=DIT2-1 PE=1 SV=1	DIT2-1	0.5477	0.000158307	Down	60.341	6.4	3	3	1.34821	1.22063	1.39726	0.740108	0.702015	0.730105	0.865525	0.891579	1.10456	chloroplast
TRINITY_DN1615_c0_g1_m.3396	Abscisic acid receptor PYL8 OS=Arabidopsis thaliana OX=3702 GN=PYL8 PE=1 SV=1	PYL8	2.1238	3.15054e-05	Up	21.67	37.6	6	4	0.581988	0.594006	0.628764	1.20757	1.31169	1.3137	1.07558	1.13175	1.15495	cytoplasm	K14496	PYL; abscisic acid receptor PYR/PYL family	map04016 MAPK signaling pathway - plant; map04075 Plant hormone signal transduction	GO:0001101 response to acid chemical; GO:0007154 cell communication; GO:0007165 signal transduction; GO:0009719 response to endogenous stimulus; GO:0009725 response to hormone; GO:0009737 response to abscisic acid; GO:0009738 abscisic acid-activated signaling pathway; GO:0009755 hormone-mediated signaling pathway; GO:0009787 regulation of abscisic acid-activated signaling pathway; GO:0009789 posi…	GO:0005622 intracellular; GO:0005623 cell; GO:0005634 nucleus; GO:0005737 cytoplasm; GO:0043226 organelle; GO:0043227 membrane-bounded organelle; GO:0043229 intracellular organelle; GO:0043231 intracellular membrane-bounded organelle;	GO:0004857 enzyme inhibitor activity; GO:0004864 protein phosphatase inhibitor activity; GO:0005488 binding; GO:0005515 protein binding; GO:0008289 lipid binding; GO:0010427 abscisic acid binding; GO:0019208 phosphatase regulator activity; GO:0019212 phosphatase inhibitor activity; GO:0019840 isoprenoid binding; GO:0019888 protein phosphatase regulator activity; GO:0030234 enzyme regulator activi…
TRINITY_DN16192_c1_g1_m.3410	uncharacterized protein LOC21391786 [Morus notabilis]	--	0.6386	0.00189267	Down	35.461	20.1	4	4	1.32994	1.50722	1.33899	0.928346	0.930016	0.808431	0.664793	0.74694	0.745323	cytoplasm									S	KOG2933	Uncharacterized conserved protein
TRINITY_DN1637_c1_g1_m.3471	DnaJ homolog subfamily B member 13 OS=Mus musculus OX=10090 GN=Dnajb13 PE=1 SV=1	Dnajb13	2.3526	5.42213e-07	Up	37.777	47.4	10	9	0.562915	0.544695	0.544383	1.28866	1.2774	1.32035	1.14397	1.16365	1.15398	cytoskeleton	K09510	DNAJB4; DnaJ homolog subfamily B member 4		GO:0000226 microtubule cytoskeleton organization; GO:0001578 microtubule bundle formation; GO:0006996 organelle organization; GO:0007010 cytoskeleton organization; GO:0007017 microtubule-based process; GO:0009987 cellular process; GO:0016043 cellular component organization; GO:0022607 cellular component assembly; GO:0030030 cell projection organization; GO:0030031 cell projection assembly; GO:003…	GO:0005622 intracellular; GO:0005623 cell; GO:0005737 cytoplasm; GO:0005856 cytoskeleton; GO:0005929 cilium; GO:0005930 axoneme; GO:0031514 motile cilium; GO:0032838 plasma membrane bounded cell projection cytoplasm; GO:0036126 sperm flagellum; GO:0042995 cell projection; GO:0043226 organelle; GO:0043228 non-membrane-bounded organelle; GO:0043229 intracellular organelle; GO:0043232 intracellular …		PF00226; PF01556	DnaJ domain; DnaJ C terminal domain	O	KOG0714	Molecular chaperone (DnaJ superfamily)
TRINITY_DN1641_c2_g1_m.3489	Mitochondrial amidoxime reducing component 2 OS=Bos taurus OX=9913 GN=MARC2 PE=2 SV=1	MARC2	2.2079	6.36304e-06	Up	35.349	38.1	9	9	0.53858	0.509051	0.508753	1.18204	1.11487	1.13946	1.35768	1.28615	1.36343	cytoplasm							PF03476; PF03473	MOSC N-terminal beta barrel domain; MOSC domain	S	KOG2362	Uncharacterized Fe-S protein
TRINITY_DN1651_c1_g1_m.3520	Molybdate-anion transporter OS=Homo sapiens OX=9606 GN=MFSD5 PE=1 SV=2	MFSD5	0.4818	0.0032128	Down	50.744	7	5	5	1.36248	1.47835	1.15593	0.648269	0.737799	0.539585	1.10082	0.962261	1.0145	cytoplasm				GO:0007154 cell communication; GO:0007165 signal transduction; GO:0009987 cellular process; GO:0023052 signaling; GO:0050789 regulation of biological process; GO:0050794 regulation of cellular process; GO:0050896 response to stimulus; GO:0051716 cellular response to stimulus; GO:0065007 biological regulation;	GO:0005622 intracellular; GO:0005623 cell; GO:0005737 cytoplasm; GO:0009507 chloroplast; GO:0009526 plastid envelope; GO:0009527 plastid outer membrane; GO:0009536 plastid; GO:0009707 chloroplast outer membrane; GO:0009941 chloroplast envelope; GO:0016020 membrane; GO:0019867 outer membrane; GO:0031090 organelle membrane; GO:0031967 organelle envelope; GO:0031968 organelle outer membrane; GO:0031…	GO:0004888 transmembrane signaling receptor activity; GO:0005488 binding; GO:0005515 protein binding; GO:0019899 enzyme binding; GO:0038023 signaling receptor activity; GO:0051087 chaperone binding; GO:0051117 ATPase binding; GO:0060089 molecular transducer activity;			G	KOG4332	Predicted sugar transporter
TRINITY_DN1657_c0_g1_m.3544	Nudix hydrolase 2 OS=Arabidopsis thaliana OX=3702 GN=NUDT2 PE=1 SV=1	NUDT2	0.4946	0.0106814	Down	31.943	18	3	3	1.71278	1.45299	1.07917	0.641997	0.653978	0.803405		0.655678		cytoplasm				GO:0006950 response to stress; GO:0006979 response to oxidative stress; GO:0050896 response to stimulus;	GO:0005622 intracellular; GO:0005623 cell; GO:0005737 cytoplasm; GO:0005829 cytosol;	GO:0000166 nucleotide binding; GO:0003824 catalytic activity; GO:0005488 binding; GO:0016462 pyrophosphatase activity; GO:0016787 hydrolase activity; GO:0016817 hydrolase activity, acting on acid anhydrides; GO:0016818 hydrolase activity, acting on acid anhydrides, in phosphorus-containing anhydrides; GO:0036094 small molecule binding; GO:0047631 ADP-ribose diphosphatase activity; GO:0048037 cofa…	PF00293	NUDIX domain	T	KOG0648	Predicted NUDIX hydrolase FGF-2 and related proteins
TRINITY_DN16577_c0_g1_m.3543	Protein SIEVE ELEMENT OCCLUSION B OS=Arabidopsis thaliana OX=3702 GN=SEOB PE=1 SV=1	SEOB	0.6572	2.53418e-06	Down	88.352	66.5	50	49	1.24477	1.28137	1.25879	0.820384	0.839224	0.827776	0.897659	0.918076	0.911946	peroxisome				GO:0009888 tissue development; GO:0010087 phloem or xylem histogenesis; GO:0010088 phloem development; GO:0032502 developmental process; GO:0048856 anatomical structure development;		GO:0005488 binding; GO:0005515 protein binding; GO:0042802 identical protein binding; GO:0042803 protein homodimerization activity; GO:0043621 protein self-association; GO:0046983 protein dimerization activity;
TRINITY_DN1671_c4_g1_m.3586	Plasma membrane ATPase 4 OS=Nicotiana plumbaginifolia OX=4092 GN=PMA4 PE=2 SV=1	PMA4	0.368	3.61777e-06	Down	105.12	38.2	31	13	1.74527	1.74783	1.82231	0.621781	0.673334	0.660837	0.581598	0.579878	0.567153	plasma membrane	K01535	PMA1, PMA2; H+-transporting ATPase [EC:7.1.2.1]	map00190 Oxidative phosphorylation; map01100 Metabolic pathways	GO:0006810 transport; GO:0006811 ion transport; GO:0006812 cation transport; GO:0015672 monovalent inorganic cation transport; GO:0034220 ion transmembrane transport; GO:0051179 localization; GO:0051234 establishment of localization; GO:0055085 transmembrane transport; GO:0098655 cation transmembrane transport; GO:0098660 inorganic ion transmembrane transport; GO:0098662 inorganic cation transmem…	GO:0005622 intracellular; GO:0005623 cell; GO:0005737 cytoplasm; GO:0005773 vacuole; GO:0005774 vacuolar membrane; GO:0005886 plasma membrane; GO:0016020 membrane; GO:0031090 organelle membrane; GO:0043226 organelle; GO:0043227 membrane-bounded organelle; GO:0043229 intracellular organelle; GO:0043231 intracellular membrane-bounded organelle; GO:0071944 cell periphery; GO:0098588 bounding membran…	GO:0003824 catalytic activity; GO:0005215 transporter activity; GO:0008324 cation transmembrane transporter activity; GO:0008553 proton-exporting ATPase activity, phosphorylative mechanism; GO:0015075 ion transmembrane transporter activity; GO:0015077 monovalent inorganic cation transmembrane transporter activity; GO:0015078 proton transmembrane transporter activity; GO:0015318 inorganic molecula…	PF00690; PF00702	Cation transporter/ATPase, N-terminus; haloacid dehalogenase-like hydrolase	P	KOG0205	Plasma membrane H+-transporting ATPase
TRINITY_DN1673_c0_g1_m.3595	23.5 kDa heat shock protein, mitochondrial OS=Arabidopsis thaliana OX=3702 GN=HSP23.5 PE=2 SV=1	HSP23.5	1.8068	8.36693e-07	Up	27.557	27.2	6	6	0.519893	0.533465	0.539766	0.954515	0.963966	0.960006	1.51826	1.52399	1.48614	mitochondria	K13993	HSP20; HSP20 family protein	map04141 Protein processing in endoplasmic reticulum	GO:0006950 response to stress; GO:0006970 response to osmotic stress; GO:0009266 response to temperature stimulus; GO:0009408 response to heat; GO:0009628 response to abiotic stimulus; GO:0010035 response to inorganic substance; GO:0010038 response to metal ion; GO:0042221 response to chemical; GO:0046686 response to cadmium ion; GO:0050896 response to stimulus;					O	KOG0710	Molecular chaperone (small heat-shock protein Hsp26/Hsp42)
TRINITY_DN1675_c1_g1_m.3609	Probable xyloglucan 6-xylosyltransferase 5 OS=Arabidopsis thaliana OX=3702 GN=XXT5 PE=1 SV=1	XXT5	0.6381	0.0062568	Down	52.394	16.6	5	3	1.33382	1.40985	1.3617	0.733082	0.919611	0.967014	0.748069	0.756642	0.770215	mitochondria	K08238	XXT; xyloglucan 6-xylosyltransferase [EC:2.4.2.39]		GO:0000271 polysaccharide biosynthetic process; GO:0005975 carbohydrate metabolic process; GO:0005976 polysaccharide metabolic process; GO:0006073 cellular glucan metabolic process; GO:0007275 multicellular organism development; GO:0008152 metabolic process; GO:0009058 biosynthetic process; GO:0009059 macromolecule biosynthetic process; GO:0009250 glucan biosynthetic process; GO:0009653 anatomica…	GO:0000139 Golgi membrane; GO:0005622 intracellular; GO:0005623 cell; GO:0005737 cytoplasm; GO:0005768 endosome; GO:0005794 Golgi apparatus; GO:0005802 trans-Golgi network; GO:0012505 endomembrane system; GO:0016020 membrane; GO:0031090 organelle membrane; GO:0031410 cytoplasmic vesicle; GO:0031982 vesicle; GO:0031984 organelle subcompartment; GO:0043226 organelle; GO:0043227 membrane-bounded org…	GO:0003824 catalytic activity; GO:0008194 UDP-glycosyltransferase activity; GO:0016740 transferase activity; GO:0016757 transferase activity, transferring glycosyl groups; GO:0016758 transferase activity, transferring hexosyl groups; GO:0016763 transferase activity, transferring pentosyl groups; GO:0033843 xyloglucan 6-xylosyltransferase activity; GO:0035252 UDP-xylosyltransferase activity; GO:00…			GM	KOG4748	Subunit of Golgi mannosyltransferase complex
TRINITY_DN1677_c0_g1_m.3621	Probable nucleoredoxin 1 OS=Arabidopsis thaliana OX=3702 GN=At1g60420 PE=1 SV=1	At1g60420	1.7782	2.57353e-06	Up	64.107	66	34	34	0.533162	0.559624	0.546056	0.962624	0.973749	0.977878	1.47594	1.47649	1.49448	cytoplasm	K17609	NXN; nucleoredoxin [EC:1.8.1.8]		GO:0000003 reproduction; GO:0000902 cell morphogenesis; GO:0000904 cell morphogenesis involved in differentiation; GO:0001558 regulation of cell growth; GO:0003006 developmental process involved in reproduction; GO:0006935 chemotaxis; GO:0008152 metabolic process; GO:0009605 response to external stimulus; GO:0009636 response to toxic substance; GO:0009653 anatomical structure morphogenesis; GO:00…	GO:0005622 intracellular; GO:0005623 cell; GO:0005737 cytoplasm; GO:0005829 cytosol;	GO:0003824 catalytic activity; GO:0004791 thioredoxin-disulfide reductase activity; GO:0015036 disulfide oxidoreductase activity; GO:0016209 antioxidant activity; GO:0016491 oxidoreductase activity; GO:0016651 oxidoreductase activity, acting on NAD(P)H; GO:0016667 oxidoreductase activity, acting on a sulfur group of donors; GO:0016668 oxidoreductase activity, acting on a sulfur group of donors, N…	PF13905; PF03107	Thioredoxin-like; C1 domain	O	KOG2501	Thioredoxin, nucleoredoxin and related proteins
TRINITY_DN16937_c0_g1_m.3683	Probable glycosyltransferase At5g03795 OS=Arabidopsis thaliana OX=3702 GN=At5g03795 PE=3 SV=2	At5g03795	0.6228	0.00738769	Down	51.605	13.3	4	4	1.13973	1.24277	1.31542	0.642353	0.819373	0.84118	0.808426	1.18359	1.00717	cytoplasm									GMW	KOG1075	FOG: Reverse transcriptase
TRINITY_DN16940_c0_g1_m.3686	Alpha-dioxygenase 2 OS=Arabidopsis thaliana OX=3702 GN=DOX2 PE=2 SV=1	DOX2	0.528	0.000778171	Down	15.349	8.8	1	1	0.891776	0.888231	0.988362	0.484666		0.489883	1.30942	1.32283	1.62483	cytoplasm	K10529	DOX; alpha-dioxygenase [EC:1.14.99.-]	map00592 alpha-Linolenic acid metabolism	GO:0001676 long-chain fatty acid metabolic process; GO:0006082 organic acid metabolic process; GO:0006629 lipid metabolic process; GO:0006631 fatty acid metabolic process; GO:0007275 multicellular organism development; GO:0007568 aging; GO:0008152 metabolic process; GO:0009987 cellular process; GO:0010150 leaf senescence; GO:0019752 carboxylic acid metabolic process; GO:0032501 multicellular orga…		GO:0003824 catalytic activity; GO:0016491 oxidoreductase activity; GO:0051213 dioxygenase activity;	PF03098	Animal haem peroxidase	S	KOG2408	Peroxidase/oxygenase
TRINITY_DN16977_c1_g1_m.3692	Xyloglucan endotransglucosylase/hydrolase protein 9 OS=Arabidopsis thaliana OX=3702 GN=XTH9 PE=2 SV=2	XTH9	0.5365	0.00138059	Down	36.092	29.8	6	6	1.48649	1.50168	1.62528	0.712882	0.916624	0.845508	0.674765	0.649301	0.587475	chloroplast	K08235	E2.4.1.207; xyloglucan:xyloglucosyl transferase [EC:2.4.1.207]				GO:0003824 catalytic activity; GO:0016740 transferase activity; GO:0016757 transferase activity, transferring glycosyl groups; GO:0016758 transferase activity, transferring hexosyl groups; GO:0016762 xyloglucan:xyloglucosyl transferase activity; GO:0046527 glucosyltransferase activity;	PF00722	Glycosyl hydrolases family 16
TRINITY_DN1720_c1_g1_m.3791	Glucose-1-phosphate adenylyltransferase large subunit 1 (Fragment) OS=Solanum tuberosum OX=4113 GN=AGPS1 PE=1 SV=1	AGPS1	3.8221	7.2996e-10	Up	59.419	71	29	27	0.511012	0.514609	0.513708	1.97646	1.95188	1.95514	0.53402	0.52375	0.519421	chloroplast	K00975	glgC; glucose-1-phosphate adenylyltransferase [EC:2.7.7.27]	map00500 Starch and sucrose metabolism; map00520 Amino sugar and nucleotide sugar metabolism; map01100 Metabolic pathways; map01110 Biosynthesis of secondary metabolites	GO:0000271 polysaccharide biosynthetic process; GO:0005975 carbohydrate metabolic process; GO:0005976 polysaccharide metabolic process; GO:0005982 starch metabolic process; GO:0006073 cellular glucan metabolic process; GO:0008152 metabolic process; GO:0009058 biosynthetic process; GO:0009059 macromolecule biosynthetic process; GO:0009250 glucan biosynthetic process; GO:0009987 cellular process; G…	GO:0005622 intracellular; GO:0005623 cell; GO:0005737 cytoplasm; GO:0009501 amyloplast; GO:0009507 chloroplast; GO:0009536 plastid; GO:0010170 glucose-1-phosphate adenylyltransferase complex; GO:0032991 protein-containing complex; GO:0043226 organelle; GO:0043227 membrane-bounded organelle; GO:0043229 intracellular organelle; GO:0043231 intracellular membrane-bounded organelle; GO:0061695 transfe…	GO:0003824 catalytic activity; GO:0008878 glucose-1-phosphate adenylyltransferase activity; GO:0016740 transferase activity; GO:0016772 transferase activity, transferring phosphorus-containing groups; GO:0016779 nucleotidyltransferase activity; GO:0070566 adenylyltransferase activity;			M	KOG1322	GDP-mannose pyrophosphorylase/mannose-1-phosphate guanylyltransferase
TRINITY_DN1732_c0_g1_m.3836	Basic blue protein OS=Cucumis sativus OX=3659 PE=1 SV=1	--	1.9374	2.63416e-06	Up	13.215	44.8	5	5	0.696369	0.706205	0.702076	1.40232	1.34938	1.32592	0.934046	0.932096	0.951596	extracellular				GO:0000003 reproduction; GO:0003006 developmental process involved in reproduction; GO:0007275 multicellular organism development; GO:0009791 post-embryonic development; GO:0009856 pollination; GO:0009908 flower development; GO:0022414 reproductive process; GO:0032501 multicellular organismal process; GO:0032502 developmental process; GO:0044706 multi-multicellular organism process; GO:0048367 sh…	GO:0005576 extracellular region; GO:0005623 cell; GO:0005886 plasma membrane; GO:0016020 membrane; GO:0031012 extracellular matrix; GO:0031224 intrinsic component of membrane; GO:0031225 anchored component of membrane; GO:0031226 intrinsic component of plasma membrane; GO:0046658 anchored component of plasma membrane; GO:0048046 apoplast; GO:0071944 cell periphery;		PF02298	Plastocyanin-like domain
TRINITY_DN17393_c0_g2_m.3873	uncharacterized protein LOC21395087 [Morus notabilis]	--	0.6503	1.03984e-07	Down	33.458	16.3	4	4	1.23431	1.24673	1.23084	0.802018	0.809528	0.802359	0.931216	0.98968	0.953327	nucleus
TRINITY_DN174_c0_g1_m.3952	Lysine histidine transporter-like 8 OS=Arabidopsis thaliana OX=3702 GN=AATL1 PE=1 SV=1	AATL1	0.6601	0.0307592	Down	50.959	5	2	2	1.26299	0.98998	0.989046	0.726723	0.699916		1.31377	0.995674	1.0219	plasma membrane									E	KOG1303	Amino acid transporters
TRINITY_DN1742_c0_g2_m.3900	ABSCISIC ACID-INSENSITIVE 5-like protein 5 OS=Arabidopsis thaliana OX=3702 GN=ABF2 PE=1 SV=1	ABF2	2.2512	0.00125379	Up	38.295	21.3	5	5	0.528772	0.682162	0.493656	1.22038	1.31667	1.30036	0.889439	1.36109	1.20747	nucleus	K14432	ABF; ABA responsive element binding factor	map04075 Plant hormone signal transduction	GO:0001101 response to acid chemical; GO:0006355 regulation of transcription, DNA-templated; GO:0006950 response to stress; GO:0006970 response to osmotic stress; GO:0007154 cell communication; GO:0007165 signal transduction; GO:0009414 response to water deprivation; GO:0009415 response to water; GO:0009628 response to abiotic stimulus; GO:0009651 response to salt stress; GO:0009719 response to e…	GO:0005622 intracellular; GO:0005623 cell; GO:0005634 nucleus; GO:0043226 organelle; GO:0043227 membrane-bounded organelle; GO:0043229 intracellular organelle; GO:0043231 intracellular membrane-bounded organelle;	GO:0000976 transcription regulatory region sequence-specific DNA binding; GO:0001067 regulatory region nucleic acid binding; GO:0003676 nucleic acid binding; GO:0003677 DNA binding; GO:0003690 double-stranded DNA binding; GO:0003700 DNA-binding transcription factor activity; GO:0005488 binding; GO:0043565 sequence-specific DNA binding; GO:0097159 organic cyclic compound binding; GO:0140110 transc…
TRINITY_DN17448_c1_g1_m.3922	Squamous cell carcinoma antigen recognized by T-cells 3 OS=Danio rerio OX=7955 GN=sart3 PE=2 SV=1	sart3	1.9968	6.76186e-06	Up	92.47	34.8	21	21	0.748049	0.702708	0.73136	1.43217	1.49113	1.43392	0.816205	0.850015	0.794442	nucleus	K22611	SART3, TIP110; squamous cell carcinoma antigen recognized by T-cells 3					PF00076	RNA recognition motif. (a.k.a. RRM, RBD, or RNP domain)	A	KOG0128	RNA-binding protein SART3 (RRM superfamily)
TRINITY_DN1751_c1_g1_m.3967	Probable leucine-rich repeat receptor-like protein kinase At1g35710 OS=Arabidopsis thaliana OX=3702 GN=At1g35710 PE=1 SV=1	At1g35710	0.6438	0.00533078	Down	37.247	13.4	4	4	1.38881	1.35498	1.45061	1.0159	0.774867	0.90966	0.484848	0.718585	0.901737	extracellular									T	KOG0619	FOG: Leucine rich repeat
TRINITY_DN1764_c0_g1_m.3997	Protein CDI OS=Arabidopsis thaliana OX=3702 GN=CDI PE=2 SV=1	CDI	0.5719	4.55383e-06	Down	30.015	37.2	10	10	1.56549	1.51561	1.55505	0.860513	0.894401	0.896334	0.578871	0.561662	0.572075	cytoplasm				GO:0000003 reproduction; GO:0000902 cell morphogenesis; GO:0000904 cell morphogenesis involved in differentiation; GO:0003006 developmental process involved in reproduction; GO:0009653 anatomical structure morphogenesis; GO:0009826 unidimensional cell growth; GO:0009846 pollen germination; GO:0009856 pollination; GO:0009860 pollen tube growth; GO:0009932 cell tip growth; GO:0009987 cellular proce…	GO:0005622 intracellular; GO:0005623 cell; GO:0005737 cytoplasm; GO:0005829 cytosol;
TRINITY_DN1777_c0_g1_m.4051	28 kDa heat- and acid-stable phosphoprotein [Morus notabilis]	--	2.1538	0.00140889	Up	18.842	15.5	3	3	0.749892	0.797018	0.810453	1.46474	1.60572	2.00689	0.51211	0.448308	0.604869	nucleus							PF10252	Casein kinase substrate phosphoprotein PP28	S	KOG3375	Phosphoprotein/predicted coiled-coil protein
TRINITY_DN17867_c0_g1_m.4092	Stress-response A/B barrel domain-containing protein At5g22580 OS=Arabidopsis thaliana OX=3702 GN=At5g22580 PE=1 SV=1	At5g22580	0.6546	5.5619e-08	Down	11.844	62.9	6	6	1.30495	1.30757	1.2931	0.855481	0.85261	0.848554	0.886201	0.835245	0.816284	cytoplasm					GO:0005622 intracellular; GO:0005623 cell; GO:0005737 cytoplasm; GO:0009507 chloroplast; GO:0009536 plastid; GO:0043226 organelle; GO:0043227 membrane-bounded organelle; GO:0043229 intracellular organelle; GO:0043231 intracellular membrane-bounded organelle;		PF07876	Stress responsive A/B Barrel Domain
TRINITY_DN179_c0_g1_m.4156	60S ribosomal protein L35a-3 OS=Arabidopsis thaliana OX=3702 GN=RPL35AC PE=3 SV=1	RPL35AC	1.7256	0.000190356	Up	12.952	40.2	5	5	0.684739	0.717734	0.715055	1.2339	1.13119	1.28898	1.1687	0.990061	1.06964	cytoplasm	K02917	RP-L35Ae, RPL35A; large subunit ribosomal protein L35Ae	map03010 Ribosome	GO:0000003 reproduction; GO:0000184 nuclear-transcribed mRNA catabolic process, nonsense-mediated decay; GO:0000956 nuclear-transcribed mRNA catabolic process; GO:0002181 cytoplasmic translation; GO:0003006 developmental process involved in reproduction; GO:0006139 nucleobase-containing compound metabolic process; GO:0006364 rRNA processing; GO:0006396 RNA processing; GO:0006401 RNA catabolic pro…	GO:0005622 intracellular; GO:0005623 cell; GO:0005737 cytoplasm; GO:0005829 cytosol; GO:0005840 ribosome; GO:0009507 chloroplast; GO:0009536 plastid; GO:0015934 large ribosomal subunit; GO:0022625 cytosolic large ribosomal subunit; GO:0022626 cytosolic ribosome; GO:0032991 protein-containing complex; GO:0043226 organelle; GO:0043227 membrane-bounded organelle; GO:0043228 non-membrane-bounded orga…	GO:0003676 nucleic acid binding; GO:0003723 RNA binding; GO:0003735 structural constituent of ribosome; GO:0003824 catalytic activity; GO:0004518 nuclease activity; GO:0004519 endonuclease activity; GO:0005198 structural molecule activity; GO:0005488 binding; GO:0008270 zinc ion binding; GO:0016787 hydrolase activity; GO:0016788 hydrolase activity, acting on ester bonds; GO:0019843 rRNA binding; …	PF01247	Ribosomal protein L35Ae	J	KOG0887	60S ribosomal protein L35A/L37
TRINITY_DN1798_c0_g1_m.4154	NADH dehydrogenase [ubiquinone] 1 alpha subcomplex subunit 8-B OS=Arabidopsis thaliana OX=3702 GN=At5g18800 PE=1 SV=1	At5g18800	0.5642	0.00484322	Down	12.065	49.1	3	3	0.791994	1.00839	0.799154	0.430309	0.526894	0.50956	2.04349	1.44998	1.44023	chloroplast	K03952	NDUFA8; NADH dehydrogenase (ubiquinone) 1 alpha subcomplex subunit 8	map00190 Oxidative phosphorylation; map01100 Metabolic pathways		GO:0005622 intracellular; GO:0005623 cell; GO:0005737 cytoplasm; GO:0005739 mitochondrion; GO:0005740 mitochondrial envelope; GO:0005743 mitochondrial inner membrane; GO:0005746 mitochondrial respirasome; GO:0005747 mitochondrial respiratory chain complex I; GO:0009536 plastid; GO:0016020 membrane; GO:0019866 organelle inner membrane; GO:0030964 NADH dehydrogenase complex; GO:0031090 organelle me…		PF06747	CHCH domain	C	KOG3458	NADH:ubiquinone oxidoreductase, NDUFA8/PGIV/19 kDa subunit
TRINITY_DN1799_c0_g1_m.4155	Amidase 1 OS=Arabidopsis thaliana OX=3702 GN=AMI1 PE=1 SV=1	AMI1	0.6153	0.000127644	Down	46.316	34.5	10	10	1.15086	1.21102	1.27262	0.721643	0.755524	0.75898	1.07417	0.975693	1.07949	cytoplasm	K01426	E3.5.1.4, amiE; amidase [EC:3.5.1.4]	map00330 Arginine and proline metabolism; map00360 Phenylalanine metabolism; map00380 Tryptophan metabolism; map01100 Metabolic pathways	GO:0006082 organic acid metabolic process; GO:0006725 cellular aromatic compound metabolic process; GO:0006807 nitrogen compound metabolic process; GO:0008152 metabolic process; GO:0009058 biosynthetic process; GO:0009683 indoleacetic acid metabolic process; GO:0009684 indoleacetic acid biosynthetic process; GO:0009850 auxin metabolic process; GO:0009851 auxin biosynthetic process; GO:0009987 cel…	GO:0005622 intracellular; GO:0005623 cell; GO:0005634 nucleus; GO:0005654 nucleoplasm; GO:0005737 cytoplasm; GO:0005829 cytosol; GO:0031974 membrane-enclosed lumen; GO:0031981 nuclear lumen; GO:0043226 organelle; GO:0043227 membrane-bounded organelle; GO:0043229 intracellular organelle; GO:0043231 intracellular membrane-bounded organelle; GO:0043233 organelle lumen; GO:0070013 intracellular organ…	GO:0003824 catalytic activity; GO:0004040 amidase activity; GO:0016787 hydrolase activity; GO:0016810 hydrolase activity, acting on carbon-nitrogen (but not peptide) bonds; GO:0016811 hydrolase activity, acting on carbon-nitrogen (but not peptide) bonds, in linear amides; GO:0043864 indoleacetamide hydrolase activity;			J	KOG1211	Amidases
TRINITY_DN1802_c0_g1_m.4174	Probable O-methyltransferase 3 OS=Humulus lupulus OX=3486 GN=OMT3 PE=2 SV=1	OMT3	0.4039	2.22269e-05	Down	45.205	20.8	6	6	1.64368	1.54256	1.54315	0.59855	0.63889	0.672954	0.768081	0.785331	0.806803	cytoplasm	K16040	ROMT; trans-resveratrol di-O-methyltransferase [EC:2.1.1.240]	map00945 Stilbenoid, diarylheptanoid and gingerol biosynthesis	GO:0006807 nitrogen compound metabolic process; GO:0008152 metabolic process; GO:0009058 biosynthetic process; GO:0009812 flavonoid metabolic process; GO:0009820 alkaloid metabolic process; GO:0009821 alkaloid biosynthetic process; GO:0009987 cellular process; GO:0032259 methylation; GO:0034641 cellular nitrogen compound metabolic process; GO:0044237 cellular metabolic process; GO:0044249 cellula…	GO:0005622 intracellular; GO:0005623 cell; GO:0005737 cytoplasm;	GO:0003824 catalytic activity; GO:0005488 binding; GO:0005515 protein binding; GO:0008168 methyltransferase activity; GO:0008171 O-methyltransferase activity; GO:0008757 S-adenosylmethionine-dependent methyltransferase activity; GO:0016740 transferase activity; GO:0016741 transferase activity, transferring one-carbon groups; GO:0030761 8-hydroxyquercitin 8-O-methyltransferase activity; GO:0030766…	PF08100; PF00891	Dimerisation domain; O-methyltransferase	S	KOG3178	Hydroxyindole-O-methyltransferase and related SAM-dependent methyltransferases
TRINITY_DN1803_c0_g1_m.4175	Probable inactive receptor kinase At1g48480 OS=Arabidopsis thaliana OX=3702 GN=RKL1 PE=1 SV=1	RKL1	0.6279	0.00440565	Down	70.208	10.9	5	5	1.45761	1.20252	1.2468	0.807207	0.746044	0.899725	0.605486	1.31915	0.715463	extracellular	K04733	IRAK4; interleukin-1 receptor-associated kinase 4 [EC:2.7.11.1]		GO:0001101 response to acid chemical; GO:0009605 response to external stimulus; GO:0009607 response to biotic stimulus; GO:0009608 response to symbiont; GO:0009610 response to symbiotic fungus; GO:0009620 response to fungus; GO:0009719 response to endogenous stimulus; GO:0009725 response to hormone; GO:0009737 response to abscisic acid; GO:0010033 response to organic substance; GO:0033993 respons…	GO:0005618 cell wall; GO:0005622 intracellular; GO:0005623 cell; GO:0005737 cytoplasm; GO:0005773 vacuole; GO:0005774 vacuolar membrane; GO:0005886 plasma membrane; GO:0005911 cell-cell junction; GO:0009505 plant-type cell wall; GO:0009506 plasmodesma; GO:0016020 membrane; GO:0030054 cell junction; GO:0030312 external encapsulating structure; GO:0031090 organelle membrane; GO:0031224 intrinsic co…		PF00069	Protein kinase domain
TRINITY_DN18084_c0_g1_m.4190	uncharacterized protein LOC21402006 [Morus notabilis]	--	0.6294	0.000124715	Down	26.662	26.2	4	4	1.12841	1.18244	1.19902	0.770978	0.705753	0.7325	1.05883	1.13509	1.08698	cytoskeleton
TRINITY_DN1813_c0_g2_m.4201	Protein DMR6-LIKE OXYGENASE 2 OS=Arabidopsis thaliana OX=3702 GN=DLO2 PE=2 SV=1	DLO2	1.7384	0.0362537	Up	41.819	18.4	5	5	0.703939	0.418166	0.49007	0.852076	1.12581	0.824698	1.4407	1.57051	1.57403	chloroplast							PF03171	2OG-Fe(II) oxygenase superfamily	Q	KOG0143	Iron/ascorbate family oxidoreductases
TRINITY_DN182_c0_g1_m.4249	Hypersensitive-induced response protein 4 OS=Arabidopsis thaliana OX=3702 GN=HIR4 PE=1 SV=1	HIR4	0.5527	1.46405e-05	Down	19.731	48.3	7	7	1.5132	1.51119	1.52663	0.854495	0.860842	0.799995	0.575645	0.676712	0.681289	cytoplasm					GO:0005622 intracellular; GO:0005623 cell; GO:0005737 cytoplasm; GO:0005773 vacuole; GO:0005774 vacuolar membrane; GO:0005794 Golgi apparatus; GO:0005886 plasma membrane; GO:0005911 cell-cell junction; GO:0009506 plasmodesma; GO:0012505 endomembrane system; GO:0016020 membrane; GO:0030054 cell junction; GO:0031090 organelle membrane; GO:0043226 organelle; GO:0043227 membrane-bounded organelle; GO…				C	KOG2620	Prohibitins and stomatins of the PID superfamily
TRINITY_DN184_c1_g1_m.4314	Serine/threonine-protein kinase Nek6 OS=Arabidopsis thaliana OX=3702 GN=NEK6 PE=3 SV=1	NEK6	0.5306	0.0171657	Down	36.655	20.9	5	5	1.18799	1.48408	1.51419	0.547448	0.891457	0.782186		0.852539	0.74011	nucleus	K08857	NEK1_4_5; NIMA (never in mitosis gene a)-related kinase 1/4/5 [EC:2.7.11.1]			GO:0005622 intracellular; GO:0005623 cell; GO:0005737 cytoplasm;				T	KOG0589	Serine/threonine protein kinase
TRINITY_DN18602_c0_g1_m.4346	Acetyl-coenzyme A carboxylase carboxyl transferase subunit alpha, chloroplastic OS=Arabidopsis thaliana OX=3702 GN=CAC3 PE=1 SV=1	CAC3	0.5811	2.28305e-05	Down	82.518	28.9	16	15	1.28556	1.28436	1.23454	0.765548	0.715794	0.729282	0.967406	0.98858	1.02892	chloroplast	K01962	accA; acetyl-CoA carboxylase carboxyl transferase subunit alpha [EC:6.4.1.2 2.1.3.15]	map00061 Fatty acid biosynthesis; map00620 Pyruvate metabolism; map00640 Propanoate metabolism; map01100 Metabolic pathways; map01110 Biosynthesis of secondary metabolites; map01200 Carbon metabolism; map01212 Fatty acid metabolism
TRINITY_DN1869_c0_g1_m.4388	Receptor protein kinase TMK1 OS=Arabidopsis thaliana OX=3702 GN=TMK1 PE=1 SV=1	TMK1	0.6169	3.45471e-05	Down	102.94	18.4	11	10	1.30976	1.40022	1.35829	0.820408	0.859163	0.830329	0.760247	0.810487	0.851099	plasma membrane	K00924	E2.7.1.-; kinase [EC:2.7.1.-]		GO:0006464 cellular protein modification process; GO:0006468 protein phosphorylation; GO:0006793 phosphorus metabolic process; GO:0006796 phosphate-containing compound metabolic process; GO:0006807 nitrogen compound metabolic process; GO:0007154 cell communication; GO:0007165 signal transduction; GO:0007166 cell surface receptor signaling pathway; GO:0007167 enzyme linked receptor protein signali…	GO:0005576 extracellular region; GO:0005623 cell; GO:0005886 plasma membrane; GO:0016020 membrane; GO:0071944 cell periphery;	GO:0003824 catalytic activity; GO:0004672 protein kinase activity; GO:0004674 protein serine/threonine kinase activity; GO:0004675 transmembrane receptor protein serine/threonine kinase activity; GO:0004888 transmembrane signaling receptor activity; GO:0016301 kinase activity; GO:0016740 transferase activity; GO:0016772 transferase activity, transferring phosphorus-containing groups; GO:0016773 p…	PF00069	Protein kinase domain
TRINITY_DN18777_c0_g1_m.4421	Protein TIC 22-like, chloroplastic OS=Arabidopsis thaliana OX=3702 GN=TIC22L PE=3 SV=1	TIC22L	1.537	0.000432548	Up	37.92	35.4	8	8	0.744312	0.837621	0.823969	1.25643	1.24786	1.19363	1.08146	0.914659	0.900052	chloroplast					GO:0005622 intracellular; GO:0005623 cell; GO:0005737 cytoplasm; GO:0009536 plastid; GO:0043226 organelle; GO:0043227 membrane-bounded organelle; GO:0043229 intracellular organelle; GO:0043231 intracellular membrane-bounded organelle;
TRINITY_DN188_c0_g1_m.4471	nodulin-related protein 1 [Morus notabilis]	--	0.4703	0.000513239	Down	14.927	69.7	7	7	1.48059	1.72372	1.46363	0.807347	0.681922	0.705918	0.650613	0.712946	0.773315	mitochondria
TRINITY_DN1882_c0_g1_m.4454	uncharacterized protein LOC21395995 [Morus notabilis]	--	2.5887	5.41215e-09	Up	30.569	71.2	17	17	0.322791	0.322824	0.319194	0.83551	0.826526	0.835584	1.89658	1.82471	1.81628	nucleus
TRINITY_DN18959_c0_g1_m.4485	uncharacterized protein LOC21408358 [Morus notabilis]	--	0.2719	0.0231465	Down	20.381	17.2	2	2	1.65513	1.86861	1.90027	0.633345	0.647593	0.194043	0.101012			vacuolar membrane
TRINITY_DN1925_c2_g1_m.4603	Peptidyl serine alpha-galactosyltransferase OS=Arabidopsis thaliana OX=3702 GN=SERGT1 PE=2 SV=1	SERGT1	0.4868	0.0188576	Down	92.648	9.7	6	6	1.32351	1.97345	1.10353	0.635956	0.778687	0.727486	0.796444	0.816273	0.844666	cytoplasm	K20781	SGT1; peptidyl serine alpha-galactosyltransferase [EC:2.4.1.-]	map00514 Other types of O-glycan biosynthesis
TRINITY_DN193_c0_g1_m.4666	16 kDa phloem protein 2 OS=Arabidopsis thaliana OX=3702 GN=PP16-2 PE=1 SV=1	PP16-2	0.503	0.00712538	Down	27.14	18.5	4	4	1.03904	0.966842	1.41802	0.504359	0.617587	0.600271	1.2133	1.2743	1.36627	extracellular							PF00168	C2 domain	S	KOG1030	Predicted Ca2+-dependent phospholipid-binding protein
TRINITY_DN1930_c0_g1_m.4626	late embryogenesis abundant protein, group 3 [Morus notabilis]	--	1.8581	2.02612e-06	Up	28.039	33.6	10	10	0.656144	0.687306	0.676569	1.25786	1.23578	1.25972	1.07235	1.04178	1.1125	chloroplast									S	KOG4744	Uncharacterized conserved protein
TRINITY_DN19358_c0_g1_m.4647	AT-hook motif nuclear-localized protein 6 OS=Arabidopsis thaliana OX=3702 GN=AHL6 PE=2 SV=1	AHL6	0.4195	0.0129544	Down	36.383	36.1	6	6	1.51695	1.61369	1.6192	0.425258	0.873887	0.693503		0.400907	0.856612	nucleus							PF03479	Domain of unknown function (DUF296)
TRINITY_DN1940_c0_g1_m.4670	Pathogenesis-related protein P2 OS=Solanum lycopersicum OX=4081 PE=2 SV=1	--	2.9442	6.665e-07	Up	16.569	50.3	4	4	0.354665	0.355852	0.370042	1.08725	1.0593	1.03486	1.65546	1.54049	1.54208	chloroplast							PF00967	Barwin family	S	KOG4742	Predicted chitinase
TRINITY_DN1948_c0_g2_m.4684	ABC transporter C family member 2 OS=Arabidopsis thaliana OX=3702 GN=ABCC2 PE=1 SV=2	ABCC2	0.6324	4.62138e-05	Down	183.12	21	25	25	1.19674	1.25342	1.2079	0.755759	0.801853	0.755836	1.00322	1.00905	1.01622	plasma membrane	K05665	ABCC1; ATP-binding cassette, subfamily C (CFTR/MRP), member 1 [EC:7.6.2.3]	map02010 ABC transporters	GO:0006810 transport; GO:0006811 ion transport; GO:0006812 cation transport; GO:0006820 anion transport; GO:0015698 inorganic anion transport; GO:0015700 arsenite transport; GO:0034220 ion transmembrane transport; GO:0042221 response to chemical; GO:0042946 glucoside transport; GO:0046685 response to arsenic-containing substance; GO:0050896 response to stimulus; GO:0051179 localization; GO:005123…	GO:0000325 plant-type vacuole; GO:0005622 intracellular; GO:0005623 cell; GO:0005737 cytoplasm; GO:0005773 vacuole; GO:0005774 vacuolar membrane; GO:0005911 cell-cell junction; GO:0009506 plasmodesma; GO:0016020 membrane; GO:0030054 cell junction; GO:0031090 organelle membrane; GO:0043226 organelle; GO:0043227 membrane-bounded organelle; GO:0043229 intracellular organelle; GO:0043231 intracellula…	GO:0003824 catalytic activity; GO:0005215 transporter activity; GO:0008324 cation transmembrane transporter activity; GO:0008490 arsenite secondary active transmembrane transporter activity; GO:0008509 anion transmembrane transporter activity; GO:0015075 ion transmembrane transporter activity; GO:0015103 inorganic anion transmembrane transporter activity; GO:0015105 arsenite transmembrane transpo…	PF00005	ABC transporter	Q	KOG0054	Multidrug resistance-associated protein/mitoxantrone resistance protein, ABC superfamily
TRINITY_DN1951_c0_g1_m.4703	OTU domain-containing protein 5 OS=Mus musculus OX=10090 GN=Otud5 PE=1 SV=2	Otud5	2.5905	0.00427171	Up	58.359	10.9	3	3		0.467898	0.63126	1.36015	1.37612	1.53473	0.69947	0.870695	1.05967	chloroplast	K12655	OTUD5, DUBA; OTU domain-containing protein 5 [EC:3.4.19.12]							OT	KOG2605	OTU (ovarian tumor)-like cysteine protease
TRINITY_DN196_c0_g1_m.4780	uncharacterized protein LOC112090826 [Morus notabilis]	--	0.2574	8.34297e-07	Down	13.535	32.8	4	4	1.81641	1.96872	1.94164	0.495452	0.495394	0.483206	0.580103	0.590488	0.628595	extracellular
TRINITY_DN1970_c0_g1_m.4783	Protein NPGR2 OS=Arabidopsis thaliana OX=3702 GN=NPGR2 PE=1 SV=1	NPGR2	0.5561	0.0162876	Down	81.991	6.5	3	3	1.03956	1.59135	1.58915	0.773944	0.804466	0.768304	0.739945		0.693274	chloroplast	K21843	TTC7; tetratricopeptide repeat protein 7		GO:0008104 protein localization; GO:0033036 macromolecule localization; GO:0034613 cellular protein localization; GO:0051179 localization; GO:0051641 cellular localization; GO:0070727 cellular macromolecule localization; GO:0072657 protein localization to membrane; GO:0072659 protein localization to plasma membrane; GO:1990778 protein localization to cell periphery;					T	KOG4162	Predicted calmodulin-binding protein
TRINITY_DN1976_c0_g1_m.4809	Protein MOTHER of FT and TFL1 OS=Arabidopsis thaliana OX=3702 GN=MFT PE=1 SV=1	MFT	3.0996	3.2713e-06	Up	19.225	87.6	9	8	0.511734	0.54806	0.497469	1.63417	1.61787	1.57489	0.84797	0.875769	0.892072	cytoplasm	K06910	PEBP1, TFS1; phosphatidylethanolamine-binding protein					PF01161	Phosphatidylethanolamine-binding protein	S	KOG3346	Phosphatidylethanolamine binding protein
TRINITY_DN1989_c0_g2_m.4859	Cytochrome b561 and DOMON domain-containing protein At3g25290 OS=Arabidopsis thaliana OX=3702 GN=At3g25290 PE=2 SV=1	At3g25290	0.579	9.97975e-07	Down	47.224	23	9	9	1.51855	1.48967	1.53724	0.866591	0.884074	0.881174	0.593161	0.628737	0.600794	plasma membrane					GO:0005623 cell; GO:0005886 plasma membrane; GO:0005911 cell-cell junction; GO:0009506 plasmodesma; GO:0016020 membrane; GO:0030054 cell junction; GO:0055044 symplast; GO:0071944 cell periphery;				T	KOG4293	Predicted membrane protein, contains DoH and Cytochrome b-561/ferric reductase transmembrane domains
TRINITY_DN19987_c0_g1_m.4881	uncharacterized protein LOC21409278 [Morus notabilis]	--	0.6476	8.05106e-05	Down	23.31	46.7	8	8	1.09761	1.12997	1.11273	0.756333	0.711646	0.695177	1.18744	1.17537	1.13373	chloroplast
TRINITY_DN201_c0_g1_m.4955	2-methylene-furan-3-one reductase OS=Fragaria ananassa OX=3747 GN=EO PE=1 SV=1	EO	2.0535	2.3916e-06	Up	33.791	65.7	21	19	0.644055	0.617317	0.622099	1.32183	1.2726	1.27337	1.12381	1.07214	1.05278	chloroplast	K18980	EO, FaQR; 2-methylene-furan-3-one reductase [EC:1.3.1.105]					PF08240; PF13602	Alcohol dehydrogenase GroES-like domain; Zinc-binding dehydrogenase	C	KOG1198	Zinc-binding oxidoreductase
TRINITY_DN2017_c0_g1_m.4944	Protein LURP-one-related 15 OS=Arabidopsis thaliana OX=3702 GN=At5g01750 PE=1 SV=1	At5g01750	1.5626	7.75922e-06	Up	22.962	65.9	14	14	0.756051	0.749359	0.767088	1.16037	1.21426	1.1763	1.03991	1.03757	1.09909	cytoplasm				GO:0001101 response to acid chemical; GO:0006950 response to stress; GO:0006952 defense response; GO:0009605 response to external stimulus; GO:0009607 response to biotic stimulus; GO:0009620 response to fungus; GO:0009719 response to endogenous stimulus; GO:0009725 response to hormone; GO:0009751 response to salicylic acid; GO:0010033 response to organic substance; GO:0014070 response to organic …			PF04525	Tubby C 2
TRINITY_DN2019_c0_g1_m.4953	Glycogen phosphorylase 1 OS=Dictyostelium discoideum OX=44689 GN=glpV PE=1 SV=3	glpV	1.575	7.33183e-05	Up	112.29	29.5	19	19	0.778366	0.749588	0.728284	1.14046	1.20104	1.212	1.02765	1.0817	1.08091	chloroplast	K00688	PYG, glgP; glycogen phosphorylase [EC:2.4.1.1]	map00500 Starch and sucrose metabolism; map01100 Metabolic pathways; map01110 Biosynthesis of secondary metabolites	GO:0000272 polysaccharide catabolic process; GO:0005975 carbohydrate metabolic process; GO:0005976 polysaccharide metabolic process; GO:0005977 glycogen metabolic process; GO:0005980 glycogen catabolic process; GO:0006073 cellular glucan metabolic process; GO:0006091 generation of precursor metabolites and energy; GO:0006112 energy reserve metabolic process; GO:0008152 metabolic process; GO:00090…	GO:0005622 intracellular; GO:0005623 cell; GO:0005737 cytoplasm;	GO:0003824 catalytic activity; GO:0004645 1,4-alpha-oligoglucan phosphorylase activity; GO:0005488 binding; GO:0008144 drug binding; GO:0008184 glycogen phosphorylase activity; GO:0016740 transferase activity; GO:0016757 transferase activity, transferring glycosyl groups; GO:0016758 transferase activity, transferring hexosyl groups; GO:0019842 vitamin binding; GO:0030170 pyridoxal phosphate bindi…			G	KOG2099	Glycogen phosphorylase
TRINITY_DN202_c0_g1_m.4976	GDP-L-galactose phosphorylase 1 OS=Arabidopsis thaliana OX=3702 GN=VTC2 PE=1 SV=1	VTC2	2.4563	0.00604298	Up	34.312	8.6	2	2	0.732449	0.743724	0.774276	2.14877		1.53638	0.658493	0.723019	0.682887	cytoplasm	K14190	VTC2_5; GDP-L-galactose phosphorylase [EC:2.7.7.69]	map00053 Ascorbate and aldarate metabolism; map01100 Metabolic pathways; map01110 Biosynthesis of secondary metabolites						S	KOG2720	Predicted hydrolase (HIT family)
TRINITY_DN2030_c0_g1_m.4980	Peptidyl-prolyl cis-trans isomerase NIMA-interacting 4 OS=Mus musculus OX=10090 GN=Pin4 PE=1 SV=1	Pin4	2.4771	1.11121e-06	Up	15.337	46.9	5	5	0.545004	0.551152	0.577842	1.395	1.36755	1.38419	0.990903	1.10682	1.08154	mitochondria	K09579	PIN4; peptidyl-prolyl cis-trans isomerase NIMA-interacting 4 [EC:5.2.1.8]		GO:0006139 nucleobase-containing compound metabolic process; GO:0006364 rRNA processing; GO:0006396 RNA processing; GO:0006725 cellular aromatic compound metabolic process; GO:0006807 nitrogen compound metabolic process; GO:0008152 metabolic process; GO:0009987 cellular process; GO:0010467 gene expression; GO:0016070 RNA metabolic process; GO:0016072 rRNA metabolic process; GO:0022613 ribonucleop…	GO:0005622 intracellular; GO:0005623 cell; GO:0005634 nucleus; GO:0005730 nucleolus; GO:0005737 cytoplasm; GO:0005739 mitochondrion; GO:0005759 mitochondrial matrix; GO:0005819 spindle; GO:0005856 cytoskeleton; GO:0015630 microtubule cytoskeleton; GO:0030684 preribosome; GO:0031974 membrane-enclosed lumen; GO:0031981 nuclear lumen; GO:0032991 protein-containing complex; GO:0043226 organelle; GO:0…	GO:0003676 nucleic acid binding; GO:0003677 DNA binding; GO:0003681 bent DNA binding; GO:0003690 double-stranded DNA binding; GO:0005488 binding; GO:0097159 organic cyclic compound binding; GO:1901363 heterocyclic compound binding;	PF13616	PPIC-type PPIASE domain	O	KOG3258	Parvulin-like peptidyl-prolyl cis-trans isomerase
TRINITY_DN2033_c2_g2_m.4988	CTL-like protein DDB_G0288717 OS=Dictyostelium discoideum OX=44689 GN=DDB_G0288717 PE=3 SV=1	DDB_G0288717	0.475	6.23916e-05	Down	62.348	10.8	5	5	1.49918	1.54709	1.47404	0.745646	0.742097	0.659499	0.717991	0.668677	0.945778	plasma membrane									I	KOG1362	Choline transporter-like protein
TRINITY_DN2045_c0_g1_m.5026	Golgin candidate 6 OS=Arabidopsis thaliana OX=3702 GN=GC6 PE=1 SV=2	GC6	1.6851	3.0506e-06	Up	100.36	26.1	16	16	0.748493	0.754795	0.760359	1.25109	1.30493	1.25838	0.968495	0.987376	0.966083	chloroplast				GO:0006810 transport; GO:0006886 intracellular protein transport; GO:0006888 endoplasmic reticulum to Golgi vesicle-mediated transport; GO:0007275 multicellular organism development; GO:0008104 protein localization; GO:0009791 post-embryonic development; GO:0009987 cellular process; GO:0015031 protein transport; GO:0015833 peptide transport; GO:0016043 cellular component organization; GO:0016192 …	GO:0005622 intracellular; GO:0005623 cell; GO:0005737 cytoplasm; GO:0005783 endoplasmic reticulum; GO:0005794 Golgi apparatus; GO:0005795 Golgi stack; GO:0005798 Golgi-associated vesicle; GO:0005829 cytosol; GO:0012505 endomembrane system; GO:0012506 vesicle membrane; GO:0012507 ER to Golgi transport vesicle membrane; GO:0016020 membrane; GO:0030133 transport vesicle; GO:0030134 COPII-coated ER t…	GO:0005215 transporter activity;			U	KOG0946	ER-Golgi vesicle-tethering protein p115
TRINITY_DN2054_c0_g2_m.5046	Metal transporter Nramp3 OS=Arabidopsis thaliana OX=3702 GN=NRAMP3 PE=1 SV=2	NRAMP3	0.6295	0.00388202	Down	56.714	17.8	5	5	1.36697	1.30219	1.33133	0.738228	0.961342	0.818695	0.952328	0.847754	0.68116	plasma membrane	K21398	SLC11A2, DMT1, NRAMP2; natural resistance-associated macrophage protein 2		GO:0000041 transition metal ion transport; GO:0001558 regulation of cell growth; GO:0006810 transport; GO:0006811 ion transport; GO:0006812 cation transport; GO:0006828 manganese ion transport; GO:0006950 response to stress; GO:0006952 defense response; GO:0007275 multicellular organism development; GO:0009605 response to external stimulus; GO:0009607 response to biotic stimulus; GO:0009617 respo…	GO:0005622 intracellular; GO:0005623 cell; GO:0005737 cytoplasm; GO:0005773 vacuole; GO:0005774 vacuolar membrane; GO:0005794 Golgi apparatus; GO:0005802 trans-Golgi network; GO:0005911 cell-cell junction; GO:0009506 plasmodesma; GO:0012505 endomembrane system; GO:0016020 membrane; GO:0030054 cell junction; GO:0031090 organelle membrane; GO:0031984 organelle subcompartment; GO:0043226 organelle; …	GO:0005215 transporter activity; GO:0005384 manganese ion transmembrane transporter activity; GO:0008324 cation transmembrane transporter activity; GO:0015075 ion transmembrane transporter activity; GO:0015318 inorganic molecular entity transmembrane transporter activity; GO:0022857 transmembrane transporter activity; GO:0022890 inorganic cation transmembrane transporter activity; GO:0046873 meta…			P	KOG1291	Mn2+ and Fe2+ transporters of the NRAMP family
TRINITY_DN2062_c3_g1_m.5079	Ribulose bisphosphate carboxylase small chain, chloroplastic OS=Silene latifolia subsp. alba OX=52853 GN=RBCS PE=2 SV=1	RBCS	0.3444	0.00029662	Down	20.394	46.2	8	8	2.36449	1.96949	1.84325	0.756957	0.640299	0.730219	0.244251	0.253681	0.197364	chloroplast	K01602	rbcS; ribulose-bisphosphate carboxylase small chain [EC:4.1.1.39]	map00630 Glyoxylate and dicarboxylate metabolism; map00710 Carbon fixation in photosynthetic organisms; map01100 Metabolic pathways; map01110 Biosynthesis of secondary metabolites; map01200 Carbon metabolism		GO:0005622 intracellular; GO:0005623 cell; GO:0005737 cytoplasm; GO:0009507 chloroplast; GO:0009536 plastid; GO:0043226 organelle; GO:0043227 membrane-bounded organelle; GO:0043229 intracellular organelle; GO:0043231 intracellular membrane-bounded organelle;		PF00101	Ribulose bisphosphate carboxylase, small chain
TRINITY_DN2065_c1_g1_m.5087	AFG1-like ATPase OS=Homo sapiens OX=9606 GN=AFG1L PE=1 SV=2	AFG1L	1.5777	0.0111365	Up	34.374	31	7	7	0.547535	0.629417	0.683994	0.991472	1.10249	0.842116	1.35906	1.38711	1.45681	chloroplast	K18798	AFG1, LACE1; peroxisome-assembly ATPase [EC:3.6.4.7]							S	KOG2383	Predicted ATPase
TRINITY_DN2076_c1_g1_m.5136	Probable nucleoredoxin 2 OS=Oryza sativa subsp. japonica OX=39947 GN=Os01g0794400 PE=2 SV=1	Os01g0794400	2.7751	1.64465e-05	Up	34.715	24.9	7	7	0.450518	0.483619	0.448566	1.36475	1.22129	1.25108	1.30447	1.26451	1.21119	cytoplasm	K17609	NXN; nucleoredoxin [EC:1.8.1.8]					PF13905	Thioredoxin-like	O	KOG2501	Thioredoxin, nucleoredoxin and related proteins
TRINITY_DN20771_c0_g1_m.5138	uncharacterized protein LOC21388605 [Morus notabilis]	--	0.3391	0.000983064	Down	50.335	17.9	5	5	1.87578	2.12168	1.97296	0.602559	0.575654	0.846195	0.278257	0.365948	0.360957	nucleus				GO:0008152 metabolic process; GO:0032259 methylation;	GO:0005622 intracellular; GO:0005623 cell; GO:0005737 cytoplasm; GO:0005768 endosome; GO:0005794 Golgi apparatus; GO:0005802 trans-Golgi network; GO:0012505 endomembrane system; GO:0031410 cytoplasmic vesicle; GO:0031982 vesicle; GO:0031984 organelle subcompartment; GO:0043226 organelle; GO:0043227 membrane-bounded organelle; GO:0043229 intracellular organelle; GO:0043231 intracellular membrane-b…	GO:0003824 catalytic activity; GO:0008168 methyltransferase activity; GO:0008757 S-adenosylmethionine-dependent methyltransferase activity; GO:0016740 transferase activity; GO:0016741 transferase activity, transferring one-carbon groups;
TRINITY_DN208_c0_g1_m.5173	28 kDa ribonucleoprotein, chloroplastic OS=Nicotiana sylvestris OX=4096 PE=1 SV=1	--	1.6062	1.54079e-05	Up	34.582	33.4	9	8	0.826774	0.864537	0.875068	1.39249	1.35446	1.37505	0.767814	0.766942	0.776869	chloroplast	K11294	NCL, NSR1; nucleolin					PF00076	RNA recognition motif. (a.k.a. RRM, RBD, or RNP domain)	A	KOG0118	FOG: RRM domain
TRINITY_DN2087_c0_g1_m.5164	uncharacterized protein LOC21401528 isoform X2 [Morus notabilis]	--	1.678	2.00639e-05	Up	19.806	65.7	9	9	0.589115	0.577953	0.601364	0.952022	1.00551	1.00998	1.43077	1.43297	1.40032	cytoplasm							PF00582	Universal stress protein family
TRINITY_DN2089_c0_g2_m.5169	Activating signal cointegrator 1 OS=Mus musculus OX=10090 GN=Trip4 PE=1 SV=2	Trip4	1.6666	0.0101575	Up	48.378	16.5	5	5	0.849051	0.594333	0.752896	1.31189	1.21925	1.12911	0.822903	1.20392	1.11665	nucleus	K23398	TRIP4; activating signal cointegrator 1		GO:0006355 regulation of transcription, DNA-templated; GO:0006810 transport; GO:0007154 cell communication; GO:0007165 signal transduction; GO:0009719 response to endogenous stimulus; GO:0009725 response to hormone; GO:0009755 hormone-mediated signaling pathway; GO:0009889 regulation of biosynthetic process; GO:0009891 positive regulation of biosynthetic process; GO:0009893 positive regulation of…	GO:0005622 intracellular; GO:0005623 cell; GO:0005634 nucleus; GO:0005654 nucleoplasm; GO:0005737 cytoplasm; GO:0016604 nuclear body; GO:0031594 neuromuscular junction; GO:0031974 membrane-enclosed lumen; GO:0031981 nuclear lumen; GO:0032991 protein-containing complex; GO:0043226 organelle; GO:0043227 membrane-bounded organelle; GO:0043229 intracellular organelle; GO:0043231 intracellular membran…	GO:0002020 protease binding; GO:0003712 transcription coregulator activity; GO:0003713 transcription coactivator activity; GO:0005102 signaling receptor binding; GO:0005488 binding; GO:0005515 protein binding; GO:0008134 transcription factor binding; GO:0016922 nuclear receptor binding; GO:0019899 enzyme binding; GO:0019900 kinase binding; GO:0019901 protein kinase binding; GO:0030331 estrogen re…	PF06221	Putative zinc finger motif, C2HC5-type	K	KOG2845	Activating signal cointegrator 1
TRINITY_DN2090_c0_g1_m.5177	Protein STRICTOSIDINE SYNTHASE-LIKE 4 OS=Arabidopsis thaliana OX=3702 GN=SSL4 PE=1 SV=1	SSL4	2.2686	4.95771e-06	Up	41.608	34.6	12	12	0.470555	0.478654	0.497352	1.10146	1.12446	1.05582	1.41552	1.45972	1.39646	cytoplasm					GO:0005622 intracellular; GO:0005623 cell; GO:0005737 cytoplasm; GO:0005783 endoplasmic reticulum; GO:0012505 endomembrane system; GO:0016020 membrane; GO:0043226 organelle; GO:0043227 membrane-bounded organelle; GO:0043229 intracellular organelle; GO:0043231 intracellular membrane-bounded organelle;	GO:0003824 catalytic activity; GO:0016787 hydrolase activity; GO:0016788 hydrolase activity, acting on ester bonds;			J	KOG1520	Predicted alkaloid synthase/Surface mucin Hemomucin
TRINITY_DN2103_c0_g2_m.5219	G-type lectin S-receptor-like serine/threonine-protein kinase At2g19130 OS=Arabidopsis thaliana OX=3702 GN=At2g19130 PE=2 SV=1	At2g19130	1.8792	1.92721e-06	Up	91.078	15.2	8	7	0.626594	0.643397	0.659496	1.20742	1.20348	1.21498	1.13481	1.13435	1.17546	plasma membrane				GO:0006464 cellular protein modification process; GO:0006468 protein phosphorylation; GO:0006793 phosphorus metabolic process; GO:0006796 phosphate-containing compound metabolic process; GO:0006807 nitrogen compound metabolic process; GO:0008152 metabolic process; GO:0009987 cellular process; GO:0016310 phosphorylation; GO:0019538 protein metabolic process; GO:0036211 protein modification process…	GO:0005623 cell; GO:0005886 plasma membrane; GO:0016020 membrane; GO:0071944 cell periphery;	GO:0003824 catalytic activity; GO:0004672 protein kinase activity; GO:0004674 protein serine/threonine kinase activity; GO:0005488 binding; GO:0005515 protein binding; GO:0005516 calmodulin binding; GO:0016301 kinase activity; GO:0016740 transferase activity; GO:0016772 transferase activity, transferring phosphorus-containing groups; GO:0016773 phosphotransferase activity, alcohol group as accept…	PF01453; PF00954; PF08276; PF00069	D-mannose binding lectin; S-locus glycoprotein family; PAN-like domain; Protein kinase domain
TRINITY_DN21085_c0_g1_m.5234	uncharacterized protein LOC21405841 [Morus notabilis]	--	1.5883	9.03491e-06	Up	36.825	52.1	14	14	0.862034	0.856576	0.881802	1.33954	1.39805	1.39253	0.749412	0.772176	0.747881	chloroplast									S	KOG0154	RNA-binding protein RBM5 and related proteins, contain G-patch and RRM domains
TRINITY_DN211_c1_g2_m.5338	L-ascorbate peroxidase 3 OS=Arabidopsis thaliana OX=3702 GN=APX3 PE=1 SV=1	APX3	0.6227	0.000112827	Down	31.56	45.3	13	9	1.10162	1.15722	1.12837	0.735453	0.667617	0.706275	1.12123	1.15939	1.22284	chloroplast	K00434	E1.11.1.11; L-ascorbate peroxidase [EC:1.11.1.11]	map00053 Ascorbate and aldarate metabolism; map00480 Glutathione metabolism; map01100 Metabolic pathways	GO:0000302 response to reactive oxygen species; GO:0006950 response to stress; GO:0006979 response to oxidative stress; GO:0008152 metabolic process; GO:0009056 catabolic process; GO:0009636 response to toxic substance; GO:0009719 response to endogenous stimulus; GO:0009725 response to hormone; GO:0009735 response to cytokinin; GO:0009987 cellular process; GO:0010033 response to organic substance…	GO:0005622 intracellular; GO:0005623 cell; GO:0005737 cytoplasm; GO:0005739 mitochondrion; GO:0005773 vacuole; GO:0005774 vacuolar membrane; GO:0005777 peroxisome; GO:0005778 peroxisomal membrane; GO:0005911 cell-cell junction; GO:0009506 plasmodesma; GO:0009507 chloroplast; GO:0009526 plastid envelope; GO:0009536 plastid; GO:0009941 chloroplast envelope; GO:0016020 membrane; GO:0030054 cell junc…	GO:0003824 catalytic activity; GO:0004130 cytochrome-c peroxidase activity; GO:0004601 peroxidase activity; GO:0016209 antioxidant activity; GO:0016491 oxidoreductase activity; GO:0016684 oxidoreductase activity, acting on peroxide as acceptor; GO:0016688 L-ascorbate peroxidase activity;	PF00141	Peroxidase
TRINITY_DN2112_c0_g2_m.5281	Abscisic acid receptor PYL9 OS=Arabidopsis thaliana OX=3702 GN=PYL9 PE=1 SV=1	PYL9	2.6765	0.000112304	Up	17.056	39.6	5	3	0.450807	0.488043	0.542512	1.32124	1.23655	1.40705	1.25425	1.16821	1.13134	cytoplasm	K14496	PYL; abscisic acid receptor PYR/PYL family	map04016 MAPK signaling pathway - plant; map04075 Plant hormone signal transduction	GO:0001101 response to acid chemical; GO:0006950 response to stress; GO:0006970 response to osmotic stress; GO:0007154 cell communication; GO:0007165 signal transduction; GO:0007275 multicellular organism development; GO:0009266 response to temperature stimulus; GO:0009409 response to cold; GO:0009414 response to water deprivation; GO:0009415 response to water; GO:0009628 response to abiotic stim…	GO:0005622 intracellular; GO:0005623 cell; GO:0005634 nucleus; GO:0005737 cytoplasm; GO:0005829 cytosol; GO:0043226 organelle; GO:0043227 membrane-bounded organelle; GO:0043229 intracellular organelle; GO:0043231 intracellular membrane-bounded organelle;	GO:0005488 binding; GO:0008289 lipid binding; GO:0010427 abscisic acid binding; GO:0019840 isoprenoid binding; GO:0031406 carboxylic acid binding; GO:0033293 monocarboxylic acid binding; GO:0036094 small molecule binding; GO:0042562 hormone binding; GO:0043167 ion binding; GO:0043168 anion binding; GO:0043177 organic acid binding; GO:0043178 alcohol binding;
TRINITY_DN2114_c2_g1_m.5296	Probable inactive purple acid phosphatase 29 OS=Arabidopsis thaliana OX=3702 GN=PAP29 PE=2 SV=1	PAP29	1.5728	4.9574e-05	Up	28.767	39.7	7	7	0.724594	0.701773	0.689022	1.1348	1.06661	1.12569	1.18575	1.15333	1.21843	nucleus				GO:0006793 phosphorus metabolic process; GO:0006796 phosphate-containing compound metabolic process; GO:0008152 metabolic process; GO:0009987 cellular process; GO:0016311 dephosphorylation; GO:0044237 cellular metabolic process;		GO:0003824 catalytic activity; GO:0003993 acid phosphatase activity; GO:0016787 hydrolase activity; GO:0016788 hydrolase activity, acting on ester bonds; GO:0016791 phosphatase activity; GO:0042578 phosphoric ester hydrolase activity;	PF00149	Calcineurin-like phosphoesterase	S	KOG1432	Predicted DNA repair exonuclease SIA1
TRINITY_DN2114_c2_g1_m.5297	Probable inactive purple acid phosphatase 29 OS=Arabidopsis thaliana OX=3702 GN=PAP29 PE=2 SV=1	PAP29	1.6651	2.85015e-05	Up	25.576	30.5	4	4	0.650184	0.692029	0.692482	1.10652	1.1519	1.12959	1.19969	1.16963	1.20798	chloroplast				GO:0006793 phosphorus metabolic process; GO:0006796 phosphate-containing compound metabolic process; GO:0008152 metabolic process; GO:0009987 cellular process; GO:0016311 dephosphorylation; GO:0044237 cellular metabolic process;		GO:0003824 catalytic activity; GO:0003993 acid phosphatase activity; GO:0016787 hydrolase activity; GO:0016788 hydrolase activity, acting on ester bonds; GO:0016791 phosphatase activity; GO:0042578 phosphoric ester hydrolase activity;			S	KOG1432	Predicted DNA repair exonuclease SIA1
TRINITY_DN2129_c0_g1_m.5372	Protein TIC 55, chloroplastic OS=Pisum sativum OX=3888 GN=TIC55 PE=1 SV=1	TIC55	0.6454	0.00615194	Down	60.91	20	8	8	1.51549	1.58367	1.32988	0.966406	0.841901	1.05029	0.640449	0.457331	0.614577	chloroplast				GO:0006605 protein targeting; GO:0006810 transport; GO:0006886 intracellular protein transport; GO:0008104 protein localization; GO:0015031 protein transport; GO:0015833 peptide transport; GO:0033036 macromolecule localization; GO:0033365 protein localization to organelle; GO:0034613 cellular protein localization; GO:0042886 amide transport; GO:0045036 protein targeting to chloroplast; GO:0045184…	GO:0005622 intracellular; GO:0005623 cell; GO:0005737 cytoplasm; GO:0009507 chloroplast; GO:0009526 plastid envelope; GO:0009536 plastid; GO:0009941 chloroplast envelope; GO:0031967 organelle envelope; GO:0031975 envelope; GO:0043226 organelle; GO:0043227 membrane-bounded organelle; GO:0043229 intracellular organelle; GO:0043231 intracellular membrane-bounded organelle;		PF00355	Rieske [2Fe-2S] domain
TRINITY_DN2130_c1_g1_m.5376	Ubiquitin-conjugating enzyme E2 35 OS=Arabidopsis thaliana OX=3702 GN=UBC35 PE=1 SV=1	UBC35	0.5599	0.0319422	Down	17.22	58.8	9	2	0.896434	1.53488	1.45302	0.718266	0.721529	0.735221	1.02059	0.927022	0.993034	mitochondria	K10580	UBE2N, BLU, UBC13; ubiquitin-conjugating enzyme E2 N [EC:2.3.2.23]	map04120 Ubiquitin mediated proteolysis				PF00179	Ubiquitin-conjugating enzyme	O	KOG0417	Ubiquitin-protein ligase
TRINITY_DN2132_c1_g1_m.5390	CLIP-associated protein OS=Arabidopsis thaliana OX=3702 GN=CLASP PE=1 SV=1	CLASP	0.644	3.26676e-05	Down	160.29	27.1	27	27	1.4365	1.44099	1.45151	0.890554	0.950629	0.946893	0.614389	0.6623	0.606233	nucleus	K16578	CLASP1_2; CLIP-associating protein 1/2		GO:0000226 microtubule cytoskeleton organization; GO:0000278 mitotic cell cycle; GO:0000902 cell morphogenesis; GO:0006996 organelle organization; GO:0007010 cytoskeleton organization; GO:0007017 microtubule-based process; GO:0007020 microtubule nucleation; GO:0007026 negative regulation of microtubule depolymerization; GO:0007049 cell cycle; GO:0009653 anatomical structure morphogenesis; GO:0009…	GO:0005622 intracellular; GO:0005623 cell; GO:0005737 cytoplasm; GO:0005819 spindle; GO:0005856 cytoskeleton; GO:0005874 microtubule; GO:0005876 spindle microtubule; GO:0005886 plasma membrane; GO:0005911 cell-cell junction; GO:0005938 cell cortex; GO:0009506 plasmodesma; GO:0009524 phragmoplast; GO:0015630 microtubule cytoskeleton; GO:0016020 membrane; GO:0030054 cell junction; GO:0043226 organe…	GO:0005488 binding; GO:0005515 protein binding; GO:0008017 microtubule binding; GO:0008092 cytoskeletal protein binding; GO:0015631 tubulin binding; GO:0051010 microtubule plus-end binding;			S	KOG2956	CLIP-associating protein
TRINITY_DN2137_c0_g1_m.5412	Arogenate dehydratase/prephenate dehydratase 2, chloroplastic OS=Arabidopsis thaliana OX=3702 GN=ADT2 PE=1 SV=1	ADT2	0.5755	0.000304929	Down	45.466	22.3	7	6	1.51145	1.52449	1.45232	0.78708	0.913112	0.882765	0.689638	0.71869	0.520459	chloroplast	K05359	ADT, PDT; arogenate/prephenate dehydratase [EC:4.2.1.91 4.2.1.51]	map00400 Phenylalanine, tyrosine and tryptophan biosynthesis; map01100 Metabolic pathways; map01110 Biosynthesis of secondary metabolites; map01230 Biosynthesis of amino acids	GO:0006082 organic acid metabolic process; GO:0006520 cellular amino acid metabolic process; GO:0006558 L-phenylalanine metabolic process; GO:0006725 cellular aromatic compound metabolic process; GO:0006807 nitrogen compound metabolic process; GO:0008152 metabolic process; GO:0008652 cellular amino acid biosynthetic process; GO:0009058 biosynthetic process; GO:0009072 aromatic amino acid family m…	GO:0005622 intracellular; GO:0005623 cell; GO:0005737 cytoplasm; GO:0009507 chloroplast; GO:0009536 plastid; GO:0043226 organelle; GO:0043227 membrane-bounded organelle; GO:0043229 intracellular organelle; GO:0043231 intracellular membrane-bounded organelle;	GO:0003824 catalytic activity; GO:0004664 prephenate dehydratase activity; GO:0016829 lyase activity; GO:0016835 carbon-oxygen lyase activity; GO:0016836 hydro-lyase activity; GO:0047769 arogenate dehydratase activity;			E	KOG2797	Prephenate dehydratase
TRINITY_DN2152_c0_g1_m.5457	Myrcene synthase, chloroplastic OS=Quercus ilex OX=58334 PE=1 SV=1	--	0.3386	0.000484814	Down	43.614	25.5	8	6	2.02713	1.45193	1.55457	0.548981	0.574611	0.580861	0.726144	0.610265	0.925512	chloroplast	K07385	TPS-Cin; 1,8-cineole synthase [EC:4.2.3.108]	map00902 Monoterpenoid biosynthesis; map01100 Metabolic pathways; map01110 Biosynthesis of secondary metabolites	GO:0001101 response to acid chemical; GO:0006629 lipid metabolic process; GO:0006714 sesquiterpenoid metabolic process; GO:0006720 isoprenoid metabolic process; GO:0006721 terpenoid metabolic process; GO:0006950 response to stress; GO:0008152 metabolic process; GO:0008299 isoprenoid biosynthetic process; GO:0008610 lipid biosynthetic process; GO:0009058 biosynthetic process; GO:0009605 response t…	GO:0005622 intracellular; GO:0005623 cell; GO:0005737 cytoplasm; GO:0005829 cytosol; GO:0009507 chloroplast; GO:0009532 plastid stroma; GO:0009536 plastid; GO:0009570 chloroplast stroma; GO:0043226 organelle; GO:0043227 membrane-bounded organelle; GO:0043229 intracellular organelle; GO:0043231 intracellular membrane-bounded organelle;	GO:0003824 catalytic activity; GO:0009975 cyclase activity; GO:0010333 terpene synthase activity; GO:0010334 sesquiterpene synthase activity; GO:0016829 lyase activity; GO:0016835 carbon-oxygen lyase activity; GO:0016838 carbon-oxygen lyase activity, acting on phosphates; GO:0034002 (R)-limonene synthase activity; GO:0034768 (E)-beta-ocimene synthase activity; GO:0050550 pinene synthase activity;…	PF01397; PF03936	Terpene synthase, N-terminal domain; Terpene synthase family, metal binding domain
TRINITY_DN2157_c1_g2_m.5470	Probable LRR receptor-like serine/threonine-protein kinase At1g56140 OS=Arabidopsis thaliana OX=3702 GN=At1g56140 PE=2 SV=2	At1g56140	0.5909	0.000342942	Down	31.244	5.7	3	2	1.32181	1.33116	1.41512	0.806386		0.796081	0.644208	0.630805	1.05444	cytoplasm				GO:0006464 cellular protein modification process; GO:0006468 protein phosphorylation; GO:0006793 phosphorus metabolic process; GO:0006796 phosphate-containing compound metabolic process; GO:0006807 nitrogen compound metabolic process; GO:0008152 metabolic process; GO:0009987 cellular process; GO:0016310 phosphorylation; GO:0019538 protein metabolic process; GO:0036211 protein modification process…	GO:0005623 cell; GO:0005886 plasma membrane; GO:0016020 membrane; GO:0071944 cell periphery;	GO:0003824 catalytic activity; GO:0004672 protein kinase activity; GO:0004674 protein serine/threonine kinase activity; GO:0016301 kinase activity; GO:0016740 transferase activity; GO:0016772 transferase activity, transferring phosphorus-containing groups; GO:0016773 phosphotransferase activity, alcohol group as acceptor; GO:0140096 catalytic activity, acting on a protein;	PF11721; PF00069	Di-glucose binding within endoplasmic reticulum; Protein kinase domain
TRINITY_DN2164_c0_g1_m.5497	Receptor-like kinase TMK4 OS=Arabidopsis thaliana OX=3702 GN=TMK4 PE=1 SV=1	TMK4	0.4382	0.000497508	Down	103.76	10.7	7	7	1.64857	1.66853	2.0518	0.822973	0.730387	0.799235	0.344251	0.403872	0.530377	plasma membrane	K00924	E2.7.1.-; kinase [EC:2.7.1.-]		GO:0006464 cellular protein modification process; GO:0006468 protein phosphorylation; GO:0006793 phosphorus metabolic process; GO:0006796 phosphate-containing compound metabolic process; GO:0006807 nitrogen compound metabolic process; GO:0007154 cell communication; GO:0007165 signal transduction; GO:0007166 cell surface receptor signaling pathway; GO:0007167 enzyme linked receptor protein signali…	GO:0005576 extracellular region; GO:0005622 intracellular; GO:0005623 cell; GO:0005737 cytoplasm; GO:0005794 Golgi apparatus; GO:0005886 plasma membrane; GO:0005911 cell-cell junction; GO:0009506 plasmodesma; GO:0012505 endomembrane system; GO:0016020 membrane; GO:0030054 cell junction; GO:0043226 organelle; GO:0043227 membrane-bounded organelle; GO:0043229 intracellular organelle; GO:0043231 int…	GO:0003824 catalytic activity; GO:0004672 protein kinase activity; GO:0004674 protein serine/threonine kinase activity; GO:0004675 transmembrane receptor protein serine/threonine kinase activity; GO:0004888 transmembrane signaling receptor activity; GO:0016301 kinase activity; GO:0016740 transferase activity; GO:0016772 transferase activity, transferring phosphorus-containing groups; GO:0016773 p…	PF07714	Protein tyrosine kinase
TRINITY_DN2165_c0_g1_m.5501	Peptidyl-prolyl cis-trans isomerase CYP19-4 OS=Arabidopsis thaliana OX=3702 GN=CYP19-4 PE=1 SV=2	CYP19-4	1.6058	2.87172e-06	Up	22.013	59.3	9	6	0.706523	0.688072	0.697757	1.10148	1.1187	1.13967	1.23975	1.19123	1.11682	vacuolar membrane	K01802	E5.2.1.8; peptidylprolyl isomerase [EC:5.2.1.8]		GO:0000413 protein peptidyl-prolyl isomerization; GO:0006464 cellular protein modification process; GO:0006807 nitrogen compound metabolic process; GO:0008152 metabolic process; GO:0009987 cellular process; GO:0018193 peptidyl-amino acid modification; GO:0018208 peptidyl-proline modification; GO:0019538 protein metabolic process; GO:0036211 protein modification process; GO:0043170 macromolecule m…	GO:0005622 intracellular; GO:0005623 cell; GO:0005737 cytoplasm; GO:0005768 endosome; GO:0005770 late endosome; GO:0005771 multivesicular body; GO:0005783 endoplasmic reticulum; GO:0005794 Golgi apparatus; GO:0005795 Golgi stack; GO:0005829 cytosol; GO:0012505 endomembrane system; GO:0016020 membrane; GO:0031410 cytoplasmic vesicle; GO:0031982 vesicle; GO:0031984 organelle subcompartment; GO:0043…	GO:0003755 peptidyl-prolyl cis-trans isomerase activity; GO:0003824 catalytic activity; GO:0005488 binding; GO:0008144 drug binding; GO:0016018 cyclosporin A binding; GO:0016853 isomerase activity; GO:0016859 cis-trans isomerase activity; GO:0033218 amide binding; GO:0042277 peptide binding; GO:0140096 catalytic activity, acting on a protein;	PF00160	Cyclophilin type peptidyl-prolyl cis-trans isomerase/CLD	O	KOG0865	Cyclophilin type peptidyl-prolyl cis-trans isomerase
TRINITY_DN21651_c0_g1_m.5499	Tubulin-folding cofactor B OS=Arabidopsis thaliana OX=3702 GN=TFCB PE=1 SV=1	TFCB	0.6425	0.00064971	Down	30.213	50.7	10	10	1.42538	1.43062	1.44377	0.993484	0.921871	0.847257	0.6358	0.658271	0.643552	cytoplasm	K17262	TBCB, CKAP1, ALF1; tubulin-specific chaperone B		GO:0000003 reproduction; GO:0003006 developmental process involved in reproduction; GO:0007275 multicellular organism development; GO:0009790 embryo development; GO:0009791 post-embryonic development; GO:0009793 embryo development ending in seed dormancy; GO:0009987 cellular process; GO:0010154 fruit development; GO:0022414 reproductive process; GO:0032501 multicellular organismal process; GO:003…	GO:0005622 intracellular; GO:0005623 cell; GO:0005634 nucleus; GO:0005737 cytoplasm; GO:0005829 cytosol; GO:0009524 phragmoplast; GO:0043226 organelle; GO:0043227 membrane-bounded organelle; GO:0043229 intracellular organelle; GO:0043231 intracellular membrane-bounded organelle;		PF01302	CAP-Gly domain	O	KOG3206	Alpha-tubulin folding cofactor B
TRINITY_DN21659_c0_g1_m.5500	hypothetical protein L484_001979 [Morus notabilis]	--	0.2633	0.00202623	Down	87.763	11.1	7	7	1.41134	2.18712	2.57207	0.511794	0.53583	0.576774	0.306875	0.388251	0.50995	nucleus
TRINITY_DN2195_c1_g1_m.5581	Rhomboid-like protein 19 OS=Arabidopsis thaliana OX=3702 GN=RBL19 PE=2 SV=1	RBL19	0.6537	2.75418e-05	Down	33.904	18.6	3	3	1.32102	1.33425	1.32063	0.837684	0.896129	0.865258	0.751856	0.770207	0.902963	plasma membrane				GO:0006810 transport; GO:0006890 retrograde vesicle-mediated transport, Golgi to endoplasmic reticulum; GO:0016192 vesicle-mediated transport; GO:0048193 Golgi vesicle transport; GO:0051179 localization; GO:0051234 establishment of localization;	GO:0005622 intracellular; GO:0005623 cell; GO:0005737 cytoplasm; GO:0005794 Golgi apparatus; GO:0012505 endomembrane system; GO:0043226 organelle; GO:0043227 membrane-bounded organelle; GO:0043229 intracellular organelle; GO:0043231 intracellular membrane-bounded organelle;		PF08551	Eukaryotic integral membrane protein (DUF1751)	S	KOG2890	Predicted membrane protein
TRINITY_DN2204_c1_g3_m.5614	Protein phosphatase methylesterase 1 OS=Bos taurus OX=9913 GN=PPME1 PE=2 SV=3	PPME1	1.6173	0.000621906	Up	44.278	36.2	10	10	0.711335	0.752055	0.777985	1.11883	1.29243	1.21376	1.02112	1.09116	1.02132	chloroplast	K13617	PPME1; protein phosphatase methylesterase 1 [EC:3.1.1.89]		GO:0006464 cellular protein modification process; GO:0006482 protein demethylation; GO:0006807 nitrogen compound metabolic process; GO:0008152 metabolic process; GO:0008214 protein dealkylation; GO:0009987 cellular process; GO:0010921 regulation of phosphatase activity; GO:0019220 regulation of phosphate metabolic process; GO:0019222 regulation of metabolic process; GO:0019538 protein metabolic p…		GO:0003824 catalytic activity; GO:0005488 binding; GO:0005515 protein binding; GO:0016787 hydrolase activity; GO:0016788 hydrolase activity, acting on ester bonds; GO:0019208 phosphatase regulator activity; GO:0019888 protein phosphatase regulator activity; GO:0019899 enzyme binding; GO:0019902 phosphatase binding; GO:0019903 protein phosphatase binding; GO:0030234 enzyme regulator activity; GO:0…	PF12697	Alpha/beta hydrolase family	S	KOG2564	Predicted acetyltransferases and hydrolases with the alpha/beta hydrolase fold
TRINITY_DN2216_c0_g1_m.5653	Protein MODIFIER OF SNC1 1 OS=Arabidopsis thaliana OX=3702 GN=MOS1 PE=1 SV=2	MOS1	1.8951	0.000129313	Up	148.39	14.7	13	13	0.734112	0.777471	0.794113	1.55748	1.37149	1.44047	0.774995	0.783287	0.766588	nucleus
TRINITY_DN2219_c0_g1_m.5663	ABC transporter E family member 2 OS=Arabidopsis thaliana OX=3702 GN=ABCE2 PE=2 SV=1	ABCE2	1.5566	0.00721925	Up	28.684	32.3	5	5	0.778382	0.745419	0.683577	0.975969	1.25356	1.20637	1.17951	1.0429	1.1343	cytoplasm	K06174	ABCE1, Rli1; ATP-binding cassette, sub-family E, member 1		GO:0000054 ribosomal subunit export from nucleus; GO:0006403 RNA localization; GO:0006405 RNA export from nucleus; GO:0006412 translation; GO:0006413 translational initiation; GO:0006415 translational termination; GO:0006518 peptide metabolic process; GO:0006611 protein export from nucleus; GO:0006807 nitrogen compound metabolic process; GO:0006810 transport; GO:0006886 intracellular protein tran…		GO:0000166 nucleotide binding; GO:0005215 transporter activity; GO:0005488 binding; GO:0005506 iron ion binding; GO:0005524 ATP binding; GO:0008144 drug binding; GO:0017076 purine nucleotide binding; GO:0030554 adenyl nucleotide binding; GO:0032553 ribonucleotide binding; GO:0032555 purine ribonucleotide binding; GO:0032559 adenyl ribonucleotide binding; GO:0035639 purine ribonucleoside triphosph…	PF00005	ABC transporter	A	KOG0063	RNAse L inhibitor, ABC superfamily
TRINITY_DN2233_c0_g1_m.5708	Prohibitin-1, mitochondrial OS=Arabidopsis thaliana OX=3702 GN=PHB1 PE=1 SV=1	PHB1	0.6178	1.03699e-05	Down	31.632	65.6	17	17	1.19207	1.17698	1.18526	0.726137	0.756071	0.713613	1.07995	1.09638	1.07354	chloroplast	K17081	PHB2; prohibitin 2			GO:0005618 cell wall; GO:0005622 intracellular; GO:0005623 cell; GO:0005737 cytoplasm; GO:0005739 mitochondrion; GO:0005740 mitochondrial envelope; GO:0005743 mitochondrial inner membrane; GO:0005746 mitochondrial respirasome; GO:0005747 mitochondrial respiratory chain complex I; GO:0005773 vacuole; GO:0005774 vacuolar membrane; GO:0005911 cell-cell junction; GO:0009506 plasmodesma; GO:0009507 ch…				O	KOG3090	Prohibitin-like protein
TRINITY_DN2235_c0_g1_m.5712	Protein GPR107 OS=Rattus norvegicus OX=10116 GN=Gpr107 PE=1 SV=1	Gpr107	0.4952	0.00541873	Down	51.956	4.8	2	2	1.32027	1.65087	1.4298	0.772212	0.680543		0.554852		0.591455	chloroplast	K22985	GPR107; G protein-coupled receptor 107		GO:0006810 transport; GO:0006897 endocytosis; GO:0006898 receptor-mediated endocytosis; GO:0016192 vesicle-mediated transport; GO:0051179 localization; GO:0051234 establishment of localization; GO:0072583 clathrin-dependent endocytosis; GO:0098657 import into cell;	GO:0005622 intracellular; GO:0005623 cell; GO:0005634 nucleus; GO:0005654 nucleoplasm; GO:0005737 cytoplasm; GO:0005768 endosome; GO:0005769 early endosome; GO:0005794 Golgi apparatus; GO:0012505 endomembrane system; GO:0030135 coated vesicle; GO:0030136 clathrin-coated vesicle; GO:0031410 cytoplasmic vesicle; GO:0031974 membrane-enclosed lumen; GO:0031981 nuclear lumen; GO:0031982 vesicle; GO:00…	GO:0005488 binding; GO:0005515 protein binding; GO:0030276 clathrin binding; GO:0032050 clathrin heavy chain binding;			T	KOG2569	G protein-coupled seven transmembrane receptor
TRINITY_DN2236_c1_g1_m.5719	Microtubule-associated protein 70-1 OS=Arabidopsis thaliana OX=3702 GN=MAP70.1 PE=1 SV=1	MAP70.1	0.5746	7.46968e-05	Down	78.019	14.2	7	7	1.59811	1.76233	1.72273	0.997169	0.947499	0.976334	0.278495	0.365936	0.351398	nucleus,plasma membrane				GO:0003002 regionalization; GO:0006996 organelle organization; GO:0007010 cytoskeleton organization; GO:0007275 multicellular organism development; GO:0007389 pattern specification process; GO:0009832 plant-type cell wall biogenesis; GO:0009987 cellular process; GO:0010051 xylem and phloem pattern formation; GO:0016043 cellular component organization; GO:0032501 multicellular organismal process; …	GO:0005622 intracellular; GO:0005623 cell; GO:0005737 cytoplasm; GO:0005856 cytoskeleton; GO:0005874 microtubule; GO:0005881 cytoplasmic microtubule; GO:0005938 cell cortex; GO:0010005 cortical microtubule, transverse to long axis; GO:0015630 microtubule cytoskeleton; GO:0030863 cortical cytoskeleton; GO:0030981 cortical microtubule cytoskeleton; GO:0043226 organelle; GO:0043228 non-membrane-boun…	GO:0005488 binding; GO:0005515 protein binding; GO:0008017 microtubule binding; GO:0008092 cytoskeletal protein binding; GO:0015631 tubulin binding;
TRINITY_DN22477_c0_g1_m.5751	Periodic tryptophan protein 2 OS=Arabidopsis thaliana OX=3702 GN=PWP2 PE=1 SV=1	PWP2	0.6134	0.0015665	Down	100.05	5.7	3	3	1.27172	1.112	1.35159	0.805021	0.744503	0.741539	0.864252	1.15074	0.958636	chloroplast	K14558	PWP2, UTP1; periodic tryptophan protein 2	map03008 Ribosome biogenesis in eukaryotes	GO:0000028 ribosomal small subunit assembly; GO:0000462 maturation of SSU-rRNA from tricistronic rRNA transcript (SSU-rRNA, 5.8S rRNA, LSU-rRNA); GO:0006139 nucleobase-containing compound metabolic process; GO:0006364 rRNA processing; GO:0006396 RNA processing; GO:0006725 cellular aromatic compound metabolic process; GO:0006807 nitrogen compound metabolic process; GO:0006996 organelle organizatio…	GO:0000151 ubiquitin ligase complex; GO:0005622 intracellular; GO:0005623 cell; GO:0005634 nucleus; GO:0005730 nucleolus; GO:0030684 preribosome; GO:0030686 90S preribosome; GO:0031461 cullin-RING ubiquitin ligase complex; GO:0031974 membrane-enclosed lumen; GO:0031981 nuclear lumen; GO:0032040 small-subunit processome; GO:0032991 protein-containing complex; GO:0034388 Pwp2p-containing subcomplex…	GO:0003676 nucleic acid binding; GO:0003723 RNA binding; GO:0005488 binding; GO:0030515 snoRNA binding; GO:0097159 organic cyclic compound binding; GO:1901363 heterocyclic compound binding;			A	KOG0291	WD40-repeat-containing subunit of the 18S rRNA processing complex
TRINITY_DN225_c0_g2_m.5780	Ras-related protein RABA1f OS=Arabidopsis thaliana OX=3702 GN=RABA1F PE=2 SV=1	RABA1F	0.6142	0.0317812	Down	24.158	40.6	9	4	1.6044	1.58574	1.06104	0.880096	0.786092	0.9447	0.795911	0.647984	0.694039	cytoplasm	K07976	RAB; Rab family, other		GO:0009987 cellular process; GO:0010035 response to inorganic substance; GO:0010038 response to metal ion; GO:0042221 response to chemical; GO:0042546 cell wall biogenesis; GO:0044085 cellular component biogenesis; GO:0046686 response to cadmium ion; GO:0050896 response to stimulus; GO:0071554 cell wall organization or biogenesis; GO:0071840 cellular component organization or biogenesis;	GO:0005622 intracellular; GO:0005623 cell; GO:0005737 cytoplasm; GO:0005768 endosome; GO:0005829 cytosol; GO:0005886 plasma membrane; GO:0012505 endomembrane system; GO:0016020 membrane; GO:0031410 cytoplasmic vesicle; GO:0031982 vesicle; GO:0043226 organelle; GO:0043227 membrane-bounded organelle; GO:0043229 intracellular organelle; GO:0071944 cell periphery; GO:0097708 intracellular vesicle;		PF00071	Ras family	U	KOG0087	GTPase Rab11/YPT3, small G protein superfamily
TRINITY_DN225_c0_g4_m.5784	Ras-related protein RABA1c OS=Arabidopsis thaliana OX=3702 GN=RABA1C PE=1 SV=1	RABA1C	0.569	1.59477e-06	Down	24.012	55.8	11	6	1.38126	1.39767	1.4015	0.811144	0.788883	0.778783	0.862177	0.786856	0.791734	cytoplasm	K07904	RAB11A; Ras-related protein Rab-11A	map04144 Endocytosis	GO:0009987 cellular process; GO:0042546 cell wall biogenesis; GO:0044085 cellular component biogenesis; GO:0071554 cell wall organization or biogenesis; GO:0071840 cellular component organization or biogenesis;	GO:0000139 Golgi membrane; GO:0005622 intracellular; GO:0005623 cell; GO:0005634 nucleus; GO:0005737 cytoplasm; GO:0005768 endosome; GO:0005769 early endosome; GO:0005773 vacuole; GO:0005794 Golgi apparatus; GO:0005802 trans-Golgi network; GO:0005829 cytosol; GO:0005886 plasma membrane; GO:0005911 cell-cell junction; GO:0009506 plasmodesma; GO:0010008 endosome membrane; GO:0012505 endomembrane sy…		PF00071	Ras family	U	KOG0087	GTPase Rab11/YPT3, small G protein superfamily
TRINITY_DN2253_c0_g1_m.5764	Arginyl-tRNA--protein transferase 1 OS=Arabidopsis thaliana OX=3702 GN=ATE1 PE=2 SV=2	ATE1	1.5214	0.000704678	Up	73.759	12	5	5	0.77023	0.701991	0.693521	1.05188	1.081	1.16212	1.02988	1.23308	1.27629	nucleus	K00685	ATE1; arginyl-tRNA---protein transferase [EC:2.3.2.8]		GO:0001101 response to acid chemical; GO:0006464 cellular protein modification process; GO:0006508 proteolysis; GO:0006511 ubiquitin-dependent protein catabolic process; GO:0006807 nitrogen compound metabolic process; GO:0006950 response to stress; GO:0006952 defense response; GO:0007275 multicellular organism development; GO:0007568 aging; GO:0008152 metabolic process; GO:0009056 catabolic proce…	GO:0005622 intracellular; GO:0005623 cell; GO:0005737 cytoplasm;	GO:0003824 catalytic activity; GO:0004057 arginyltransferase activity; GO:0016740 transferase activity; GO:0016746 transferase activity, transferring acyl groups; GO:0016755 transferase activity, transferring amino-acyl groups; GO:0140096 catalytic activity, acting on a protein;			O	KOG1193	Arginyl-tRNA-protein transferase
TRINITY_DN2254_c0_g1_m.5768	PRA1 family protein B4 OS=Arabidopsis thaliana OX=3702 GN=PRA1B4 PE=1 SV=1	PRA1B4	0.3765	0.00173837	Down	30.588	3.9	1	1	1.35476	1.71157	1.58969	0.570683	0.597992		0.739614		0.435683	chloroplast	K20359	RABAC1, PRAF1; PRA1 family protein 1		GO:0006810 transport; GO:0016192 vesicle-mediated transport; GO:0051179 localization; GO:0051234 establishment of localization;	GO:0005622 intracellular; GO:0005623 cell; GO:0005737 cytoplasm; GO:0005768 endosome; GO:0005783 endoplasmic reticulum; GO:0005794 Golgi apparatus; GO:0005802 trans-Golgi network; GO:0005829 cytosol; GO:0012505 endomembrane system; GO:0031410 cytoplasmic vesicle; GO:0031982 vesicle; GO:0031984 organelle subcompartment; GO:0043226 organelle; GO:0043227 membrane-bounded organelle; GO:0043229 intrac…				U	KOG3142	Prenylated rab acceptor 1
TRINITY_DN2258_c0_g1_m.5777	uncharacterized protein LOC21399407 [Morus notabilis]	--	0.6018	0.00695045	Down	59.56	28.4	9	9	1.46834	1.41617	1.38823	0.69707	0.909628	0.964626	0.705495	0.688749	0.761695	chloroplast					GO:0005622 intracellular; GO:0005623 cell; GO:0005737 cytoplasm; GO:0009507 chloroplast; GO:0009536 plastid; GO:0043226 organelle; GO:0043227 membrane-bounded organelle; GO:0043229 intracellular organelle; GO:0043231 intracellular membrane-bounded organelle;		PF06414	Zeta toxin	O	KOG0356	Mitochondrial chaperonin, Cpn60/Hsp60p
TRINITY_DN226_c0_g1_m.5821	Bifunctional UDP-glucose 4-epimerase and UDP-xylose 4-epimerase 1 OS=Arabidopsis thaliana OX=3702 GN=UGE1 PE=1 SV=2	UGE1	0.5632	1.89001e-05	Down	41.246	34.9	10	10	1.36355	1.33009	1.34755	0.728644	0.757599	0.789606	0.870039	0.903649	0.90927	chloroplast	K01784	galE, GALE; UDP-glucose 4-epimerase [EC:5.1.3.2]	map00052 Galactose metabolism; map00520 Amino sugar and nucleotide sugar metabolism; map01100 Metabolic pathways	GO:0007275 multicellular organism development; GO:0009555 pollen development; GO:0032501 multicellular organismal process; GO:0032502 developmental process; GO:0048229 gametophyte development; GO:0048856 anatomical structure development;	GO:0005622 intracellular; GO:0005623 cell; GO:0005737 cytoplasm; GO:0005829 cytosol; GO:0005886 plasma membrane; GO:0016020 membrane; GO:0071944 cell periphery;	GO:0003824 catalytic activity; GO:0003978 UDP-glucose 4-epimerase activity; GO:0016853 isomerase activity; GO:0016854 racemase and epimerase activity; GO:0016857 racemase and epimerase activity, acting on carbohydrates and derivatives; GO:0050373 UDP-arabinose 4-epimerase activity;			Q	KOG1371	UDP-glucose 4-epimerase/UDP-sulfoquinovose synthase
TRINITY_DN2274_c0_g1_m.5828	Adenosine deaminase-like protein OS=Homo sapiens OX=9606 GN=ADAL PE=2 SV=2	ADAL	0.5338	0.000185557	Down	41.047	46.3	12	12	1.4676	1.44232	1.47953	0.714297	0.790317	0.838518	0.75371	0.727074	0.786633	cytoplasm	K01488	add, ADA; adenosine deaminase [EC:3.5.4.4]	map00230 Purine metabolism; map01100 Metabolic pathways	GO:0006139 nucleobase-containing compound metabolic process; GO:0006152 purine nucleoside catabolic process; GO:0006154 adenosine catabolic process; GO:0006725 cellular aromatic compound metabolic process; GO:0006807 nitrogen compound metabolic process; GO:0008152 metabolic process; GO:0009056 catabolic process; GO:0009058 biosynthetic process; GO:0009116 nucleoside metabolic process; GO:0009119 …	GO:0005622 intracellular; GO:0005623 cell; GO:0005737 cytoplasm; GO:0005829 cytosol;	GO:0003824 catalytic activity; GO:0004000 adenosine deaminase activity; GO:0016787 hydrolase activity; GO:0016810 hydrolase activity, acting on carbon-nitrogen (but not peptide) bonds; GO:0016814 hydrolase activity, acting on carbon-nitrogen (but not peptide) bonds, in cyclic amidines; GO:0019239 deaminase activity;	PF00962	Adenosine/AMP deaminase	F	KOG1097	Adenine deaminase/adenosine deaminase
TRINITY_DN228_c0_g2_m.5869	Caffeoyl-CoA O-methyltransferase 1 OS=Populus trichocarpa OX=3694 GN=CCOAOMT1 PE=2 SV=1	CCOAOMT1	0.5403	0.000181109	Down	19.112	36.3	4	4	1.35497	1.50759	1.35803	0.803509	0.72668	0.750385	0.944125	0.777968	0.776743	cytoplasm	K00588	E2.1.1.104; caffeoyl-CoA O-methyltransferase [EC:2.1.1.104]	map00940 Phenylpropanoid biosynthesis; map00941 Flavonoid biosynthesis; map00945 Stilbenoid, diarylheptanoid and gingerol biosynthesis; map01100 Metabolic pathways; map01110 Biosynthesis of secondary metabolites	GO:0006725 cellular aromatic compound metabolic process; GO:0008152 metabolic process; GO:0009058 biosynthetic process; GO:0009698 phenylpropanoid metabolic process; GO:0009699 phenylpropanoid biosynthetic process; GO:0009804 coumarin metabolic process; GO:0009805 coumarin biosynthetic process; GO:0009987 cellular process; GO:0010035 response to inorganic substance; GO:0010038 response to metal i…		GO:0003824 catalytic activity; GO:0008168 methyltransferase activity; GO:0008171 O-methyltransferase activity; GO:0008757 S-adenosylmethionine-dependent methyltransferase activity; GO:0016740 transferase activity; GO:0016741 transferase activity, transferring one-carbon groups; GO:0042409 caffeoyl-CoA O-methyltransferase activity;	PF01596	O-methyltransferase	Q	KOG1663	O-methyltransferase
TRINITY_DN2295_c0_g1_m.5890	Low-temperature-induced 65 kDa protein OS=Arabidopsis thaliana OX=3702 GN=LTI65 PE=2 SV=2	LTI65	8.995	0.000352836	Up	32.227	37.1	6	6	0.150603	0.123475	0.16844	1.4244	1.62992	0.926133	1.51608	1.54489	1.51605	nucleus	K23450	HRC; sarcoplasmic reticulum histidine-rich calcium-binding protein		GO:0000302 response to reactive oxygen species; GO:0001101 response to acid chemical; GO:0006950 response to stress; GO:0006970 response to osmotic stress; GO:0006972 hyperosmotic response; GO:0006979 response to oxidative stress; GO:0007154 cell communication; GO:0007165 signal transduction; GO:0007275 multicellular organism development; GO:0007568 aging; GO:0007623 circadian rhythm; GO:0009266 …	GO:0005622 intracellular; GO:0005623 cell; GO:0005737 cytoplasm;
TRINITY_DN23224_c2_g1_m.6014	Protein TORNADO 2 OS=Arabidopsis thaliana OX=3702 GN=TRN2 PE=1 SV=1	TRN2	0.2522	2.3056e-06	Down	33.652	5.7	2	2	1.65039	1.59568	1.63426	0.407256	0.413132			0.299282		plasma membrane				GO:0000003 reproduction; GO:0003002 regionalization; GO:0003006 developmental process involved in reproduction; GO:0007049 cell cycle; GO:0007275 multicellular organism development; GO:0007389 pattern specification process; GO:0009553 embryo sac development; GO:0009554 megasporogenesis; GO:0009653 anatomical structure morphogenesis; GO:0009888 tissue development; GO:0009933 meristem structural or…	GO:0005623 cell; GO:0005886 plasma membrane; GO:0005911 cell-cell junction; GO:0009506 plasmodesma; GO:0016020 membrane; GO:0030054 cell junction; GO:0055044 symplast; GO:0071944 cell periphery;
TRINITY_DN233_c2_g1_m.6085	Probable methyltransferase PMT2 OS=Arabidopsis thaliana OX=3702 GN=At1g26850 PE=2 SV=2	At1g26850	0.3963	2.66251e-07	Down	69.246	55.5	28	28	1.84075	1.8138	1.86335	0.733821	0.739654	0.713443	0.430142	0.419988	0.44506	cytoplasm				GO:0008152 metabolic process; GO:0032259 methylation;	GO:0005622 intracellular; GO:0005623 cell; GO:0005737 cytoplasm; GO:0005768 endosome; GO:0005794 Golgi apparatus; GO:0005802 trans-Golgi network; GO:0012505 endomembrane system; GO:0016020 membrane; GO:0031410 cytoplasmic vesicle; GO:0031982 vesicle; GO:0031984 organelle subcompartment; GO:0043226 organelle; GO:0043227 membrane-bounded organelle; GO:0043229 intracellular organelle; GO:0043231 int…	GO:0003824 catalytic activity; GO:0008168 methyltransferase activity; GO:0008757 S-adenosylmethionine-dependent methyltransferase activity; GO:0016740 transferase activity; GO:0016741 transferase activity, transferring one-carbon groups;
TRINITY_DN2331_c0_g1_m.6041	Protein DJ-1 homolog B OS=Arabidopsis thaliana OX=3702 GN=DJ1B PE=1 SV=1	DJ1B	1.7035	4.78802e-06	Up	46.77	49.4	26	26	0.675823	0.704148	0.689398	1.15279	1.19611	1.17636	1.09957	1.14274	1.16308	chloroplast	K03152	thiJ; protein deglycase [EC:3.5.1.124]		GO:0006081 cellular aldehyde metabolic process; GO:0006082 organic acid metabolic process; GO:0006089 lactate metabolic process; GO:0008152 metabolic process; GO:0009056 catabolic process; GO:0009058 biosynthetic process; GO:0009438 methylglyoxal metabolic process; GO:0009987 cellular process; GO:0010035 response to inorganic substance; GO:0010038 response to metal ion; GO:0016053 organic acid bi…	GO:0005622 intracellular; GO:0005623 cell; GO:0005634 nucleus; GO:0005737 cytoplasm; GO:0005773 vacuole; GO:0005774 vacuolar membrane; GO:0005829 cytosol; GO:0005886 plasma membrane; GO:0005911 cell-cell junction; GO:0009506 plasmodesma; GO:0009507 chloroplast; GO:0009532 plastid stroma; GO:0009536 plastid; GO:0009570 chloroplast stroma; GO:0016020 membrane; GO:0030054 cell junction; GO:0031090 o…	GO:0003824 catalytic activity; GO:0016829 lyase activity; GO:0016835 carbon-oxygen lyase activity; GO:0016836 hydro-lyase activity; GO:0019172 glyoxalase III activity;	PF01965	DJ-1/PfpI family	V	KOG2764	Putative transcriptional regulator DJ-1
TRINITY_DN2340_c0_g1_m.6089	LysM domain receptor-like kinase 3 OS=Arabidopsis thaliana OX=3702 GN=LYK3 PE=2 SV=1	LYK3	1.6869	0.00012102	Up	36.082	42.8	10	10	0.663279	0.632781	0.711957	1.11322	1.12661	1.14755	1.28057	1.13388	1.19015	cytoplasm					GO:0005622 intracellular; GO:0005623 cell; GO:0005634 nucleus; GO:0043226 organelle; GO:0043227 membrane-bounded organelle; GO:0043229 intracellular organelle; GO:0043231 intracellular membrane-bounded organelle;		PF02668	Taurine catabolism dioxygenase TauD, TfdA family
TRINITY_DN2360_c0_g3_m.6156	Somatic embryogenesis receptor kinase 2 OS=Arabidopsis thaliana OX=3702 GN=SERK2 PE=1 SV=1	SERK2	0.6195	7.03257e-05	Down	69.069	16.7	7	4	1.39658	1.31228	1.30534	0.803416	0.855005	0.828554	0.754832	0.90105	0.842943	plasma membrane	K13418	SERK1; somatic embryogenesis receptor kinase 1 [EC:2.7.10.1 2.7.11.1]		GO:0000003 reproduction; GO:0003006 developmental process involved in reproduction; GO:0006464 cellular protein modification process; GO:0006468 protein phosphorylation; GO:0006793 phosphorus metabolic process; GO:0006796 phosphate-containing compound metabolic process; GO:0006807 nitrogen compound metabolic process; GO:0006996 organelle organization; GO:0007030 Golgi organization; GO:0007049 cel…	GO:0005622 intracellular; GO:0005623 cell; GO:0005737 cytoplasm; GO:0005783 endoplasmic reticulum; GO:0005789 endoplasmic reticulum membrane; GO:0005886 plasma membrane; GO:0012505 endomembrane system; GO:0016020 membrane; GO:0031984 organelle subcompartment; GO:0042175 nuclear outer membrane-endoplasmic reticulum membrane network; GO:0043226 organelle; GO:0043227 membrane-bounded organelle; GO:0…	GO:0003824 catalytic activity; GO:0004672 protein kinase activity; GO:0004674 protein serine/threonine kinase activity; GO:0004675 transmembrane receptor protein serine/threonine kinase activity; GO:0004888 transmembrane signaling receptor activity; GO:0005102 signaling receptor binding; GO:0005488 binding; GO:0005515 protein binding; GO:0016301 kinase activity; GO:0016740 transferase activity; G…	PF00069	Protein kinase domain
TRINITY_DN2361_c0_g1_m.6163	Pyruvate kinase isozyme A, chloroplastic OS=Ricinus communis OX=3988 PE=1 SV=1	--	0.5602	3.10152e-05	Down	63.647	33.3	14	13	1.31472	1.44235	1.35223	0.767877	0.77229	0.76204	0.854818	0.868094	0.865575	chloroplast	K00873	PK, pyk; pyruvate kinase [EC:2.7.1.40]	map00010 Glycolysis / Gluconeogenesis; map00230 Purine metabolism; map00620 Pyruvate metabolism; map01100 Metabolic pathways; map01110 Biosynthesis of secondary metabolites; map01200 Carbon metabolism; map01230 Biosynthesis of amino acids		GO:0005622 intracellular; GO:0005623 cell; GO:0005737 cytoplasm; GO:0009507 chloroplast; GO:0009536 plastid; GO:0043226 organelle; GO:0043227 membrane-bounded organelle; GO:0043229 intracellular organelle; GO:0043231 intracellular membrane-bounded organelle;		PF02887	Pyruvate kinase, alpha/beta domain	G	KOG2323	Pyruvate kinase
TRINITY_DN2364_c0_g1_m.6175	GTPase LSG1-2 OS=Arabidopsis thaliana OX=3702 GN=LSG1-2 PE=1 SV=1	LSG1-2	1.8484	0.00135524	Up	67.593	18.8	9	9	0.678599	0.746571	0.681299	1.14173	1.4557	1.29617	0.968203	0.983686	1.04804	nucleus	K14539	LSG1; large subunit GTPase 1 [EC:3.6.1.-]	map03008 Ribosome biogenesis in eukaryotes	GO:0000003 reproduction; GO:0000054 ribosomal subunit export from nucleus; GO:0003006 developmental process involved in reproduction; GO:0006139 nucleobase-containing compound metabolic process; GO:0006364 rRNA processing; GO:0006396 RNA processing; GO:0006403 RNA localization; GO:0006405 RNA export from nucleus; GO:0006611 protein export from nucleus; GO:0006725 cellular aromatic compound metabo…	GO:0005622 intracellular; GO:0005623 cell; GO:0005634 nucleus; GO:0005654 nucleoplasm; GO:0005730 nucleolus; GO:0005737 cytoplasm; GO:0005783 endoplasmic reticulum; GO:0005829 cytosol; GO:0012505 endomembrane system; GO:0015030 Cajal body; GO:0016604 nuclear body; GO:0031974 membrane-enclosed lumen; GO:0031981 nuclear lumen; GO:0043226 organelle; GO:0043227 membrane-bounded organelle; GO:0043228 …	GO:0000166 nucleotide binding; GO:0001882 nucleoside binding; GO:0001883 purine nucleoside binding; GO:0003824 catalytic activity; GO:0003924 GTPase activity; GO:0005488 binding; GO:0005525 GTP binding; GO:0016462 pyrophosphatase activity; GO:0016787 hydrolase activity; GO:0016817 hydrolase activity, acting on acid anhydrides; GO:0016818 hydrolase activity, acting on acid anhydrides, in phosphoru…			S	KOG1424	Predicted GTP-binding protein MMR1
TRINITY_DN2364_c1_g1_m.6177	Probable protein phosphatase 2C 5 OS=Arabidopsis thaliana OX=3702 GN=At1g09160 PE=2 SV=1	At1g09160	0.5533	0.0456921	Down	45.708	14.6	4	4	0.946015	1.74439	1.61802	0.750452	0.823628	0.809823		0.626289	0.681374	chloroplast					GO:0005623 cell; GO:0005886 plasma membrane; GO:0016020 membrane; GO:0071944 cell periphery;				T	KOG0698	Serine/threonine protein phosphatase
TRINITY_DN2365_c0_g2_m.6183	Probable prolyl 4-hydroxylase 10 OS=Arabidopsis thaliana OX=3702 GN=P4H10 PE=3 SV=1	P4H10	0.6293	0.000231766	Down	32.629	27.5	7	7	1.38979	1.3442	1.32261	0.794111	0.877186	0.881326	0.91092	0.763175	0.716686	mitochondria	K00472	P4HA; prolyl 4-hydroxylase [EC:1.14.11.2]	map00330 Arginine and proline metabolism; map01100 Metabolic pathways	GO:0006082 organic acid metabolic process; GO:0006464 cellular protein modification process; GO:0006520 cellular amino acid metabolic process; GO:0006575 cellular modified amino acid metabolic process; GO:0006807 nitrogen compound metabolic process; GO:0007275 multicellular organism development; GO:0008152 metabolic process; GO:0009653 anatomical structure morphogenesis; GO:0009888 tissue develop…	GO:0005622 intracellular; GO:0005623 cell; GO:0005737 cytoplasm; GO:0005783 endoplasmic reticulum; GO:0012505 endomembrane system; GO:0043226 organelle; GO:0043227 membrane-bounded organelle; GO:0043229 intracellular organelle; GO:0043231 intracellular membrane-bounded organelle;	GO:0003824 catalytic activity; GO:0004656 procollagen-proline 4-dioxygenase activity; GO:0016491 oxidoreductase activity; GO:0016705 oxidoreductase activity, acting on paired donors, with incorporation or reduction of molecular oxygen; GO:0016706 2-oxoglutarate-dependent dioxygenase activity; GO:0019798 procollagen-proline dioxygenase activity; GO:0031543 peptidyl-proline dioxygenase activity; GO…	PF13640	2OG-Fe(II) oxygenase superfamily	E	KOG1591	Prolyl 4-hydroxylase alpha subunit
TRINITY_DN2366_c2_g1_m.6188	Granule-bound starch synthase 1, chloroplastic/amyloplastic OS=Manihot esculenta OX=3983 GN=WAXY PE=2 SV=1	WAXY	3.8896	2.43554e-08	Up	67.37	64	35	35	0.520675	0.520157	0.522187	1.98472	2.05798	2.03677	0.448196	0.452965	0.456344	chloroplast	K13679	WAXY; granule-bound starch synthase [EC:2.4.1.242]	map00500 Starch and sucrose metabolism; map01100 Metabolic pathways; map01110 Biosynthesis of secondary metabolites	GO:0000271 polysaccharide biosynthetic process; GO:0005975 carbohydrate metabolic process; GO:0005976 polysaccharide metabolic process; GO:0005982 starch metabolic process; GO:0006073 cellular glucan metabolic process; GO:0008152 metabolic process; GO:0009058 biosynthetic process; GO:0009059 macromolecule biosynthetic process; GO:0009250 glucan biosynthetic process; GO:0009987 cellular process; G…	GO:0005622 intracellular; GO:0005623 cell; GO:0005737 cytoplasm; GO:0009501 amyloplast; GO:0009507 chloroplast; GO:0009536 plastid; GO:0043226 organelle; GO:0043227 membrane-bounded organelle; GO:0043229 intracellular organelle; GO:0043231 intracellular membrane-bounded organelle;	GO:0000166 nucleotide binding; GO:0003824 catalytic activity; GO:0004373 glycogen (starch) synthase activity; GO:0005488 binding; GO:0008194 UDP-glycosyltransferase activity; GO:0009011 starch synthase activity; GO:0016740 transferase activity; GO:0016757 transferase activity, transferring glycosyl groups; GO:0016758 transferase activity, transferring hexosyl groups; GO:0017076 purine nucleotide …	PF08323	Starch synthase catalytic domain
TRINITY_DN2367_c0_g1_m.6192	Eukaryotic translation initiation factor 3 subunit K OS=Oryza sativa subsp. japonica OX=39947 GN=TIF3K1 PE=2 SV=1	TIF3K1	0.615	5.5841e-06	Down	27.297	32	6	6	1.1306	1.14302	1.10735	0.706197	0.677858	0.695198	1.12568	1.17067	1.24344	cytoplasm	K15028	EIF3K; translation initiation factor 3 subunit K			GO:0005622 intracellular; GO:0005623 cell; GO:0005737 cytoplasm; GO:0005852 eukaryotic translation initiation factor 3 complex; GO:0032991 protein-containing complex;				J	KOG3252	Uncharacterized conserved protein
TRINITY_DN2371_c0_g2_m.6202	Serine/threonine-protein kinase SRK2B OS=Arabidopsis thaliana OX=3702 GN=SRK2B PE=1 SV=1	SRK2B	1.5381	7.59459e-05	Up	41.034	37.9	12	6	0.739739	0.737054	0.770682	1.11473	1.14264	1.19936	1.10011	1.05115	1.14454	cytoskeleton	K14498	SNRK2; serine/threonine-protein kinase SRK2 [EC:2.7.11.1]	map04016 MAPK signaling pathway - plant; map04075 Plant hormone signal transduction	GO:0006464 cellular protein modification process; GO:0006468 protein phosphorylation; GO:0006793 phosphorus metabolic process; GO:0006796 phosphate-containing compound metabolic process; GO:0006807 nitrogen compound metabolic process; GO:0006950 response to stress; GO:0006952 defense response; GO:0006970 response to osmotic stress; GO:0007154 cell communication; GO:0007165 signal transduction; GO…	GO:0005622 intracellular; GO:0005623 cell; GO:0005634 nucleus; GO:0005737 cytoplasm; GO:0043226 organelle; GO:0043227 membrane-bounded organelle; GO:0043229 intracellular organelle; GO:0043231 intracellular membrane-bounded organelle;	GO:0003676 nucleic acid binding; GO:0003723 RNA binding; GO:0003729 mRNA binding; GO:0003824 catalytic activity; GO:0004672 protein kinase activity; GO:0004674 protein serine/threonine kinase activity; GO:0005488 binding; GO:0016301 kinase activity; GO:0016740 transferase activity; GO:0016772 transferase activity, transferring phosphorus-containing groups; GO:0016773 phosphotransferase activity, …	PF00069	Protein kinase domain	T	KOG0583	Serine/threonine protein kinase
TRINITY_DN238_c0_g1_m.6242	Probable glutathione S-transferase OS=Nicotiana tabacum OX=4097 PE=2 SV=1	--	1.6134	2.53259e-05	Up	25.279	35.2	10	9	0.602235	0.630323	0.622205	0.978944	0.981854	1.03165	1.38434	1.38245	1.386	cytoplasm	K00799	GST, gst; glutathione S-transferase [EC:2.5.1.18]	map00480 Glutathione metabolism; map01100 Metabolic pathways	GO:0006518 peptide metabolic process; GO:0006575 cellular modified amino acid metabolic process; GO:0006749 glutathione metabolic process; GO:0006790 sulfur compound metabolic process; GO:0006807 nitrogen compound metabolic process; GO:0008152 metabolic process; GO:0009056 catabolic process; GO:0009404 toxin metabolic process; GO:0009407 toxin catabolic process; GO:0009628 response to abiotic sti…	GO:0005622 intracellular; GO:0005623 cell; GO:0005737 cytoplasm;	GO:0003824 catalytic activity; GO:0004364 glutathione transferase activity; GO:0016740 transferase activity; GO:0016765 transferase activity, transferring alkyl or aryl (other than methyl) groups;	PF02798; PF13410	Glutathione S-transferase, N-terminal domain; Glutathione S-transferase, C-terminal domain	O	KOG0406	Glutathione S-transferase
TRINITY_DN238_c0_g2_m.6243	Probable glutathione S-transferase OS=Nicotiana tabacum OX=4097 PE=2 SV=1	--	1.5481	4.7316e-05	Up	22.68	40.8	10	7	0.669547	0.683355	0.71292	1.03637	1.08445	1.07732	1.25193	1.26135	1.22274	cytoplasm	K00799	GST, gst; glutathione S-transferase [EC:2.5.1.18]	map00480 Glutathione metabolism; map01100 Metabolic pathways	GO:0006518 peptide metabolic process; GO:0006575 cellular modified amino acid metabolic process; GO:0006749 glutathione metabolic process; GO:0006790 sulfur compound metabolic process; GO:0006807 nitrogen compound metabolic process; GO:0008152 metabolic process; GO:0009056 catabolic process; GO:0009404 toxin metabolic process; GO:0009407 toxin catabolic process; GO:0009628 response to abiotic sti…	GO:0005622 intracellular; GO:0005623 cell; GO:0005737 cytoplasm;	GO:0003824 catalytic activity; GO:0004364 glutathione transferase activity; GO:0016740 transferase activity; GO:0016765 transferase activity, transferring alkyl or aryl (other than methyl) groups;	PF02798; PF13410	Glutathione S-transferase, N-terminal domain; Glutathione S-transferase, C-terminal domain	O	KOG0406	Glutathione S-transferase
TRINITY_DN2382_c0_g1_m.6232	Protein trichome birefringence-like 39 OS=Arabidopsis thaliana OX=3702 GN=TBL39 PE=2 SV=1	TBL39	0.3172	0.00377875	Down	43.108	21.8	6	6	1.89809	1.9098	1.79905	0.570735	0.407051	0.80055	0.558911	0.490807	0.565008	cytoplasm				GO:0009987 cellular process; GO:0071554 cell wall organization or biogenesis;	GO:0005622 intracellular; GO:0005623 cell; GO:0005737 cytoplasm; GO:0005773 vacuole; GO:0005794 Golgi apparatus; GO:0005911 cell-cell junction; GO:0009506 plasmodesma; GO:0012505 endomembrane system; GO:0030054 cell junction; GO:0043226 organelle; GO:0043227 membrane-bounded organelle; GO:0043229 intracellular organelle; GO:0043231 intracellular membrane-bounded organelle; GO:0055044 symplast;	GO:0003824 catalytic activity; GO:0008374 O-acyltransferase activity; GO:0016407 acetyltransferase activity; GO:0016413 O-acetyltransferase activity; GO:0016740 transferase activity; GO:0016746 transferase activity, transferring acyl groups; GO:0016747 transferase activity, transferring acyl groups other than amino-acyl groups;	PF14416	PMR5 N terminal Domain
TRINITY_DN2394_c0_g1_m.6255	Ubiquitin carboxyl-terminal hydrolase 12 OS=Arabidopsis thaliana OX=3702 GN=UBP12 PE=1 SV=2	UBP12	0.6315	0.000110962	Down	42.063	16.8	6	6	1.38298	1.39029	1.35785	0.901655	0.819496	0.887502	0.822014	0.686601	0.751609	nucleus	K10523	SPOP; speckle-type POZ protein		GO:0001101 response to acid chemical; GO:0006508 proteolysis; GO:0006807 nitrogen compound metabolic process; GO:0007154 cell communication; GO:0007165 signal transduction; GO:0008152 metabolic process; GO:0009719 response to endogenous stimulus; GO:0009725 response to hormone; GO:0009753 response to jasmonic acid; GO:0009755 hormone-mediated signaling pathway; GO:0009867 jasmonic acid mediated s…	GO:0005622 intracellular; GO:0005623 cell; GO:0005634 nucleus; GO:0005737 cytoplasm; GO:0005829 cytosol; GO:0043226 organelle; GO:0043227 membrane-bounded organelle; GO:0043229 intracellular organelle; GO:0043231 intracellular membrane-bounded organelle;	GO:0003824 catalytic activity; GO:0004843 thiol-dependent ubiquitin-specific protease activity; GO:0008233 peptidase activity; GO:0008234 cysteine-type peptidase activity; GO:0016787 hydrolase activity; GO:0019783 ubiquitin-like protein-specific protease activity; GO:0036459 thiol-dependent ubiquitinyl hydrolase activity; GO:0070011 peptidase activity, acting on L-amino acid peptides; GO:0101005 …	PF00917	MATH domain	D	KOG1987	Speckle-type POZ protein SPOP and related proteins with TRAF, MATH and BTB/POZ domains
TRINITY_DN24_c0_g1_m.6584	18.5 kDa class I heat shock protein OS=Glycine max OX=3847 GN=HSP18.5-C PE=3 SV=1	HSP18.5-C	1.8229	4.88397e-05	Up	11.521	71.3	12	6	0.651427	0.711791	0.714046	1.24916	1.29179	1.24572	1.0071	1.05543	1.07353	cytoplasm	K13993	HSP20; HSP20 family protein	map04141 Protein processing in endoplasmic reticulum	GO:0000302 response to reactive oxygen species; GO:0006950 response to stress; GO:0006979 response to oxidative stress; GO:0009266 response to temperature stimulus; GO:0009408 response to heat; GO:0009628 response to abiotic stimulus; GO:0009636 response to toxic substance; GO:0010033 response to organic substance; GO:0010035 response to inorganic substance; GO:0010038 response to metal ion; GO:0…	GO:0005622 intracellular; GO:0005623 cell; GO:0005737 cytoplasm; GO:0009507 chloroplast; GO:0009536 plastid; GO:0043226 organelle; GO:0043227 membrane-bounded organelle; GO:0043229 intracellular organelle; GO:0043231 intracellular membrane-bounded organelle;				O	KOG0710	Molecular chaperone (small heat-shock protein Hsp26/Hsp42)
TRINITY_DN24_c0_g2_m.6585	17.5 kDa class I heat shock protein OS=Glycine max OX=3847 GN=HSP17.5-M PE=3 SV=1	HSP17.5-M	1.6934	7.18031e-05	Up	16.12	47.8	9	3	0.811258	0.738983	0.763992	1.30263	1.27408	1.34215	0.935915	0.896856	0.934141	mitochondria	K13993	HSP20; HSP20 family protein	map04141 Protein processing in endoplasmic reticulum		GO:0005622 intracellular; GO:0005623 cell; GO:0005737 cytoplasm;				O	KOG0710	Molecular chaperone (small heat-shock protein Hsp26/Hsp42)
TRINITY_DN2401_c2_g1_m.6288	Filament-like plant protein 4 OS=Arabidopsis thaliana OX=3702 GN=FPP4 PE=1 SV=1	FPP4	0.6474	0.00164744	Down	120.44	15.6	13	13	1.59218	1.4907	1.73107	1.1153	0.981292	1.01975	0.2601	0.351696	0.457895	nucleus				GO:0000226 microtubule cytoskeleton organization; GO:0000902 cell morphogenesis; GO:0000904 cell morphogenesis involved in differentiation; GO:0006996 organelle organization; GO:0007010 cytoskeleton organization; GO:0007017 microtubule-based process; GO:0009653 anatomical structure morphogenesis; GO:0009888 tissue development; GO:0009987 cellular process; GO:0010026 trichome differentiation; GO:0…	GO:0005623 cell; GO:0005886 plasma membrane; GO:0016020 membrane; GO:0071944 cell periphery;	GO:0005488 binding; GO:0005515 protein binding; GO:0008017 microtubule binding; GO:0008092 cytoskeletal protein binding; GO:0015631 tubulin binding;
TRINITY_DN2412_c0_g2_m.6323	Probable xyloglucan endotransglucosylase/hydrolase protein 23 OS=Arabidopsis thaliana OX=3702 GN=XTH23 PE=2 SV=1	XTH23	0.4459	0.00284722	Down	33.32	20.2	4	4	1.83472	1.90959	1.71384	0.931568	0.628693	0.873442	0.383333	0.336311	0.388496	extracellular	K14504	TCH4; xyloglucan:xyloglucosyl transferase TCH4 [EC:2.4.1.207]	map04075 Plant hormone signal transduction		GO:0005618 cell wall; GO:0005622 intracellular; GO:0005623 cell; GO:0005737 cytoplasm; GO:0005794 Golgi apparatus; GO:0012505 endomembrane system; GO:0030312 external encapsulating structure; GO:0043226 organelle; GO:0043227 membrane-bounded organelle; GO:0043229 intracellular organelle; GO:0043231 intracellular membrane-bounded organelle; GO:0071944 cell periphery;		PF00722	Glycosyl hydrolases family 16
TRINITY_DN2417_c0_g1_m.6336	Mitochondrial carnitine/acylcarnitine carrier-like protein OS=Arabidopsis thaliana OX=3702 GN=BOU PE=1 SV=1	BOU	0.6248	5.20034e-06	Down	30.577	43.1	9	9	1.14007	1.18313	1.15352	0.710701	0.730306	0.731352	1.08786	1.13428	1.12877	nucleus	K15109	SLC25A20_29, CACT, CACL, CRC1; solute carrier family 25 (mitochondrial carnitine/acylcarnitine transporter), member 20/29		GO:0003333 amino acid transmembrane transport; GO:0006810 transport; GO:0006811 ion transport; GO:0006812 cation transport; GO:0006820 anion transport; GO:0006839 mitochondrial transport; GO:0006855 drug transmembrane transport; GO:0006865 amino acid transport; GO:0015711 organic anion transport; GO:0015807 L-amino acid transport; GO:0015822 ornithine transport; GO:0015849 organic acid transport;…	GO:0005622 intracellular; GO:0005623 cell; GO:0005737 cytoplasm; GO:0005739 mitochondrion; GO:0005740 mitochondrial envelope; GO:0005743 mitochondrial inner membrane; GO:0009507 chloroplast; GO:0009536 plastid; GO:0016020 membrane; GO:0016021 integral component of membrane; GO:0019866 organelle inner membrane; GO:0031090 organelle membrane; GO:0031224 intrinsic component of membrane; GO:0031966 m…	GO:0000064 L-ornithine transmembrane transporter activity; GO:0005215 transporter activity; GO:0005342 organic acid transmembrane transporter activity; GO:0008324 cation transmembrane transporter activity; GO:0008509 anion transmembrane transporter activity; GO:0008514 organic anion transmembrane transporter activity; GO:0015075 ion transmembrane transporter activity; GO:0015171 amino acid transm…			C	KOG0758	Mitochondrial carnitine-acylcarnitine carrier protein
TRINITY_DN2435_c0_g1_m.6374	Probable alpha,alpha-trehalose-phosphate synthase [UDP-forming] 9 OS=Arabidopsis thaliana OX=3702 GN=TPS9 PE=2 SV=1	TPS9	0.6631	0.000680872	Down	96.543	20.8	12	9	0.9193	0.883922	0.94872		0.60095	0.615581	1.44071	1.3096	1.28122	cytoplasm	K16055	TPS; trehalose 6-phosphate synthase/phosphatase [EC:2.4.1.15 3.1.3.12]	map00500 Starch and sucrose metabolism; map01100 Metabolic pathways	GO:0005975 carbohydrate metabolic process; GO:0005984 disaccharide metabolic process; GO:0005991 trehalose metabolic process; GO:0005992 trehalose biosynthetic process; GO:0006793 phosphorus metabolic process; GO:0006796 phosphate-containing compound metabolic process; GO:0006950 response to stress; GO:0008152 metabolic process; GO:0009058 biosynthetic process; GO:0009311 oligosaccharide metaboli…	GO:0005622 intracellular; GO:0005623 cell; GO:0005737 cytoplasm;	GO:0003824 catalytic activity; GO:0003825 alpha,alpha-trehalose-phosphate synthase (UDP-forming) activity; GO:0004805 trehalose-phosphatase activity; GO:0008194 UDP-glycosyltransferase activity; GO:0016740 transferase activity; GO:0016757 transferase activity, transferring glycosyl groups; GO:0016758 transferase activity, transferring hexosyl groups; GO:0016787 hydrolase activity; GO:0016788 hydr…			G	KOG1050	Trehalose-6-phosphate synthase component TPS1 and related subunits
TRINITY_DN24384_c0_g1_m.6385	Cuticle collagen 12 OS=Caenorhabditis elegans OX=6239 GN=col-12 PE=3 SV=1	col-12	0.4094	0.00024313	Down	29.51	10.1	2	2	1.21063	1.35454	1.24301	0.587665	0.480751	0.490643	1.13747	1.14176	1.35353	chloroplast									W	KOG3544	Collagens (type IV and type XIII), and related proteins
TRINITY_DN2448_c0_g1_m.6429	Bifunctional dTDP-4-dehydrorhamnose 3,5-epimerase/dTDP-4-dehydrorhamnose reductase OS=Arabidopsis thaliana OX=3702 GN=NRS/ER PE=1 SV=1	NRS/ER	0.6229	4.35786e-05	Down	33.634	69.7	18	15	1.39719	1.39289	1.39553	0.912381	0.844643	0.850156	0.772526	0.708103	0.726582	nucleus	K12451	UER1; 3,5-epimerase/4-reductase [EC:5.1.3.- 1.1.1.-]	map00520 Amino sugar and nucleotide sugar metabolism; map01100 Metabolic pathways	GO:0006139 nucleobase-containing compound metabolic process; GO:0006725 cellular aromatic compound metabolic process; GO:0006793 phosphorus metabolic process; GO:0006807 nitrogen compound metabolic process; GO:0006810 transport; GO:0008152 metabolic process; GO:0009058 biosynthetic process; GO:0009225 nucleotide-sugar metabolic process; GO:0009226 nucleotide-sugar biosynthetic process; GO:0009812…	GO:0005622 intracellular; GO:0005623 cell; GO:0005737 cytoplasm; GO:0005829 cytosol; GO:0005911 cell-cell junction; GO:0009506 plasmodesma; GO:0030054 cell junction; GO:0055044 symplast;	GO:0003824 catalytic activity; GO:0010280 UDP-L-rhamnose synthase activity; GO:0016829 lyase activity; GO:0016835 carbon-oxygen lyase activity; GO:0016836 hydro-lyase activity; GO:0050377 UDP-glucose 4,6-dehydratase activity;	PF04321	RmlD substrate binding domain	G	KOG0747	Putative NAD+-dependent epimerases
TRINITY_DN2464_c0_g1_m.6484	Amino acid permease 2 OS=Arabidopsis thaliana OX=3702 GN=AAP2 PE=1 SV=1	AAP2	1.782	1.93498e-05	Up	53.369	56.7	19	18	0.659686	0.658565	0.703259	1.22832	1.18175	1.19222	1.15017	1.08195	1.14408	chloroplast	K19366	SPG20; spartin	map04144 Endocytosis
TRINITY_DN2479_c0_g1_m.6529	Protein disulfide isomerase-like 1-4 OS=Arabidopsis thaliana OX=3702 GN=PDIL1-4 PE=1 SV=1	PDIL1-4	1.6332	7.73831e-08	Up	64.98	47.2	22	22	0.744548	0.745313	0.74373	1.22756	1.20579	1.21466	1.05624	1.03197	1.0302	endoplasmic reticulum	K09580	PDIA1, P4HB; protein disulfide-isomerase A1 [EC:5.3.4.1]	map04141 Protein processing in endoplasmic reticulum	GO:0006457 protein folding; GO:0006950 response to stress; GO:0006979 response to oxidative stress; GO:0009987 cellular process; GO:0033554 cellular response to stress; GO:0034976 response to endoplasmic reticulum stress; GO:0050896 response to stimulus; GO:0051716 cellular response to stimulus;	GO:0005622 intracellular; GO:0005623 cell; GO:0005737 cytoplasm; GO:0005739 mitochondrion; GO:0005773 vacuole; GO:0005774 vacuolar membrane; GO:0005783 endoplasmic reticulum; GO:0009507 chloroplast; GO:0009536 plastid; GO:0012505 endomembrane system; GO:0016020 membrane; GO:0031090 organelle membrane; GO:0043226 organelle; GO:0043227 membrane-bounded organelle; GO:0043229 intracellular organelle;…	GO:0003756 protein disulfide isomerase activity; GO:0003824 catalytic activity; GO:0016853 isomerase activity; GO:0016860 intramolecular oxidoreductase activity; GO:0016864 intramolecular oxidoreductase activity, transposing S-S bonds; GO:0140096 catalytic activity, acting on a protein;	PF00085; PF13848	Thioredoxin; Thioredoxin-like domain	O	KOG0190	Protein disulfide isomerase (prolyl 4-hydroxylase beta subunit)
TRINITY_DN2486_c0_g1_m.6548	Coatomer subunit beta'-3 OS=Arabidopsis thaliana OX=3702 GN=At3g15980 PE=2 SV=1	At3g15980	0.5447	1.61784e-05	Down	34.274	43.1	8	7	1.36381	1.42213	1.42352	0.76901	0.735521	0.788253	0.813332	0.856442	0.827981	cytoskeleton	K17302	COPB2, SEC27; coatomer subunit beta'		GO:0006810 transport; GO:0006886 intracellular protein transport; GO:0006888 endoplasmic reticulum to Golgi vesicle-mediated transport; GO:0006890 retrograde vesicle-mediated transport, Golgi to endoplasmic reticulum; GO:0006891 intra-Golgi vesicle-mediated transport; GO:0008104 protein localization; GO:0015031 protein transport; GO:0015833 peptide transport; GO:0016192 vesicle-mediated transport…	GO:0005622 intracellular; GO:0005623 cell; GO:0005737 cytoplasm; GO:0005794 Golgi apparatus; GO:0005798 Golgi-associated vesicle; GO:0012505 endomembrane system; GO:0012506 vesicle membrane; GO:0016020 membrane; GO:0030117 membrane coat; GO:0030120 vesicle coat; GO:0030126 COPI vesicle coat; GO:0030135 coated vesicle; GO:0030137 COPI-coated vesicle; GO:0030659 cytoplasmic vesicle membrane; GO:003…				U	KOG0276	Vesicle coat complex COPI, beta' subunit
TRINITY_DN2489_c0_g1_m.6551	Vacuole membrane protein KMS1 OS=Arabidopsis thaliana OX=3702 GN=KMS1 PE=1 SV=1	KMS1	0.4736	0.0139271	Down	46.906	10.3	2	2	1.28415	1.73008	1.29039	0.738783	0.620285			0.608736	0.72758	mitochondria	K21248	VMP1; vacuole membrane protein 1							S	KOG1109	Vacuole membrane protein VMP1
TRINITY_DN2491_c0_g1_m.6559	hypothetical protein L484_013184 [Morus notabilis]	--	0.5055	1.45418e-05	Down	25.361	33.3	7	7	1.57369	1.5103	1.59916	0.822094	0.76846	0.776618	0.695187	0.623006	0.631493	chloroplast
TRINITY_DN2495_c0_g1_m.6567	Alpha-glucan water dikinase, chloroplastic OS=Citrus reticulata OX=85571 GN=R1 PE=2 SV=1	R1	1.9916	1.63999e-08	Up	163.14	51.5	79	78	0.628758	0.639476	0.633598	1.26344	1.26408	1.26013	1.09743	1.10759	1.10551	chloroplast	K08244	R1; alpha-glucan, water dikinase [EC:2.7.9.4]		GO:0000272 polysaccharide catabolic process; GO:0005975 carbohydrate metabolic process; GO:0005976 polysaccharide metabolic process; GO:0005982 starch metabolic process; GO:0005983 starch catabolic process; GO:0006073 cellular glucan metabolic process; GO:0006793 phosphorus metabolic process; GO:0006796 phosphate-containing compound metabolic process; GO:0006950 response to stress; GO:0008152 met…	GO:0005622 intracellular; GO:0005623 cell; GO:0005737 cytoplasm; GO:0005739 mitochondrion; GO:0009507 chloroplast; GO:0009526 plastid envelope; GO:0009532 plastid stroma; GO:0009536 plastid; GO:0009570 chloroplast stroma; GO:0009941 chloroplast envelope; GO:0031967 organelle envelope; GO:0031975 envelope; GO:0043226 organelle; GO:0043227 membrane-bounded organelle; GO:0043229 intracellular organe…	GO:0003824 catalytic activity; GO:0016301 kinase activity; GO:0016740 transferase activity; GO:0016772 transferase activity, transferring phosphorus-containing groups; GO:0016781 phosphotransferase activity, paired acceptors; GO:0050521 alpha-glucan, water dikinase activity;
TRINITY_DN2502_c1_g1_m.6598	Tryptophan synthase beta chain 2 OS=Aquifex aeolicus (strain VF5) OX=224324 GN=trpB2 PE=3 SV=1	trpB2	1.868	0.000108246	Up	56.91	51.3	18	18	0.494717	0.533855	0.474299	0.916907	0.977477	0.912904	1.51404	1.58343	1.59237	chloroplast	K06001	trpB; tryptophan synthase beta chain [EC:4.2.1.20]	map00260 Glycine, serine and threonine metabolism; map00400 Phenylalanine, tyrosine and tryptophan biosynthesis; map01100 Metabolic pathways; map01110 Biosynthesis of secondary metabolites; map01230 Biosynthesis of amino acids						E	KOG1395	Tryptophan synthase beta chain
TRINITY_DN25056_c0_g1_m.6605	Small heat shock protein OV25-1 OS=Onchocerca volvulus OX=6282 GN=OV25-1 PE=2 SV=1	OV25-1	0.5638	0.000928935	Down	20.962	51.7	7	7	1.06549	1.05892	1.24971	0.671703	0.637407	0.593209	1.20042	1.32349	1.19966	mitochondria				GO:0006950 response to stress; GO:0007275 multicellular organism development; GO:0007568 aging; GO:0008340 determination of adult lifespan; GO:0009266 response to temperature stimulus; GO:0009408 response to heat; GO:0009628 response to abiotic stimulus; GO:0009790 embryo development; GO:0009792 embryo development ending in birth or egg hatching; GO:0010259 multicellular organism aging; GO:003250…	GO:0005622 intracellular; GO:0005623 cell; GO:0005737 cytoplasm; GO:0005829 cytosol;	GO:0005488 binding; GO:0005515 protein binding; GO:0051082 unfolded protein binding;			O	KOG3591	Alpha crystallins
TRINITY_DN2513_c0_g1_m.6645	DNA-directed RNA polymerase II subunit RPB2 OS=Solanum lycopersicum OX=4081 GN=RPB2 PE=2 SV=1	RPB2	1.7045	0.00163907	Up	68.008	14.9	8	8	0.715966	0.861491	0.895186	1.39774	1.45024	1.36676	0.784288	0.717185	0.811148	nucleus	K03010	RPB2, POLR2B; DNA-directed RNA polymerase II subunit RPB2 [EC:2.7.7.6]	map03020 RNA polymerase	GO:0006139 nucleobase-containing compound metabolic process; GO:0006396 RNA processing; GO:0006725 cellular aromatic compound metabolic process; GO:0006807 nitrogen compound metabolic process; GO:0008152 metabolic process; GO:0009058 biosynthetic process; GO:0009059 macromolecule biosynthetic process; GO:0009892 negative regulation of metabolic process; GO:0009987 cellular process; GO:0010033 res…	GO:0000428 DNA-directed RNA polymerase complex; GO:0005622 intracellular; GO:0005623 cell; GO:0005634 nucleus; GO:0005654 nucleoplasm; GO:0005665 RNA polymerase II, core complex; GO:0005737 cytoplasm; GO:0005829 cytosol; GO:0005911 cell-cell junction; GO:0009506 plasmodesma; GO:0016591 RNA polymerase II, holoenzyme; GO:0030054 cell junction; GO:0030880 RNA polymerase complex; GO:0031974 membrane-…	GO:0003824 catalytic activity; GO:0003899 DNA-directed 5'-3' RNA polymerase activity; GO:0016740 transferase activity; GO:0016772 transferase activity, transferring phosphorus-containing groups; GO:0016779 nucleotidyltransferase activity; GO:0034062 5'-3' RNA polymerase activity; GO:0097747 RNA polymerase activity; GO:0140098 catalytic activity, acting on RNA;	PF04561; PF04565; PF04566	RNA polymerase Rpb2, domain 2; RNA polymerase Rpb2, domain 3; RNA polymerase Rpb2, domain 4	K	KOG0214	RNA polymerase II, second largest subunit
TRINITY_DN2513_c0_g1_m.6646	DNA-directed RNA polymerase II subunit RPB2 OS=Solanum lycopersicum OX=4081 GN=RPB2 PE=2 SV=1	RPB2	3.2338	0.00478532	Up	58.126	10.7	4	4	0.360855	0.701016	0.434531	1.53293	1.87011	1.43595	0.73961	0.939513	0.985479	nucleus	K03010	RPB2, POLR2B; DNA-directed RNA polymerase II subunit RPB2 [EC:2.7.7.6]	map03020 RNA polymerase	GO:0006139 nucleobase-containing compound metabolic process; GO:0006396 RNA processing; GO:0006725 cellular aromatic compound metabolic process; GO:0006807 nitrogen compound metabolic process; GO:0008152 metabolic process; GO:0009058 biosynthetic process; GO:0009059 macromolecule biosynthetic process; GO:0009892 negative regulation of metabolic process; GO:0009987 cellular process; GO:0010033 res…	GO:0000428 DNA-directed RNA polymerase complex; GO:0005622 intracellular; GO:0005623 cell; GO:0005634 nucleus; GO:0005654 nucleoplasm; GO:0005665 RNA polymerase II, core complex; GO:0005737 cytoplasm; GO:0005829 cytosol; GO:0005911 cell-cell junction; GO:0009506 plasmodesma; GO:0016591 RNA polymerase II, holoenzyme; GO:0030054 cell junction; GO:0030880 RNA polymerase complex; GO:0031974 membrane-…	GO:0003824 catalytic activity; GO:0003899 DNA-directed 5'-3' RNA polymerase activity; GO:0016740 transferase activity; GO:0016772 transferase activity, transferring phosphorus-containing groups; GO:0016779 nucleotidyltransferase activity; GO:0034062 5'-3' RNA polymerase activity; GO:0097747 RNA polymerase activity; GO:0140098 catalytic activity, acting on RNA;	PF04567; PF00562; PF04560	RNA polymerase Rpb2, domain 5; RNA polymerase Rpb2, domain 6; RNA polymerase Rpb2, domain 7	K	KOG0214	RNA polymerase II, second largest subunit
TRINITY_DN2527_c0_g2_m.6687	Programmed cell death protein 5 OS=Pongo abelii OX=9601 GN=PDCD5 PE=2 SV=3	PDCD5	1.628	0.000215225	Up	13.153	63.5	6	6	0.737524	0.78829	0.759159	1.31685	1.22602	1.17705	1.04915	0.949375	0.996589	cytoplasm	K06875	PDCD5, TFAR19; programmed cell death protein 5		GO:0006915 apoptotic process; GO:0008219 cell death; GO:0008285 negative regulation of cell population proliferation; GO:0009719 response to endogenous stimulus; GO:0009893 positive regulation of metabolic process; GO:0009966 regulation of signal transduction; GO:0009967 positive regulation of signal transduction; GO:0009987 cellular process; GO:0010033 response to organic substance; GO:0010468 r…	GO:0005622 intracellular; GO:0005623 cell; GO:0005634 nucleus; GO:0005737 cytoplasm; GO:0005829 cytosol; GO:0043226 organelle; GO:0043227 membrane-bounded organelle; GO:0043229 intracellular organelle; GO:0043231 intracellular membrane-bounded organelle;	GO:0005488 binding; GO:0005515 protein binding; GO:0005539 glycosaminoglycan binding; GO:0008047 enzyme activator activity; GO:0008092 cytoskeletal protein binding; GO:0008201 heparin binding; GO:0010698 acetyltransferase activator activity; GO:0015631 tubulin binding; GO:0030234 enzyme regulator activity; GO:0043167 ion binding; GO:0043168 anion binding; GO:0048487 beta-tubulin binding; GO:00973…			S	KOG3431	Apoptosis-related protein/predicted DNA-binding protein
TRINITY_DN2536_c0_g1_m.6713	Eukaryotic peptide chain release factor subunit 1-3 OS=Arabidopsis thaliana OX=3702 GN=ERF1-3 PE=1 SV=1	ERF1-3	1.5965	6.69813e-05	Up	49.125	38	16	9	0.711252	0.763536	0.748581	1.22042	1.1505	1.17862	1.08649	1.07535	1.06526	cytoplasm	K03265	ETF1, ERF1; peptide chain release factor subunit 1	map03015 mRNA surveillance pathway	GO:0006412 translation; GO:0006415 translational termination; GO:0006518 peptide metabolic process; GO:0006807 nitrogen compound metabolic process; GO:0008152 metabolic process; GO:0009058 biosynthetic process; GO:0009059 macromolecule biosynthetic process; GO:0009987 cellular process; GO:0010467 gene expression; GO:0016043 cellular component organization; GO:0019538 protein metabolic process; GO…	GO:0005622 intracellular; GO:0005623 cell; GO:0005737 cytoplasm;	GO:0003676 nucleic acid binding; GO:0003723 RNA binding; GO:0003747 translation release factor activity; GO:0005488 binding; GO:0008079 translation termination factor activity; GO:0008135 translation factor activity, RNA binding; GO:0097159 organic cyclic compound binding; GO:1901363 heterocyclic compound binding;	PF03463; PF03464; PF03465	eRF1 domain 1; eRF1 domain 2; eRF1 domain 3	J	KOG0688	Peptide chain release factor 1 (eRF1)
TRINITY_DN254_c0_g1_m.6745	Tubulin alpha chain OS=Prunus dulcis OX=3755 GN=TUBA PE=2 SV=1	TUBA	0.644	4.22545e-07	Down	49.685	67.6	24	6	1.38785	1.40179	1.39341	0.893398	0.890932	0.909753	0.713277	0.705251	0.704347	cytoplasm	K07374	TUBA; tubulin alpha	map04145 Phagosome	GO:0000226 microtubule cytoskeleton organization; GO:0006950 response to stress; GO:0006970 response to osmotic stress; GO:0006996 organelle organization; GO:0007010 cytoskeleton organization; GO:0007017 microtubule-based process; GO:0009628 response to abiotic stimulus; GO:0009629 response to gravity; GO:0009651 response to salt stress; GO:0009987 cellular process; GO:0016043 cellular component …	GO:0005618 cell wall; GO:0005622 intracellular; GO:0005623 cell; GO:0005634 nucleus; GO:0005730 nucleolus; GO:0005737 cytoplasm; GO:0005773 vacuole; GO:0005829 cytosol; GO:0005856 cytoskeleton; GO:0005874 microtubule; GO:0005886 plasma membrane; GO:0005911 cell-cell junction; GO:0009506 plasmodesma; GO:0015630 microtubule cytoskeleton; GO:0016020 membrane; GO:0030054 cell junction; GO:0030312 ext…	GO:0005198 structural molecule activity; GO:0005200 structural constituent of cytoskeleton;	PF00091; PF03953	Tubulin/FtsZ family, GTPase domain; Tubulin C-terminal domain	Z	KOG1376	Alpha tubulin
TRINITY_DN2544_c0_g1_m.6731	uncharacterized protein LOC21402965 [Morus notabilis]	--	4.4421	1.43214e-05	Up	20.028	93.7	10	10	0.34797	0.308978	0.374149	1.52376	1.47851	1.57795	1.15629	1.13685	1.09554	nucleus
TRINITY_DN257_c0_g1_m.6811	Cytochrome P450 CYP72A219 OS=Panax ginseng OX=4054 PE=2 SV=1	--	5.4779	0.000112008	Up	63.077	27.5	15	15	0.126411	0.167821	0.162367	0.732973	0.838925	0.929293	2.02189	1.95297	2.06736	chloroplast				GO:0006629 lipid metabolic process; GO:0008152 metabolic process; GO:0008202 steroid metabolic process; GO:0009719 response to endogenous stimulus; GO:0009725 response to hormone; GO:0009741 response to brassinosteroid; GO:0010033 response to organic substance; GO:0010268 brassinosteroid homeostasis; GO:0010817 regulation of hormone levels; GO:0014070 response to organic cyclic compound; GO:00161…		GO:0003824 catalytic activity; GO:0004497 monooxygenase activity; GO:0008395 steroid hydroxylase activity; GO:0016491 oxidoreductase activity;	PF00067	Cytochrome P450	Q	KOG0157	Cytochrome P450 CYP4/CYP19/CYP26 subfamilies
TRINITY_DN2604_c2_g1_m.6883	Dynamin-related protein 1C OS=Arabidopsis thaliana OX=3702 GN=DRP1C PE=1 SV=2	DRP1C	0.5239	1.87503e-05	Down	68.371	47.4	21	14	1.51778	1.64447	1.53409	0.820953	0.804827	0.834615	0.641411	0.607364	0.594492	chloroplast				GO:0000266 mitochondrial fission; GO:0006996 organelle organization; GO:0007005 mitochondrion organization; GO:0007275 multicellular organism development; GO:0009555 pollen development; GO:0009987 cellular process; GO:0010152 pollen maturation; GO:0016043 cellular component organization; GO:0021700 developmental maturation; GO:0032501 multicellular organismal process; GO:0032502 developmental pro…	GO:0005622 intracellular; GO:0005623 cell; GO:0005737 cytoplasm; GO:0005886 plasma membrane; GO:0005911 cell-cell junction; GO:0005938 cell cortex; GO:0009504 cell plate; GO:0009506 plasmodesma; GO:0016020 membrane; GO:0030054 cell junction; GO:0055044 symplast; GO:0071944 cell periphery; GO:0099568 cytoplasmic region;	GO:0003824 catalytic activity; GO:0003924 GTPase activity; GO:0005488 binding; GO:0005515 protein binding; GO:0008017 microtubule binding; GO:0008092 cytoskeletal protein binding; GO:0015631 tubulin binding; GO:0016462 pyrophosphatase activity; GO:0016787 hydrolase activity; GO:0016817 hydrolase activity, acting on acid anhydrides; GO:0016818 hydrolase activity, acting on acid anhydrides, in phos…	PF00350	Dynamin family	U	KOG0446	Vacuolar sorting protein VPS1, dynamin, and related proteins
TRINITY_DN26119_c0_g2_m.6904	Probable sucrose-phosphate synthase 4 OS=Arabidopsis thaliana OX=3702 GN=SPS4 PE=1 SV=1	SPS4	0.5189	0.000950873	Down	120	12.6	10	8	1.67611	1.41914	1.73428	0.847764	0.888467	0.769739	0.597578	0.470727	0.596189	cytoplasm	K00696	E2.4.1.14; sucrose-phosphate synthase [EC:2.4.1.14]	map00500 Starch and sucrose metabolism; map01100 Metabolic pathways		GO:0005623 cell; GO:0005886 plasma membrane; GO:0016020 membrane; GO:0071944 cell periphery;	GO:0003824 catalytic activity; GO:0008194 UDP-glycosyltransferase activity; GO:0016740 transferase activity; GO:0016757 transferase activity, transferring glycosyl groups; GO:0016758 transferase activity, transferring hexosyl groups; GO:0035251 UDP-glucosyltransferase activity; GO:0046524 sucrose-phosphate synthase activity; GO:0046527 glucosyltransferase activity;	PF13579	Glycosyl transferase 4-like domain	M	KOG0853	Glycosyltransferase
TRINITY_DN2614_c0_g2_m.6918	Homeobox protein HD1 OS=Brassica napus OX=3708 GN=HD1 PE=2 SV=1	HD1	0.6034	0.00961758	Down	33.27	20.9	3	3	1.41893	1.38813	1.47912	0.766593		0.957502	0.594102	0.705445	0.690189	nucleus				GO:0006355 regulation of transcription, DNA-templated; GO:0008152 metabolic process; GO:0009058 biosynthetic process; GO:0009888 tissue development; GO:0009889 regulation of biosynthetic process; GO:0009890 negative regulation of biosynthetic process; GO:0009892 negative regulation of metabolic process; GO:0009987 cellular process; GO:0010087 phloem or xylem histogenesis; GO:0010089 xylem develop…	GO:0005622 intracellular; GO:0005623 cell; GO:0005634 nucleus; GO:0043226 organelle; GO:0043227 membrane-bounded organelle; GO:0043229 intracellular organelle; GO:0043231 intracellular membrane-bounded organelle;	GO:0003700 DNA-binding transcription factor activity; GO:0140110 transcription regulator activity;			K	KOG0773	Transcription factor MEIS1 and related HOX domain proteins
TRINITY_DN2628_c0_g2_m.6957	Putative potassium transporter 12 OS=Arabidopsis thaliana OX=3702 GN=POT12 PE=1 SV=2	POT12	0.2651	0.0101859	Down	93.408	5.7	3	3	0.997734	2.01042	2.30035	0.386608	0.467125	0.553571		0.680577	0.60361	plasma membrane	K03549	kup; KUP system potassium uptake protein		GO:0006810 transport; GO:0006811 ion transport; GO:0006812 cation transport; GO:0006813 potassium ion transport; GO:0009987 cellular process; GO:0015672 monovalent inorganic cation transport; GO:0030001 metal ion transport; GO:0034220 ion transmembrane transport; GO:0051179 localization; GO:0051234 establishment of localization; GO:0055085 transmembrane transport; GO:0071805 potassium ion transme…	GO:0005622 intracellular; GO:0005623 cell; GO:0005737 cytoplasm; GO:0009507 chloroplast; GO:0009536 plastid; GO:0016020 membrane; GO:0043226 organelle; GO:0043227 membrane-bounded organelle; GO:0043229 intracellular organelle; GO:0043231 intracellular membrane-bounded organelle;	GO:0005215 transporter activity; GO:0008324 cation transmembrane transporter activity; GO:0015075 ion transmembrane transporter activity; GO:0015077 monovalent inorganic cation transmembrane transporter activity; GO:0015079 potassium ion transmembrane transporter activity; GO:0015318 inorganic molecular entity transmembrane transporter activity; GO:0022857 transmembrane transporter activity; GO:0…
TRINITY_DN263_c0_g4_m.7010	Polyphenol oxidase, chloroplastic OS=Malus domestica OX=3750 PE=2 SV=1	--	0.6626	6.42574e-06	Down	65.271	48.1	27	26	1.23337	1.26059	1.26721	0.813874	0.841662	0.836747	0.903257	0.928269	0.915028	chloroplast	K00422	E1.10.3.1; polyphenol oxidase [EC:1.10.3.1]	map00350 Tyrosine metabolism; map00950 Isoquinoline alkaloid biosynthesis; map01100 Metabolic pathways; map01110 Biosynthesis of secondary metabolites				PF00264; PF12142; PF12143	Common central domain of tyrosinase; Polyphenol oxidase middle domain; Protein of unknown function (DUF_B2219)
TRINITY_DN264_c0_g1_m.7034	L-ascorbate peroxidase 2, cytosolic OS=Arabidopsis thaliana OX=3702 GN=APX2 PE=2 SV=3	APX2	2.3173	3.43057e-07	Up	27.517	60.4	14	11	0.58311	0.595428	0.605174	1.36912	1.39792	1.36627	1.03282	1.01041	1.03975	cytoplasm	K00434	E1.11.1.11; L-ascorbate peroxidase [EC:1.11.1.11]	map00053 Ascorbate and aldarate metabolism; map00480 Glutathione metabolism; map01100 Metabolic pathways	GO:0000302 response to reactive oxygen species; GO:0006950 response to stress; GO:0006979 response to oxidative stress; GO:0008152 metabolic process; GO:0009056 catabolic process; GO:0009636 response to toxic substance; GO:0009987 cellular process; GO:0016999 antibiotic metabolic process; GO:0017001 antibiotic catabolic process; GO:0017144 drug metabolic process; GO:0033554 cellular response to s…	GO:0005622 intracellular; GO:0005623 cell; GO:0005737 cytoplasm; GO:0005829 cytosol; GO:0009507 chloroplast; GO:0009536 plastid; GO:0043226 organelle; GO:0043227 membrane-bounded organelle; GO:0043229 intracellular organelle; GO:0043231 intracellular membrane-bounded organelle;	GO:0003824 catalytic activity; GO:0004130 cytochrome-c peroxidase activity; GO:0004601 peroxidase activity; GO:0016209 antioxidant activity; GO:0016491 oxidoreductase activity; GO:0016684 oxidoreductase activity, acting on peroxide as acceptor; GO:0016688 L-ascorbate peroxidase activity;	PF00141	Peroxidase
TRINITY_DN2644_c0_g1_m.7025	Protein trichome birefringence-like 38 OS=Arabidopsis thaliana OX=3702 GN=TBL38 PE=2 SV=1	TBL38	0.5921	8.71016e-05	Down	41.551	11.3	3	3	1.43956	1.48795	1.46996	0.901552	0.886876	0.815295	0.545544	0.736047	0.717215	chloroplast				GO:0009987 cellular process; GO:0071554 cell wall organization or biogenesis;	GO:0005622 intracellular; GO:0005623 cell; GO:0005737 cytoplasm; GO:0005794 Golgi apparatus; GO:0012505 endomembrane system; GO:0043226 organelle; GO:0043227 membrane-bounded organelle; GO:0043229 intracellular organelle; GO:0043231 intracellular membrane-bounded organelle;	GO:0003824 catalytic activity; GO:0008374 O-acyltransferase activity; GO:0016407 acetyltransferase activity; GO:0016413 O-acetyltransferase activity; GO:0016740 transferase activity; GO:0016746 transferase activity, transferring acyl groups; GO:0016747 transferase activity, transferring acyl groups other than amino-acyl groups;	PF14416	PMR5 N terminal Domain
TRINITY_DN2648_c0_g2_m.7031	Tubulin alpha-1 chain OS=Drosophila melanogaster OX=7227 GN=alphaTub84B PE=1 SV=1	alphaTub84B	0.6028	0.00883578	Down	53.495	28.5	14	5	1.22598	1.30249	1.20979	0.645281	0.694161	0.914007	0.876008	1.09326	1.03902	cytoplasm	K07374	TUBA; tubulin alpha	map04145 Phagosome		GO:0005622 intracellular; GO:0005623 cell; GO:0005856 cytoskeleton; GO:0043226 organelle; GO:0043228 non-membrane-bounded organelle; GO:0043229 intracellular organelle; GO:0043232 intracellular non-membrane-bounded organelle;		PF00091; PF03953	Tubulin/FtsZ family, GTPase domain; Tubulin C-terminal domain	Z	KOG1376	Alpha tubulin
TRINITY_DN2652_c0_g1_m.7049	Tropinone reductase homolog At2g29290 OS=Arabidopsis thaliana OX=3702 GN=At2g29290 PE=2 SV=1	At2g29290	0.3737	5.32276e-07	Down	29.234	52.7	11	9	0.841177	0.833309	0.836043	0.30522	0.310049	0.322899	1.91057	1.85699	1.78375	cytoplasm	K08081	TR1; tropinone reductase I [EC:1.1.1.206]	map00960 Tropane, piperidine and pyridine alkaloid biosynthesis; map01100 Metabolic pathways; map01110 Biosynthesis of secondary metabolites				PF13561	Enoyl-(Acyl carrier protein) reductase	Q	KOG0725	Reductases with broad range of substrate specificities
TRINITY_DN2657_c0_g3_m.7059	Reticulon-like protein B5 OS=Arabidopsis thaliana OX=3702 GN=RTNLB5 PE=1 SV=1	RTNLB5	1.6124	3.7189e-05	Up	30.918	17.3	7	7	0.8717	0.875023	0.822966	1.38131	1.41311	1.34898	0.740439	0.768921	0.777547	chloroplast				GO:0006996 organelle organization; GO:0007029 endoplasmic reticulum organization; GO:0009628 response to abiotic stimulus; GO:0009987 cellular process; GO:0010256 endomembrane system organization; GO:0016043 cellular component organization; GO:0050896 response to stimulus; GO:0071786 endoplasmic reticulum tubular network organization; GO:0071840 cellular component organization or biogenesis; GO:0…	GO:0005622 intracellular; GO:0005623 cell; GO:0005737 cytoplasm; GO:0005783 endoplasmic reticulum; GO:0005789 endoplasmic reticulum membrane; GO:0005794 Golgi apparatus; GO:0005886 plasma membrane; GO:0005911 cell-cell junction; GO:0009506 plasmodesma; GO:0012505 endomembrane system; GO:0016020 membrane; GO:0016021 integral component of membrane; GO:0030054 cell junction; GO:0030176 integral comp…				U	KOG1792	Reticulon
TRINITY_DN2674_c0_g1_m.7096	Probable pectin methylesterase CGR2 OS=Arabidopsis thaliana OX=3702 GN=CGR2 PE=2 SV=1	CGR2	0.6021	0.00185636	Down	28.704	48.3	10	9	1.34284	1.37338	1.66427	0.86739	0.875877	0.894396	0.678739	0.629506	0.673603	chloroplast
TRINITY_DN2683_c0_g2_m.7119	Pumilio homolog 5 OS=Arabidopsis thaliana OX=3702 GN=APUM5 PE=1 SV=2	APUM5	1.5091	0.000116161	Up	115.62	7.1	7	6	0.508637	0.512617	0.533972	0.818025	0.770249	0.758761	1.57943	1.76662	1.75169	nucleus	K17943	PUM; pumilio RNA-binding family		GO:0001101 response to acid chemical; GO:0002252 immune effector process; GO:0002376 immune system process; GO:0006417 regulation of translation; GO:0006950 response to stress; GO:0006952 defense response; GO:0006970 response to osmotic stress; GO:0009414 response to water deprivation; GO:0009415 response to water; GO:0009605 response to external stimulus; GO:0009607 response to biotic stimulus; …	GO:0005622 intracellular; GO:0005623 cell; GO:0005737 cytoplasm; GO:0005773 vacuole; GO:0005829 cytosol; GO:0043226 organelle; GO:0043227 membrane-bounded organelle; GO:0043229 intracellular organelle; GO:0043231 intracellular membrane-bounded organelle;	GO:0003676 nucleic acid binding; GO:0003723 RNA binding; GO:0003727 single-stranded RNA binding; GO:0003729 mRNA binding; GO:0005488 binding; GO:0097159 organic cyclic compound binding; GO:1901363 heterocyclic compound binding;			J	KOG1488	Translational repressor Pumilio/PUF3 and related RNA-binding proteins (Puf superfamily)
TRINITY_DN2700_c0_g1_m.7177	hypothetical protein L484_019425 [Morus notabilis]	--	1.5335	0.0100913	Up	60.817	11.5	4	4	0.793414	0.776578	0.736918	1.05711	1.08444	1.39617	0.89745	1.11887	1.13905	nucleus	K14798	LTV1; protein LTV1							S	KOG2637	Uncharacterized conserved protein
TRINITY_DN271_c2_g1_m.7255	Transcription factor VIP1 OS=Arabidopsis thaliana OX=3702 GN=VIP1 PE=1 SV=1	VIP1	1.5438	1.67297e-05	Up	42.042	37.8	13	12	0.791868	0.74497	0.770769	1.18219	1.18961	1.19078	0.99016	1.07687	1.06279	nucleus	K20557	VIP1; transcription factor VIP1	map04016 MAPK signaling pathway - plant	GO:0006355 regulation of transcription, DNA-templated; GO:0006810 transport; GO:0006811 ion transport; GO:0006820 anion transport; GO:0006913 nucleocytoplasmic transport; GO:0006950 response to stress; GO:0006970 response to osmotic stress; GO:0007154 cell communication; GO:0007165 signal transduction; GO:0007231 osmosensory signaling pathway; GO:0008272 sulfate transport; GO:0009267 cellular res…	GO:0005622 intracellular; GO:0005623 cell; GO:0005634 nucleus; GO:0005737 cytoplasm; GO:0005829 cytosol; GO:0043226 organelle; GO:0043227 membrane-bounded organelle; GO:0043229 intracellular organelle; GO:0043231 intracellular membrane-bounded organelle;	GO:0003676 nucleic acid binding; GO:0003677 DNA binding; GO:0003682 chromatin binding; GO:0003700 DNA-binding transcription factor activity; GO:0005488 binding; GO:0005515 protein binding; GO:0019899 enzyme binding; GO:0019900 kinase binding; GO:0019901 protein kinase binding; GO:0043565 sequence-specific DNA binding; GO:0043621 protein self-association; GO:0051019 mitogen-activated protein kinas…
TRINITY_DN27117_c1_g1_m.7213	Ubiquitin fusion degradation protein 1 homolog OS=Dictyostelium discoideum OX=44689 GN=ufd1 PE=3 SV=1	ufd1	1.9606	2.72931e-05	Up	69.48	26.7	12	12	0.523711	0.523179	0.551071	1.04433	0.997245	1.09141	1.41446	1.4206	1.43399	nucleus				GO:0006508 proteolysis; GO:0006511 ubiquitin-dependent protein catabolic process; GO:0006807 nitrogen compound metabolic process; GO:0008152 metabolic process; GO:0009056 catabolic process; GO:0009057 macromolecule catabolic process; GO:0009987 cellular process; GO:0019538 protein metabolic process; GO:0019941 modification-dependent protein catabolic process; GO:0030163 protein catabolic process;…					AO	KOG1816	Ubiquitin fusion-degradation protein
TRINITY_DN2723_c0_g1_m.7267	Cyclic nucleotide-gated ion channel 1 OS=Arabidopsis thaliana OX=3702 GN=CNGC1 PE=1 SV=1	CNGC1	0.6078	0.000815241	Down	75.345	11.5	6	6	1.28697	1.4272	1.40238	0.909054	0.806783	0.786314	0.800902	0.828628	0.751761	cytoplasm	K05391	CNGC; cyclic nucleotide gated channel, plant	map04626 Plant-pathogen interaction						PT	KOG0498	K+-channel ERG and related proteins, contain PAS/PAC sensor domain
TRINITY_DN2728_c0_g3_m.7291	Translation machinery-associated protein 22 OS=Schizosaccharomyces pombe (strain 972 / ATCC 24843) OX=284812 GN=tma22 PE=3 SV=1	tma22	1.745	2.12347e-05	Up	21.086	56.5	9	9	0.728938	0.732394	0.73956	1.27549	1.33526	1.22971	0.974436	1.00095	0.983269	chloroplast				GO:0001731 formation of translation preinitiation complex; GO:0002181 cytoplasmic translation; GO:0002183 cytoplasmic translational initiation; GO:0002188 translation reinitiation; GO:0002190 cap-independent translational initiation; GO:0002192 IRES-dependent translational initiation of linear mRNA; GO:0006412 translation; GO:0006413 translational initiation; GO:0006518 peptide metabolic process;…	GO:0005622 intracellular; GO:0005623 cell; GO:0005737 cytoplasm; GO:0032991 protein-containing complex; GO:0070992 translation initiation complex; GO:1990904 ribonucleoprotein complex;	GO:0003676 nucleic acid binding; GO:0003723 RNA binding; GO:0003729 mRNA binding; GO:0003743 translation initiation factor activity; GO:0005488 binding; GO:0008135 translation factor activity, RNA binding; GO:0043021 ribonucleoprotein complex binding; GO:0043022 ribosome binding; GO:0044877 protein-containing complex binding; GO:0097159 organic cyclic compound binding; GO:1901363 heterocyclic com…	PF01253	Translation initiation factor SUI1	J	KOG3239	Density-regulated protein related to translation initiation factor 1 (eIF-1/SUI1)
TRINITY_DN27311_c0_g1_m.7307	Light-harvesting complex-like protein 3 isotype 1, chloroplastic OS=Arabidopsis thaliana OX=3702 GN=LIL3.1 PE=1 SV=1	LIL3.1	0.6477	0.0204217	Down	28.139	25.4	6	6	1.22373	1.295	1.45232	0.985923	0.687983	0.898181	0.792148	0.833913	0.830798	chloroplast				GO:0006355 regulation of transcription, DNA-templated; GO:0006810 transport; GO:0009889 regulation of biosynthetic process; GO:0009891 positive regulation of biosynthetic process; GO:0009893 positive regulation of metabolic process; GO:0010380 regulation of chlorophyll biosynthetic process; GO:0010468 regulation of gene expression; GO:0010556 regulation of macromolecule biosynthetic process; GO:0…	GO:0005622 intracellular; GO:0005623 cell; GO:0005737 cytoplasm; GO:0009507 chloroplast; GO:0009534 chloroplast thylakoid; GO:0009535 chloroplast thylakoid membrane; GO:0009536 plastid; GO:0009579 thylakoid; GO:0016020 membrane; GO:0031976 plastid thylakoid; GO:0031984 organelle subcompartment; GO:0034357 photosynthetic membrane; GO:0042651 thylakoid membrane; GO:0043226 organelle; GO:0043227 mem…	GO:0003700 DNA-binding transcription factor activity; GO:0005488 binding; GO:0005515 protein binding; GO:0019899 enzyme binding; GO:0042802 identical protein binding; GO:0043495 protein-membrane adaptor activity; GO:0140110 transcription regulator activity;
TRINITY_DN2734_c0_g2_m.7319	Elongation factor 2 OS=Arabidopsis thaliana OX=3702 GN=LOS1 PE=1 SV=1	LOS1	1.6779	8.48147e-08	Up	93.745	57.3	47	24	0.618999	0.622727	0.624522	1.05069	1.03358	1.04708	1.35799	1.30104	1.34337	cytoplasm	K03234	EEF2; elongation factor 2		GO:0001101 response to acid chemical; GO:0006508 proteolysis; GO:0006807 nitrogen compound metabolic process; GO:0007154 cell communication; GO:0007165 signal transduction; GO:0008152 metabolic process; GO:0009719 response to endogenous stimulus; GO:0009725 response to hormone; GO:0009753 response to jasmonic acid; GO:0009755 hormone-mediated signaling pathway; GO:0009867 jasmonic acid mediated s…	GO:0005622 intracellular; GO:0005623 cell; GO:0005634 nucleus; GO:0005737 cytoplasm; GO:0005829 cytosol; GO:0043226 organelle; GO:0043227 membrane-bounded organelle; GO:0043229 intracellular organelle; GO:0043231 intracellular membrane-bounded organelle;	GO:0003824 catalytic activity; GO:0004843 thiol-dependent ubiquitin-specific protease activity; GO:0008233 peptidase activity; GO:0008234 cysteine-type peptidase activity; GO:0016787 hydrolase activity; GO:0019783 ubiquitin-like protein-specific protease activity; GO:0036459 thiol-dependent ubiquitinyl hydrolase activity; GO:0070011 peptidase activity, acting on L-amino acid peptides; GO:0101005 …	PF00009; PF03144; PF03764; PF00679	Elongation factor Tu GTP binding domain; Elongation factor Tu domain 2; Elongation factor G, domain IV; Elongation factor G C-terminus	O	KOG1863	Ubiquitin carboxyl-terminal hydrolase
TRINITY_DN2756_c0_g1_m.7407	LIM domain-containing protein WLIM2b OS=Arabidopsis thaliana OX=3702 GN=WLIM2B PE=1 SV=1	WLIM2B	0.5023	3.13767e-05	Down	21.046	51.6	9	9	1.56635	1.63187	1.6443	0.842868	0.824605	0.76477	0.582724	0.56313	0.579387	nucleus	K09377	CSRP; cysteine and glycine-rich protein		GO:0006996 organelle organization; GO:0007010 cytoskeleton organization; GO:0007015 actin filament organization; GO:0009987 cellular process; GO:0016043 cellular component organization; GO:0022607 cellular component assembly; GO:0030029 actin filament-based process; GO:0030036 actin cytoskeleton organization; GO:0044085 cellular component biogenesis; GO:0051017 actin filament bundle assembly; GO:…		GO:0003779 actin binding; GO:0005488 binding; GO:0005515 protein binding; GO:0008092 cytoskeletal protein binding; GO:0044877 protein-containing complex binding; GO:0051015 actin filament binding;	PF00412	LIM domain	TZ	KOG1700	Regulatory protein MLP and related LIM proteins
TRINITY_DN2766_c2_g1_m.7449	uncharacterized protein LOC21386270 [Morus notabilis]	--	1.8254	0.0107425	Up	265.79	2.6	5	5	0.901459	0.736088	0.979435	1.63145	1.84419	1.3014	0.489556	0.578335	0.538078	nucleus
TRINITY_DN28_c3_g1_m.7916	Ras-related protein RABA5b OS=Arabidopsis thaliana OX=3702 GN=RABA5B PE=1 SV=1	RABA5B	0.5442	7.99427e-05	Down	28.559	24.3	5	4	1.49922	1.47738	1.50201	0.772559	0.871779	0.793117	0.696124	0.68344	0.704376	chloroplast	K07976	RAB; Rab family, other		GO:0006810 transport; GO:0006891 intra-Golgi vesicle-mediated transport; GO:0006950 response to stress; GO:0009266 response to temperature stimulus; GO:0009408 response to heat; GO:0009628 response to abiotic stimulus; GO:0016192 vesicle-mediated transport; GO:0048193 Golgi vesicle transport; GO:0048219 inter-Golgi cisterna vesicle-mediated transport; GO:0050896 response to stimulus; GO:0051179 l…	GO:0005622 intracellular; GO:0005623 cell; GO:0005737 cytoplasm; GO:0005794 Golgi apparatus; GO:0005795 Golgi stack; GO:0005798 Golgi-associated vesicle; GO:0005802 trans-Golgi network; GO:0005829 cytosol; GO:0005886 plasma membrane; GO:0012505 endomembrane system; GO:0016020 membrane; GO:0031410 cytoplasmic vesicle; GO:0031982 vesicle; GO:0031984 organelle subcompartment; GO:0043226 organelle; G…	GO:0000166 nucleotide binding; GO:0001882 nucleoside binding; GO:0001883 purine nucleoside binding; GO:0003824 catalytic activity; GO:0003924 GTPase activity; GO:0005488 binding; GO:0005525 GTP binding; GO:0016462 pyrophosphatase activity; GO:0016787 hydrolase activity; GO:0016817 hydrolase activity, acting on acid anhydrides; GO:0016818 hydrolase activity, acting on acid anhydrides, in phosphoru…	PF00071	Ras family	U	KOG0087	GTPase Rab11/YPT3, small G protein superfamily
TRINITY_DN2801_c1_g1_m.7576	Protein KTI12 homolog OS=Arabidopsis thaliana OX=3702 GN=KTI12 PE=1 SV=1	KTI12	1.577	0.0032854	Up	34.008	33.4	8	8	0.757558	0.734605	0.809952	1.05686	1.30302	1.27048	0.999989	1.00159	1.06595	nucleus	K15456	KTI12; protein KTI12		GO:0001510 RNA methylation; GO:0002097 tRNA wobble base modification; GO:0002098 tRNA wobble uridine modification; GO:0006139 nucleobase-containing compound metabolic process; GO:0006355 regulation of transcription, DNA-templated; GO:0006357 regulation of transcription by RNA polymerase II; GO:0006396 RNA processing; GO:0006399 tRNA metabolic process; GO:0006400 tRNA modification; GO:0006725 cell…	GO:0005622 intracellular; GO:0005623 cell; GO:0032991 protein-containing complex; GO:0033588 Elongator holoenzyme complex;	GO:0005488 binding; GO:0005515 protein binding; GO:0005516 calmodulin binding;	PF08433	Chromatin associated protein KTI12	F	KOG3062	RNA polymerase II elongator associated protein
TRINITY_DN2809_c0_g1_m.7613	L-ascorbate oxidase homolog OS=Nicotiana tabacum OX=4097 PE=2 SV=1	--	0.461	9.51798e-06	Down	60.676	41	14	14	1.58375	1.6036	1.70381	0.738545	0.775435	0.740787	0.65394	0.602018	0.598119	cytoplasm	K19791	FET3_5; iron transport multicopper oxidase					PF07732; PF00394; PF07731	Multicopper oxidase; Multicopper oxidase; Multicopper oxidase	Q	KOG1263	Multicopper oxidases
TRINITY_DN2827_c0_g1_m.7682	Peroxidase 52 OS=Arabidopsis thaliana OX=3702 GN=PER52 PE=2 SV=1	PER52	0.518	0.00708987	Down	34.541	45.8	9	9	1.07072	0.987597	1.23558	0.536257	0.696596	0.473535	1.38722	1.32461	1.28789	chloroplast	K00430	E1.11.1.7; peroxidase [EC:1.11.1.7]	map00940 Phenylpropanoid biosynthesis; map01100 Metabolic pathways; map01110 Biosynthesis of secondary metabolites	GO:0006725 cellular aromatic compound metabolic process; GO:0008152 metabolic process; GO:0009058 biosynthetic process; GO:0009698 phenylpropanoid metabolic process; GO:0009699 phenylpropanoid biosynthetic process; GO:0009808 lignin metabolic process; GO:0009809 lignin biosynthetic process; GO:0009888 tissue development; GO:0009889 regulation of biosynthetic process; GO:0009891 positive regulatio…	GO:0005576 extracellular region; GO:0005618 cell wall; GO:0005622 intracellular; GO:0005623 cell; GO:0005737 cytoplasm; GO:0005794 Golgi apparatus; GO:0005829 cytosol; GO:0012505 endomembrane system; GO:0030312 external encapsulating structure; GO:0043226 organelle; GO:0043227 membrane-bounded organelle; GO:0043229 intracellular organelle; GO:0043231 intracellular membrane-bounded organelle; GO:0…		PF00141	Peroxidase
TRINITY_DN28477_c0_g1_m.7728	HVA22-like protein f OS=Arabidopsis thaliana OX=3702 GN=HVA22F PE=2 SV=1	HVA22F	0.5456	0.0209316	Down	18.032	14.1	2	2	1.32771	1.02702	1.34715	0.73883	0.607613		0.876139	0.971862	1.10368	chloroplast	K17279	REEP5_6; receptor expression-enhancing protein 5/6							U	KOG1725	Protein involved in membrane traffic (YOP1/TB2/DP1/HVA22 family)
TRINITY_DN285_c0_g3_m.7757	Cysteine proteinase inhibitor 12 OS=Oryza sativa subsp. japonica OX=39947 GN=Os01g0270100 PE=2 SV=1	Os01g0270100	1.7693	8.84152e-07	Up	26.772	61.5	13	13	0.672524	0.669804	0.672709	1.16475	1.21027	1.19026	1.14506	1.12298	1.15164	chloroplast				GO:0001101 response to acid chemical; GO:0006950 response to stress; GO:0006970 response to osmotic stress; GO:0006972 hyperosmotic response; GO:0006979 response to oxidative stress; GO:0009266 response to temperature stimulus; GO:0009409 response to cold; GO:0009414 response to water deprivation; GO:0009415 response to water; GO:0009628 response to abiotic stimulus; GO:0009892 negative regulatio…	GO:0005622 intracellular; GO:0005623 cell; GO:0005737 cytoplasm; GO:0005783 endoplasmic reticulum; GO:0005829 cytosol; GO:0012505 endomembrane system; GO:0043226 organelle; GO:0043227 membrane-bounded organelle; GO:0043229 intracellular organelle; GO:0043231 intracellular membrane-bounded organelle;	GO:0002020 protease binding; GO:0004857 enzyme inhibitor activity; GO:0004866 endopeptidase inhibitor activity; GO:0004869 cysteine-type endopeptidase inhibitor activity; GO:0005488 binding; GO:0005515 protein binding; GO:0019899 enzyme binding; GO:0030234 enzyme regulator activity; GO:0030414 peptidase inhibitor activity; GO:0043167 ion binding; GO:0043169 cation binding; GO:0046872 metal ion bi…	PF00031	Cystatin domain
TRINITY_DN28606_c0_g1_m.7763	Nicotianamine synthase OS=Solanum lycopersicum OX=4081 GN=CHLN PE=2 SV=1	CHLN	0.2387	2.94763e-06	Down	39.153	35.5	8	8	1.65757	1.61834	1.56772	0.382456	0.364041	0.409873				cytoplasm	K05953	E2.5.1.43; nicotianamine synthase [EC:2.5.1.43]		GO:0000003 reproduction; GO:0000902 cell morphogenesis; GO:0000904 cell morphogenesis involved in differentiation; GO:0003006 developmental process involved in reproduction; GO:0006810 transport; GO:0007275 multicellular organism development; GO:0009555 pollen development; GO:0009653 anatomical structure morphogenesis; GO:0009826 unidimensional cell growth; GO:0009856 pollination; GO:0009860 poll…
TRINITY_DN2876_c0_g1_m.7817	1,2-dihydroxy-3-keto-5-methylthiopentene dioxygenase 1 OS=Vitis vinifera OX=29760 GN=VIT_05s0020g04070 PE=3 SV=1	VIT_05s0020g04070	1.5726	0.000127727	Up	22.325	65.8	9	9	0.685444	0.6994	0.744896	1.12328	1.07831	1.14766	1.20094	1.1748	1.14527	cytoplasm	K08967	mtnD, mtnZ, ADI1; 1,2-dihydroxy-3-keto-5-methylthiopentene dioxygenase [EC:1.13.11.53 1.13.11.54]	map00270 Cysteine and methionine metabolism; map01100 Metabolic pathways	GO:0000096 sulfur amino acid metabolic process; GO:0000097 sulfur amino acid biosynthetic process; GO:0006082 organic acid metabolic process; GO:0006520 cellular amino acid metabolic process; GO:0006555 methionine metabolic process; GO:0006790 sulfur compound metabolic process; GO:0006807 nitrogen compound metabolic process; GO:0008152 metabolic process; GO:0008652 cellular amino acid biosyntheti…	GO:0005622 intracellular; GO:0005623 cell; GO:0005634 nucleus; GO:0005737 cytoplasm; GO:0005829 cytosol; GO:0005886 plasma membrane; GO:0016020 membrane; GO:0043226 organelle; GO:0043227 membrane-bounded organelle; GO:0043229 intracellular organelle; GO:0043231 intracellular membrane-bounded organelle; GO:0071944 cell periphery;	GO:0003824 catalytic activity; GO:0010309 acireductone dioxygenase [iron(II)-requiring] activity; GO:0016491 oxidoreductase activity; GO:0016701 oxidoreductase activity, acting on single donors with incorporation of molecular oxygen; GO:0016702 oxidoreductase activity, acting on single donors with incorporation of molecular oxygen, incorporation of two atoms of oxygen; GO:0051213 dioxygenase acti…	PF03079	ARD/ARD' family	IQ	KOG2107	Uncharacterized conserved protein, contains double-stranded beta-helix domain
TRINITY_DN289_c0_g1_m.7894	Probable aquaporin PIP2-8 OS=Arabidopsis thaliana OX=3702 GN=PIP2-8 PE=1 SV=1	PIP2-8	0.5954	0.000700921	Down	29.874	21.6	5	4	1.48305	1.45672	1.26953	0.872915	0.803438	0.829721	0.877677	0.72352	0.683433	plasma membrane	K09872	PIP; aquaporin PIP		GO:0001101 response to acid chemical; GO:0006810 transport; GO:0006811 ion transport; GO:0006833 water transport; GO:0006855 drug transmembrane transport; GO:0006950 response to stress; GO:0009414 response to water deprivation; GO:0009415 response to water; GO:0009628 response to abiotic stimulus; GO:0009719 response to endogenous stimulus; GO:0009725 response to hormone; GO:0009737 response to a…	GO:0005622 intracellular; GO:0005623 cell; GO:0005634 nucleus; GO:0005737 cytoplasm; GO:0005773 vacuole; GO:0005886 plasma membrane; GO:0005887 integral component of plasma membrane; GO:0005911 cell-cell junction; GO:0009506 plasmodesma; GO:0009507 chloroplast; GO:0009536 plastid; GO:0016020 membrane; GO:0016021 integral component of membrane; GO:0030054 cell junction; GO:0031224 intrinsic compon…	GO:0003676 nucleic acid binding; GO:0003723 RNA binding; GO:0003729 mRNA binding; GO:0005215 transporter activity; GO:0005372 water transmembrane transporter activity; GO:0005488 binding; GO:0005515 protein binding; GO:0015250 water channel activity; GO:0015267 channel activity; GO:0015318 inorganic molecular entity transmembrane transporter activity; GO:0019899 enzyme binding; GO:0022803 passive…			G	KOG0223	Aquaporin (major intrinsic protein family)
TRINITY_DN289_c0_g3_m.7898	Aquaporin PIP2-2 OS=Arabidopsis thaliana OX=3702 GN=PIP2-2 PE=1 SV=2	PIP2-2	0.4761	3.42965e-06	Down	30.241	14.3	3	3	1.39251	1.46382	1.42688	0.699553	0.670189	0.669473	0.890104	0.887374	0.900095	plasma membrane	K09872	PIP; aquaporin PIP		GO:0001101 response to acid chemical; GO:0006810 transport; GO:0006811 ion transport; GO:0006833 water transport; GO:0006855 drug transmembrane transport; GO:0006950 response to stress; GO:0009414 response to water deprivation; GO:0009415 response to water; GO:0009628 response to abiotic stimulus; GO:0009719 response to endogenous stimulus; GO:0009725 response to hormone; GO:0009737 response to a…	GO:0005622 intracellular; GO:0005623 cell; GO:0005634 nucleus; GO:0005737 cytoplasm; GO:0005773 vacuole; GO:0005886 plasma membrane; GO:0005887 integral component of plasma membrane; GO:0005911 cell-cell junction; GO:0009506 plasmodesma; GO:0009507 chloroplast; GO:0009536 plastid; GO:0016020 membrane; GO:0016021 integral component of membrane; GO:0030054 cell junction; GO:0031224 intrinsic compon…	GO:0003676 nucleic acid binding; GO:0003723 RNA binding; GO:0003729 mRNA binding; GO:0005215 transporter activity; GO:0005372 water transmembrane transporter activity; GO:0005488 binding; GO:0005515 protein binding; GO:0015250 water channel activity; GO:0015267 channel activity; GO:0015318 inorganic molecular entity transmembrane transporter activity; GO:0019899 enzyme binding; GO:0022803 passive…			G	KOG0223	Aquaporin (major intrinsic protein family)
TRINITY_DN289_c0_g4_m.7899	Aquaporin PIP2-7 OS=Zea mays OX=4577 GN=PIP2-7 PE=2 SV=1	PIP2-7	0.6062	8.18857e-06	Down	33.604	29.4	6	5	1.21935	1.23765	1.2312	0.743893	0.724528	0.76733	1.04113	1.04297	0.991949	chloroplast	K09872	PIP; aquaporin PIP		GO:0001101 response to acid chemical; GO:0006810 transport; GO:0006811 ion transport; GO:0006833 water transport; GO:0006855 drug transmembrane transport; GO:0006950 response to stress; GO:0009414 response to water deprivation; GO:0009415 response to water; GO:0009628 response to abiotic stimulus; GO:0009719 response to endogenous stimulus; GO:0009725 response to hormone; GO:0009737 response to a…	GO:0005622 intracellular; GO:0005623 cell; GO:0005634 nucleus; GO:0005737 cytoplasm; GO:0005773 vacuole; GO:0005886 plasma membrane; GO:0005887 integral component of plasma membrane; GO:0005911 cell-cell junction; GO:0009506 plasmodesma; GO:0009507 chloroplast; GO:0009536 plastid; GO:0016020 membrane; GO:0016021 integral component of membrane; GO:0030054 cell junction; GO:0031224 intrinsic compon…	GO:0003676 nucleic acid binding; GO:0003723 RNA binding; GO:0003729 mRNA binding; GO:0005215 transporter activity; GO:0005372 water transmembrane transporter activity; GO:0005488 binding; GO:0005515 protein binding; GO:0015250 water channel activity; GO:0015267 channel activity; GO:0015318 inorganic molecular entity transmembrane transporter activity; GO:0019899 enzyme binding; GO:0022803 passive…			P	KOG0223	Aquaporin (major intrinsic protein family)
TRINITY_DN2892_c1_g1_m.7871	Protein FMP32, mitochondrial OS=Saccharomyces cerevisiae (strain ATCC 204508 / S288c) OX=559292 GN=FMP32 PE=1 SV=1	FMP32	0.5933	0.0131299	Down	23.701	26.3	4	4	0.997478	1.19006	1.37412	0.602357	0.720465	0.79037	1.23984	1.05689	1.02842	chloroplast									S	KOG3156	Uncharacterized membrane protein
TRINITY_DN2893_c0_g1_m.7880	Putative methyltransferase DDB_G0268948 OS=Dictyostelium discoideum OX=44689 GN=DDB_G0268948 PE=1 SV=2	DDB_G0268948	10.6096	0.00135461	Up	26.53	43.8	12	12	0.022332	0.044493	0.057045	0.341239	0.48602	0.486946	2.70217	2.44653	2.41323	cytoplasm				GO:0008152 metabolic process; GO:0032259 methylation;	GO:0005622 intracellular; GO:0005623 cell; GO:0005737 cytoplasm;	GO:0003824 catalytic activity; GO:0008168 methyltransferase activity; GO:0008757 S-adenosylmethionine-dependent methyltransferase activity; GO:0016740 transferase activity; GO:0016741 transferase activity, transferring one-carbon groups;	PF08241	Methyltransferase domain	Q	KOG3010	Methyltransferase
TRINITY_DN29_c0_g2_m.8211	Tubulin beta-1 chain OS=Lupinus albus OX=3870 GN=TUBB1 PE=3 SV=1	TUBB1	0.5376	1.37211e-05	Down	50.34	69.8	27	5	1.55905	1.60324	1.60357	0.884695	0.857962	0.819246	0.566779	0.544739	0.560717	nucleus	K07375	TUBB; tubulin beta	map04145 Phagosome		GO:0005622 intracellular; GO:0005623 cell; GO:0005856 cytoskeleton; GO:0043226 organelle; GO:0043228 non-membrane-bounded organelle; GO:0043229 intracellular organelle; GO:0043232 intracellular non-membrane-bounded organelle;		PF00091; PF03953	Tubulin/FtsZ family, GTPase domain; Tubulin C-terminal domain	Z	KOG1375	Beta tubulin
TRINITY_DN29_c0_g4_m.8215	Tubulin beta-5 chain OS=Oryza sativa subsp. japonica OX=39947 GN=TUBB5 PE=1 SV=1	TUBB5	0.6433	1.02406e-06	Down	54.419	69.2	29	7	1.46637	1.44115	1.4629	0.949136	0.925973	0.936462	0.621396	0.591341	0.605277	peroxisome	K07375	TUBB; tubulin beta	map04145 Phagosome	GO:0006996 organelle organization; GO:0007010 cytoskeleton organization; GO:0009987 cellular process; GO:0010035 response to inorganic substance; GO:0010038 response to metal ion; GO:0016043 cellular component organization; GO:0042221 response to chemical; GO:0046686 response to cadmium ion; GO:0050896 response to stimulus; GO:0071840 cellular component organization or biogenesis;	GO:0005576 extracellular region; GO:0005618 cell wall; GO:0005622 intracellular; GO:0005623 cell; GO:0005737 cytoplasm; GO:0005773 vacuole; GO:0005774 vacuolar membrane; GO:0005794 Golgi apparatus; GO:0005829 cytosol; GO:0005856 cytoskeleton; GO:0005886 plasma membrane; GO:0005911 cell-cell junction; GO:0009506 plasmodesma; GO:0009507 chloroplast; GO:0009532 plastid stroma; GO:0009536 plastid; GO…	GO:0003676 nucleic acid binding; GO:0003723 RNA binding; GO:0003729 mRNA binding; GO:0005198 structural molecule activity; GO:0005200 structural constituent of cytoskeleton; GO:0005488 binding; GO:0097159 organic cyclic compound binding; GO:1901363 heterocyclic compound binding;	PF00091; PF03953	Tubulin/FtsZ family, GTPase domain; Tubulin C-terminal domain	Z	KOG1375	Beta tubulin
TRINITY_DN290_c2_g1_m.7942	Ferredoxin--NADP reductase, leaf isozyme, chloroplastic OS=Pisum sativum OX=3888 GN=PETH PE=1 SV=1	PETH	0.4804	0.000573975	Down	40.244	31	7	7	1.70411	1.67128	1.41369	0.703308	0.812736	0.784494	0.486015	0.424362		chloroplast	K02641	petH; ferredoxin--NADP+ reductase [EC:1.18.1.2]	map00195 Photosynthesis; map01100 Metabolic pathways	GO:0006091 generation of precursor metabolites and energy; GO:0006950 response to stress; GO:0006952 defense response; GO:0008152 metabolic process; GO:0009605 response to external stimulus; GO:0009607 response to biotic stimulus; GO:0009617 response to bacterium; GO:0009767 photosynthetic electron transport chain; GO:0009987 cellular process; GO:0015979 photosynthesis; GO:0019684 photosynthesis,…	GO:0005576 extracellular region; GO:0005622 intracellular; GO:0005623 cell; GO:0005737 cytoplasm; GO:0009507 chloroplast; GO:0009526 plastid envelope; GO:0009532 plastid stroma; GO:0009534 chloroplast thylakoid; GO:0009535 chloroplast thylakoid membrane; GO:0009536 plastid; GO:0009570 chloroplast stroma; GO:0009579 thylakoid; GO:0009941 chloroplast envelope; GO:0016020 membrane; GO:0031967 organe…	GO:0003676 nucleic acid binding; GO:0003723 RNA binding; GO:0003727 single-stranded RNA binding; GO:0003824 catalytic activity; GO:0005488 binding; GO:0005515 protein binding; GO:0008187 poly-pyrimidine tract binding; GO:0008266 poly(U) RNA binding; GO:0009055 electron transfer activity; GO:0016491 oxidoreductase activity; GO:0019904 protein domain specific binding; GO:0045156 electron transporte…	PF00175	Oxidoreductase NAD-binding domain	C	KOG1158	NADP/FAD dependent oxidoreductase
TRINITY_DN293_c0_g1_m.8018	Proline-rich receptor-like protein kinase PERK1 OS=Arabidopsis thaliana OX=3702 GN=PERK1 PE=1 SV=1	PERK1	0.4865	4.42228e-05	Down	75.812	17.8	9	9	1.43305	1.534	1.63071	0.738786	0.751363	0.746708	0.722995	0.711164	0.731225	nucleus				GO:0006464 cellular protein modification process; GO:0006468 protein phosphorylation; GO:0006793 phosphorus metabolic process; GO:0006796 phosphate-containing compound metabolic process; GO:0006807 nitrogen compound metabolic process; GO:0006950 response to stress; GO:0007154 cell communication; GO:0007165 signal transduction; GO:0007166 cell surface receptor signaling pathway; GO:0007167 enzyme …	GO:0005623 cell; GO:0005886 plasma membrane; GO:0016020 membrane; GO:0071944 cell periphery;	GO:0003824 catalytic activity; GO:0004672 protein kinase activity; GO:0004674 protein serine/threonine kinase activity; GO:0004675 transmembrane receptor protein serine/threonine kinase activity; GO:0004888 transmembrane signaling receptor activity; GO:0016301 kinase activity; GO:0016740 transferase activity; GO:0016772 transferase activity, transferring phosphorus-containing groups; GO:0016773 p…	PF07714	Protein tyrosine kinase	T	KOG1187	Serine/threonine protein kinase
TRINITY_DN29364_c0_g2_m.8010	Epoxide hydrolase A OS=Mycobacterium tuberculosis (strain ATCC 25618 / H37Rv) OX=83332 GN=ephA PE=1 SV=1	ephA	2.3516	1.38581e-06	Up	36.509	47	13	11	0.478534	0.460981	0.475149	1.12489	1.0762	1.12557	1.45194	1.41295	1.39379	chloroplast				GO:0001676 long-chain fatty acid metabolic process; GO:0002532 production of molecular mediator involved in inflammatory response; GO:0002538 arachidonic acid metabolite production involved in inflammatory response; GO:0002539 prostaglandin production involved in inflammatory response; GO:0003008 system process; GO:0003013 circulatory system process; GO:0003018 vascular process in circulatory sys…	GO:0005622 intracellular; GO:0005623 cell; GO:0005737 cytoplasm; GO:0005777 peroxisome; GO:0005782 peroxisomal matrix; GO:0005829 cytosol; GO:0031907 microbody lumen; GO:0031974 membrane-enclosed lumen; GO:0042579 microbody; GO:0043226 organelle; GO:0043227 membrane-bounded organelle; GO:0043229 intracellular organelle; GO:0043231 intracellular membrane-bounded organelle; GO:0043233 organelle lum…	GO:0000287 magnesium ion binding; GO:0003824 catalytic activity; GO:0004301 epoxide hydrolase activity; GO:0005102 signaling receptor binding; GO:0005488 binding; GO:0005515 protein binding; GO:0015643 toxic substance binding; GO:0016787 hydrolase activity; GO:0016788 hydrolase activity, acting on ester bonds; GO:0016791 phosphatase activity; GO:0016801 hydrolase activity, acting on ether bonds; …	PF12697	Alpha/beta hydrolase family	I	KOG4178	Soluble epoxide hydrolase
TRINITY_DN29392_c0_g1_m.8014	Peroxidase 68 OS=Arabidopsis thaliana OX=3702 GN=PER68 PE=2 SV=1	PER68	1.9382	0.000100614	Up	28.115	31	4	4	0.69133	0.700894	0.655203	1.23149	1.39844	1.33836	0.977613	0.996172	1.0105	chloroplast	K00430	E1.11.1.7; peroxidase [EC:1.11.1.7]	map00940 Phenylpropanoid biosynthesis; map01100 Metabolic pathways; map01110 Biosynthesis of secondary metabolites				PF00141	Peroxidase
TRINITY_DN29392_c0_g1_m.8015	Peroxidase 68 OS=Arabidopsis thaliana OX=3702 GN=PER68 PE=2 SV=1	PER68	2.1128	2.94075e-07	Up	14.699	71.4	8	8	0.616433	0.616947	0.627286	1.32854	1.3162	1.28641	1.08164	1.06034	1.06621	mitochondria	K00430	E1.11.1.7; peroxidase [EC:1.11.1.7]	map00940 Phenylpropanoid biosynthesis; map01100 Metabolic pathways; map01110 Biosynthesis of secondary metabolites				PF00141	Peroxidase
TRINITY_DN2946_c0_g1_m.8057	uncharacterized protein LOC112092948 [Morus notabilis]	--	0.6658	6.25838e-06	Down	176.39	37.8	43	43	1.2153	1.24686	1.21053	0.828469	0.802691	0.814007	0.961371	0.945894	0.97487	cytoplasm
TRINITY_DN2949_c0_g1_m.8071	ABC transporter B family member 9 OS=Arabidopsis thaliana OX=3702 GN=ABCB9 PE=3 SV=2	ABCB9	1.8724	0.000188985	Up	138.72	15.3	13	9	0.743086	0.71722	0.650415	1.38475	1.27143	1.29585	0.875951	1.06129		plasma membrane	K05658	ABCB1, CD243; ATP-binding cassette, subfamily B (MDR/TAP), member 1 [EC:7.6.2.2]	map02010 ABC transporters	GO:0006810 transport; GO:0009914 hormone transport; GO:0009926 auxin polar transport; GO:0009966 regulation of signal transduction; GO:0010315 auxin efflux; GO:0010540 basipetal auxin transport; GO:0010646 regulation of cell communication; GO:0010817 regulation of hormone levels; GO:0010928 regulation of auxin mediated signaling pathway; GO:0023051 regulation of signaling; GO:0048583 regulation o…	GO:0005623 cell; GO:0005886 plasma membrane; GO:0005911 cell-cell junction; GO:0009506 plasmodesma; GO:0016020 membrane; GO:0030054 cell junction; GO:0055044 symplast; GO:0071944 cell periphery;	GO:0005215 transporter activity; GO:0010329 auxin efflux transmembrane transporter activity; GO:0015562 efflux transmembrane transporter activity; GO:0022857 transmembrane transporter activity; GO:0080161 auxin transmembrane transporter activity;	PF00005	ABC transporter	Q	KOG0055	Multidrug/pheromone exporter, ABC superfamily
TRINITY_DN2950_c0_g2_m.8082	Polyphenol oxidase, chloroplastic OS=Malus domestica OX=3750 PE=2 SV=1	--	3.6153	0.000147607	Up	54.329	29	9	9	0.228992	0.312261	0.266607	1.00013	0.985135	0.935351	2.00102	1.67211	1.5984	chloroplast	K00422	E1.10.3.1; polyphenol oxidase [EC:1.10.3.1]	map00350 Tyrosine metabolism; map00950 Isoquinoline alkaloid biosynthesis; map01100 Metabolic pathways; map01110 Biosynthesis of secondary metabolites				PF00264; PF12142; PF12143	Common central domain of tyrosinase; Polyphenol oxidase middle domain; Protein of unknown function (DUF_B2219)
TRINITY_DN2954_c0_g1_m.8091	17.4 kDa class III heat shock protein OS=Arabidopsis thaliana OX=3702 GN=HSP17.4B PE=2 SV=1	HSP17.4B	2.9699	2.03916e-05	Up	18.051	33.5	4	4	0.467834	0.454745	0.522966	1.45246	1.37591	1.46471	1.16845	0.974491	1.11845	cytoplasm	K13993	HSP20; HSP20 family protein	map04141 Protein processing in endoplasmic reticulum						O	KOG0710	Molecular chaperone (small heat-shock protein Hsp26/Hsp42)
TRINITY_DN2964_c0_g1_m.8115	Benzyl alcohol O-benzoyltransferase OS=Nicotiana tabacum OX=4097 GN=HSR201 PE=1 SV=1	HSR201	0.5099	4.7307e-06	Down	49.567	40.3	14	14	1.16224	1.14847	1.12062	0.594769	0.563613	0.591121	1.31522	1.23236	1.27158	cytoplasm	K19861	BEBT, AMAT; benzyl alcohol O-benzoyltransferase [EC:2.3.1.196 2.3.1.232]
TRINITY_DN298_c1_g1_m.8185	Pectinesterase 31 OS=Arabidopsis thaliana OX=3702 GN=PME31 PE=1 SV=1	PME31	1.8769	7.35464e-07	Up	35.263	42.7	9	9	0.662399	0.667353	0.667395	1.2778	1.23016	1.24058	1.09544	1.09013	1.06875	cytoplasm	K01051	E3.1.1.11; pectinesterase [EC:3.1.1.11]	map00040 Pentose and glucuronate interconversions; map01100 Metabolic pathways	GO:0005975 carbohydrate metabolic process; GO:0005976 polysaccharide metabolic process; GO:0006950 response to stress; GO:0006952 defense response; GO:0008152 metabolic process; GO:0009605 response to external stimulus; GO:0009607 response to biotic stimulus; GO:0009617 response to bacterium; GO:0009987 cellular process; GO:0010393 galacturonan metabolic process; GO:0017144 drug metabolic process…		GO:0003824 catalytic activity; GO:0016787 hydrolase activity; GO:0016788 hydrolase activity, acting on ester bonds; GO:0030599 pectinesterase activity; GO:0052689 carboxylic ester hydrolase activity;
TRINITY_DN2980_c0_g1_m.8161	Iron-sulfur assembly protein IscA-like 1, mitochondrial OS=Arabidopsis thaliana OX=3702 GN=At2g16710 PE=2 SV=2	At2g16710	1.5874	0.00207908	Up	15.283	28.6	3	3	0.69305	0.608654	0.575674	0.958027	1.06478	0.957406	1.27463	1.50619	1.36159	chloroplast	K22063	ISCA1; iron-sulfur cluster assembly 1							P	KOG1120	Fe-S cluster biosynthesis protein ISA1 (contains a HesB-like domain)
TRINITY_DN3_c0_g1_m.10990	FAM10 family protein At4g22670 OS=Arabidopsis thaliana OX=3702 GN=At4g22670 PE=1 SV=1	At4g22670	2.1979	5.36015e-07	Up	42.633	35.6	13	11	0.605442	0.609073	0.595575	1.33064	1.35081	1.29703	1.08143	1.07719	1.0528	nucleus	K09560	ST13; suppressor of tumorigenicity protein 13		GO:0010035 response to inorganic substance; GO:0010038 response to metal ion; GO:0042221 response to chemical; GO:0046686 response to cadmium ion; GO:0050896 response to stimulus;	GO:0005622 intracellular; GO:0005623 cell; GO:0005737 cytoplasm; GO:0005829 cytosol;				OT	KOG1308	Hsp70-interacting protein Hip/Transient component of progesterone receptor complexes and an Hsp70-binding protein
TRINITY_DN302_c0_g3_m.8305	V-type proton ATPase subunit F OS=Arabidopsis thaliana OX=3702 GN=VHA-F PE=2 SV=1	VHA-F	0.6645	5.06431e-05	Down	14.51	42.3	6	4	1.13151	1.05555	1.0685	0.725994	0.713325	0.724075	1.2544	1.14653	1.18011	chloroplast	K02151	ATPeV1F, ATP6S14; V-type H+-transporting ATPase subunit F	map00190 Oxidative phosphorylation; map01100 Metabolic pathways; map04145 Phagosome						C	KOG3432	Vacuolar H+-ATPase V1 sector, subunit F
TRINITY_DN3022_c0_g3_m.8289	Phototropin-1 OS=Arabidopsis thaliana OX=3702 GN=PHOT1 PE=1 SV=1	PHOT1	0.4877	4.95549e-06	Down	93.247	34.2	22	22	1.54978	1.56033	1.5937	0.734365	0.779455	0.780057	0.652481	0.691751	0.658084	cytoplasm	K20715	PHOT; phototropin [EC:2.7.11.1]		GO:0006464 cellular protein modification process; GO:0006468 protein phosphorylation; GO:0006793 phosphorus metabolic process; GO:0006796 phosphate-containing compound metabolic process; GO:0006807 nitrogen compound metabolic process; GO:0006996 organelle organization; GO:0007154 cell communication; GO:0007165 signal transduction; GO:0007623 circadian rhythm; GO:0008152 metabolic process; GO:0009…	GO:0005622 intracellular; GO:0005623 cell; GO:0005634 nucleus; GO:0005737 cytoplasm; GO:0005773 vacuole; GO:0005794 Golgi apparatus; GO:0005886 plasma membrane; GO:0009898 cytoplasmic side of plasma membrane; GO:0009986 cell surface; GO:0012505 endomembrane system; GO:0016020 membrane; GO:0043226 organelle; GO:0043227 membrane-bounded organelle; GO:0043229 intracellular organelle; GO:0043231 intr…	GO:0000166 nucleotide binding; GO:0003676 nucleic acid binding; GO:0003723 RNA binding; GO:0003729 mRNA binding; GO:0003824 catalytic activity; GO:0004672 protein kinase activity; GO:0004674 protein serine/threonine kinase activity; GO:0005488 binding; GO:0005515 protein binding; GO:0009881 photoreceptor activity; GO:0009882 blue light photoreceptor activity; GO:0010181 FMN binding; GO:0016301 ki…	PF13426; PF00069	PAS domain; Protein kinase domain	T	KOG0610	Putative serine/threonine protein kinase
TRINITY_DN3029_c0_g1_m.8304	Uncharacterized aarF domain-containing protein kinase 1 OS=Homo sapiens OX=9606 GN=ADCK1 PE=1 SV=2	ADCK1	0.6275	9.75594e-05	Down	54.871	14.7	5	5	1.33831	1.40976	1.44354	0.91134	0.862606	0.856163	0.748855	0.727511	0.701921	cytoplasm	K08869	ADCK, ABC1; aarF domain-containing kinase							S	KOG1235	Predicted unusual protein kinase
TRINITY_DN3036_c2_g1_m.8316	Probable glucan endo-1,3-beta-glucosidase A6 OS=Arabidopsis thaliana OX=3702 GN=A6 PE=2 SV=1	A6	1.5582	5.37428e-05	Up	51.671	40.6	13	13	0.827068	0.816911	0.767119	1.26909	1.25045	1.23755	0.966288	0.926958	0.938566	chloroplast				GO:0000003 reproduction; GO:0003006 developmental process involved in reproduction; GO:0007275 multicellular organism development; GO:0009555 pollen development; GO:0009653 anatomical structure morphogenesis; GO:0009790 embryo development; GO:0009791 post-embryonic development; GO:0009793 embryo development ending in seed dormancy; GO:0009987 cellular process; GO:0010154 fruit development; GO:001…	GO:0005623 cell; GO:0005886 plasma membrane; GO:0016020 membrane; GO:0031224 intrinsic component of membrane; GO:0031225 anchored component of membrane; GO:0031226 intrinsic component of plasma membrane; GO:0046658 anchored component of plasma membrane; GO:0071944 cell periphery;	GO:0003824 catalytic activity; GO:0004553 hydrolase activity, hydrolyzing O-glycosyl compounds; GO:0005488 binding; GO:0016787 hydrolase activity; GO:0016798 hydrolase activity, acting on glycosyl bonds; GO:0030246 carbohydrate binding; GO:0030247 polysaccharide binding;	PF00332; PF07983	Glycosyl hydrolases family 17; X8 domain
TRINITY_DN3062_c0_g1_m.8382	RAB6A-GEF complex partner protein 1 OS=Mus musculus OX=10090 GN=Ric1 PE=1 SV=2	Ric1	0.5418	0.0137216	Down	127.22	4.2	3	3	1.36407	1.04232	1.65904	0.78566	0.672462	0.744509	0.851432	0.888552	0.991947	chloroplast	K20476	RIC1; RAB6A-GEF complex partner protein 1							S	KOG2006	WD40 repeat protein
TRINITY_DN3064_c0_g1_m.8386	PsbP domain-containing protein 3, chloroplastic OS=Arabidopsis thaliana OX=3702 GN=PPD3 PE=1 SV=2	PPD3	0.5006	0.000529395	Down	28.691	8.8	2	2	1.27892	1.37748	1.34199	0.686541	0.728847	0.58623				chloroplast					GO:0005622 intracellular; GO:0005623 cell; GO:0005737 cytoplasm; GO:0009507 chloroplast; GO:0009534 chloroplast thylakoid; GO:0009535 chloroplast thylakoid membrane; GO:0009536 plastid; GO:0009579 thylakoid; GO:0016020 membrane; GO:0031976 plastid thylakoid; GO:0031977 thylakoid lumen; GO:0031984 organelle subcompartment; GO:0034357 photosynthetic membrane; GO:0042651 thylakoid membrane; GO:00432…		PF01789	PsbP
TRINITY_DN3068_c0_g1_m.8392	Phosphatidylinositol-glycan biosynthesis class X protein OS=Rattus norvegicus OX=10116 GN=Pigx PE=1 SV=2	Pigx	1.5436	0.00693454	Up	46.85	13.2	3	3	0.990829	0.847655	0.764161	1.23994	1.42574	1.35178	0.525929	0.865686	0.988281	plasma membrane	K07541	PIGX; GPI mannosyltransferase 1 subunit X	map00563 Glycosylphosphatidylinositol (GPI)-anchor biosynthesis; map01100 Metabolic pathways				PF08320	PIG-X / PBN1
TRINITY_DN3084_c0_g1_m.8442	Thioredoxin H-type OS=Ricinus communis OX=3988 PE=3 SV=1	--	0.5649	0.000364691	Down	13.236	57.1	6	6	1.43584	1.51057	1.50752	0.763719	0.85136	0.901065	0.635004	0.712505	0.682416	chloroplast	K03671	trxA; thioredoxin 1		GO:0006950 response to stress; GO:0006979 response to oxidative stress; GO:0008152 metabolic process; GO:0009636 response to toxic substance; GO:0009987 cellular process; GO:0019725 cellular homeostasis; GO:0033554 cellular response to stress; GO:0034599 cellular response to oxidative stress; GO:0042221 response to chemical; GO:0042592 homeostatic process; GO:0043085 positive regulation of cataly…	GO:0005576 extracellular region; GO:0005622 intracellular; GO:0005623 cell; GO:0005737 cytoplasm; GO:0005829 cytosol; GO:0048046 apoplast;	GO:0003824 catalytic activity; GO:0004791 thioredoxin-disulfide reductase activity; GO:0008047 enzyme activator activity; GO:0015035 protein disulfide oxidoreductase activity; GO:0015036 disulfide oxidoreductase activity; GO:0016209 antioxidant activity; GO:0016491 oxidoreductase activity; GO:0016651 oxidoreductase activity, acting on NAD(P)H; GO:0016667 oxidoreductase activity, acting on a sulfu…	PF00085	Thioredoxin	O	KOG0907	Thioredoxin
TRINITY_DN30886_c0_g1_m.8447	proline-rich protein 36 [Morus notabilis]	--	1.8918	2.53829e-05	Up	57.408	15.5	6	5	0.515001	0.513422	0.550997	0.970243	0.987917	1.0298	1.48034	1.47363	1.47865	chloroplast							PF00564	PB1 domain
TRINITY_DN3090_c0_g1_m.8459	ABA stress and ripening protein [Morus alba var. atropurpurea]	--	1.5885	2.8607e-05	Up	15.194	61.4	5	5	0.860138	0.813944	0.864489	1.31758	1.35889	1.3561	0.735102	0.857323	0.836429	nucleus
TRINITY_DN3105_c0_g3_m.8513	Temperature-induced lipocalin-1 OS=Arabidopsis thaliana OX=3702 GN=TIL PE=1 SV=1	TIL	2.5476	0.000416753	Up	21.379	44.9	9	9	0.45569	0.44442	0.575631	1.31734	1.24829	1.19392	1.25188	1.33719	1.17565	chloroplast	K03098	APOD; apolipoprotein D and lipocalin family protein			GO:0005623 cell; GO:0009279 cell outer membrane; GO:0016020 membrane; GO:0019867 outer membrane; GO:0030312 external encapsulating structure; GO:0030313 cell envelope; GO:0031975 envelope; GO:0071944 cell periphery;		PF08212	Lipocalin-like domain	M	KOG4824	Apolipoprotein D/Lipocalin
TRINITY_DN3111_c0_g2_m.8546	BTB/POZ and MATH domain-containing protein 4 OS=Arabidopsis thaliana OX=3702 GN=BPM4 PE=1 SV=1	BPM4	2.0334	1.08999e-05	Up	30.991	20.9	4	4	0.839686	0.816398	0.793668	1.71781	1.60063	1.66279	0.503774	0.502632	0.56261	chloroplast	K11294	NCL, NSR1; nucleolin		GO:0001101 response to acid chemical; GO:0002376 immune system process; GO:0006950 response to stress; GO:0006952 defense response; GO:0006955 immune response; GO:0009266 response to temperature stimulus; GO:0009409 response to cold; GO:0009628 response to abiotic stimulus; GO:0009631 cold acclimation; GO:0009719 response to endogenous stimulus; GO:0009725 response to hormone; GO:0009737 response…	GO:0005622 intracellular; GO:0005623 cell; GO:0005737 cytoplasm; GO:0009507 chloroplast; GO:0009526 plastid envelope; GO:0009532 plastid stroma; GO:0009534 chloroplast thylakoid; GO:0009535 chloroplast thylakoid membrane; GO:0009536 plastid; GO:0009570 chloroplast stroma; GO:0009579 thylakoid; GO:0009941 chloroplast envelope; GO:0010319 stromule; GO:0016020 membrane; GO:0031967 organelle envelope…	GO:0003676 nucleic acid binding; GO:0003723 RNA binding; GO:0003727 single-stranded RNA binding; GO:0003729 mRNA binding; GO:0005488 binding; GO:0008187 poly-pyrimidine tract binding; GO:0008266 poly(U) RNA binding; GO:0097159 organic cyclic compound binding; GO:1901363 heterocyclic compound binding;	PF00076	RNA recognition motif. (a.k.a. RRM, RBD, or RNP domain)	A	KOG0118	FOG: RRM domain
TRINITY_DN3119_c0_g4_m.8573	Fructose-bisphosphate aldolase 6, cytosolic OS=Arabidopsis thaliana OX=3702 GN=FBA6 PE=1 SV=1	FBA6	0.2938	0.000732081	Down	39.876	56.1	18	9	2.08584	1.94878	1.76458	0.539493	0.460958	0.703447	0.429391	0.533322	0.534189	cytoplasm	K01623	ALDO; fructose-bisphosphate aldolase, class I [EC:4.1.2.13]	map00010 Glycolysis / Gluconeogenesis; map00030 Pentose phosphate pathway; map00051 Fructose and mannose metabolism; map00710 Carbon fixation in photosynthetic organisms; map01100 Metabolic pathways; map01110 Biosynthesis of secondary metabolites; map01200 Carbon metabolism; map01230 Biosynthesis of amino acids		GO:0005622 intracellular; GO:0005623 cell; GO:0005737 cytoplasm;		PF00274	Fructose-bisphosphate aldolase class-I	G	KOG1557	Fructose-biphosphate aldolase
TRINITY_DN3131_c0_g2_m.8606	Probable glycosyltransferase STELLO1 OS=Arabidopsis thaliana OX=3702 GN=STL1 PE=1 SV=1	STL1	0.4531	0.00806467	Down	86.329	12.5	6	5	1.97317	1.20986	1.29925	0.634157	0.675894	0.721037		0.486623		chloroplast				GO:0000271 polysaccharide biosynthetic process; GO:0005975 carbohydrate metabolic process; GO:0005976 polysaccharide metabolic process; GO:0006073 cellular glucan metabolic process; GO:0006109 regulation of carbohydrate metabolic process; GO:0008152 metabolic process; GO:0009058 biosynthetic process; GO:0009059 macromolecule biosynthetic process; GO:0009250 glucan biosynthetic process; GO:0009664…	GO:0005618 cell wall; GO:0005622 intracellular; GO:0005623 cell; GO:0005737 cytoplasm; GO:0005768 endosome; GO:0005794 Golgi apparatus; GO:0005802 trans-Golgi network; GO:0012505 endomembrane system; GO:0030312 external encapsulating structure; GO:0031410 cytoplasmic vesicle; GO:0031982 vesicle; GO:0031984 organelle subcompartment; GO:0043226 organelle; GO:0043227 membrane-bounded organelle; GO:0…	GO:0005488 binding; GO:0005515 protein binding; GO:0042802 identical protein binding;
TRINITY_DN3135_c0_g1_m.8617	Casein kinase II subunit alpha-4, chloroplastic OS=Arabidopsis thaliana OX=3702 GN=CKA4 PE=2 SV=1	CKA4	0.6388	0.0249328	Down	49.066	31	10	5	1.3808	1.03763	1.56008	0.804175	0.889656	0.847502	0.600863	1.08723	0.792063	chloroplast	K03097	CSNK2A; casein kinase II subunit alpha [EC:2.7.11.1]	map03008 Ribosome biogenesis in eukaryotes; map04712 Circadian rhythm - plant				PF00069	Protein kinase domain	T	KOG0668	Casein kinase II, alpha subunit
TRINITY_DN31358_c0_g1_m.8616	Miraculin OS=Synsepalum dulcificum OX=3743 PE=1 SV=3	--	0.269	1.06007e-06	Down	24.382	32.6	4	4	1.43195	1.43718	1.4615	0.374489	0.381929	0.408366	1.25212	1.16737	1.08508	chloroplast				GO:0000302 response to reactive oxygen species; GO:0001101 response to acid chemical; GO:0002237 response to molecule of bacterial origin; GO:0002238 response to molecule of fungal origin; GO:0006950 response to stress; GO:0006952 defense response; GO:0006970 response to osmotic stress; GO:0006979 response to oxidative stress; GO:0008219 cell death; GO:0009605 response to external stimulus; GO:00…	GO:0005622 intracellular; GO:0005623 cell; GO:0005737 cytoplasm; GO:0005739 mitochondrion; GO:0043226 organelle; GO:0043227 membrane-bounded organelle; GO:0043229 intracellular organelle; GO:0043231 intracellular membrane-bounded organelle;	GO:0004857 enzyme inhibitor activity; GO:0004866 endopeptidase inhibitor activity; GO:0030234 enzyme regulator activity; GO:0030414 peptidase inhibitor activity; GO:0061134 peptidase regulator activity; GO:0061135 endopeptidase regulator activity; GO:0098772 molecular function regulator;	PF00197	Trypsin and protease inhibitor
TRINITY_DN317_c2_g1_m.8758	NAC domain-containing protein 14 OS=Arabidopsis thaliana OX=3702 GN=NAC014 PE=2 SV=1	NAC014	3.0016	0.0399421	Up	51.925	13.8	4	4		0.472174	0.742853	1.73675	1.91026		0.708607	0.702827	0.72653	nucleus				GO:0006355 regulation of transcription, DNA-templated; GO:0009889 regulation of biosynthetic process; GO:0009891 positive regulation of biosynthetic process; GO:0009893 positive regulation of metabolic process; GO:0010468 regulation of gene expression; GO:0010556 regulation of macromolecule biosynthetic process; GO:0010557 positive regulation of macromolecule biosynthetic process; GO:0010604 posi…	GO:0005622 intracellular; GO:0005623 cell; GO:0005634 nucleus; GO:0005886 plasma membrane; GO:0016020 membrane; GO:0043226 organelle; GO:0043227 membrane-bounded organelle; GO:0043229 intracellular organelle; GO:0043231 intracellular membrane-bounded organelle; GO:0071944 cell periphery;	GO:0003700 DNA-binding transcription factor activity; GO:0140110 transcription regulator activity;
TRINITY_DN3184_c0_g1_m.8772	Protein RCC2 homolog OS=Xenopus laevis OX=8355 GN=rcc2 PE=2 SV=1	rcc2	0.6232	9.13708e-05	Down	58.234	20.7	8	8	1.24241	1.35541	1.34224	0.800814	0.824218	0.830578	0.817274	0.886341	0.90072	nucleus									DZ	KOG1427	Uncharacterized conserved protein, contains RCC1 domain
TRINITY_DN3212_c0_g1_m.8851	Probable aquaporin PIP1-4 OS=Arabidopsis thaliana OX=3702 GN=PIP1.4 PE=1 SV=1	PIP1.4	0.601	1.5649e-06	Down	30.704	30.3	9	7	1.36859	1.40507	1.37158	0.832688	0.818156	0.840333	0.808338	0.785701	0.769542	plasma membrane	K09872	PIP; aquaporin PIP							G	KOG0223	Aquaporin (major intrinsic protein family)
TRINITY_DN3221_c0_g1_m.8900	Transmembrane 9 superfamily member 11 OS=Arabidopsis thaliana OX=3702 GN=TMN11 PE=2 SV=1	TMN11	0.6601	7.93416e-06	Down	74.301	28	14	12	1.44985	1.38766	1.42718	0.938624	0.928694	0.94782	0.633391	0.642447	0.644322	plasma membrane	K17086	TM9SF2_4; transmembrane 9 superfamily member 2/4		GO:0032386 regulation of intracellular transport; GO:0032388 positive regulation of intracellular transport; GO:0032879 regulation of localization; GO:0032880 regulation of protein localization; GO:0033157 regulation of intracellular protein transport; GO:0048518 positive regulation of biological process; GO:0050789 regulation of biological process; GO:0051049 regulation of transport; GO:0051050 …	GO:0005622 intracellular; GO:0005623 cell; GO:0005737 cytoplasm; GO:0005768 endosome; GO:0005769 early endosome; GO:0005794 Golgi apparatus; GO:0005802 trans-Golgi network; GO:0012505 endomembrane system; GO:0016020 membrane; GO:0016021 integral component of membrane; GO:0031224 intrinsic component of membrane; GO:0031410 cytoplasmic vesicle; GO:0031982 vesicle; GO:0031984 organelle subcompartmen…				U	KOG1278	Endosomal membrane proteins, EMP70
TRINITY_DN3224_c0_g1_m.8913	22.7 kDa class IV heat shock protein OS=Pisum sativum OX=3888 GN=HSP22.7 PE=2 SV=1	HSP22.7	2.4083	4.79663e-08	Up	22.124	32.5	6	6	0.558423	0.556385	0.545659	1.34419	1.32756	1.32721	1.13748	1.11591	1.08717	chloroplast	K13993	HSP20; HSP20 family protein	map04141 Protein processing in endoplasmic reticulum						O	KOG0710	Molecular chaperone (small heat-shock protein Hsp26/Hsp42)
TRINITY_DN3229_c0_g1_m.8919	Phospholipid-transporting ATPase 3 OS=Arabidopsis thaliana OX=3702 GN=ALA3 PE=1 SV=2	ALA3	0.5602	0.000773565	Down	69.59	18.8	8	8	1.47652	1.32026	1.46479	0.826481	0.844754	0.716159	0.837483	0.733792	0.779758	plasma membrane	K14802	DRS2, ATP8A; phospholipid-transporting ATPase [EC:7.6.2.1]		GO:0006810 transport; GO:0006811 ion transport; GO:0006820 anion transport; GO:0006869 lipid transport; GO:0006900 vesicle budding from membrane; GO:0006996 organelle organization; GO:0007275 multicellular organism development; GO:0009987 cellular process; GO:0010876 lipid localization; GO:0015711 organic anion transport; GO:0015748 organophosphate ester transport; GO:0015914 phospholipid transpo…	GO:0005622 intracellular; GO:0005623 cell; GO:0005737 cytoplasm; GO:0005768 endosome; GO:0005794 Golgi apparatus; GO:0005802 trans-Golgi network; GO:0005886 plasma membrane; GO:0012505 endomembrane system; GO:0016020 membrane; GO:0031410 cytoplasmic vesicle; GO:0031982 vesicle; GO:0031984 organelle subcompartment; GO:0043226 organelle; GO:0043227 membrane-bounded organelle; GO:0043229 intracellul…	GO:0003824 catalytic activity; GO:0005215 transporter activity; GO:0005319 lipid transporter activity; GO:0005548 phospholipid transporter activity; GO:0016462 pyrophosphatase activity; GO:0016787 hydrolase activity; GO:0016817 hydrolase activity, acting on acid anhydrides; GO:0016818 hydrolase activity, acting on acid anhydrides, in phosphorus-containing anhydrides; GO:0016887 ATPase activity; G…			P	KOG0206	P-type ATPase
TRINITY_DN324_c0_g1_m.8977	Basic secretory protease (Fragments) OS=Boswellia serrata OX=613112 PE=1 SV=1	--	1.5374	0.000579121	Up	25.414	30.8	7	7	0.570567	0.600554	0.555191	0.948472	0.866288	0.839345	1.57212	1.51717	1.53029	extracellular
TRINITY_DN3240_c2_g1_m.8946	Cytochrome P450 84A1 OS=Arabidopsis thaliana OX=3702 GN=CYP84A1 PE=1 SV=1	CYP84A1	0.3958	1.53967e-06	Down	61.347	25.1	9	9	1.65406	1.62345	1.55377	0.64816	0.637085	0.626984	0.733635	0.777269	0.745582	chloroplast	K09755	CYP84A, F5H; ferulate-5-hydroxylase [EC:1.14.-.-]	map00940 Phenylpropanoid biosynthesis; map01100 Metabolic pathways; map01110 Biosynthesis of secondary metabolites	GO:0006725 cellular aromatic compound metabolic process; GO:0008152 metabolic process; GO:0009058 biosynthetic process; GO:0009314 response to radiation; GO:0009411 response to UV; GO:0009416 response to light stimulus; GO:0009628 response to abiotic stimulus; GO:0009698 phenylpropanoid metabolic process; GO:0009699 phenylpropanoid biosynthetic process; GO:0009808 lignin metabolic process; GO:000…	GO:0005622 intracellular; GO:0005623 cell; GO:0005737 cytoplasm; GO:0005783 endoplasmic reticulum; GO:0012505 endomembrane system; GO:0016020 membrane; GO:0043226 organelle; GO:0043227 membrane-bounded organelle; GO:0043229 intracellular organelle; GO:0043231 intracellular membrane-bounded organelle;	GO:0003824 catalytic activity; GO:0004497 monooxygenase activity; GO:0016491 oxidoreductase activity; GO:0016705 oxidoreductase activity, acting on paired donors, with incorporation or reduction of molecular oxygen; GO:0016709 oxidoreductase activity, acting on paired donors, with incorporation or reduction of molecular oxygen, NAD(P)H as one donor, and incorporation of one atom of oxygen;	PF00067	Cytochrome P450	Q	KOG0156	Cytochrome P450 CYP2 subfamily
TRINITY_DN3246_c0_g1_m.8967	D-3-phosphoglycerate dehydrogenase 2, chloroplastic OS=Arabidopsis thaliana OX=3702 GN=PGDH2 PE=1 SV=2	PGDH2	0.1075	2.03493e-05	Down	66.741	35.4	15	13	2.51568	2.81727	2.57549	0.330285	0.277961	0.242051	0.071816	0.096185	0.073266	chloroplast	K00058	serA, PHGDH; D-3-phosphoglycerate dehydrogenase / 2-oxoglutarate reductase [EC:1.1.1.95 1.1.1.399]	map00260 Glycine, serine and threonine metabolism; map00270 Cysteine and methionine metabolism; map01100 Metabolic pathways; map01200 Carbon metabolism; map01230 Biosynthesis of amino acids		GO:0005622 intracellular; GO:0005623 cell; GO:0005634 nucleus; GO:0005737 cytoplasm; GO:0005829 cytosol; GO:0009507 chloroplast; GO:0009532 plastid stroma; GO:0009536 plastid; GO:0009570 chloroplast stroma; GO:0043226 organelle; GO:0043227 membrane-bounded organelle; GO:0043229 intracellular organelle; GO:0043231 intracellular membrane-bounded organelle;		PF00389; PF02826; PF01842	D-isomer specific 2-hydroxyacid dehydrogenase, catalytic domain; D-isomer specific 2-hydroxyacid dehydrogenase, NAD binding domain; ACT domain	E	KOG0068	D-3-phosphoglycerate dehydrogenase, D-isomer-specific 2-hydroxy acid dehydrogenase superfamily
TRINITY_DN325_c0_g1_m.9029	Alpha-amylase/subtilisin inhibitor OS=Oryza sativa subsp. japonica OX=39947 GN=RASI PE=1 SV=2	RASI	0.4133	0.0227479	Down	22.693	26.9	4	4	1.09824	1.86459	1.91017	0.538508	0.56858	0.906832	0.702782	0.626377	0.783924	extracellular				GO:0009892 negative regulation of metabolic process; GO:0010466 negative regulation of peptidase activity; GO:0010605 negative regulation of macromolecule metabolic process; GO:0010951 negative regulation of endopeptidase activity; GO:0019222 regulation of metabolic process; GO:0030162 regulation of proteolysis; GO:0031323 regulation of cellular metabolic process; GO:0031324 negative regulation o…		GO:0004857 enzyme inhibitor activity; GO:0004866 endopeptidase inhibitor activity; GO:0004867 serine-type endopeptidase inhibitor activity; GO:0015066 alpha-amylase inhibitor activity; GO:0030234 enzyme regulator activity; GO:0030414 peptidase inhibitor activity; GO:0061134 peptidase regulator activity; GO:0061135 endopeptidase regulator activity; GO:0098772 molecular function regulator;	PF00197	Trypsin and protease inhibitor
TRINITY_DN3256_c1_g1_m.9002	Probable 1-deoxy-D-xylulose-5-phosphate synthase 2, chloroplastic OS=Oryza sativa subsp. japonica OX=39947 GN=Os07g0190000 PE=2 SV=1	Os07g0190000	0.5578	5.11518e-05	Down	82.071	31.6	15	15	1.33351	1.37861	1.44256	0.800917	0.774427	0.742179	0.806315	0.83113	0.890352	chloroplast	K01662	dxs; 1-deoxy-D-xylulose-5-phosphate synthase [EC:2.2.1.7]	map00730 Thiamine metabolism; map00900 Terpenoid backbone biosynthesis; map01100 Metabolic pathways; map01110 Biosynthesis of secondary metabolites				PF02779; PF02780	Transketolase, pyrimidine binding domain; Transketolase, C-terminal domain	G	KOG0523	Transketolase
TRINITY_DN3260_c0_g1_m.9034	Flavin-containing monooxygenase FMO GS-OX-like 3 OS=Arabidopsis thaliana OX=3702 GN=At1g62620 PE=2 SV=2	At1g62620	1.9027	0.000461383	Up	50.75	26.5	9	9	0.531314	0.508473	0.62246	1.04839	1.05492	1.05937	1.47171	1.3512	1.35216	cytoplasm	K22324	GS-OX; aliphatic glucosinolate S-oxygenase [EC:1.14.13.237]		GO:0008152 metabolic process; GO:0055114 oxidation-reduction process;		GO:0003824 catalytic activity; GO:0004497 monooxygenase activity; GO:0016491 oxidoreductase activity;			Q	KOG1399	Flavin-containing monooxygenase
TRINITY_DN3268_c0_g1_m.9067	uncharacterized protein LOC21398933 [Morus notabilis]	--	0.515	0.0239248	Down	20.079	5	1	1	1.0376	1.33857	1.55014	0.695328	0.652611		0.928126	0.922724	0.874905	chloroplast
TRINITY_DN3273_c0_g1_m.9090	Cellulose synthase A catalytic subunit 4 [UDP-forming] OS=Arabidopsis thaliana OX=3702 GN=CESA4 PE=1 SV=1	CESA4	0.2146	0.00157805	Down	121.44	12.2	9	8	1.48815	1.29677	1.58919	0.264467		0.361421				plasma membrane	K10999	CESA; cellulose synthase A [EC:2.4.1.12]		GO:0000271 polysaccharide biosynthetic process; GO:0000278 mitotic cell cycle; GO:0000281 mitotic cytokinesis; GO:0000910 cytokinesis; GO:0005975 carbohydrate metabolic process; GO:0005976 polysaccharide metabolic process; GO:0006073 cellular glucan metabolic process; GO:0006950 response to stress; GO:0006952 defense response; GO:0007049 cell cycle; GO:0008152 metabolic process; GO:0009058 biosyn…	GO:0005622 intracellular; GO:0005623 cell; GO:0005737 cytoplasm; GO:0005794 Golgi apparatus; GO:0005886 plasma membrane; GO:0012505 endomembrane system; GO:0016020 membrane; GO:0043226 organelle; GO:0043227 membrane-bounded organelle; GO:0043229 intracellular organelle; GO:0043231 intracellular membrane-bounded organelle; GO:0071944 cell periphery;	GO:0003824 catalytic activity; GO:0016740 transferase activity; GO:0016757 transferase activity, transferring glycosyl groups; GO:0016758 transferase activity, transferring hexosyl groups; GO:0016759 cellulose synthase activity; GO:0046527 glucosyltransferase activity;
TRINITY_DN3281_c0_g1_m.9127	Transmembrane 9 superfamily member 2 OS=Arabidopsis thaliana OX=3702 GN=TMN2 PE=2 SV=1	TMN2	0.6263	0.00040354	Down	70.406	20.9	12	9	1.30455	1.34996	1.39828	0.899906	0.788868	0.849561	0.863686	0.752439	0.792749	plasma membrane				GO:0002790 peptide secretion; GO:0006810 transport; GO:0006897 endocytosis; GO:0006909 phagocytosis; GO:0007154 cell communication; GO:0007155 cell adhesion; GO:0007165 signal transduction; GO:0008104 protein localization; GO:0008283 cell population proliferation; GO:0009306 protein secretion; GO:0009987 cellular process; GO:0015031 protein transport; GO:0015833 peptide transport; GO:0016192 vesi…	GO:0005623 cell; GO:0005886 plasma membrane; GO:0005887 integral component of plasma membrane; GO:0016020 membrane; GO:0016021 integral component of membrane; GO:0031224 intrinsic component of membrane; GO:0031226 intrinsic component of plasma membrane; GO:0071944 cell periphery;	GO:0004888 transmembrane signaling receptor activity; GO:0038023 signaling receptor activity; GO:0060089 molecular transducer activity;			U	KOG1278	Endosomal membrane proteins, EMP70
TRINITY_DN3289_c0_g1_m.9135	Probable aldo-keto reductase 4 OS=Arabidopsis thaliana OX=3702 GN=At1g60710 PE=2 SV=1	At1g60710	4.3222	5.69411e-05	Up	22.204	60	9	9	0.276094	0.2798	0.354209	1.27648	1.33266	1.3245	1.46801	1.34018	1.34806	cytoplasm							PF00248	Aldo/keto reductase family	C	KOG1575	Voltage-gated shaker-like K+ channel, subunit beta/KCNAB
TRINITY_DN3289_c0_g2_m.9136	CBS domain-containing protein CBSX6 OS=Arabidopsis thaliana OX=3702 GN=CBSX6 PE=1 SV=1	CBSX6	0.1504	3.72262e-05	Down	45.595	10.4	3	3	1.93893	1.89199	2.44466	0.303546	0.295168	0.345008		0.421459	0.359242	cytoplasm					GO:0005622 intracellular; GO:0005623 cell; GO:0005737 cytoplasm; GO:0005773 vacuole; GO:0043226 organelle; GO:0043227 membrane-bounded organelle; GO:0043229 intracellular organelle; GO:0043231 intracellular membrane-bounded organelle;		PF00571	CBS domain	C	KOG1764	5'-AMP-activated protein kinase, gamma subunit
TRINITY_DN33_c0_g1_m.9411	Serine carboxypeptidase-like 18 OS=Arabidopsis thaliana OX=3702 GN=SCPL18 PE=2 SV=2	SCPL18	2.0386	0.0360616	Up	27.55	11.8	2	2	0.577467	0.685842		1.536	1.36471	0.962445		0.994915	0.878619	chloroplast	K16296	SCPL-I; serine carboxypeptidase-like clade I [EC:3.4.16.-]		GO:0008152 metabolic process; GO:0019748 secondary metabolic process;	GO:0005618 cell wall; GO:0005623 cell; GO:0009505 plant-type cell wall; GO:0030312 external encapsulating structure; GO:0071944 cell periphery;	GO:0003824 catalytic activity; GO:0016740 transferase activity; GO:0016746 transferase activity, transferring acyl groups; GO:0016747 transferase activity, transferring acyl groups other than amino-acyl groups;	PF00450	Serine carboxypeptidase	EO	KOG1282	Serine carboxypeptidases (lysosomal cathepsin A)
TRINITY_DN33045_c0_g1_m.9174	F-box protein At5g07610 OS=Arabidopsis thaliana OX=3702 GN=At5g07610 PE=2 SV=1	At5g07610	1.6244	0.000369763	Up	41.475	13.7	3	3	0.559305	0.560182	0.545158	0.868807	0.856151	0.979102	1.38443	1.60012	1.64674	cytoplasm
TRINITY_DN33148_c0_g1_m.9201	Choline transporter protein 1 OS=Arabidopsis thaliana OX=3702 GN=CHER1 PE=1 SV=1	CHER1	0.6558	0.00680361	Down	79.012	10.1	5	5	1.41266	1.48772	1.372	0.809985	0.923921	1.06787	0.676926	0.647768	0.601151	plasma membrane	K15377	SLC44A2_4_5; solute carrier family 44 (choline transporter-like protein), member 2/4/5		GO:0000003 reproduction; GO:0001558 regulation of cell growth; GO:0003002 regionalization; GO:0003006 developmental process involved in reproduction; GO:0006810 transport; GO:0006811 ion transport; GO:0006812 cation transport; GO:0006836 neurotransmitter transport; GO:0007275 multicellular organism development; GO:0007389 pattern specification process; GO:0008104 protein localization; GO:0009663 …	GO:0000139 Golgi membrane; GO:0000325 plant-type vacuole; GO:0005618 cell wall; GO:0005622 intracellular; GO:0005623 cell; GO:0005737 cytoplasm; GO:0005768 endosome; GO:0005769 early endosome; GO:0005773 vacuole; GO:0005774 vacuolar membrane; GO:0005794 Golgi apparatus; GO:0005802 trans-Golgi network; GO:0005886 plasma membrane; GO:0005911 cell-cell junction; GO:0009505 plant-type cell wall; GO:0…	GO:0005215 transporter activity; GO:0005326 neurotransmitter transmembrane transporter activity; GO:0008324 cation transmembrane transporter activity; GO:0008519 ammonium transmembrane transporter activity; GO:0015075 ion transmembrane transporter activity; GO:0015101 organic cation transmembrane transporter activity; GO:0015220 choline transmembrane transporter activity; GO:0022857 transmembrane…			I	KOG1362	Choline transporter-like protein
TRINITY_DN333_c1_g2_m.9271	Universal stress protein PHOS34 OS=Arabidopsis thaliana OX=3702 GN=PHOS34 PE=1 SV=1	PHOS34	1.6565	0.00114906	Up	14.865	33.1	3	3	0.761675	0.703333	0.672613	1.07734	1.19033	1.27336	1.14121	1.22542	0.954725	cytoplasm							PF00582	Universal stress protein family
TRINITY_DN3386_c0_g1_m.9377	Chalcone synthase 1 OS=Ruta graveolens OX=37565 GN=CHS1 PE=2 SV=1	CHS1	2.6883	0.000780437	Up	12.954	55.3	5	4	0.350936	0.366294	0.33192	1.14136	0.828461	0.850616	1.72005	1.67315	1.73721	extracellular	K00660	CHS; chalcone synthase [EC:2.3.1.74]	map00941 Flavonoid biosynthesis; map01100 Metabolic pathways; map01110 Biosynthesis of secondary metabolites; map04712 Circadian rhythm - plant				PF00195	Chalcone and stilbene synthases, N-terminal domain
TRINITY_DN3393_c0_g1_m.9396	Naringenin,2-oxoglutarate 3-dioxygenase (Fragment) OS=Petunia hybrida OX=4102 GN=AN3 PE=1 SV=1	AN3	0.6465	2.98207e-05	Down	41.184	50.4	12	12	1.0886	1.05342	1.06367	0.676891	0.716248	0.679462	1.21363	1.28206	1.22603	cytoplasm	K00475	F3H; naringenin 3-dioxygenase [EC:1.14.11.9]	map00941 Flavonoid biosynthesis; map01100 Metabolic pathways; map01110 Biosynthesis of secondary metabolites	GO:0008152 metabolic process; GO:0009058 biosynthetic process; GO:0009314 response to radiation; GO:0009411 response to UV; GO:0009416 response to light stimulus; GO:0009628 response to abiotic stimulus; GO:0009812 flavonoid metabolic process; GO:0009813 flavonoid biosynthetic process; GO:0010224 response to UV-B; GO:0050896 response to stimulus; GO:0055114 oxidation-reduction process; GO:0071704…		GO:0003824 catalytic activity; GO:0016491 oxidoreductase activity; GO:0016705 oxidoreductase activity, acting on paired donors, with incorporation or reduction of molecular oxygen; GO:0016706 2-oxoglutarate-dependent dioxygenase activity; GO:0045486 naringenin 3-dioxygenase activity; GO:0051213 dioxygenase activity;	PF03171	2OG-Fe(II) oxygenase superfamily	Q	KOG0143	Iron/ascorbate family oxidoreductases
TRINITY_DN3394_c0_g1_m.9397	Serine acetyltransferase 3, mitochondrial OS=Arabidopsis thaliana OX=3702 GN=SAT3 PE=1 SV=3	SAT3	0.6513	0.0321193	Down	51.072	12.5	4	3	1.27814	1.74809	1.17409	0.931753	0.968515	0.835601	0.587235	0.811104	0.665473	chloroplast	K00640	cysE; serine O-acetyltransferase [EC:2.3.1.30]	map00270 Cysteine and methionine metabolism; map00920 Sulfur metabolism; map01100 Metabolic pathways; map01110 Biosynthesis of secondary metabolites; map01200 Carbon metabolism; map01230 Biosynthesis of amino acids	GO:0000096 sulfur amino acid metabolic process; GO:0000097 sulfur amino acid biosynthetic process; GO:0006082 organic acid metabolic process; GO:0006520 cellular amino acid metabolic process; GO:0006534 cysteine metabolic process; GO:0006790 sulfur compound metabolic process; GO:0006807 nitrogen compound metabolic process; GO:0008152 metabolic process; GO:0008652 cellular amino acid biosynthetic …	GO:0005622 intracellular; GO:0005623 cell; GO:0005737 cytoplasm; GO:0005739 mitochondrion; GO:0005829 cytosol; GO:0043226 organelle; GO:0043227 membrane-bounded organelle; GO:0043229 intracellular organelle; GO:0043231 intracellular membrane-bounded organelle;	GO:0003824 catalytic activity; GO:0005488 binding; GO:0008270 zinc ion binding; GO:0008374 O-acyltransferase activity; GO:0009001 serine O-acetyltransferase activity; GO:0016407 acetyltransferase activity; GO:0016412 serine O-acyltransferase activity; GO:0016413 O-acetyltransferase activity; GO:0016740 transferase activity; GO:0016746 transferase activity, transferring acyl groups; GO:0016747 tra…	PF06426	Serine acetyltransferase, N-terminal	E	KOG4750	Serine O-acetyltransferase
TRINITY_DN34_c0_g2_m.9639	Cinnamoyl-CoA reductase 1 OS=Arabidopsis thaliana OX=3702 GN=CCR1 PE=1 SV=1	CCR1	1.5591	3.15054e-05	Up	35.753	58.8	17	11	0.628298	0.664165	0.65799	1.0192	0.989192	1.03253	1.38647	1.31035	1.3118	chloroplast									V	KOG1502	Flavonol reductase/cinnamoyl-CoA reductase
TRINITY_DN34_c0_g3_m.9641	Cinnamoyl-CoA reductase 1 OS=Arabidopsis thaliana OX=3702 GN=CCR1 PE=1 SV=1	CCR1	2.9274	5.24567e-06	Up	35.851	53.7	13	9	0.408953	0.421364	0.454337	1.27919	1.23948	1.24208	1.36089	1.32285	1.27087	chloroplast									V	KOG1502	Flavonol reductase/cinnamoyl-CoA reductase
TRINITY_DN3409_c0_g1_m.9429	Endoplasmic reticulum oxidoreductin-1 OS=Arabidopsis thaliana OX=3702 GN=AERO1 PE=1 SV=1	AERO1	0.6251	0.000925706	Down	54.56	38.6	13	13	1.4655	1.50167	1.50122	0.874715	1.03232	0.886152	0.560163	0.580807	0.597459	vacuolar membrane	K10950	ERO1L; ERO1-like protein alpha [EC:1.8.4.-]	map04141 Protein processing in endoplasmic reticulum	GO:0006457 protein folding; GO:0006464 cellular protein modification process; GO:0006807 nitrogen compound metabolic process; GO:0008152 metabolic process; GO:0009987 cellular process; GO:0019538 protein metabolic process; GO:0034975 protein folding in endoplasmic reticulum; GO:0036211 protein modification process; GO:0043170 macromolecule metabolic process; GO:0043412 macromolecule modification;…	GO:0005622 intracellular; GO:0005623 cell; GO:0005737 cytoplasm; GO:0005783 endoplasmic reticulum; GO:0005789 endoplasmic reticulum membrane; GO:0012505 endomembrane system; GO:0016020 membrane; GO:0031984 organelle subcompartment; GO:0042175 nuclear outer membrane-endoplasmic reticulum membrane network; GO:0043226 organelle; GO:0043227 membrane-bounded organelle; GO:0043229 intracellular organel…	GO:0003756 protein disulfide isomerase activity; GO:0003824 catalytic activity; GO:0015035 protein disulfide oxidoreductase activity; GO:0015036 disulfide oxidoreductase activity; GO:0016491 oxidoreductase activity; GO:0016667 oxidoreductase activity, acting on a sulfur group of donors; GO:0016853 isomerase activity; GO:0016860 intramolecular oxidoreductase activity; GO:0016864 intramolecular oxi…			OU	KOG2608	Endoplasmic reticulum membrane-associated oxidoreductin involved in disulfide bond formation
TRINITY_DN341_c0_g1_m.9449	Chloroplast envelope quinone oxidoreductase homolog OS=Arabidopsis thaliana OX=3702 GN=CEQORH PE=1 SV=1	CEQORH	2.1379	0.0130751	Up	35.122	20.6	3	3	0.525604	0.977866	0.757065	1.73253	1.48795	1.61226	0.687855	0.55626	0.662609	chloroplast	K00224	CEQORH; chloroplastic oxoene reductase [EC:1.3.1.-]	map00592 alpha-Linolenic acid metabolism; map01110 Biosynthesis of secondary metabolites		GO:0005622 intracellular; GO:0005623 cell; GO:0005737 cytoplasm; GO:0005773 vacuole; GO:0005886 plasma membrane; GO:0009507 chloroplast; GO:0009526 plastid envelope; GO:0009534 chloroplast thylakoid; GO:0009535 chloroplast thylakoid membrane; GO:0009536 plastid; GO:0009579 thylakoid; GO:0009941 chloroplast envelope; GO:0016020 membrane; GO:0031967 organelle envelope; GO:0031975 envelope; GO:00319…		PF08240; PF13602	Alcohol dehydrogenase GroES-like domain; Zinc-binding dehydrogenase	C	KOG1198	Zinc-binding oxidoreductase
TRINITY_DN3414_c0_g1_m.9437	Probable xyloglucan endotransglucosylase/hydrolase protein B OS=Phaseolus angularis OX=3914 GN=XTHB PE=2 SV=1	XTHB	0.5959	8.1761e-07	Down	34.574	46.8	12	11	1.56006	1.60335	1.59921	0.949083	0.937155	0.951887	0.465213	0.474694	0.459349	vacuolar membrane	K08235	E2.4.1.207; xyloglucan:xyloglucosyl transferase [EC:2.4.1.207]		GO:0000902 cell morphogenesis; GO:0009314 response to radiation; GO:0009416 response to light stimulus; GO:0009605 response to external stimulus; GO:0009612 response to mechanical stimulus; GO:0009628 response to abiotic stimulus; GO:0009642 response to light intensity; GO:0009645 response to low light intensity stimulus; GO:0009653 anatomical structure morphogenesis; GO:0009719 response to endog…	GO:0005576 extracellular region; GO:0005618 cell wall; GO:0005622 intracellular; GO:0005623 cell; GO:0005737 cytoplasm; GO:0005911 cell-cell junction; GO:0009505 plant-type cell wall; GO:0009506 plasmodesma; GO:0009507 chloroplast; GO:0009536 plastid; GO:0016020 membrane; GO:0030054 cell junction; GO:0030312 external encapsulating structure; GO:0043226 organelle; GO:0043227 membrane-bounded organ…	GO:0003824 catalytic activity; GO:0016740 transferase activity; GO:0016757 transferase activity, transferring glycosyl groups; GO:0016758 transferase activity, transferring hexosyl groups; GO:0016762 xyloglucan:xyloglucosyl transferase activity; GO:0046527 glucosyltransferase activity;	PF00722	Glycosyl hydrolases family 16
TRINITY_DN345_c0_g2_m.9538	Non-classical arabinogalactan protein 30 OS=Arabidopsis thaliana OX=3702 GN=AGP30 PE=2 SV=1	AGP30	0.6494	1.62082e-05	Down	27.636	37.2	13	13	1.40685	1.36617	1.41936	0.930888	0.900774	0.890759	0.677605	0.70635	0.701232	chloroplast				GO:0000003 reproduction; GO:0003008 system process; GO:0007155 cell adhesion; GO:0007338 single fertilization; GO:0007339 binding of sperm to zona pellucida; GO:0007600 sensory perception; GO:0007605 sensory perception of sound; GO:0008037 cell recognition; GO:0009566 fertilization; GO:0009987 cellular process; GO:0009988 cell-cell recognition; GO:0019953 sexual reproduction; GO:0022414 reproduct…	GO:0005576 extracellular region; GO:0005623 cell; GO:0005886 plasma membrane; GO:0016020 membrane; GO:0031012 extracellular matrix; GO:0071944 cell periphery;	GO:0005198 structural molecule activity; GO:0005201 extracellular matrix structural constituent; GO:0005488 binding; GO:0050840 extracellular matrix binding;			S	KOG1216	von Willebrand factor and related coagulation proteins
TRINITY_DN34569_c0_g1_m.9525	ATP sulfurylase 2 OS=Arabidopsis thaliana OX=3702 GN=APS2 PE=1 SV=1	APS2	0.5183	0.00482811	Down	54.108	24.9	9	8	1.64509	1.5089	1.51971	0.809629	0.964822	0.648001	0.590589	0.616157	0.697098	chloroplast	K13811	PAPSS; 3'-phosphoadenosine 5'-phosphosulfate synthase [EC:2.7.7.4 2.7.1.25]	map00230 Purine metabolism; map00261 Monobactam biosynthesis; map00450 Selenocompound metabolism; map00920 Sulfur metabolism; map01100 Metabolic pathways	GO:0000103 sulfate assimilation; GO:0001887 selenium compound metabolic process; GO:0006790 sulfur compound metabolic process; GO:0006793 phosphorus metabolic process; GO:0006796 phosphate-containing compound metabolic process; GO:0006950 response to stress; GO:0007154 cell communication; GO:0008152 metabolic process; GO:0009267 cellular response to starvation; GO:0009605 response to external sti…	GO:0005622 intracellular; GO:0005623 cell; GO:0005737 cytoplasm; GO:0005829 cytosol; GO:0005886 plasma membrane; GO:0009507 chloroplast; GO:0009532 plastid stroma; GO:0009536 plastid; GO:0009570 chloroplast stroma; GO:0016020 membrane; GO:0043226 organelle; GO:0043227 membrane-bounded organelle; GO:0043229 intracellular organelle; GO:0043231 intracellular membrane-bounded organelle; GO:0071944 ce…	GO:0003824 catalytic activity; GO:0004020 adenylylsulfate kinase activity; GO:0004779 sulfate adenylyltransferase activity; GO:0004781 sulfate adenylyltransferase (ATP) activity; GO:0016301 kinase activity; GO:0016740 transferase activity; GO:0016772 transferase activity, transferring phosphorus-containing groups; GO:0016773 phosphotransferase activity, alcohol group as acceptor; GO:0016779 nucle…	PF14306; PF01747	PUA-like domain; ATP-sulfurylase	P	KOG0636	ATP sulfurylase (sulfate adenylyltransferase)
TRINITY_DN3462_c0_g1_m.9546	Xaa-Pro dipeptidase OS=Homo sapiens OX=9606 GN=PEPD PE=1 SV=3	PEPD	1.8828	4.96503e-06	Up	56.97	43.2	14	14	0.632863	0.649666	0.629498	1.16148	1.21297	1.22548	1.15314	1.16788	1.16702	chloroplast	K14213	PEPD; Xaa-Pro dipeptidase [EC:3.4.13.9]		GO:0006082 organic acid metabolic process; GO:0006508 proteolysis; GO:0006520 cellular amino acid metabolic process; GO:0006807 nitrogen compound metabolic process; GO:0008152 metabolic process; GO:0009987 cellular process; GO:0019538 protein metabolic process; GO:0019752 carboxylic acid metabolic process; GO:0043170 macromolecule metabolic process; GO:0043436 oxoacid metabolic process; GO:004423…	GO:0005622 intracellular; GO:0005623 cell; GO:0005634 nucleus; GO:0005654 nucleoplasm; GO:0031974 membrane-enclosed lumen; GO:0031981 nuclear lumen; GO:0043226 organelle; GO:0043227 membrane-bounded organelle; GO:0043229 intracellular organelle; GO:0043231 intracellular membrane-bounded organelle; GO:0043233 organelle lumen; GO:0070013 intracellular organelle lumen;	GO:0003824 catalytic activity; GO:0004180 carboxypeptidase activity; GO:0004181 metallocarboxypeptidase activity; GO:0008233 peptidase activity; GO:0008235 metalloexopeptidase activity; GO:0008237 metallopeptidase activity; GO:0008238 exopeptidase activity; GO:0016787 hydrolase activity; GO:0070011 peptidase activity, acting on L-amino acid peptides; GO:0140096 catalytic activity, acting on a pro…	PF05195; PF00557	Aminopeptidase P, N-terminal domain; Metallopeptidase family M24	E	KOG2737	Putative metallopeptidase
TRINITY_DN3480_c0_g1_m.9591	Malate dehydrogenase, cytoplasmic OS=Zea mays OX=4577 PE=1 SV=2	--	1.7221	0.000301753	Up	35.698	50.6	14	8	0.675704	0.692584	0.601249	1.15694	1.09613	1.13873	1.22721	1.23885	1.1726	chloroplast	K00025	MDH1; malate dehydrogenase [EC:1.1.1.37]	map00020 Citrate cycle (TCA cycle); map00270 Cysteine and methionine metabolism; map00620 Pyruvate metabolism; map00630 Glyoxylate and dicarboxylate metabolism; map00710 Carbon fixation in photosynthetic organisms; map01100 Metabolic pathways; map01110 Biosynthesis of secondary metabolites; map01200 Carbon metabolism	GO:0006082 organic acid metabolic process; GO:0006091 generation of precursor metabolites and energy; GO:0006099 tricarboxylic acid cycle; GO:0006101 citrate metabolic process; GO:0006107 oxaloacetate metabolic process; GO:0006108 malate metabolic process; GO:0006139 nucleobase-containing compound metabolic process; GO:0006725 cellular aromatic compound metabolic process; GO:0006732 coenzyme meta…	GO:0005622 intracellular; GO:0005623 cell; GO:0005737 cytoplasm; GO:0016020 membrane;	GO:0003824 catalytic activity; GO:0016491 oxidoreductase activity; GO:0016614 oxidoreductase activity, acting on CH-OH group of donors; GO:0016615 malate dehydrogenase activity; GO:0016616 oxidoreductase activity, acting on the CH-OH group of donors, NAD or NADP as acceptor; GO:0030060 L-malate dehydrogenase activity;	PF02866	lactate/malate dehydrogenase, alpha/beta C-terminal domain	C	KOG1496	Malate dehydrogenase
TRINITY_DN3487_c0_g1_m.9612	Glucan endo-1,3-beta-glucosidase OS=Vitis vinifera OX=29760 GN=VIT_06s0061g00120 PE=1 SV=2	VIT_06s0061g00120	3.8245	0.00017466	Up	36.863	36.1	7	7	0.282976	0.207408	0.212976	0.882417	0.889456	0.918101	2.00515	1.74677	1.85474	chloroplast				GO:0000272 polysaccharide catabolic process; GO:0005975 carbohydrate metabolic process; GO:0005976 polysaccharide metabolic process; GO:0006073 cellular glucan metabolic process; GO:0006074 (1->3)-beta-D-glucan metabolic process; GO:0006076 (1->3)-beta-D-glucan catabolic process; GO:0006950 response to stress; GO:0006952 defense response; GO:0008152 metabolic process; GO:0009056 catabolic process…	GO:0005576 extracellular region; GO:0005623 cell; GO:0005886 plasma membrane; GO:0016020 membrane; GO:0031224 intrinsic component of membrane; GO:0031225 anchored component of membrane; GO:0031226 intrinsic component of plasma membrane; GO:0046658 anchored component of plasma membrane; GO:0048046 apoplast; GO:0071944 cell periphery;	GO:0003824 catalytic activity; GO:0004553 hydrolase activity, hydrolyzing O-glycosyl compounds; GO:0005488 binding; GO:0008422 beta-glucosidase activity; GO:0015926 glucosidase activity; GO:0016787 hydrolase activity; GO:0016798 hydrolase activity, acting on glycosyl bonds; GO:0030246 carbohydrate binding; GO:0030247 polysaccharide binding; GO:0042973 glucan endo-1,3-beta-D-glucosidase activity;	PF00332	Glycosyl hydrolases family 17
TRINITY_DN3490_c1_g1_m.9616	Homoserine kinase OS=Arabidopsis thaliana OX=3702 GN=HSK PE=1 SV=1	HSK	0.5851	7.5443e-07	Down	43.603	40.8	14	14	1.24555	1.2646	1.25096	0.745009	0.722053	0.733617	1.03199	1.00472	1.0015	mitochondria	K00872	thrB1; homoserine kinase [EC:2.7.1.39]	map00260 Glycine, serine and threonine metabolism; map01100 Metabolic pathways; map01110 Biosynthesis of secondary metabolites; map01230 Biosynthesis of amino acids	GO:0000096 sulfur amino acid metabolic process; GO:0000097 sulfur amino acid biosynthetic process; GO:0006082 organic acid metabolic process; GO:0006520 cellular amino acid metabolic process; GO:0006555 methionine metabolic process; GO:0006566 threonine metabolic process; GO:0006790 sulfur compound metabolic process; GO:0006793 phosphorus metabolic process; GO:0006796 phosphate-containing compoun…	GO:0005622 intracellular; GO:0005623 cell; GO:0005737 cytoplasm; GO:0009507 chloroplast; GO:0009532 plastid stroma; GO:0009536 plastid; GO:0009570 chloroplast stroma; GO:0043226 organelle; GO:0043227 membrane-bounded organelle; GO:0043229 intracellular organelle; GO:0043231 intracellular membrane-bounded organelle;	GO:0003824 catalytic activity; GO:0004413 homoserine kinase activity; GO:0016301 kinase activity; GO:0016740 transferase activity; GO:0016772 transferase activity, transferring phosphorus-containing groups; GO:0016773 phosphotransferase activity, alcohol group as acceptor; GO:0019202 amino acid kinase activity;			E	KOG1537	Homoserine kinase
TRINITY_DN3492_c0_g1_m.9619	Fatty-acid and retinol-binding protein 1 OS=Onchocerca gutturosa OX=6283 GN=far-1 PE=1 SV=2	far-1	0.31	4.14232e-06	Down	23.103	32.5	6	6	1.36167	1.3563	1.29844	0.397077	0.439428	0.408398	1.32716	1.1927	1.21884	endoplasmic reticulum					GO:0005576 extracellular region;	GO:0005488 binding; GO:0005501 retinoid binding; GO:0005504 fatty acid binding; GO:0008289 lipid binding; GO:0019840 isoprenoid binding; GO:0019841 retinol binding; GO:0019842 vitamin binding; GO:0031406 carboxylic acid binding; GO:0033293 monocarboxylic acid binding; GO:0036094 small molecule binding; GO:0043167 ion binding; GO:0043168 anion binding; GO:0043177 organic acid binding; GO:0043178 a…
TRINITY_DN35047_c0_g1_m.9652	Guanine nucleotide-binding protein-like NSN1 OS=Arabidopsis thaliana OX=3702 GN=NSN1 PE=1 SV=1	NSN1	0.6284	0.0395445	Down	69.338	5.2	2	2		1.21109	1.70663	0.900323	0.913861	0.936134		0.593333	0.738621	chloroplast	K14538	NUG1, GNL3; nuclear GTP-binding protein	map03008 Ribosome biogenesis in eukaryotes	GO:0000003 reproduction; GO:0003006 developmental process involved in reproduction; GO:0006355 regulation of transcription, DNA-templated; GO:0007275 multicellular organism development; GO:0009653 anatomical structure morphogenesis; GO:0009790 embryo development; GO:0009791 post-embryonic development; GO:0009793 embryo development ending in seed dormancy; GO:0009888 tissue development; GO:0009889…	GO:0005622 intracellular; GO:0005623 cell; GO:0005634 nucleus; GO:0005730 nucleolus; GO:0005911 cell-cell junction; GO:0009506 plasmodesma; GO:0030054 cell junction; GO:0031974 membrane-enclosed lumen; GO:0031981 nuclear lumen; GO:0043226 organelle; GO:0043227 membrane-bounded organelle; GO:0043228 non-membrane-bounded organelle; GO:0043229 intracellular organelle; GO:0043231 intracellular membra…	GO:0003824 catalytic activity; GO:0003924 GTPase activity; GO:0016462 pyrophosphatase activity; GO:0016787 hydrolase activity; GO:0016817 hydrolase activity, acting on acid anhydrides; GO:0016818 hydrolase activity, acting on acid anhydrides, in phosphorus-containing anhydrides; GO:0017111 nucleoside-triphosphatase activity;			S	KOG2484	GTPase
TRINITY_DN351_c0_g1_m.9690	Probable phospholipid hydroperoxide glutathione peroxidase 6, mitochondrial OS=Arabidopsis thaliana OX=3702 GN=GPX6 PE=2 SV=2	GPX6	1.8502	8.17952e-05	Up	26.702	57.3	11	11	0.685911	0.664466	0.64817	1.30746	1.16314	1.22704	1.13488	1.07827	1.09067	chloroplast	K00432	gpx, btuE, bsaA; glutathione peroxidase [EC:1.11.1.9]	map00480 Glutathione metabolism; map00590 Arachidonic acid metabolism; map01100 Metabolic pathways	GO:0006950 response to stress; GO:0006970 response to osmotic stress; GO:0008152 metabolic process; GO:0009628 response to abiotic stimulus; GO:0009636 response to toxic substance; GO:0009651 response to salt stress; GO:0009987 cellular process; GO:0010035 response to inorganic substance; GO:0010038 response to metal ion; GO:0042221 response to chemical; GO:0046686 response to cadmium ion; GO:005…	GO:0005576 extracellular region; GO:0005622 intracellular; GO:0005623 cell; GO:0005737 cytoplasm; GO:0005739 mitochondrion; GO:0005829 cytosol; GO:0005886 plasma membrane; GO:0009507 chloroplast; GO:0009536 plastid; GO:0016020 membrane; GO:0043226 organelle; GO:0043227 membrane-bounded organelle; GO:0043229 intracellular organelle; GO:0043231 intracellular membrane-bounded organelle; GO:0048046 a…	GO:0003824 catalytic activity; GO:0004601 peroxidase activity; GO:0004602 glutathione peroxidase activity; GO:0016209 antioxidant activity; GO:0016491 oxidoreductase activity; GO:0016684 oxidoreductase activity, acting on peroxide as acceptor;			O	KOG1651	Glutathione peroxidase
TRINITY_DN3524_c0_g1_m.9720	protein SLOW GREEN 1, chloroplastic OS=Arabidopsis thaliana OX=3702 GN=SG1 PE=1 SV=1	SG1	1.519	3.16502e-05	Up	40.141	44.6	16	16	0.794915	0.814512	0.839754	1.22084	1.22893	1.27058	0.957445	0.938966	0.934066	chloroplast
TRINITY_DN3531_c0_g1_m.9732	Heterogeneous nuclear ribonucleoprotein Q OS=Arabidopsis thaliana OX=3702 GN=LIF2 PE=1 SV=1	LIF2	0.5902	0.00159629	Down	52.862	17	5	5	1.57148	1.49761	1.49526	0.784139	0.925525	0.984221	0.610024	0.564613	0.567135	nucleus	K13161	HNRNPR; heterogeneous nuclear ribonucleoprotein R		GO:0000375 RNA splicing, via transesterification reactions; GO:0000377 RNA splicing, via transesterification reactions with bulged adenosine as nucleophile; GO:0000398 mRNA splicing, via spliceosome; GO:0001101 response to acid chemical; GO:0002376 immune system process; GO:0002682 regulation of immune system process; GO:0002683 negative regulation of immune system process; GO:0006109 regulation …	GO:0005622 intracellular; GO:0005623 cell; GO:0005634 nucleus; GO:0005681 spliceosomal complex; GO:0005737 cytoplasm; GO:0005829 cytosol; GO:0032991 protein-containing complex; GO:0043226 organelle; GO:0043227 membrane-bounded organelle; GO:0043229 intracellular organelle; GO:0043231 intracellular membrane-bounded organelle; GO:0070937 CRD-mediated mRNA stability complex; GO:0071013 catalytic ste…	GO:0003676 nucleic acid binding; GO:0003677 DNA binding; GO:0003682 chromatin binding; GO:0003723 RNA binding; GO:0003729 mRNA binding; GO:0005488 binding; GO:0043565 sequence-specific DNA binding; GO:0097159 organic cyclic compound binding; GO:1901363 heterocyclic compound binding;	PF00076	RNA recognition motif. (a.k.a. RRM, RBD, or RNP domain)	A	KOG0117	Heterogeneous nuclear ribonucleoprotein R (RRM superfamily)
TRINITY_DN3532_c0_g1_m.9736	trypsin inhibitor A [Morus notabilis]	--	0.2025	8.05617e-07	Down	15.918	31.5	3	3	2.26536	2.50139	2.33721	0.476057	0.474533	0.488051	0.199091	0.14467	0.113639	chloroplast							PF00197	Trypsin and protease inhibitor
TRINITY_DN35361_c0_g1_m.9743	Cytochrome b6-f complex iron-sulfur subunit, chloroplastic OS=Pisum sativum OX=3888 GN=petC PE=2 SV=1	petC	0.6409	6.72634e-05	Down	24.409	35.8	5	5	1.39256	1.35424	1.32162	0.9057	0.855018	0.846585	0.844136	0.749592	0.730555	chloroplast	K02636	petC; cytochrome b6-f complex iron-sulfur subunit [EC:7.1.1.6]	map00195 Photosynthesis; map01100 Metabolic pathways		GO:0005622 intracellular; GO:0005623 cell; GO:0005737 cytoplasm; GO:0009507 chloroplast; GO:0009534 chloroplast thylakoid; GO:0009535 chloroplast thylakoid membrane; GO:0009536 plastid; GO:0009579 thylakoid; GO:0016020 membrane; GO:0031976 plastid thylakoid; GO:0031984 organelle subcompartment; GO:0034357 photosynthetic membrane; GO:0042651 thylakoid membrane; GO:0043226 organelle; GO:0043227 mem…		PF08802; PF00355	Cytochrome B6-F complex Fe-S subunit ; Rieske [2Fe-2S] domain	C	KOG1671	Ubiquinol cytochrome c reductase, subunit RIP1
TRINITY_DN354_c1_g1_m.9791	Phosphoenolpyruvate/phosphate translocator 1, chloroplastic OS=Arabidopsis thaliana OX=3702 GN=PPT1 PE=1 SV=1	PPT1	0.4621	0.0108103	Down	51.455	12.9	4	4	1.21115	1.45248	1.20132	0.446307	0.552303	0.787426	1.06239	1.17145	1.11517	plasma membrane	K15283	SLC35E1; solute carrier family 35, member E1		GO:0006810 transport; GO:0006811 ion transport; GO:0006820 anion transport; GO:0008643 carbohydrate transport; GO:0015711 organic anion transport; GO:0015713 phosphoglycerate transmembrane transport; GO:0015714 phosphoenolpyruvate transport; GO:0015717 triose phosphate transport; GO:0015718 monocarboxylic acid transport; GO:0015748 organophosphate ester transport; GO:0015849 organic acid transpor…	GO:0005622 intracellular; GO:0005623 cell; GO:0005737 cytoplasm; GO:0005739 mitochondrion; GO:0009507 chloroplast; GO:0009526 plastid envelope; GO:0009528 plastid inner membrane; GO:0009536 plastid; GO:0009941 chloroplast envelope; GO:0016020 membrane; GO:0019866 organelle inner membrane; GO:0031090 organelle membrane; GO:0031967 organelle envelope; GO:0031969 chloroplast membrane; GO:0031975 env…	GO:0005215 transporter activity; GO:0005342 organic acid transmembrane transporter activity; GO:0008028 monocarboxylic acid transmembrane transporter activity; GO:0008509 anion transmembrane transporter activity; GO:0008514 organic anion transmembrane transporter activity; GO:0015075 ion transmembrane transporter activity; GO:0015120 phosphoglycerate transmembrane transporter activity; GO:0015121…			EG	KOG1441	Glucose-6-phosphate/phosphate and phosphoenolpyruvate/phosphate antiporter
TRINITY_DN3544_c0_g1_m.9780	Probable calcium-binding protein CML23 OS=Arabidopsis thaliana OX=3702 GN=CML23 PE=2 SV=1	CML23	0.5423	0.0001848	Down	16.619	45	7	7	1.40814	1.42704	1.34343	0.819536	0.713973	0.732571	0.85669	0.888505	0.810108	nucleus	K13448	CML; calcium-binding protein CML	map04626 Plant-pathogen interaction	GO:0001505 regulation of neurotransmitter levels; GO:0009909 regulation of flower development; GO:0019222 regulation of metabolic process; GO:0031323 regulation of cellular metabolic process; GO:0048580 regulation of post-embryonic development; GO:0048831 regulation of shoot system development; GO:0050789 regulation of biological process; GO:0050793 regulation of developmental process; GO:0050794…		GO:0005488 binding; GO:0005509 calcium ion binding; GO:0043167 ion binding; GO:0043169 cation binding; GO:0046872 metal ion binding;	PF13499	EF-hand domain pair	T	KOG0027	Calmodulin and related proteins (EF-Hand superfamily)
TRINITY_DN3546_c0_g1_m.9782	Probable methyltransferase PMT13 OS=Arabidopsis thaliana OX=3702 GN=At4g00740 PE=2 SV=1	At4g00740	0.5205	0.000237806	Down	67.532	20	9	9	1.43796	1.46453	1.6538	0.748031	0.823244	0.800099	0.629306	0.704527	0.738514	chloroplast				GO:0005975 carbohydrate metabolic process; GO:0005976 polysaccharide metabolic process; GO:0008152 metabolic process; GO:0009664 plant-type cell wall organization; GO:0009987 cellular process; GO:0010393 galacturonan metabolic process; GO:0016043 cellular component organization; GO:0017144 drug metabolic process; GO:0032259 methylation; GO:0043170 macromolecule metabolic process; GO:0044237 cellu…	GO:0005622 intracellular; GO:0005623 cell; GO:0005737 cytoplasm; GO:0005768 endosome; GO:0005794 Golgi apparatus; GO:0005802 trans-Golgi network; GO:0012505 endomembrane system; GO:0016020 membrane; GO:0016021 integral component of membrane; GO:0031224 intrinsic component of membrane; GO:0031410 cytoplasmic vesicle; GO:0031982 vesicle; GO:0031984 organelle subcompartment; GO:0043226 organelle; GO…	GO:0003824 catalytic activity; GO:0008168 methyltransferase activity; GO:0008757 S-adenosylmethionine-dependent methyltransferase activity; GO:0016740 transferase activity; GO:0016741 transferase activity, transferring one-carbon groups;
TRINITY_DN3559_c0_g1_m.9815	Protochlorophyllide reductase, chloroplastic OS=Cucumis sativus OX=3659 GN=PORA PE=2 SV=1	PORA	0.3202	1.08354e-06	Down	42.992	62.2	20	16	1.84166	1.94049	1.86049	0.583792	0.619587	0.603173	0.492842	0.521547	0.536428	chloroplast	K00218	por; protochlorophyllide reductase [EC:1.3.1.33]	map00860 Porphyrin and chlorophyll metabolism; map01100 Metabolic pathways; map01110 Biosynthesis of secondary metabolites	GO:0007275 multicellular organism development; GO:0008152 metabolic process; GO:0009314 response to radiation; GO:0009416 response to light stimulus; GO:0009628 response to abiotic stimulus; GO:0009639 response to red or far red light; GO:0009640 photomorphogenesis; GO:0009642 response to light intensity; GO:0009646 response to absence of light; GO:0009647 skotomorphogenesis; GO:0009719 response …	GO:0005622 intracellular; GO:0005623 cell; GO:0005737 cytoplasm; GO:0009507 chloroplast; GO:0009526 plastid envelope; GO:0009527 plastid outer membrane; GO:0009534 chloroplast thylakoid; GO:0009535 chloroplast thylakoid membrane; GO:0009536 plastid; GO:0009579 thylakoid; GO:0009707 chloroplast outer membrane; GO:0009941 chloroplast envelope; GO:0016020 membrane; GO:0019867 outer membrane; GO:0031…	GO:0003824 catalytic activity; GO:0005488 binding; GO:0005515 protein binding; GO:0016491 oxidoreductase activity; GO:0016627 oxidoreductase activity, acting on the CH-CH group of donors; GO:0016628 oxidoreductase activity, acting on the CH-CH group of donors, NAD or NADP as acceptor; GO:0016630 protochlorophyllide reductase activity; GO:0019904 protein domain specific binding;	PF00106	short chain dehydrogenase	Q	KOG1208	Dehydrogenases with different specificities (related to short-chain alcohol dehydrogenases)
TRINITY_DN3559_c0_g2_m.9817	Protochlorophyllide reductase, chloroplastic OS=Cucumis sativus OX=3659 GN=PORA PE=2 SV=1	PORA	0.5848	8.09345e-06	Down	45.553	59.2	21	17	1.42522	1.47856	1.43839	0.830669	0.871013	0.837576	0.680271	0.71325	0.725052	chloroplast	K00218	por; protochlorophyllide reductase [EC:1.3.1.33]	map00860 Porphyrin and chlorophyll metabolism; map01100 Metabolic pathways; map01110 Biosynthesis of secondary metabolites	GO:0008152 metabolic process; GO:0055114 oxidation-reduction process;	GO:0005622 intracellular; GO:0005623 cell; GO:0005737 cytoplasm; GO:0009507 chloroplast; GO:0009526 plastid envelope; GO:0009534 chloroplast thylakoid; GO:0009535 chloroplast thylakoid membrane; GO:0009536 plastid; GO:0009579 thylakoid; GO:0009941 chloroplast envelope; GO:0016020 membrane; GO:0031967 organelle envelope; GO:0031975 envelope; GO:0031976 plastid thylakoid; GO:0031984 organelle subco…	GO:0003824 catalytic activity; GO:0003959 NADPH dehydrogenase activity; GO:0016491 oxidoreductase activity; GO:0016651 oxidoreductase activity, acting on NAD(P)H;	PF00106	short chain dehydrogenase	Q	KOG1208	Dehydrogenases with different specificities (related to short-chain alcohol dehydrogenases)
TRINITY_DN35693_c0_g1_m.9849	Leucoanthocyanidin reductase OS=Desmodium uncinatum OX=225101 GN=LAR PE=1 SV=1	LAR	2.5135	5.26625e-05	Up	37.978	42.5	10	10	0.30989	0.335725	0.291944	0.833355	0.764849	0.758342	2.03426	1.8242	1.84744	chloroplast	K13081	LAR; leucoanthocyanidin reductase [EC:1.17.1.3]	map00941 Flavonoid biosynthesis; map01110 Biosynthesis of secondary metabolites
TRINITY_DN357_c0_g2_m.9877	AP-1 complex subunit mu-2 OS=Arabidopsis thaliana OX=3702 GN=AP1M2 PE=1 SV=1	AP1M2	0.607	0.000925559	Down	48.966	38.1	12	4	1.46738	1.31427	1.29797	0.75863	0.859735	0.857979	0.79831	0.832072	0.813657	cytoplasm	K12393	AP1M; AP-1 complex subunit mu		GO:0001775 cell activation; GO:0002119 nematode larval development; GO:0002164 larval development; GO:0002252 immune effector process; GO:0002263 cell activation involved in immune response; GO:0002274 myeloid leukocyte activation; GO:0002275 myeloid cell activation involved in immune response; GO:0002283 neutrophil activation involved in immune response; GO:0002366 leukocyte activation involved …	GO:0000139 Golgi membrane; GO:0000323 lytic vacuole; GO:0005622 intracellular; GO:0005623 cell; GO:0005737 cytoplasm; GO:0005764 lysosome; GO:0005765 lysosomal membrane; GO:0005773 vacuole; GO:0005774 vacuolar membrane; GO:0005794 Golgi apparatus; GO:0005798 Golgi-associated vesicle; GO:0005802 trans-Golgi network; GO:0005829 cytosol; GO:0005886 plasma membrane; GO:0012505 endomembrane system; GO…		PF01217	Clathrin adaptor complex small chain	U	KOG0937	Adaptor complexes medium subunit family
TRINITY_DN3575_c0_g1_m.9865	Prohibitin-3, mitochondrial OS=Arabidopsis thaliana OX=3702 GN=PHB3 PE=1 SV=1	PHB3	0.5053	0.00017617	Down	30.476	64.9	13	13	1.1542	1.17095	1.19562	0.535388	0.621073	0.62241	1.15951	1.30545	1.23541	chloroplast	K17080	PHB1; prohibitin 1		GO:0000302 response to reactive oxygen species; GO:0006950 response to stress; GO:0006970 response to osmotic stress; GO:0006979 response to oxidative stress; GO:0006996 organelle organization; GO:0007005 mitochondrion organization; GO:0007275 multicellular organism development; GO:0009628 response to abiotic stimulus; GO:0009651 response to salt stress; GO:0009719 response to endogenous stimulus…	GO:0005618 cell wall; GO:0005622 intracellular; GO:0005623 cell; GO:0005634 nucleus; GO:0005730 nucleolus; GO:0005737 cytoplasm; GO:0005739 mitochondrion; GO:0005740 mitochondrial envelope; GO:0005743 mitochondrial inner membrane; GO:0005746 mitochondrial respirasome; GO:0005747 mitochondrial respiratory chain complex I; GO:0005773 vacuole; GO:0005774 vacuolar membrane; GO:0005886 plasma membrane…				O	KOG3083	Prohibitin
TRINITY_DN35807_c0_g1_m.9879	Peroxidase 42 OS=Arabidopsis thaliana OX=3702 GN=PER42 PE=1 SV=2	PER42	0.613	3.4712e-07	Down	38.511	45.3	10	10	1.49863	1.47033	1.48891	0.919914	0.904165	0.908666	0.621203	0.597279	0.590905	cytoplasm	K00430	E1.11.1.7; peroxidase [EC:1.11.1.7]	map00940 Phenylpropanoid biosynthesis; map01100 Metabolic pathways; map01110 Biosynthesis of secondary metabolites	GO:0008152 metabolic process; GO:0009636 response to toxic substance; GO:0009664 plant-type cell wall organization; GO:0009987 cellular process; GO:0016043 cellular component organization; GO:0042221 response to chemical; GO:0045229 external encapsulating structure organization; GO:0050896 response to stimulus; GO:0051716 cellular response to stimulus; GO:0055114 oxidation-reduction process; GO:0…	GO:0005618 cell wall; GO:0005623 cell; GO:0005911 cell-cell junction; GO:0009505 plant-type cell wall; GO:0009506 plasmodesma; GO:0030054 cell junction; GO:0030312 external encapsulating structure; GO:0055044 symplast; GO:0071944 cell periphery;	GO:0003824 catalytic activity; GO:0004601 peroxidase activity; GO:0016209 antioxidant activity; GO:0016491 oxidoreductase activity; GO:0016684 oxidoreductase activity, acting on peroxide as acceptor;	PF00141	Peroxidase
TRINITY_DN3589_c1_g2_m.9898	Alpha-aminoadipic semialdehyde synthase OS=Arabidopsis thaliana OX=3702 GN=LKR/SDH PE=1 SV=1	LKR/SDH	1.6203	1.06707e-05	Up	115.97	46.7	34	34	0.543761	0.541667	0.555155	0.877178	0.913874	0.867181	1.55231	1.57021	1.57867	cytoplasm	K14157	AASS; alpha-aminoadipic semialdehyde synthase [EC:1.5.1.8 1.5.1.9]	map00310 Lysine degradation; map01100 Metabolic pathways; map01110 Biosynthesis of secondary metabolites	GO:0006082 organic acid metabolic process; GO:0006091 generation of precursor metabolites and energy; GO:0006520 cellular amino acid metabolic process; GO:0006553 lysine metabolic process; GO:0006807 nitrogen compound metabolic process; GO:0008152 metabolic process; GO:0008652 cellular amino acid biosynthetic process; GO:0009058 biosynthetic process; GO:0009066 aspartate family amino acid metabol…	GO:0005622 intracellular; GO:0005623 cell; GO:0005737 cytoplasm;	GO:0003824 catalytic activity; GO:0004753 saccharopine dehydrogenase activity; GO:0016491 oxidoreductase activity; GO:0016645 oxidoreductase activity, acting on the CH-NH group of donors; GO:0016646 oxidoreductase activity, acting on the CH-NH group of donors, NAD or NADP as acceptor;	PF05222	Alanine dehydrogenase/PNT, N-terminal domain	E	KOG0172	Lysine-ketoglutarate reductase/saccharopine dehydrogenase
TRINITY_DN360_c0_g1_m.9973	CBS domain-containing protein CBSX1, chloroplastic OS=Arabidopsis thaliana OX=3702 GN=CBSX1 PE=1 SV=2	CBSX1	0.5249	0.000377766	Down	23.004	22.3	4	3	1.48252	1.51294	1.74903	0.8366	0.863043	0.790822	0.438423	0.571573	0.755044	nucleus				GO:0009987 cellular process; GO:0019725 cellular homeostasis; GO:0042592 homeostatic process; GO:0045454 cell redox homeostasis; GO:0050789 regulation of biological process; GO:0050794 regulation of cellular process; GO:0065007 biological regulation; GO:0065008 regulation of biological quality;	GO:0005622 intracellular; GO:0005623 cell; GO:0005737 cytoplasm; GO:0009507 chloroplast; GO:0009536 plastid; GO:0043226 organelle; GO:0043227 membrane-bounded organelle; GO:0043229 intracellular organelle; GO:0043231 intracellular membrane-bounded organelle;		PF00571	CBS domain
TRINITY_DN36139_c0_g1_m.9991	Plastocyanin, chloroplastic OS=Solanum lycopersicum OX=4081 GN=PETE PE=2 SV=1	PETE	0.3547	4.64448e-09	Down	16.588	39.4	3	3	1.99421	2.01	2.01635	0.716585	0.70599	0.712947	0.300612	0.271403	0.271905	chloroplast	K02638	petE; plastocyanin	map00195 Photosynthesis	GO:0006091 generation of precursor metabolites and energy; GO:0006417 regulation of translation; GO:0008152 metabolic process; GO:0009889 regulation of biosynthetic process; GO:0009890 negative regulation of biosynthetic process; GO:0009892 negative regulation of metabolic process; GO:0009987 cellular process; GO:0010035 response to inorganic substance; GO:0010038 response to metal ion; GO:001046…	GO:0005622 intracellular; GO:0005623 cell; GO:0005737 cytoplasm; GO:0009507 chloroplast; GO:0009532 plastid stroma; GO:0009534 chloroplast thylakoid; GO:0009536 plastid; GO:0009570 chloroplast stroma; GO:0009579 thylakoid; GO:0016020 membrane; GO:0031976 plastid thylakoid; GO:0031977 thylakoid lumen; GO:0031984 organelle subcompartment; GO:0034357 photosynthetic membrane; GO:0042651 thylakoid mem…	GO:0003824 catalytic activity; GO:0005488 binding; GO:0005515 protein binding; GO:0009055 electron transfer activity; GO:0016491 oxidoreductase activity; GO:0019904 protein domain specific binding; GO:0046028 electron transporter, transferring electrons from cytochrome b6/f complex of photosystem II activity;	PF00127	Copper binding proteins, plastocyanin/azurin family
TRINITY_DN3616_c0_g2_m.10001	Fructose-bisphosphate aldolase 2, chloroplastic OS=Arabidopsis thaliana OX=3702 GN=FBA2 PE=1 SV=2	FBA2	0.2022	6.11299e-05	Down	42.835	28.1	9	7	2.05036	2.04432	2.46414	0.400735	0.500632	0.425086	0.371583	0.320287	0.422856	chloroplast	K01623	ALDO; fructose-bisphosphate aldolase, class I [EC:4.1.2.13]	map00010 Glycolysis / Gluconeogenesis; map00030 Pentose phosphate pathway; map00051 Fructose and mannose metabolism; map00710 Carbon fixation in photosynthetic organisms; map01100 Metabolic pathways; map01110 Biosynthesis of secondary metabolites; map01200 Carbon metabolism; map01230 Biosynthesis of amino acids	GO:0001101 response to acid chemical; GO:0005975 carbohydrate metabolic process; GO:0005996 monosaccharide metabolic process; GO:0006006 glucose metabolic process; GO:0006082 organic acid metabolic process; GO:0006090 pyruvate metabolic process; GO:0006091 generation of precursor metabolites and energy; GO:0006094 gluconeogenesis; GO:0006096 glycolytic process; GO:0006139 nucleobase-containing co…	GO:0005576 extracellular region; GO:0005622 intracellular; GO:0005623 cell; GO:0005737 cytoplasm; GO:0005829 cytosol; GO:0005840 ribosome; GO:0009507 chloroplast; GO:0009526 plastid envelope; GO:0009532 plastid stroma; GO:0009534 chloroplast thylakoid; GO:0009536 plastid; GO:0009570 chloroplast stroma; GO:0009579 thylakoid; GO:0009941 chloroplast envelope; GO:0010287 plastoglobule; GO:0016020 mem…	GO:0003824 catalytic activity; GO:0004332 fructose-bisphosphate aldolase activity; GO:0016829 lyase activity; GO:0016830 carbon-carbon lyase activity; GO:0016832 aldehyde-lyase activity;	PF00274	Fructose-bisphosphate aldolase class-I	G	KOG1557	Fructose-biphosphate aldolase
TRINITY_DN362_c0_g2_m.10029	Terpene synthase 10 OS=Ricinus communis OX=3988 GN=TPS10 PE=2 SV=1	TPS10	1.635	0.0334164	Up	53.433	11.4	4	3	0.908421	0.783178	0.85037	1.02209	1.54594	1.58813	0.926623	0.560387	0.81485	chloroplast	K07385	TPS-Cin; 1,8-cineole synthase [EC:4.2.3.108]	map00902 Monoterpenoid biosynthesis; map01100 Metabolic pathways; map01110 Biosynthesis of secondary metabolites	GO:0001101 response to acid chemical; GO:0006629 lipid metabolic process; GO:0006714 sesquiterpenoid metabolic process; GO:0006720 isoprenoid metabolic process; GO:0006721 terpenoid metabolic process; GO:0006950 response to stress; GO:0008152 metabolic process; GO:0008299 isoprenoid biosynthetic process; GO:0008610 lipid biosynthetic process; GO:0009058 biosynthetic process; GO:0009605 response t…	GO:0005622 intracellular; GO:0005623 cell; GO:0005737 cytoplasm; GO:0005829 cytosol; GO:0009507 chloroplast; GO:0009532 plastid stroma; GO:0009536 plastid; GO:0009570 chloroplast stroma; GO:0043226 organelle; GO:0043227 membrane-bounded organelle; GO:0043229 intracellular organelle; GO:0043231 intracellular membrane-bounded organelle;	GO:0003824 catalytic activity; GO:0009975 cyclase activity; GO:0010333 terpene synthase activity; GO:0010334 sesquiterpene synthase activity; GO:0016829 lyase activity; GO:0016835 carbon-oxygen lyase activity; GO:0016838 carbon-oxygen lyase activity, acting on phosphates; GO:0034002 (R)-limonene synthase activity; GO:0034768 (E)-beta-ocimene synthase activity; GO:0050550 pinene synthase activity;…	PF01397; PF03936	Terpene synthase, N-terminal domain; Terpene synthase family, metal binding domain
TRINITY_DN3631_c0_g1_m.10038	2-C-methyl-D-erythritol 2,4-cyclodiphosphate synthase, chloroplastic OS=Catharanthus roseus OX=4058 GN=ISPF PE=2 SV=1	ISPF	0.621	0.000824277	Down	26.021	31.5	6	6	1.14533	1.18489	1.2036	0.659615	0.775031	0.759973	1.04915	1.1049	1.1175	chloroplast	K01770	ispF; 2-C-methyl-D-erythritol 2,4-cyclodiphosphate synthase [EC:4.6.1.12]	map00900 Terpenoid backbone biosynthesis; map01100 Metabolic pathways; map01110 Biosynthesis of secondary metabolites	GO:0006629 lipid metabolic process; GO:0006720 isoprenoid metabolic process; GO:0006721 terpenoid metabolic process; GO:0006725 cellular aromatic compound metabolic process; GO:0006778 porphyrin-containing compound metabolic process; GO:0006779 porphyrin-containing compound biosynthetic process; GO:0006807 nitrogen compound metabolic process; GO:0008152 metabolic process; GO:0008299 isoprenoid bi…	GO:0005622 intracellular; GO:0005623 cell; GO:0005737 cytoplasm; GO:0009507 chloroplast; GO:0009532 plastid stroma; GO:0009536 plastid; GO:0009570 chloroplast stroma; GO:0043226 organelle; GO:0043227 membrane-bounded organelle; GO:0043229 intracellular organelle; GO:0043231 intracellular membrane-bounded organelle;
TRINITY_DN3644_c0_g1_m.10076	AT-hook motif nuclear-localized protein 29 OS=Arabidopsis thaliana OX=3702 GN=AHL29 PE=1 SV=1	AHL29	0.4512	0.00105572	Down	28.758	16	3	2	1.74286	1.49762	1.59804	0.69607	0.847735	0.639515	0.600477	0.833972	0.543725	nucleus				GO:0006355 regulation of transcription, DNA-templated; GO:0009889 regulation of biosynthetic process; GO:0009937 regulation of gibberellic acid mediated signaling pathway; GO:0009938 negative regulation of gibberellic acid mediated signaling pathway; GO:0009966 regulation of signal transduction; GO:0009968 negative regulation of signal transduction; GO:0010468 regulation of gene expression; GO:00…	GO:0005622 intracellular; GO:0005623 cell; GO:0005634 nucleus; GO:0043226 organelle; GO:0043227 membrane-bounded organelle; GO:0043229 intracellular organelle; GO:0043231 intracellular membrane-bounded organelle;	GO:0003676 nucleic acid binding; GO:0003677 DNA binding; GO:0003680 AT DNA binding; GO:0003690 double-stranded DNA binding; GO:0003700 DNA-binding transcription factor activity; GO:0005488 binding; GO:0005515 protein binding; GO:0043565 sequence-specific DNA binding; GO:0043621 protein self-association; GO:0097159 organic cyclic compound binding; GO:0140110 transcription regulator activity; GO:19…	PF03479	Domain of unknown function (DUF296)
TRINITY_DN3658_c0_g1_m.10102	Polyadenylate-binding protein-interacting protein 10 OS=Arabidopsis thaliana OX=3702 GN=CID10 PE=2 SV=1	CID10	0.6205	0.000216492	Down	107.41	3.5	2	2	1.4616	1.43744	1.30266	0.852736	0.881983	0.872465	0.733135	0.742654	0.715326	nucleus							PF00630; PF00076	Filamin/ABP280 repeat; RNA recognition motif. (a.k.a. RRM, RBD, or RNP domain)
TRINITY_DN3665_c1_g1_m.10117	Shikimate kinase, chloroplastic OS=Solanum lycopersicum OX=4081 GN=SK PE=1 SV=1	SK	0.3043	1.20855e-05	Down	33.162	20.7	4	4	2.04094	1.90531	1.97108	0.644324	0.595863	0.560455	0.379725	0.452774	0.449531	chloroplast	K00891	E2.7.1.71, aroK, aroL; shikimate kinase [EC:2.7.1.71]	map00400 Phenylalanine, tyrosine and tryptophan biosynthesis; map01100 Metabolic pathways; map01110 Biosynthesis of secondary metabolites; map01230 Biosynthesis of amino acids	GO:0006082 organic acid metabolic process; GO:0006520 cellular amino acid metabolic process; GO:0006725 cellular aromatic compound metabolic process; GO:0006793 phosphorus metabolic process; GO:0006796 phosphate-containing compound metabolic process; GO:0006807 nitrogen compound metabolic process; GO:0008152 metabolic process; GO:0008652 cellular amino acid biosynthetic process; GO:0009058 biosyn…		GO:0000287 magnesium ion binding; GO:0003824 catalytic activity; GO:0004765 shikimate kinase activity; GO:0005488 binding; GO:0016301 kinase activity; GO:0016740 transferase activity; GO:0016772 transferase activity, transferring phosphorus-containing groups; GO:0016773 phosphotransferase activity, alcohol group as acceptor; GO:0043167 ion binding; GO:0043169 cation binding; GO:0046872 metal ion …	PF01202	Shikimate kinase
TRINITY_DN3671_c1_g1_m.10139	Cinnamoyl-CoA reductase 1 OS=Arabidopsis thaliana OX=3702 GN=CCR1 PE=1 SV=1	CCR1	0.6553	3.33791e-06	Down	37.038	42	10	10	1.29112	1.32602	1.2887	0.863006	0.853933	0.842467	0.856024	0.841049	0.837682	chloroplast	K09753	CCR; cinnamoyl-CoA reductase [EC:1.2.1.44]	map00940 Phenylpropanoid biosynthesis; map01100 Metabolic pathways; map01110 Biosynthesis of secondary metabolites	GO:0006725 cellular aromatic compound metabolic process; GO:0006950 response to stress; GO:0007623 circadian rhythm; GO:0008152 metabolic process; GO:0009058 biosynthetic process; GO:0009266 response to temperature stimulus; GO:0009409 response to cold; GO:0009628 response to abiotic stimulus; GO:0009698 phenylpropanoid metabolic process; GO:0009699 phenylpropanoid biosynthetic process; GO:000980…	GO:0005622 intracellular; GO:0005623 cell; GO:0005737 cytoplasm; GO:0005829 cytosol;	GO:0003824 catalytic activity; GO:0016491 oxidoreductase activity; GO:0016620 oxidoreductase activity, acting on the aldehyde or oxo group of donors, NAD or NADP as acceptor; GO:0016621 cinnamoyl-CoA reductase activity; GO:0016903 oxidoreductase activity, acting on the aldehyde or oxo group of donors;			V	KOG1502	Flavonol reductase/cinnamoyl-CoA reductase
TRINITY_DN3677_c0_g1_m.10151	17.9 kDa class II heat shock protein OS=Glycine max OX=3847 GN=HSP17.9-D PE=3 SV=1	HSP17.9-D	2.9546	2.76106e-05	Up	17.654	43.4	4	3	0.389294	0.399105	0.400537	1.05902	1.21325	1.24054	1.36536	1.47452	1.45838	cytoplasm	K13993	HSP20; HSP20 family protein	map04141 Protein processing in endoplasmic reticulum		GO:0005622 intracellular; GO:0005623 cell; GO:0005737 cytoplasm;				O	KOG0710	Molecular chaperone (small heat-shock protein Hsp26/Hsp42)
TRINITY_DN3677_c2_g1_m.10157	Nucleoid-associated protein At4g30620, chloroplastic OS=Arabidopsis thaliana OX=3702 GN=At4g30620 PE=1 SV=1	At4g30620	0.5767	0.01718	Down	24.267	18.1	3	3	1.0825	1.16623	1.19401	0.765923	0.489596	0.730013	1.31495	1.04513	1.21164	chloroplast				GO:0006605 protein targeting; GO:0006810 transport; GO:0006886 intracellular protein transport; GO:0008104 protein localization; GO:0015031 protein transport; GO:0015833 peptide transport; GO:0017038 protein import; GO:0033036 macromolecule localization; GO:0033365 protein localization to organelle; GO:0034613 cellular protein localization; GO:0042886 amide transport; GO:0045036 protein targeting…	GO:0005622 intracellular; GO:0005623 cell; GO:0005737 cytoplasm; GO:0009507 chloroplast; GO:0009526 plastid envelope; GO:0009532 plastid stroma; GO:0009534 chloroplast thylakoid; GO:0009535 chloroplast thylakoid membrane; GO:0009536 plastid; GO:0009570 chloroplast stroma; GO:0009579 thylakoid; GO:0009941 chloroplast envelope; GO:0016020 membrane; GO:0031967 organelle envelope; GO:0031975 envelope…				L	KOG0017	FOG: Transposon-encoded proteins with TYA, reverse transcriptase, integrase domains in various combinations
TRINITY_DN3724_c0_g1_m.10280	Probable U6 snRNA-associated Sm-like protein LSm4 OS=Nicotiana tabacum OX=4097 PE=2 SV=1	--	0.5901	0.00264173	Down	16.046	17.3	3	3	1.27311	1.42915	1.15197	0.718401	0.833393	0.722505	1.04013	0.907817	0.923523	extracellular	K12623	LSM4; U6 snRNA-associated Sm-like protein LSm4	map03018 RNA degradation; map03040 Spliceosome	GO:0000245 spliceosomal complex assembly; GO:0000375 RNA splicing, via transesterification reactions; GO:0000377 RNA splicing, via transesterification reactions with bulged adenosine as nucleophile; GO:0000387 spliceosomal snRNP assembly; GO:0000398 mRNA splicing, via spliceosome; GO:0000956 nuclear-transcribed mRNA catabolic process; GO:0006139 nucleobase-containing compound metabolic process; G…	GO:0000932 P-body; GO:0005622 intracellular; GO:0005623 cell; GO:0005634 nucleus; GO:0005688 U6 snRNP; GO:0005737 cytoplasm; GO:0030532 small nuclear ribonucleoprotein complex; GO:0032991 protein-containing complex; GO:0035770 ribonucleoprotein granule; GO:0036464 cytoplasmic ribonucleoprotein granule; GO:0043226 organelle; GO:0043227 membrane-bounded organelle; GO:0043228 non-membrane-bounded or…	GO:0003676 nucleic acid binding; GO:0003723 RNA binding; GO:0005488 binding; GO:0017069 snRNA binding; GO:0017070 U6 snRNA binding; GO:0097159 organic cyclic compound binding; GO:1901363 heterocyclic compound binding;	PF01423	LSM domain	A	KOG3293	Small nuclear ribonucleoprotein (snRNP)
TRINITY_DN3742_c0_g1_m.10322	Deoxycytidine kinase OS=Homo sapiens OX=9606 GN=DCK PE=1 SV=1	DCK	1.596	0.0134734	Up	64.858	17.9	7	7	0.825419	0.709238	0.896346	1.26262	1.50162	1.11571	0.870139	0.813816	1.0051	chloroplast				GO:0006139 nucleobase-containing compound metabolic process; GO:0006213 pyrimidine nucleoside metabolic process; GO:0006220 pyrimidine nucleotide metabolic process; GO:0006725 cellular aromatic compound metabolic process; GO:0006753 nucleoside phosphate metabolic process; GO:0006793 phosphorus metabolic process; GO:0006796 phosphate-containing compound metabolic process; GO:0006807 nitrogen compo…	GO:0005622 intracellular; GO:0005623 cell; GO:0005634 nucleus; GO:0005737 cytoplasm; GO:0005829 cytosol; GO:0043226 organelle; GO:0043227 membrane-bounded organelle; GO:0043229 intracellular organelle; GO:0043231 intracellular membrane-bounded organelle;	GO:0003824 catalytic activity; GO:0004137 deoxycytidine kinase activity; GO:0005488 binding; GO:0005515 protein binding; GO:0008144 drug binding; GO:0016301 kinase activity; GO:0016740 transferase activity; GO:0016772 transferase activity, transferring phosphorus-containing groups; GO:0019136 deoxynucleoside kinase activity; GO:0019205 nucleobase-containing compound kinase activity; GO:0019206 nu…	PF01712	Deoxynucleoside kinase	F	KOG4235	Mitochondrial thymidine kinase 2/deoxyguanosine kinase
TRINITY_DN3748_c0_g1_m.10335	Plastidal glycolate/glycerate translocator 1, chloroplastic OS=Arabidopsis thaliana OX=3702 GN=PLGG1 PE=1 SV=1	PLGG1	0.5839	0.000375605	Down	54.703	6.1	2	2	1.3302	1.31092	1.39674	0.724299	0.787838	0.845474	0.83202	0.851503	0.921008	chloroplast				GO:0006810 transport; GO:0006811 ion transport; GO:0006820 anion transport; GO:0006855 drug transmembrane transport; GO:0006996 organelle organization; GO:0008152 metabolic process; GO:0008643 carbohydrate transport; GO:0009657 plastid organization; GO:0009658 chloroplast organization; GO:0009853 photorespiration; GO:0009987 cellular process; GO:0015711 organic anion transport; GO:0015718 monocar…	GO:0005622 intracellular; GO:0005623 cell; GO:0005737 cytoplasm; GO:0009507 chloroplast; GO:0009526 plastid envelope; GO:0009528 plastid inner membrane; GO:0009536 plastid; GO:0009706 chloroplast inner membrane; GO:0009941 chloroplast envelope; GO:0016020 membrane; GO:0019866 organelle inner membrane; GO:0031090 organelle membrane; GO:0031967 organelle envelope; GO:0031969 chloroplast membrane; G…	GO:0005215 transporter activity; GO:0005342 organic acid transmembrane transporter activity; GO:0008028 monocarboxylic acid transmembrane transporter activity; GO:0008509 anion transmembrane transporter activity; GO:0008514 organic anion transmembrane transporter activity; GO:0015075 ion transmembrane transporter activity; GO:0015144 carbohydrate transmembrane transporter activity; GO:0015318 ino…
TRINITY_DN3751_c0_g1_m.10343	Nucleolar protein 56 OS=Schizosaccharomyces pombe (strain 972 / ATCC 24843) OX=284812 GN=nop56 PE=3 SV=1	nop56	0.6243	2.31646e-06	Down	64.867	42	18	18	1.36642	1.41253	1.3699	0.859908	0.871843	0.858264	0.77746	0.745184	0.738488	chloroplast	K14564	NOP56; nucleolar protein 56	map03008 Ribosome biogenesis in eukaryotes				PF08156	NOP5NT (NUC127) domain	AJ	KOG2573	Ribosome biogenesis protein - Nop56p/Sik1p
TRINITY_DN3763_c0_g1_m.10378	Ras-related protein RABA3 OS=Arabidopsis thaliana OX=3702 GN=RABA3 PE=2 SV=1	RABA3	0.3027	0.045927	Down	25.727	25.6	5	3	2.7843	1.13774	1.67849	0.626034		0.504334	0.459533	0.393641	0.415917	cytoplasm	K07904	RAB11A; Ras-related protein Rab-11A	map04144 Endocytosis	GO:0009987 cellular process; GO:0042546 cell wall biogenesis; GO:0044085 cellular component biogenesis; GO:0071554 cell wall organization or biogenesis; GO:0071840 cellular component organization or biogenesis;	GO:0005622 intracellular; GO:0005623 cell; GO:0005634 nucleus; GO:0005737 cytoplasm; GO:0005768 endosome; GO:0005794 Golgi apparatus; GO:0009504 cell plate; GO:0012505 endomembrane system; GO:0031410 cytoplasmic vesicle; GO:0031982 vesicle; GO:0043226 organelle; GO:0043227 membrane-bounded organelle; GO:0043229 intracellular organelle; GO:0043231 intracellular membrane-bounded organelle; GO:00977…		PF00071	Ras family	U	KOG0087	GTPase Rab11/YPT3, small G protein superfamily
TRINITY_DN3764_c0_g1_m.10379	60S acidic ribosomal protein P1 OS=Zea mays OX=4577 GN=RPP1A PE=1 SV=1	RPP1A	0.4933	5.22734e-05	Down	17.218	43.8	3	2	1.10745	1.04449	1.1365	0.525005	0.573026	0.524226	1.41349	1.37425	1.30157	chloroplast	K02942	RP-LP1, RPLP1; large subunit ribosomal protein LP1	map03010 Ribosome	GO:0001932 regulation of protein phosphorylation; GO:0001934 positive regulation of protein phosphorylation; GO:0002181 cytoplasmic translation; GO:0006412 translation; GO:0006518 peptide metabolic process; GO:0006807 nitrogen compound metabolic process; GO:0008152 metabolic process; GO:0009058 biosynthetic process; GO:0009059 macromolecule biosynthetic process; GO:0009893 positive regulation of …	GO:0005622 intracellular; GO:0005623 cell; GO:0005634 nucleus; GO:0005737 cytoplasm; GO:0005829 cytosol; GO:0005840 ribosome; GO:0005844 polysome; GO:0005886 plasma membrane; GO:0015934 large ribosomal subunit; GO:0016020 membrane; GO:0022625 cytosolic large ribosomal subunit; GO:0022626 cytosolic ribosome; GO:0032991 protein-containing complex; GO:0042788 polysomal ribosome; GO:0043226 organelle…	GO:0003735 structural constituent of ribosome; GO:0005198 structural molecule activity; GO:0005488 binding; GO:0008047 enzyme activator activity; GO:0019207 kinase regulator activity; GO:0019209 kinase activator activity; GO:0019887 protein kinase regulator activity; GO:0030234 enzyme regulator activity; GO:0030295 protein kinase activator activity; GO:0044877 protein-containing complex binding; …			J	KOG1762	60s acidic ribosomal protein P1
TRINITY_DN3778_c0_g1_m.10404	Nascent polypeptide-associated complex subunit alpha-like protein OS=Pinus taeda OX=3352 PE=2 SV=1	--	1.8315	8.29938e-05	Up	24.631	62.6	8	8	0.779312	0.746596	0.730002	1.46313	1.35255	1.31603	0.90933	0.827955	0.875101	chloroplast	K03626	EGD2, NACA; nascent polypeptide-associated complex subunit alpha							K	KOG2239	Transcription factor containing NAC and TS-N domains
TRINITY_DN3781_c0_g1_m.10422	Callose synthase 10 OS=Arabidopsis thaliana OX=3702 GN=CALS10 PE=2 SV=5	CALS10	0.5894	3.39552e-06	Down	218.27	22.9	31	26	1.35584	1.37083	1.41617	0.824108	0.809845	0.807673	0.836497	0.767651	0.811377	plasma membrane	K11000	CALS; callose synthase [EC:2.4.1.-]		GO:0000003 reproduction; GO:0003006 developmental process involved in reproduction; GO:0007049 cell cycle; GO:0007275 multicellular organism development; GO:0009555 pollen development; GO:0009556 microsporogenesis; GO:0009987 cellular process; GO:0019953 sexual reproduction; GO:0022402 cell cycle process; GO:0022414 reproductive process; GO:0032501 multicellular organismal process; GO:0032502 dev…	GO:0005622 intracellular; GO:0005623 cell; GO:0005737 cytoplasm; GO:0005794 Golgi apparatus; GO:0005886 plasma membrane; GO:0005911 cell-cell junction; GO:0009506 plasmodesma; GO:0012505 endomembrane system; GO:0016020 membrane; GO:0030054 cell junction; GO:0043226 organelle; GO:0043227 membrane-bounded organelle; GO:0043229 intracellular organelle; GO:0043231 intracellular membrane-bounded organ…				M	KOG0916	1,3-beta-glucan synthase/callose synthase catalytic subunit
TRINITY_DN3799_c0_g1_m.10479	Protein SMG9 OS=Rattus norvegicus OX=10116 GN=Smg9 PE=1 SV=1	Smg9	1.612	0.0169703	Up	18.678	33.1	4	4	0.697224	0.852599	0.682018	0.991513	1.22466	1.38148	0.97127	1.12309	1.07615	nucleus	K18735	SMG9; protein SMG9							S	KOG4181	Uncharacterized conserved protein
TRINITY_DN38_c2_g1_m.10733	Tetraspanin-8 OS=Arabidopsis thaliana OX=3702 GN=TET8 PE=2 SV=1	TET8	1.548	0.000168751	Up	29.737	27.1	5	5	0.826354	0.843192	0.887279	1.37515	1.31779	1.2649	0.815033	0.828748	0.841552	plasma membrane
TRINITY_DN3809_c0_g1_m.10508	Uncharacterized protein At1g32220, chloroplastic OS=Arabidopsis thaliana OX=3702 GN=At1g32220 PE=1 SV=1	At1g32220	0.5895	0.000928347	Down	30.795	34.3	6	6	1.35315	1.22649	1.28447	0.691183	0.755292	0.831438	0.786222	1.07862	0.993139	chloroplast							PF13460	NADH(P)-binding	GM	KOG4288	Predicted oxidoreductase
TRINITY_DN3813_c0_g1_m.10512	Probable galacturonosyltransferase 9 OS=Arabidopsis thaliana OX=3702 GN=GAUT9 PE=2 SV=1	GAUT9	0.5567	0.00236886	Down	64.478	23.1	10	7	1.50934	1.55291	1.59776	0.738833	0.864381	0.991064	0.639005	0.520001	0.586705	chloroplast	K13648	GAUT; alpha-1,4-galacturonosyltransferase [EC:2.4.1.43]	map00520 Amino sugar and nucleotide sugar metabolism; map01100 Metabolic pathways		GO:0005622 intracellular; GO:0005623 cell; GO:0005737 cytoplasm; GO:0005768 endosome; GO:0005794 Golgi apparatus; GO:0005802 trans-Golgi network; GO:0012505 endomembrane system; GO:0031410 cytoplasmic vesicle; GO:0031982 vesicle; GO:0031984 organelle subcompartment; GO:0043226 organelle; GO:0043227 membrane-bounded organelle; GO:0043229 intracellular organelle; GO:0043231 intracellular membrane-b…	GO:0003824 catalytic activity; GO:0008194 UDP-glycosyltransferase activity; GO:0016740 transferase activity; GO:0016757 transferase activity, transferring glycosyl groups; GO:0016758 transferase activity, transferring hexosyl groups; GO:0047262 polygalacturonate 4-alpha-galacturonosyltransferase activity;
TRINITY_DN3821_c0_g1_m.10529	Transcription initiation factor IIF subunit alpha OS=Arabidopsis thaliana OX=3702 GN=RAP74 PE=1 SV=1	RAP74	0.5866	0.00162672	Down	59.021	6.5	3	3	1.37725	1.43335	1.31069	0.766059	0.737597	0.913809	0.885268	0.829737	0.746243	nucleus	K03138	TFIIF1, GTF2F1, TFG1; transcription initiation factor TFIIF subunit alpha	map03022 Basal transcription factors			GO:0005488 binding; GO:0005515 protein binding; GO:0008022 protein C-terminus binding;			K	KOG2393	Transcription initiation factor IIF, large subunit (RAP74)
TRINITY_DN383_c1_g1_m.10559	Actin-depolymerizing factor 6 OS=Arabidopsis thaliana OX=3702 GN=ADF6 PE=1 SV=1	ADF6	1.5217	0.0118868	Up	16.987	33.6	3	2	0.837731		0.907284		1.35881	1.29664		0.468248	1.13129	mitochondria	K05765	CFL; cofilin		GO:0006996 organelle organization; GO:0007010 cytoskeleton organization; GO:0007015 actin filament organization; GO:0008154 actin polymerization or depolymerization; GO:0009987 cellular process; GO:0016043 cellular component organization; GO:0022411 cellular component disassembly; GO:0030029 actin filament-based process; GO:0030036 actin cytoskeleton organization; GO:0030042 actin filament depoly…			PF00241	Cofilin/tropomyosin-type actin-binding protein	Z	KOG1735	Actin depolymerizing factor
TRINITY_DN383_c3_g1_m.10562	Beta-glucuronosyltransferase GlcAT14B OS=Arabidopsis thaliana OX=3702 GN=GLCAT14B PE=2 SV=1	GLCAT14B	0.5944	0.000222159	Down	48.934	22.6	7	7	1.42473	1.38225	1.4452	0.788319	0.901968	0.837026	0.784649	0.846534	0.589321	cytoplasm	K20891	GLCAT14; beta-glucuronosyltransferase [EC:2.4.1.-]		GO:0000902 cell morphogenesis; GO:0006029 proteoglycan metabolic process; GO:0006807 nitrogen compound metabolic process; GO:0007275 multicellular organism development; GO:0007399 nervous system development; GO:0008152 metabolic process; GO:0009058 biosynthetic process; GO:0009059 macromolecule biosynthetic process; GO:0009100 glycoprotein metabolic process; GO:0009101 glycoprotein biosynthetic p…	GO:0000139 Golgi membrane; GO:0005622 intracellular; GO:0005623 cell; GO:0005737 cytoplasm; GO:0005794 Golgi apparatus; GO:0012505 endomembrane system; GO:0016020 membrane; GO:0031090 organelle membrane; GO:0031984 organelle subcompartment; GO:0043226 organelle; GO:0043227 membrane-bounded organelle; GO:0043229 intracellular organelle; GO:0043231 intracellular membrane-bounded organelle; GO:00985…	GO:0003824 catalytic activity; GO:0008194 UDP-glycosyltransferase activity; GO:0015020 glucuronosyltransferase activity; GO:0016740 transferase activity; GO:0016757 transferase activity, transferring glycosyl groups; GO:0016758 transferase activity, transferring hexosyl groups;			G	KOG0799	Branching enzyme
[truncated: 360 more rows]

## Sheet: R4vsR1
Protein accession	Protein description	Gene name	R4/R1 Ratio	R4/R1 P value	Regulated Type	MW [kDa]	Coverage [%]	Peptides	Unique peptides	R1_1	R1_2	R1_3	R3_1	R3_2	R3_3	R4_1	R4_2	R4_3	Subcellular localization	KEGG KO No.	KEGG Gene	KEGG pathway	Biological Process	Cellular Component	Molecular Function	Pfam ID	Domain description	KOG category	KOG NO.	KOG description
[truncated: 1,100 more rows]

## Sheet: R4vsR3
Protein accession	Protein description	Gene name	R4/R3 Ratio	R4/R3 P value	Regulated Type	MW [kDa]	Coverage [%]	Peptides	Unique peptides	R1_1	R1_2	R1_3	R3_1	R3_2	R3_3	R4_1	R4_2	R4_3	Subcellular localization	KEGG KO No.	KEGG Gene	KEGG pathway	Biological Process	Cellular Component	Molecular Function	Pfam ID	Domain description	KOG category	KOG NO.	KOG description
[truncated: 622 more rows]
