# Supplementary material
Source: MDPI journal article supplement (https://www.mdpi.com/1999-4907/12/10/1384)

## Supplementary 1: Quality Control of MS

Identified peptide length distribution

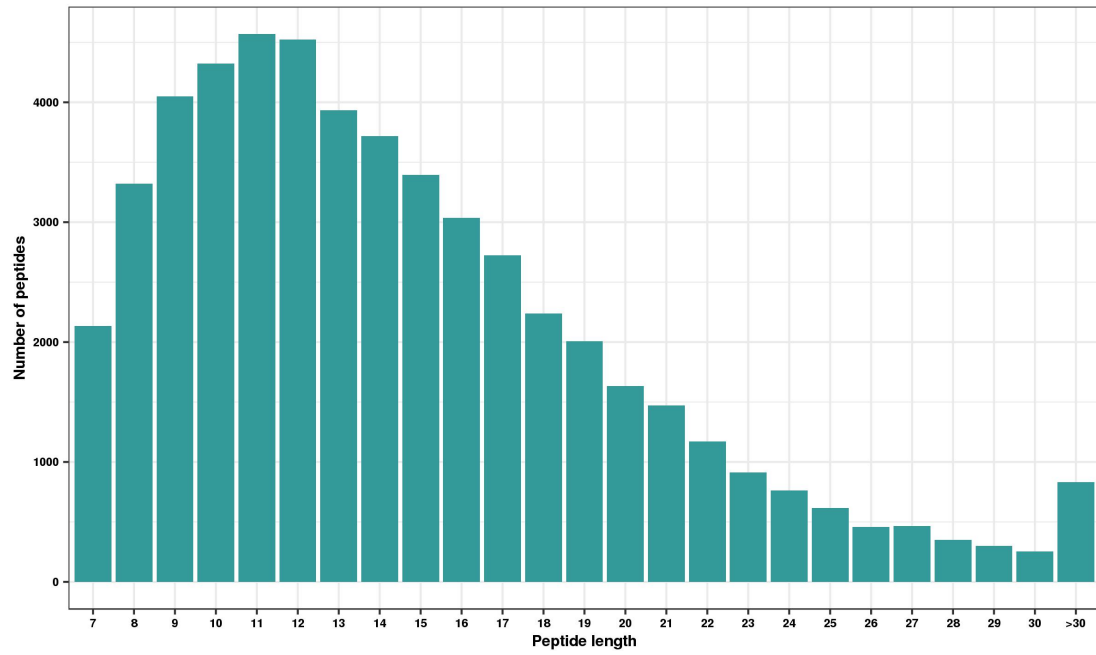

Identified protein mass distribution

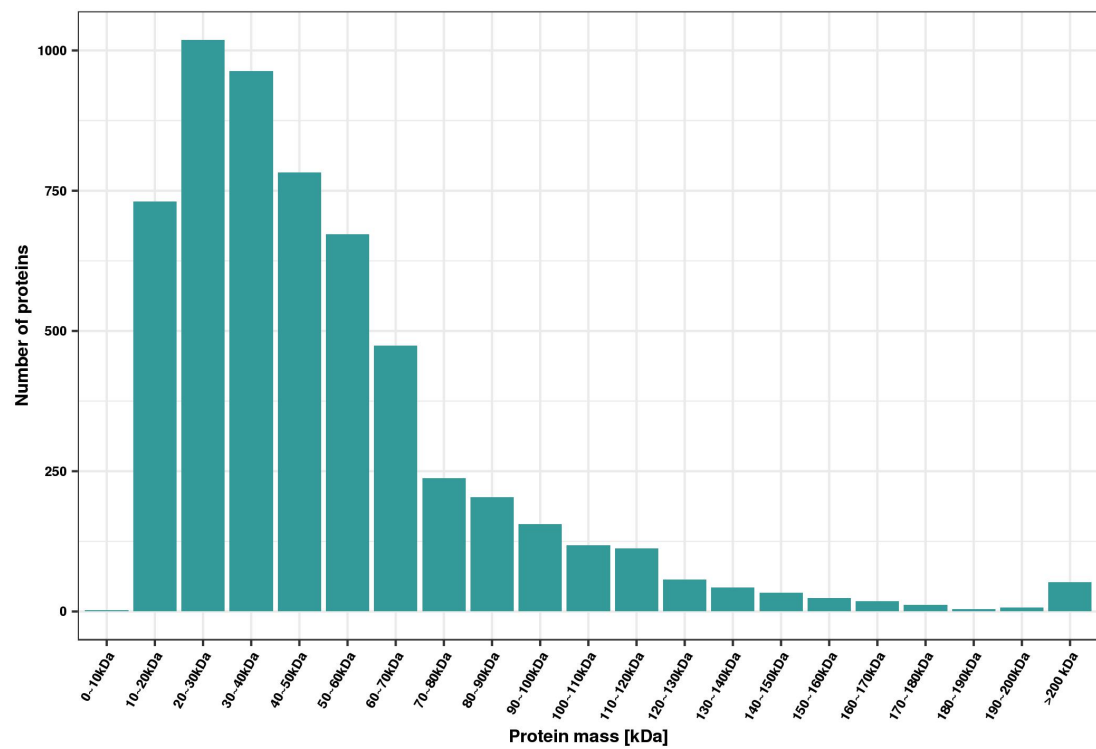

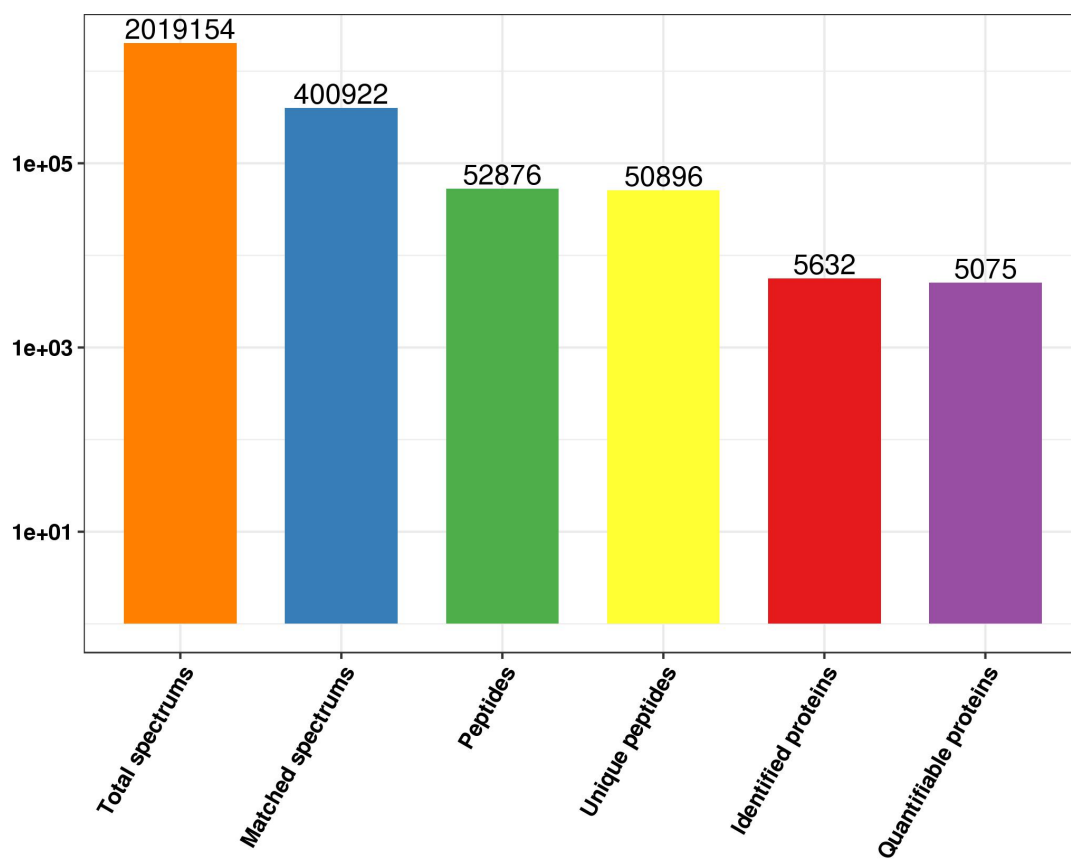

Supplement: s1 [file s1 › Supplementary 1.pdf]
