# Supplementary material
Source: MDPI journal article supplement (https://www.mdpi.com/1999-4907/12/10/1384)
Supplement: s1 [file s1 › Supplementary 2.pdf]

Table S1. Screened key DEPs

| Protein Description                                  | Gene name | R3/R1  | R4/R3  |
|------------------------------------------------------|-----------|--------|--------|
| Plant Hormone                                        |           |        |        |
| Histidine-containing phosphotransfer protein 1       | AHP1      | 0.5611 | 1.5958 |
| Absciscic acid receptor PYR1                         | PYR1      | 0.6509 | 1.1888 |
| Absciscic acid receptor PYR9                         | PYL9      | 2.6765 | 0.8963 |
| Absciscic acid receptor PYL8                         | PYL8      | 2.1238 | 0.8772 |
| Serine/threonine-protein kinase SRK2B                | SRK2B     | 1.5381 | 0.9534 |
| ABSCISIC ACID-INSENSITIVE 5-like protein 5           | ABF2      | 2.2512 | 0.9011 |
| REDOX state                                          |           |        |        |
| Putative respiratory burst oxidase homolog protein H | RBOHH     | 1.3905 | 2.1763 |
| Rhodanese-like domain-containing protein 15          | STR15     | 1.1015 | 2.0785 |
| L-ascorbate peroxidase 2                             | APX2      | 2.3173 | 0.7459 |
| Probable glutathione S-transferase                   | DHAR2     | 0.6495 | 1.8374 |
| Superoxide dismutase [Cu-Zn] 2                       | SODCC.2   | 2.0041 | 0.9698 |
| ATP sulfurylase 2                                    | APS2      | 0.5183 | 0.7859 |
| Iron-sulfur assembly protein IscA-like 1             | At2g16710 | 1.5874 | 1.39   |
| ATP sulfurylase 1                                    | APS1      | 0.5153 | 0.9158 |
| Catalase                                             | CAT1      | 1.1907 | 1.7114 |
| Superoxide dismutase [Fe] 2                          | FSD2      | 0.6827 | 0.6892 |
| Copper chaperone for superoxide dismutase            | CCS       | 1.3974 | 0.6586 |
| Selenium-binding protein 2                           | SBP2      | 1.6917 | 1.3908 |
| Frataxin                                             | FH        | 1.3937 | 1.281  |
| Glutathione hydrolase 3                              | GGT3      | 0.8574 | 0.7493 |

|                                                               |           |        |        |
|---------------------------------------------------------------|-----------|--------|--------|
| Puromycin-sensitive aminopeptidase                            | MPA1      | 1.0622 | 0.5792 |
| Glutathione S-transferase L3                                  | GSTL3     | 1.031  | 1.7687 |
| Probable glutathione S-transferase                            | HSP26-A   | 1.6967 | 1.7482 |
| Probable phospholipid hydroperoxide glutathione peroxidase 6  | GPX6      | 1.8502 | 0.8935 |
| Phosphoenolpyruvate carboxylase 4                             | PPC4      | 0.8299 | 1.8925 |
| Glucose-6-phosphate 1-dehydrogenase, cytoplasmic isoform      | G6PDH     | 1.3513 | 1.1709 |
| Inactive glucose-6-phosphate 1-dehydrogenase 4, chloroplastic | G6PD4     | 0.7129 | 0.8884 |
| 6-phosphogluconate dehydrogenase, decarboxylating 2           | PGD2      | 1.2506 | 1.3556 |
| Spermine synthase                                             | SPMS      | 2.6394 | 0.8586 |
| Ion channel                                                   |           |        |        |
| Calcium-transporting ATPase 9                                 | ACA9      | 0.5319 | 0.6051 |
| Calcium-transporting ATPase                                   | LCA1      | 0.5779 | --     |
| Plasma membrane ATPase 4                                      | PMA4      | 0.368  | 0.8838 |
| Cyclic nucleotide-gated ion channel 1                         | CNGC1     | 0.6078 | 0.9517 |
| Cation-chloride cotransporter 1                               | CCC1      | 0.5679 | 0.7385 |
| Aquaporin PIP2-7                                              | PIP2-7    | 0.6062 | 1.3758 |
| Aquaporin PIP1-1                                              | PIP1-1    | 0.5014 | 1.6361 |
| Sodium/proton antiporter 1                                    | NHD1      | 0.5581 | 1.2936 |
| Cytoskeleton                                                  |           |        |        |
| Tubulin alpha chain                                           | TUBA      | 0.644  | 0.788  |
| LIM domain-containing protein WLIM2b                          | WLIM2B    | 0.5023 | 0.7093 |
| Probable F-actin-capping protein subunit beta                 | At1g71790 | 0.6023 | 0.9675 |

|                                                       |           |        |        |
|-------------------------------------------------------|-----------|--------|--------|
| Tubulin beta-1 chain                                  | TUBB1     | 0.5376 | 0.6527 |
| Myosin-8                                              | XI-B      | 0.4928 | 0.9572 |
| 65-kDa microtubule-associated protein 6               | MAP65-6   | 0.8981 | 0.6556 |
| Actin-depolymerizing factor 6                         | ADF6      | 1.5217 | 0.6024 |
| Kinesin-like protein KIN-13A                          | KIN13A    | 0.5297 | 0.8289 |
| LIM domain-containing protein WLIM1                   | WLIM1     | 0.1169 | 0.6703 |
| Tubulin beta-5 chain                                  | TUBB5     | 0.6433 | 0.6466 |
| Kinesin-like protein KIN-13B                          | KIN13B    | 0.49   | --     |
| F-actin-capping protein subunit alpha                 | At3g05520 | 0.5058 | 0.8297 |
| Microtubule-associated protein RP/EB family member 1B | EB1B      | 0.6859 | 0.5256 |
| 65-kDa microtubule-associated protein 1               | MAP65-1   | 0.5382 | 0.5485 |
| Actin-depolymerizing factor 1                         | ADF1      | 0.8797 | 0.7094 |
| Protein MOR1                                          | MOR1      | 0.8406 | 0.7595 |
| Cell wall                                             |           |        |        |
| Cellulose synthase A catalytic subunit 1              | CESA1     | 0.2912 | --     |
| Cellulose synthase A catalytic subunit 3              | CESA3     | 0.1919 | --     |
| Cellulose synthase A catalytic subunit 4              | CESA4     | 0.1430 | --     |
| Probable glycosyltransferase STELLO1                  | STL1      | 0.4531 | 0.2396 |
| Probable xyloglucan 6-xylosyltransferase 5            | XXT5      | 0.6381 | 0.8683 |
| Xyloglucan 6-xylosyltransferase 1                     | XXT1      | 0.8617 | 0.6481 |
| Probable beta-1,4-xylosyltransferase IRX14H           | IRX14H    | 0.1470 | 0.6732 |
| Protein PECTIC ARABINOGALACTAN SYNTHESIS-             | PAGR      | 0.6869 | 0.6151 |

---

RELATED

|                                                         |              |        |        |
|---------------------------------------------------------|--------------|--------|--------|
| UDP-glucuronate 4-epimerase 1                           | GAE1         | 0.6279 | 0.6508 |
| Protein trichome birefringence-like 39                  | TBL39        | 0.3172 | 0.9079 |
| Protein trichome birefringence-like 38                  | TBL38        | 0.5921 | 0.7677 |
| Protein trichome birefringence-like 36                  | TBL36        | 0.0829 | --     |
| Protein REDUCED WALL ACETYLTATION 2                     | RWA2         | 0.617  | 0.9341 |
| Pectin acetylesterase 8                                 | PAE8         | 0.9879 | 0.6295 |
| Pectin acetylesterase 12                                | PAE12        | 1.2769 | 0.5451 |
| Probable pectin methylesterase CGR2                     | CGR2         | 0.3377 | 1.0972 |
| Laccase-7                                               | LAC7         | 1.2410 | 5.3646 |
| Peroxidase21                                            | PER21        | 0.7680 | 2.2727 |
| Peroxidase47                                            | PER47        | 7.8685 | 1.3266 |
| Peroxidase42                                            | PER42        | 0.6130 | 0.6621 |
| Peroxidase3                                             | PER3         | 1.9856 | 0.3876 |
| Glucose-1-phosphate adenylyltransferase small subunit 2 | AGPP         | 2.6307 | 0.4312 |
| Glucose-1-phosphate adenylyltransferase large subunit 1 | AGPS1        | 1.102  | 0.6369 |
| Protein MANNAN SYNTHESIS-RELATED 1                      | MSR1         | 0.5165 | 0.5443 |
| Mannan endo-1,4-beta-mannosidase 7                      | MAN7         | 2.1778 | 0.9709 |
| UDP-glucuronic acid decarboxylase 1                     | UXS1         | 0.7076 | 0.7585 |
| UDP-glucuronic acid decarboxylase 2                     | UXS2         | 0.6148 | 1.1564 |
| Probable arabinosyltransferase ARAD1                    | ARAD1        | 0.6285 | 1.072  |
| UDP-N-acetylglucosamine diphosphorylase 2               | GLCNAC-1PUT2 | 0.7766 | 0.1882 |

---

|                                          |         |        |        |
|------------------------------------------|---------|--------|--------|
| Probable pectin methyltransferase QUA2   | QUA2    | 0.5844 | 1.1118 |
| Protein CELLULOSE SYNTHASE INTERACTIVE 1 | CSI1    | 0.3088 | 0.4690 |
| Uclacyanin 1                             | UCC1    | 0.8461 | 0.2328 |
| Exocyst complex component EXO70B1        | EXO70B1 | 0.8349 | 0.7663 |

---
